# Supplementary material for: The applications of anterior segment optical coherence tomography in glaucoma: a 20-year bibliometric analysis
Source: PeerJ. 2024 Nov 28;12:e18611. doi: 10.7717/peerj.18611 (PMC11608565; doi:10.7717/peerj.18611)
Supplement: Supplemental Information 1 [file peerj-12-18611-s001.xlsx]

## Sheet: Sheet 1
AU	AF	CR	AB	AR	BE	BN	BP	C1	C3	CA	CL	CT	CY	DA	DE	DI	DT	EA	EF	EI	EM	EP	ER	FU	FX	GA	ID	IS	J9	JI	LA	NR	OA	OI	PA	PD	PG	PI	PM	PT	PU	PY	RI	RP	SC	SE	SI	SN	SO
MASLIN JS;BARKANA Y;DORAIRAJ SK	MASLIN, JESSICA S.;BARKANA, YANIV;DORAIRAJ, SYRIL K.	APTEL F, 2010, OPHTHALMOLOGY, V117, PC, DOI 10.1016/J.OPHTHA.2009.10.030;ASLANIDES IM, 1995, BRIT J OPHTHALMOL, V79, P972, DOI 10.1136/BJO.79.11.972;BABIGHIAN S, 2006, ACTA OPHTHALMOL SCAN, V84, P270, DOI 10.1111/J.1600-0420.2006.00616.X;BALIDIS MO, 2002, EYE, V16, P722, DOI 10.1038/SJ.EYE.6700116;BARKANA Y, 2007, ARCH OPHTHALMOL-CHIC, V125, P1331, DOI 10.1001/ARCHOPHT.125.10.1331;BASKARAN M, 201…	ANTERIOR SEGMENT IMAGING ALLOWS FOR AN OBJECTIVE METHOD OF VISUALIZING THE ANTERIOR SEGMENT ANGLE. TWO OF THE MOST COMMONLY USED DEVICES FOR ANTERIOR SEGMENT IMAGING INCLUDE THE ANTERIOR SEGMENT OPTICAL COHERENCE TOMOGRAPHY (AS-OCT) AND THE ULTRASOUND BIOMICROSCOPY (UBM). AS-OCT TECHNOLOGY HAS SEVERAL TYPES, INCLUDING TIME-DOMAIN, SWEPT-SOURCE, AND SPECTRAL-DOMAIN-BASED CONFIGURATIONS. WE PERFORM…				630	YALE UNIV, SCH MED, DEPT OPHTHALMOL & VISUAL SCI, NEW HAVEN, CT 06510 USA.; MAYO CLIN, DEPT OPHTHALMOL, JACKSONVILLE, FL 32224 USA.; ASSAF HAROFEH MED CTR, DEPT OPHTHALMOL, ZERIFIN, ISRAEL.;	YALE UNIVERSITY; MAYO CLINIC; TEL AVIV UNIVERSITY; SHAMIR MEDICAL CENTER (ASSAF HAROFEH)					2024-02-18	ANTERIOR SEGMENT IMAGING; ANTERIOR SEGMENT OPTICAL COHERENCE TOMOGRAPHY; ULTRASOUND BIOMICROSCOPY	10.4103/0301-4738.169787	REVIEW			1998-3689	DORAIRAJ.SYRIL@MAYO.EDU	640				CX4TY	OPTICAL COHERENCE TOMOGRAPHY; CHAMBER ANGLE MEASUREMENT; ULTRASOUND BIOMICROSCOPY; TRABECULECTOMY BLEBS; FILTERING BLEBS; PUPILLARY BLOCK; SCLERAL SPUR; IRIS CONFIGURATION; NARROW ANGLES; CLOSURE	8	INDIAN J OPHTHALMOL	INDIAN J. OPHTHALMOL.	ENGLISH	104	GREEN SUBMITTED, GREEN PUBLISHED, GOLD		WOLTERS KLUWER INDIA PVT LTD , A-202, 2ND FLR, QUBE, C T S NO 1498A-2 VILLAGE MAROL, ANDHERI EAST, MUMBAI, 400059, INDIA	AUG	11	MUMBAI	26576519	J	WOLTERS KLUWER MEDKNOW PUBLICATIONS	2015		DORAIRAJ, SK (CORRESPONDING AUTHOR), MAYO CLIN, 4500 SAN PABLO RD, JACKSONVILLE, FL 32224 USA.	OPHTHALMOLOGY			0301-4738	INDIAN JOURNAL OF OPHTHALMOLOGY
KRONBERG BP;RHEE DJ	KRONBERG, BENJAMIN P.;RHEE, DOUGLAS J.	AZUARA-BLANCO A, 2011, TRIALS, V12, DOI 10.1186/1745-6215-12-133;CHO YK, 2008, J CATARACT REFR SURG, V34, P1104, DOI 10.1016/J.JCRS.2008.03.023;CIMETTA DJ, 2008, EUR J OPHTHALMOL, V18, P77, DOI 10.1177/112067210801800113;DADA T, 2007, J CATARACT REFR SURG, V33, P837, DOI 10.1016/J.JCRS.2007.01.021;DAMJI KF, 2006, BRIT J OPHTHALMOL, V90, P1014, DOI 10.1136/BJO.2006.091447;DAWCZYNSKI J, 2007, EUR J…	ANTERIOR SEGMENT IMAGING MODALITIES INCLUDING ANTERIOR SEGMENT OPTICAL COHERENCE TOMOGRAPHY (AS-OCT) AND ULTRASOUND BIOMICROSCOPY (UBM) ARE INCREASINGLY WIDESPREAD, AND CAN QUANTIFY SEVERAL PARAMETERS OF THE ANTERIOR SEGMENT, SUCH AS ANTERIOR CHAMBER DEPTH AND ANGLE ANATOMY. THESE PARAMETERS ARE IMPORTANT TO ASSESS, PARTICULARLY IN PATIENTS WITH FORMS OF NARROW ANGLE GLAUCOMA. IN MANY CASES OF OP…				149	HARVARD UNIV, MASSACHUSETTS EYE & EAR INFIRM, SCH MED, BOSTON, MA 02115 USA.;	HARVARD UNIVERSITY; HARVARD MEDICAL SCHOOL; MASSACHUSETTS EYE & EAR INFIRMARY					2024-02-18	ANTERIOR SEGMENT OPTICAL COHERENCE TOMOGRAPHY (OCT); CATARACT EXTRACTION; INTRAOCULAR PRESSURE; NARROW ANGLE GLAUCOMA; OPEN ANGLE GLAUCOMA; PLATEAU IRIS SYNDROME; ULTRASOUND BIOMICROSCOPY (UBM)	10.3109/08820538.2012.708810	REVIEW			1744-5205	BKRONBERG@GMAIL.COM	154				041SD	OPTICAL COHERENCE TOMOGRAPHY; CLEAR CORNEAL PHACOEMULSIFICATION; LENS IMPLANTATION; ULTRASOUND BIOMICROSCOPY; NONGLAUCOMATOUS EYES; CLOSURE GLAUCOMA; CHAMBER ANGLE; EXTRACTION; REDUCTION; DEPTH	5-6	SEMIN OPHTHALMOL	SEMIN. OPHTHALMOL.	ENGLISH	55			530 WALNUT STREET, STE 850, PHILADELPHIA, PA 19106 USA	SEP-NOV	6	PHILADELPHIA	23163269	J	TAYLOR & FRANCIS INC	2012		KRONBERG, BP (CORRESPONDING AUTHOR), HARVARD UNIV, MASSACHUSETTS EYE & EAR INFIRM, SCH MED, 243 CHARLES ST, BOSTON, MA 02115 USA.	OPHTHALMOLOGY			0882-0538	SEMINARS IN OPHTHALMOLOGY
SALIM S;DORAIRAJ S	SALIM, SARWAT;DORAIRAJ, SYRIL	APTEL F, 2011, OPHTHALMOLOGY, V118, P1563, DOI 10.1016/J.OPHTHA.2011.01.001;ASLANIDES IM, 1995, BRIT J OPHTHALMOL, V79, P972, DOI 10.1136/BJO.79.11.972;ASRANI S, 2008, ARCH OPHTHALMOL-CHIC, V126, P765, DOI 10.1001/ARCHOPHT.126.6.765;AUNG T, 2005, OPHTHALMOLOGY, V112, P28, DOI 10.1016/J.OPHTHA.2004.06.033;BAEZ KA, 1992, OPHTHALMIC SURG LAS, V23, P426;BARKANA Y, 2007, ARCH OPHTHALMOL-CHIC, V125, P1…	ANTERIOR SEGMENT IMAGING ALLOWS OBJECTIVE ASSESSMENT OF THE ANTERIOR SEGMENT OF THE EYE, PARTICULARLY THE ANTERIOR CHAMBER ANGLE. BOTH QUALITATIVE AND QUANTITATIVE ANALYSES ARE POSSIBLE AND AID IN DETECTING AND MANAGING CLOSED-ANGLE AND OPEN-ANGLE MECHANISMS IN VARIOUS FORMS OF GLAUCOMA. THIS REVIEW FOCUSES PRIMARILY ON ANTERIOR SEGMENT OPTICAL COHERENCE TOMOGRAPHY AND ULTRASOUND BIOMICROSCOPY, W…				113	UNIV TENNESSEE, CTR HLTH SCI, MEMPHIS, TN 38163 USA.; MAYO CLIN, JACKSONVILLE, FL 32224 USA.;	UNIVERSITY OF TENNESSEE SYSTEM; UNIVERSITY OF TENNESSEE HEALTH SCIENCE CENTER; MAYO CLINIC					2024-02-18	ANTERIOR SEGMENT OPTICAL COHERENCE TOMOGRAPHY; GLAUCOMA; GONIOSCOPY; IMAGING; SCHEIMPFLUG PHOTOGRAPHY; ULTRASOUND BIOMICROSCOPY	10.3109/08820538.2013.777749	REVIEW			1744-5205	SSALIM@UTHSC.EDU	125				150PE	OPTICAL COHERENCE TOMOGRAPHY; PRIMARY ANGLE-CLOSURE; PIGMENT DISPERSION SYNDROME; LASER PERIPHERAL IRIDOTOMY; ULTRASOUND BIOMICROSCOPY; CHAMBER ANGLE; PUPILLARY BLOCK; HIGH-SPEED; SCHEIMPFLUG PHOTOGRAPHY; UVEAL EFFUSION	3	SEMIN OPHTHALMOL	SEMIN. OPHTHALMOL.	ENGLISH	90			530 WALNUT STREET, STE 850, PHILADELPHIA, PA 19106 USA	MAY	13	PHILADELPHIA	23697615	J	TAYLOR & FRANCIS INC	2013		SALIM, S (CORRESPONDING AUTHOR), UNIV TENNESSEE, GLAUCOMA SERV, HAMILTON EYE INST, 930 MADISON AVE,SUITE 470, MEMPHIS, TN 38163 USA.	OPHTHALMOLOGY			0882-0538	SEMINARS IN OPHTHALMOLOGY
NOLAN W	NOLAN, WINIFRED	BARKANA Y, 2007, ARCH OPHTHALMOL-CHIC, V125, P1331, DOI 10.1001/ARCHOPHT.125.10.1331;DADA T, 2007, J CATARACT REFR SURG, V33, P837, DOI 10.1016/J.JCRS.2007.01.021;DAWCZYNSKI J, 2007, EUR J OPHTHALMOL, V17, P363, DOI 10.1177/112067210701700314;DORAIRAJ SK, 2007, ARCH OPHTHALMOL-CHIC, V125, P734, DOI 10.1001/ARCHOPHT.125.6.734;GAZZARD G, BR J OPHTHALMOL;GÜNDÜZ K, 2007, OPHTHALMOLOGICA, V221, P305, …	RAPID ADVANCES IN ANTERIOR SEGMENT IMAGING ARE ENLIGHTENING CLINICIANS AND RESEARCHERS TO THE IMPORTANCE IN MAKING THE DIAGNOSIS OF PRIMARY ANGLE CLOSURE, TRYING TO ESTABLISH UNDERLYING CAUSAL MECHANISMS, AND EVALUATING TREATMENTS. ALTHOUGH THEY DO NOT REPLACE CONVENTIONAL ANGLE AND ANTERIOR SEGMENT EXAMINATION, THEY HOLD GREAT POTENTIAL FOR THE FUTURE.				115	BIRMINGHAM & MIDLAND EYE CTR, BIRMINGHAM B18 7QU, W MIDLANDS, ENGLAND.;						2024-02-18	ANTERIOR SEGMENT IMAGING; ANTERIOR SEGMENT OPTICAL COHERENCE TOMOGRAPHY; ULTRASOUND BIOMICROSCOPY	10.1097/ICU.0b013e3282f40bba	ARTICLE				WINNIE_NOLAN@YAHOO.COM	121				267YT	LASER PERIPHERAL IRIDOTOMY; CHAMBER ANGLE MEASUREMENT; TRABECULECTOMY BLEBS; ASIAN EYES; CLOSURE; REPRODUCIBILITY; MORPHOLOGY; GLAUCOMA	2	CURR OPIN OPHTHALMOL	CURR. OPIN. OPHTHALMOL.	ENGLISH	30		NOLAN, WINIFRED/0000-0001-9568-2232	530 WALNUT ST, PHILADELPHIA, PA 19106-3621 USA	MAR	7	PHILADELPHIA	18301284	J	LIPPINCOTT WILLIAMS & WILKINS	2008		NOLAN, W (CORRESPONDING AUTHOR), BIRMINGHAM & MIDLAND EYE CTR, DUDLEY RD, BIRMINGHAM B18 7QU, W MIDLANDS, ENGLAND.	OPHTHALMOLOGY			1040-8738	CURRENT OPINION IN OPHTHALMOLOGY
SHARMA R;SHARMA A;ARORA T;SHARMA S;SOBTI A;JHA B;CHATURVEDI N;DADA T	SHARMA, REETIKA;SHARMA, AJAY;ARORA, TARUN;SHARMA, SOURABH;SOBTI, AMIT;JHA, BHASKAR;CHATURVEDI, NEHA;DADA, TANUJ	ANG GS, 2010, CLIN EXP OPHTHALMOL, V38, P778, DOI 10.1111/J.1442-9071.2010.02360.X;ANG GS, 2011, J GLAUCOMA, V20, P577, DOI 10.1097/IJG.0B013E3181F7B26F;APTEL F, OPHTHALMOLOGY;APTEL F, 2010, OPHTHALMOLOGY, V117, PC, DOI 10.1016/J.OPHTHA.2009.10.030;APTEL F, 2009, EUR J OPHTHALMOL, V19, P223, DOI 10.1177/112067210901900208;ASRANI S, 2008, ARCH OPHTHALMOL-CHIC, V126, P765, DOI 10.1001/ARCHOPHT.126.…	OPTICAL COHERENCE TOMOGRAPHY (OCT) IS A CROSS-SECTIONAL, THREE-DIMENSIONAL, HIGH-RESOLUTION IMAGING MODALITY THAT USES LOW COHERENCE INTERFEROMETRY TO ACHIEVE AXIAL RESOLUTION IN THE RANGE OF 3-20 MU M. TWO OCT PLATFORMS HAVE BEEN DEVELOPED: TIME DOMAIN (TD-OCT) AND SPECTRAL (OR FOURIER) DOMAIN (SD/FD-OCT). VISANTE ANTERIOR SEGMENT OCT (CARL ZEISS MEDITEC) IS A TD-OCT WIDELY USED FOR ANTERIOR SEG…				311	ALL INDIA INST MED SCI, DR RAJENDRA PRASAD CTR OPHTHALM SCI, GLAUCOMA FACIL, NEW DELHI 110029, INDIA.;	ALL INDIA INSTITUTE OF MEDICAL SCIENCES (AIIMS) NEW DELHI; DR. RAJENDRA PRASAD CENTRE FOR OPHTHALMIC SCIENCES					2024-02-18	OPTICAL COHERENCE TOMOGRAPHY; RESOLUTION; INTERFEROMETRY; QUANTITATIVE ASSESSMENT; SECONDARY GLAUCOMA; GLAUCOMA DRAINAGE DEVICES; BIOMETRY	10.1016/j.survophthal.2013.06.005	REVIEW			1879-3304	TANUJDADA@GMAIL.COM	327				AG1TW	PRIMARY ANGLE-CLOSURE; LASER PERIPHERAL IRIDOTOMY; INTRAOCULAR-LENS IMPLANTATION; HUMOR OUTFLOW STRUCTURES; CHAMBER ANGLE; ULTRASOUND BIOMICROSCOPY; TRABECULECTOMY BLEBS; IRIDOCORNEAL ANGLE; SECONDARY GLAUCOMA; FILTERING BLEBS	3	SURV OPHTHALMOL	SURV. OPHTHALMOL.	ENGLISH	127			STE 800, 230 PARK AVE, NEW YORK, NY 10169 USA	MAY-JUN	17	NEW YORK	24138894	J	ELSEVIER SCIENCE INC	2014	CHATURVEDI, NEHA/JYO-4873-2024	DADA, T (CORRESPONDING AUTHOR), ALL INDIA INST MED SCI, DR RAJENDRA PRASAD CTR OPHTHALM SCI, NEW DELHI 110029, INDIA.	OPHTHALMOLOGY			0039-6257	SURVEY OF OPHTHALMOLOGY
QIAN YY;LIU L;SHI YH;WANG ML;LI M;ZOU J	QIAN, YIYONG;LIU, LIN;SHI, YUEHUI;WANG, MINLI;LI, MIN;ZOU, JUN	BODH SONAM A, 2011, OMAN J OPHTHALMOL, V4, P3, DOI 10.4103/0974-620X.77655;CARREÑO E, 2011, J OPHTHALMIC INFLAMM, V1, P43, DOI 10.1007/S12348-010-0012-8;CUNNINGHAM ET, 2017, OCUL IMMUNOL INFLAMM, V25, P737, DOI 10.1080/09273948.2017.1415077;DETORAKIS ET, 2014, INT OPHTHALMOL, V34, P781, DOI 10.1007/S10792-013-9872-X;FU HZ, 2019, AM J OPHTHALMOL, V203, P37, DOI 10.1016/J.AJO.2019.02.028;IKEGAWA W,…	OBJECTIVE TO INVESTIGATE THE CLINICAL INDICATIONS OF ULTRASOUND BIOMICROSCOPY (UBM) AND ANTERIOR SEGMENT OPTICAL COHERENCE TOMOGRAPHY (AS-OCT) IN EYES WITH INFLAMMATORY GLAUCOMA. METHODS SIXTEEN PATIENTS (16 EYES) WITH INFLAMMATORY GLAUCOMA WERE ANALYSED RETROSPECTIVELY. ALL OF THE SUBJECTS UNDERWENT UBM AND AS-OCT SCANS, MEASURING THE FOLLOWING PARAMETERS: CENTRAL CORNEAL THICKNESS (CCT), CENTRA…	0300060519867808			5950	TONGJI UNIV, SCH MED, SHANGHAI PEOPLES HOSP 10, DEPT OPHTHALMOL, 301 MIDDLE YAN CHANG RD, SHANGHAI 200072, PEOPLES R CHINA.;	TONGJI UNIVERSITY					2024-02-18	ULTRASOUND BIOMICROSCOPY; ANTERIOR SEGMENT OPTICAL COHERENCE TOMOGRAPHY; INFLAMMATORY GLAUCOMA; ANTERIOR SEGMENT; ANTERIOR SEGMENT IMAGING; GLAUCOMA	10.1177/0300060519867808	ARTICLE; EARLY ACCESS	OCT 2019		1473-2300	ZOUJUN70@126.COM	5956		SHANGHAI MUNICIPAL NATURAL SCIENCE FOUNDATION [16ZR1426700]; PROJECT OF SHANGHAI SCIENCE AND TECHNOLOGY [17411950207]; CLINICAL SCIENCE AND TECHNOLOGY INNOVATION PROJECT OF SHANGHAI SHEN KANG HOSPITAL DEVELOPMENT CENTER [SHDC120 18103]	THIS WORK WAS SUPPORTED BY THE SHANGHAI MUNICIPAL NATURAL SCIENCE FOUNDATION (NO. 16ZR1426700 TO J.Z.), THE PROJECT OF SHANGHAI SCIENCE AND TECHNOLOGY (NO. 17411950207 TO J.Z.), AND THE CLINICAL SCIENCE AND TECHNOLOGY INNOVATION PROJECT OF SHANGHAI SHEN KANG HOSPITAL DEVELOPMENT CENTER (NO. SHDC120 18103 TO J.Z.).	JV5FD	ANGLE; EYES	12	J INT MED RES	J. INT. MED. RES.	ENGLISH	21	GREEN PUBLISHED, GOLD	QIAN, YIYONG/0000-0002-4519-3040	1 OLIVERS YARD, 55 CITY ROAD, LONDON EC1Y 1SP, ENGLAND	2019 DEC	7	LONDON	31594445	J	SAGE PUBLICATIONS LTD	2019		ZOU, J (CORRESPONDING AUTHOR), TONGJI UNIV, SCH MED, SHANGHAI PEOPLES HOSP 10, DEPT OPHTHALMOL, 301 MIDDLE YAN CHANG RD, SHANGHAI 200072, PEOPLES R CHINA.	RESEARCH & EXPERIMENTAL MEDICINE; PHARMACOLOGY & PHARMACY			0300-0605	JOURNAL OF INTERNATIONAL MEDICAL RESEARCH
FU HZ;XU YW;LIN S;WONG DWK;BASKARAN M;MAHESH M;AUNG T;LIU J	FU, HUAZHU;XU, YANWU;LIN, STEPHEN;WONG, DAMON WING KEE;BASKARAN, MANI;MAHESH, MEENAKSHI;AUNG, TIN;LIU, JIANG	ANG M, 2018, PROG RETIN EYE RES, V66, P132, DOI 10.1016/J.PRETEYERES.2018.04.002;ANONYMOUS, J BIOMEDICAL OPTICS;ARBELÁEZ P, 2011, IEEE T PATTERN ANAL, V33, P898, DOI 10.1109/TPAMI.2010.161;CIRESAN D, 2012, PROC CVPR IEEE, P3642, DOI 10.1109/CVPR.2012.6248110;CONSOLE JW, 2008, BRIT J OPHTHALMOL, V92, P1612, DOI 10.1136/BJO.2007.129932;DALAL N., 2005, PROC CVPR IEEE, VVOLUME 1, P886, DOI 10.1109/CV…	IRREVERSIBLE VISUAL IMPAIRMENT IS OFTEN CAUSED BY PRIMARY ANGLE-CLOSURE GLAUCOMA, WHICH COULD BE DETECTED VIA ANTERIOR SEGMENT OPTICAL COHERENCE TOMOGRAPHY (AS-OCT). IN THIS PAPER, AN AUTOMATED SYSTEM BASED ON DEEP LEARNING IS PRESENTED FOR ANGLE-CLOSURE DETECTION IN AS-OCT IMAGES. OUR SYSTEM LEARNS A DISCRIMINATIVE REPRESENTATION FROM TRAINING DATA THAT CAPTURES SUBTLE VISUAL CUES NOT MODELED BY…				3358	INCEPT INST ARTIFICIAL INTELLIGENCE, ABU DHABI, U ARAB EMIRATES.; AGCY SCI TECHNOL & RES, INST INFOCOMM RES, SINGAPORE 138632, SINGAPORE.; BAIDU INC, DEPT ARTIFICIAL INTELLIGENCE INNOVAT BUSINESS, BEIJING 100193, PEOPLES R CHINA.; MICROSOFT RES, BEIJING 100080, PEOPLES R CHINA.; SINGAPORE EYE RES INST, SINGAPORE 168751, SINGAPORE.; NANYANG TECHNOL UNIV, ADV OCULAR IMAGING, SINGAPORE 138632, SINGA…	AGENCY FOR SCIENCE TECHNOLOGY & RESEARCH (A*STAR); A*STAR - INSTITUTE FOR INFOCOMM RESEARCH (I2R); BAIDU; MICROSOFT; SINGAPORE NATIONAL EYE CENTER; NATIONAL UNIVERSITY OF SINGAPORE; NANYANG TECHNOLOGICAL UNIVERSITY; NATIONAL UNIVERSITY OF SINGAPORE; CHINESE ACADEMY OF SCIENCES; SOUTHERN UNIVERSITY OF SCIENCE & TECHNOLOGY					2024-02-18	IMAGE SEGMENTATION; DEEP LEARNING; FEATURE EXTRACTION; IMAGING; IRIS; VISUALIZATION; CORNEA; ANGLE-CLOSURE DETECTION; ANTERIOR CHAMBER ANGLE (ACA); ANTERIOR SEGMENT OPTICAL COHERENCE TOMOGRAPHY (AS-OCT); DEEP LEARNING	10.1109/TCYB.2019.2897162	ARTICLE			2168-2275	HUAZHUFU@GMAIL.COM; YWXU@IEEE.ORG	3366		BEP [1521480034]; NINGBO 3315 INNOVATION TEAM [Y61102DL03]; NATIONAL NATURAL SCIENCE FOUNDATION OF CHINA [61602345]	THIS WORK WAS SUPPORTED IN PART BY BEP UNDER GRANT 1521480034, IN PART BY THE NINGBO 3315 INNOVATION TEAM UNDER GRANT Y61102DL03, AND IN PART BY THE NATIONAL NATURAL SCIENCE FOUNDATION OF CHINA UNDER GRANT 61602345. THIS PAPER WAS RECOMMENDED BY ASSOCIATE EDITOR L. SHAO.	MD5TP	OPTICAL COHERENCE TOMOGRAPHY; DIABETIC-RETINOPATHY; ORIENTED GRADIENTS; NARROW ANGLES; GLAUCOMA; CLASSIFICATION; ASSOCIATION; VALIDATION; HISTOGRAMS; IMAGES	7	IEEE T CYBERNETICS	IEEE T. CYBERN.	ENGLISH	54	GREEN SUBMITTED	WONG, DAMON/0000-0003-4601-9121; FU, HUAZHU/0000-0002-9702-5524; LIU, JIANG JIMMY/0000-0001-6281-6505; XU, YANWU/0000-0002-1779-931X	445 HOES LANE, PISCATAWAY, NJ 08855-4141 USA	JUL	9	PISCATAWAY	30794201	J	IEEE-INST ELECTRICAL ELECTRONICS ENGINEERS INC	2020	WONG, DAMON/JCE-8444-2023; MANI, BASKARAN/GWZ-8299-2022; FU, HUAZHU/A-1411-2014; LIU, JIANG JIMMY/AHB-8921-2022; TIN, AUNG/B-6521-2009; WANG, MENG/ITR-8699-2023	FU, HZ (CORRESPONDING AUTHOR), INCEPT INST ARTIFICIAL INTELLIGENCE, ABU DHABI, U ARAB EMIRATES.; XU, YW (CORRESPONDING AUTHOR), BAIDU INC, DEPT ARTIFICIAL INTELLIGENCE INNOVAT BUSINESS, BEIJING 100193, PEOPLES R CHINA.	AUTOMATION & CONTROL SYSTEMS; COMPUTER SCIENCE			2168-2267	IEEE TRANSACTIONS ON CYBERNETICS
KIDDEE W;TROPE GE	KIDDEE, WEERAWAT;TROPE, GRAHAM E.	ALVARENGA LS, 2004, AM J OPHTHALMOL, V138, P200, DOI 10.1016/J.AJO.2004.02.058;BERSUDSKY V, 2011, CORNEA, V30, P709, DOI 10.1097/ICO.0B013E3181FB8378;CARRILLO MM, 2005, CAN J OPHTHALMOL, V40, P499, DOI 10.1016/S0008-4182(05)80013-4;CHRISTAKIS PG, 2011, OPHTHALMOLOGY, V118, P2180, DOI 10.1016/J.OPHTHA.2011.05.004;CHRISTAKIS PG, 2011, OPHTHALMOLOGY, V118, P2172, DOI 10.1016/J.OPHTHA.2011.05.003;CHU…	PURPOSE:ANTERIOR SEGMENT OPTICAL COHERENCE TOMOGRAPHY (AS-OCT) WAS USED TO DIAGNOSE AHMED TUBE TIP PATENCY IN PATIENTS WITH OPAQUE CORNEAS AFTER CORNEAL TRANSPLANTATION AND TUBE SHORTENING.MATERIALS AND METHODS:NONCOMPARATIVE OBSERVATIONAL CASE SERIES: 3 CONSECUTIVE PATIENTS WITH NONVISUALIZED TUBES AND UNCONTROLLED INTRAOCULAR PRESSURE AFTER CORNEAL TRANSPLANTATION UNDERWENT AS-OCT TO DETERMINE …				773	PRINCE SONGKLA UNIV, DEPT OPHTHALMOL, FAC MED, HAT YAI, THAILAND.; UNIV TORONTO, TORONTO WESTERN HOSP, DEPT OPHTHALMOL & VIS SCI, UNIV HLTH NETWORK, TORONTO, ON M5T 2S8, CANADA.;	PRINCE OF SONGKLA UNIVERSITY; UNIVERSITY OF TORONTO; UNIVERSITY HEALTH NETWORK TORONTO					2024-02-18	ANTERIOR SEGMENT OPTICAL COHERENCE TOMOGRAPHY; GLAUCOMA DRAINAGE DEVICES; PENETRATING KERATOPLASTY; KERATOPROSTHESIS; OPAQUE CORNEA; OBSTRUCTION	10.1097/IJG.0b013e31825afc6b	ARTICLE			1536-481X	GRAHAM.TROPE@UHN.CA	775				272JE	PENETRATING KERATOPLASTY; SECONDARY GLAUCOMA; TREATMENT-OUTCOMES; TRABECULECTOMY; COMPLICATIONS; BAERVELDT; DESIGN	9	J GLAUCOMA	J. GLAUCOMA	ENGLISH	13		KIDDEE, WEERAWAT/0000-0002-0055-8210	530 WALNUT ST, PHILADELPHIA, PA 19106-3621 USA	DEC	3	PHILADELPHIA	22668979	J	LIPPINCOTT WILLIAMS & WILKINS	2013	KIDDEE, WEERAWAT/ABH-3241-2020	TROPE, GE (CORRESPONDING AUTHOR), TORONTO WESTERN HOSP, 399 BATHURST ST,NEW 6-411, TORONTO, ON M5T 2S8, CANADA.	OPHTHALMOLOGY			1057-0829	JOURNAL OF GLAUCOMA
JANCEVSKI M;FOSTER CS	JANCEVSKI, MARIA;FOSTER, C. STEPHEN	APTEL F, 2009, OPHTHALMOLOGY 1116;BAÏKOFF G, 2005, J CATARACT REFR SURG, V31, P674, DOI 10.1016/J.JCRS.2004.09.034;CHOI CY, 2009, CORNEA, V28, P536, DOI 10.1097/ICO.0B013E31819140A9;CHUA J, 2009, CORNEA, V28, P243, DOI 10.1097/ICO.0B013E318188036D;CIANCAGLINI M, 2008, J GLAUCOMA, V17, P308, DOI 10.1097/IJG.0B013E31815C3A19;DADA T, 2007, J CATARACT REFR SURG, V33, P837, DOI 10.1016/J.JCRS.2007.01.…	OPTICAL COHERENCE TOMOGRAPHY (OCT) IS A NON-CONTACT OPTICAL SIGNAL ACQUISITION AND PROCESSING DEVICE THAT PROVIDES MAGNIFIED, HIGH RESOLUTION CROSS-SECTIONAL IMAGES OF OCULAR TISSUES. DEVELOPMENT OF ANTERIOR SEGMENT OCT (AS-OCT) OFFERS THE BENEFITS OF FINE RESOLUTION AND NONINVASIVE EXAMINATION TO INVESTIGATION OF ANTERIOR SEGMENT ANATOMY TO THE DEPTH OF THE IRIS PLANE. THIS IMAGING DEVICE HAS BE…				317	MASSACHUSETTS EYE RES & SURG INST, CAMBRIDGE, MA 02142 USA.; OCULAR IMMUNOL & UVEITIS FDN, CAMBRIDGE, MA USA.;						2024-02-18	ANTERIOR SEGMENT; OPTICAL COHERENCE TOMOGRAPHY	10.3109/08820538.2010.518473	ARTICLE			1744-5205	MACICO@YAHOO.COM	323				802HJ	ULTRASOUND BIOMICROSCOPY; IN-VIVO; CHAMBER ANGLE; CORNEAL; KERATOPLASTY; DIAGNOSIS; MEMBRANE; GLAUCOMA; SURGERY; RETINA	5-6	SEMIN OPHTHALMOL	SEMIN. OPHTHALMOL.	ENGLISH	48			530 WALNUT STREET, STE 850, PHILADELPHIA, PA 19106 USA	SEP-NOV	7	PHILADELPHIA	21091018	J	TAYLOR & FRANCIS INC	2010		JANCEVSKI, M (CORRESPONDING AUTHOR), MASSACHUSETTS EYE RES & SURG INST, 5 CAMBRIDGE CTR,8TH FLOOR, CAMBRIDGE, MA 02142 USA.	OPHTHALMOLOGY		SI	0882-0538	SEMINARS IN OPHTHALMOLOGY
PORPORATO N;BASKARAN M;AUNG T	PORPORATO, NATALIA;BASKARAN, MANI;AUNG, TIN	ANG BCH, 2016, CLIN EXP OPHTHALMOL, V44, P159, DOI 10.1111/CEO.12673;ANG GS, 2010, CLIN EXP OPHTHALMOL, V38, P778, DOI 10.1111/J.1442-9071.2010.02360.X;ANG GS, 2011, J GLAUCOMA, V20, P577, DOI 10.1097/IJG.0B013E3181F7B26F;APTEL F, 2012, INVEST OPHTH VIS SCI, V53, P4005, DOI 10.1167/IOVS.11-9387;APTEL F, 2010, OPHTHALMOLOGY, V117, PC, DOI 10.1016/J.OPHTHA.2009.10.030;ARIMURA S, 2015, GRAEF ARCH CL…	THIS ARTICLE AIMS TO REVIEW THE PUBLISHED LITERATURE PERTAINING TO THE USE OF ANTERIOR SEGMENT OPTICAL COHERENCE TOMOGRAPHY (AS-OCT) IN THE EVALUATION OF ANGLE-CLOSURE DISEASE. SEARCHES ON THE AVAILABLE PUBLISHED LITERATURE WERE LAST CONDUCTED ON 15 JUNE 2017. RATED AS LEVEL I EVIDENCE, WE FOUND THAT AS-OCT HAS SHOWN GOOD SENSITIVITY AND MODERATE DIAGNOSTIC ACCURACY TO DETECT NARROW ANGLES WHEN C…				147	SINGAPORE NATL EYE CTR, SINGAPORE EYE RES INST, 11 THIRD HOSP AVE, SINGAPORE 168751, SINGAPORE.; DUKE NUS GRAD MED SCH, SINGAPORE, SINGAPORE.; NATL UNIV SINGAPORE, YONG LOO LIN SCH MED, SINGAPORE, SINGAPORE.;	NATIONAL UNIVERSITY OF SINGAPORE; SINGAPORE NATIONAL EYE CENTER; NATIONAL UNIVERSITY OF SINGAPORE; NATIONAL UNIVERSITY OF SINGAPORE					2024-02-18	ANGLE CLOSURE; GLAUCOMA; NARROW ANGLE; OPTICAL COHERENCE TOMOGRAPHY	10.1111/ceo.13120	REVIEW			1442-9071	AUNG.TIN@SINGHEALTH.COM.SG	157		NATIONAL MEDICAL RESEARCH COUNCIL; AGENCY FOR SCIENCE, TECHNOLOGY AND RESEARCH (A*STAR)	SUPPORTED BY GRANTS FROM NATIONAL MEDICAL RESEARCH COUNCIL AND AGENCY FOR SCIENCE, TECHNOLOGY AND RESEARCH (A*STAR).	GA5NY	LASER PERIPHERAL IRIDOTOMY; CHAMBER ANGLE; NARROW ANGLES; ULTRASOUND BIOMICROSCOPY; QUANTITATIVE-ANALYSIS; INTRAOCULAR-PRESSURE; LONGITUDINAL CHANGES; IRIDOCORNEAL ANGLE; PUPIL-DILATION; SCLERAL SPUR	2	CLIN EXP OPHTHALMOL	CLIN. EXP. OPHTHALMOL.	ENGLISH	81	BRONZE	PORPORATO, NATALIA/0000-0001-5635-0243	111 RIVER ST, HOBOKEN 07030-5774, NJ USA	MAR	11	HOBOKEN	29193702	J	WILEY	2018	MANI, BASKARAN/GWZ-8299-2022; TIN, AUNG/B-6521-2009	AUNG, T (CORRESPONDING AUTHOR), SINGAPORE NATL EYE CTR, SINGAPORE EYE RES INST, 11 THIRD HOSP AVE, SINGAPORE 168751, SINGAPORE.	OPHTHALMOLOGY		SI	1442-6404	CLINICAL AND EXPERIMENTAL OPHTHALMOLOGY
WANG DJ;LIN S	WANG, DAJIANG;LIN, SHAN	ARIMURA S, 2015, GRAEF ARCH CLIN EXP, V253, P307, DOI 10.1007/S00417-014-2817-X;ASRANI S, 2008, ARCH OPHTHALMOL-CHIC, V126, P765, DOI 10.1001/ARCHOPHT.126.6.765;BALD M, 2012, J OPHTHALMOL, V2012, DOI 10.1155/2012/103704;CHEN RI, 2015, JAMA OPHTHALMOL, V133, P437, DOI 10.1001/JAMAOPHTHALMOL.2014.5864;CHEUNG CY, 2011, BRIT J OPHTHALMOL, V95, P955, DOI 10.1136/BJO.2010.189217;CHEUNG CYL, 2010, INVES…	PURPOSE OF REVIEWTHE AIM OF THE PRESENT REVIEW WAS TO SUMMARIZE THE NEW DEVELOPMENTS IN ANTERIOR SEGMENT OPTICAL COHERENCE TOMOGRAPHY (AS-OCT) FOR GLAUCOMA.RECENT FINDINGSRECENT YEARS HAVE DEMONSTRATED SIGNIFICANT ADVANCES IN THE MEASUREMENT OF GLAUCOMA THROUGH THE USE OF AS-OCT. FURTHERMORE, A MORE WIDESPREAD USE OF AS-OCT IN THE CLINICAL STUDY OF VARIOUS GLAUCOMAS WARRANTS REVIEW, WHICH INCLUDE…				111	GEN HOSP PLA, DEPT OPHTHALMOL, 28TH FUXING RD, BEIJING 100853, PEOPLES R CHINA.; UNIV CALIF SAN FRANCISCO, DEPT OPHTHALMOL, 10 KORET WAY, SAN FRANCISCO, CA 94143 USA.;	CHINESE PEOPLE'S LIBERATION ARMY GENERAL HOSPITAL; UNIVERSITY OF CALIFORNIA SYSTEM; UNIVERSITY OF CALIFORNIA SAN FRANCISCO					2024-02-18	ANGLE CLOSURE; ANTERIOR SEGMENT OPTICAL COHERENCE TOMOGRAPHY; GLAUCOMA	10.1097/ICU.0000000000000243	REVIEW			1531-7021	SHAN.LIN@UCSF.EDU	117				DD1CU	CHAMBER ANGLE MEASUREMENTS; DRAINAGE IMPLANT-SURGERY; AMERICAN CAUCASIANS; MAINLAND CHINESE; QUANTITATIVE-ANALYSIS; IRIS CONFIGURATION; FILTERING BLEB; ETHNIC CHINESE; NARROW ANGLES; ASIAN EYES	2	CURR OPIN OPHTHALMOL	CURR. OPIN. OPHTHALMOL.	ENGLISH	53		WANG, DAJIANG/0000-0002-8726-1996	TWO COMMERCE SQ, 2001 MARKET ST, PHILADELPHIA, PA 19103 USA	MAR	7	PHILADELPHIA	26720777	J	LIPPINCOTT WILLIAMS & WILKINS	2016	LIN, KUAN-YU/JXM-6653-2024; WANG, WEI/JBS-7400-2023; CHEN, XIN/JDN-2017-2023	LIN, S (CORRESPONDING AUTHOR), 8 KORET WAY,SUITE U519, SAN FRANCISCO, CA 94143 USA.	OPHTHALMOLOGY			1040-8738	CURRENT OPINION IN OPHTHALMOLOGY
CHUA J;MEHTA JS;TAN DTH	CHUA, JOCELYN;MEHTA, JODHBIR S.;TAN, DONALD T. H.	BAÏKOFF G, 2006, J CATARACT REFR SURG, V32, P1827, DOI 10.1016/J.JCRS.2006.08.025;BAKRI SJ, 2007, OPHTHAL SURG LAS IM, V38, P27, DOI 10.3928/15428877-20070101-04;LAI MM, 2006, J CATARACT REFR SURG, V32, P1860, DOI 10.1016/J.JCRS.2006.05.030;LI Y, 2007, OPHTHALMOLOGY, V114, P1124, DOI 10.1016/J.OPHTHA.2006.09.031;MEMARZADEH F, 2007, BRIT J OPHTHALMOL, V91, P189, DOI 10.1136/BJO.2006.100099;NOLAN W…	PURPOSE: TO DESCRIBE THE USE OF ANTERIOR SEGMENT OPTICAL COHERENCE TOMOGRAPHY (AS-OCT) IN THE EVALUATION OF A PATIENT WITH RAISED INTRAOCULAR PRESSURES AFTER PENETRATING KERATOPLASTY. METHODS: A 52-YEAR-OLD INDIAN MALE WITH BILATERAL KERATOCONUS UNDERWENT MULTIPLE PENETRATING KERATOPLASTIES BECAUSE OF REPEATED EPISODES OF ENDOTHELIAL REJECTION AND GRAFT FAILURE. HE ALSO HAD SECONDARY GLAUCOMA BIL…				243	SINGAPORE NATL EYE CTR, CORNEA & EXTERNAL DIS SERV, SINGAPORE 168751, SINGAPORE.; SINGAPORE EYE RES INST, SINGAPORE, SINGAPORE.; NATL UNIV SINGAPORE, DEPT OPHTHALMOL, SINGAPORE 119074, SINGAPORE.;	SINGAPORE NATIONAL EYE CENTER; NATIONAL UNIVERSITY OF SINGAPORE; SINGAPORE NATIONAL EYE CENTER; NATIONAL UNIVERSITY OF SINGAPORE					2024-02-18	ANTERIOR SEGMENT OPTICAL COHERENCE TOMOGRAPHY; GLAUCOMA; PENETRATING KERATOPLASTY	10.1097/ICO.0b013e318188036d	ARTICLE				JOCELYNCHUA77@YAHOO.COM	245				400BX	EYES	2	CORNEA	CORNEA	ENGLISH	8			530 WALNUT ST, PHILADELPHIA, PA 19106-3621 USA	FEB	3	PHILADELPHIA	19158578	J	LIPPINCOTT WILLIAMS & WILKINS	2009	MEHTA, JODHBIR/O-6192-2015	CHUA, J (CORRESPONDING AUTHOR), SINGAPORE NATL EYE CTR, DEPT GLAUCOMA SERV, 11 3RD HOSP AVE, SINGAPORE 168751, SINGAPORE.	OPHTHALMOLOGY			0277-3740	CORNEA
NAKAMINE S;SAKAI H;ARAKAKI Y;YONAHARA M;KAIYA T	NAKAMINE, SAKARI;SAKAI, HIROSHI;ARAKAKI, YOSHIKUNI;YONAHARA, MICHIKO;KAIYA, TADAYOSHI	ARAIE MAKOTO, 2012, NIPPON GANKA GAKKAI ZASSHI, V116;CHENG ACK, 2006, J CATARACT REFR SURG, V32, P1015, DOI 10.1016/J.JCRS.2006.02.033;DADA T, 2007, J CATARACT REFR SURG, V33, P837, DOI 10.1016/J.JCRS.2007.01.021;FOSTER PJ, 2002, BRIT J OPHTHALMOL, V86, P238, DOI 10.1136/BJO.86.2.238;FOSTER PJ, 2001, BRIT J OPHTHALMOL, V85, P1277, DOI 10.1136/BJO.85.11.1277;HENZAN IM, 2010, OPHTHALMOLOGY, V117, P…	TO STUDY THE EFFECT OF THE INTERNAL FIXATION LAMP ON ANTERIOR CHAMBER WIDTH MEASURED BY ANTERIOR SEGMENT OPTICAL COHERENCE TOMOGRAPHY. IN A PROSPECTIVE CROSS SECTIONAL OBSERVATIONAL STUDY, CONSECUTIVE 22 RIGHT EYES OF 22 PATIENTS (4 MEN AND 18 WOMEN) WITH SUSPECTED PRIMARY ANGLE CLOSURE UNDERWENT SWEPT SOURCE DOMAIN ANTERIOR SEGMENT OPTICAL COHERENCE TOMOGRAPHY (AS-OCT), (CASIA SS-1000, TOMEY, NA…				48	UNIV RYUKYUS, OPHTHALMOL, 207 UEHARA, NISHIHARA, OKINAWA 9030215, JAPAN.; KAIYA EYE CLIN, HAMAMATSU, SHIZUOKA 4300903, JAPAN.;	UNIVERSITY OF THE RYUKYUS					2024-02-18	AS-OCT; FIXATION LAMP; ANGLE WIDTH; MIOSIS	10.1007/s10384-017-0533-x	ARTICLE			1613-2246	HI-HIRO@MTF.BIGLOBE.NE.JP	53		ALCON; NOVARTIS; HOYA; OTSUKA; PFIZER; SANTEN; SCAMPO; SENJU; TOMEY; KOWA; CHUO SANGIO	S. NAKAMINE, NONE; H. SAKAI, PATENT (TOMEY, THE UNIVERSITY OF THE RYUKYUS, AND THE AUTHOR OWN THE PATENT FOR IMAGE ANALYZING SOFTWARE FOR UBM.), GRANTS (ALCON, NOVARTIS), LECTURE FEES (ALCON, HOYA, NOVARTIS, OTSUKA, PFIZER, SANTEN, SCAMPO, SENJU, TOMEY); Y. ARAKAKI, LECTURE FEES (ALCON, KOWA, OTSUKA); M. YONAHARA, NONE; T. KAIYA, LECTURE FEES (ALCON, CHUO SANGIO, HOYA, SANTEN).	FS0JF	ULTRASOUND BIOMICROSCOPY; IRIS PARAMETERS; DARK CHANGES; GLAUCOMA; LIGHT; CLOSURE; POPULATION; PREVALENCE	1	JPN J OPHTHALMOL	JPN. J. OPHTHALMOL.	ENGLISH	24			CHIYODA FIRST BLDG EAST, 3-8-1 NISHI-KANDA, CHIYODA-KU, TOKYO, 101-0065, JAPAN	JAN	6	TOKYO	29094326	J	SPRINGER JAPAN KK	2018		SAKAI, H (CORRESPONDING AUTHOR), UNIV RYUKYUS, OPHTHALMOL, 207 UEHARA, NISHIHARA, OKINAWA 9030215, JAPAN.	OPHTHALMOLOGY			0021-5155	JAPANESE JOURNAL OF OPHTHALMOLOGY
ANG M;BASKARAN M;WERKMEISTER RM;CHUA J;SCHMIDL D;DOS SANTOS VA;GARHÖFER G;MEHTA JS;SCHMETTERER L	ANG, MARCUS;BASKARAN, MANI;WERKMEISTER, RENE M.;CHUA, JACQUELINE;SCHMIDL, DOREEN;DOS SANTOS, VALENTIN ARANHA;GARHOEFER, GERHARD;MEHTA, JODHBIR S.;SCHMETTERER, LEOPOLD	ABLAMOWICZ AF, 2016, OCUL SURF, V14, P331, DOI 10.1016/J.JTOS.2016.03.003;ABOU SHOUSHA M, 2011, OPHTHALMOLOGY, V118, P1531, DOI 10.1016/J.OPHTHA.2011.01.005;AKIBA M, 2007, J BIOMED OPT, V12, DOI 10.1117/1.2764461;AKIYAMA R, 2015, CORNEA, V34, PS115, DOI 10.1097/ICO.0000000000000583;AKIYAMA-FUKUDA R, 2016, CORNEA, V35, P654, DOI 10.1097/ICO.0000000000000807;ANG GS, 2011, J GLAUCOMA, V20, P577, DOI…	OPTICAL COHERENCE TOMOGRAPHY (OCT) PROVIDES NON-CONTACT, RAPID IN VIVO IMAGING OF OCULAR STRUCTURES, AND HAS BECOME A KEY PART OF EVALUATING THE ANTERIOR SEGMENT OF THE EYE. OVER THE YEARS, IMPROVEMENTS TO TECHNOLOGY HAVE INCREASED THE SPEED OF CAPTURE AND RESOLUTION OF IMAGES, LEADING TO THE INCREASING IMPACT OF ANTERIOR SEGMENT OCT IMAGING ON CLINICAL PRACTICE. IN THIS REVIEW, WE SUMMARIZE THE …				132	SINGAPORE NATL EYE CTR, SINGAPORE EYE RES INST, SINGAPORE, SINGAPORE.; DUKE NUS MED SCH, OPHTHALMOL & VISUAL SCI ACAD CLIN PROGRAM, SINGAPORE, SINGAPORE.; MOORFIELDS EYE HOSP, LONDON, ENGLAND.; MED UNIV VIENNA, CTR MED PHYS & BIOMED ENGN, VIENNA, AUSTRIA.; MED UNIV VIENNA, CHRISTIAN DOPPLER LAB OCULAR & DERMAL EFFECTS THI, VIENNA, AUSTRIA.; MED UNIV VIENNA, DEPT CLIN PHARMACOL, VIENNA, AUSTRIA.; …	NATIONAL UNIVERSITY OF SINGAPORE; SINGAPORE NATIONAL EYE CENTER; NATIONAL UNIVERSITY OF SINGAPORE; UNIVERSITY OF LONDON; UNIVERSITY COLLEGE LONDON; MOORFIELDS EYE HOSPITAL NHS FOUNDATION TRUST; MEDICAL UNIVERSITY OF VIENNA; MEDICAL UNIVERSITY OF VIENNA; MEDICAL UNIVERSITY OF VIENNA; NANYANG TECHNOLOGICAL UNIVERSITY					2024-02-18	OPTICAL COHERENCE TOMOGRAPHY; CORNEA; GLAUCOMA; ANTERIOR SEGMENT; ANGIOGRAPHY	10.1016/j.preteyeres.2018.04.002	REVIEW			1873-1635	LEOPOLD.SCHMETTERER@SERI.COM.SG	156				GW6ZN	TEAR FILM THICKNESS; AUTOMATED ENDOTHELIAL KERATOPLASTY; ANGLE-CLOSURE SUSPECTS; AXIAL RESOLUTION OCT; IN-VIVO; DRY-EYE; ULTRAHIGH-RESOLUTION; CHAMBER ANGLE; HIGH-SPEED; LAMELLAR KERATOPLASTY		PROG RETIN EYE RES	PROG. RETIN. EYE RES.	ENGLISH	328	HYBRID	WERKMEISTER, RENE/0000-0002-5147-5714; SCHMETTERER, LEOPOLD/0000-0002-7189-1707; SCHMIDL, DOREEN/0000-0001-5664-7768	THE BOULEVARD, LANGFORD LANE, KIDLINGTON, OXFORD OX5 1GB, ENGLAND	SEP	25	OXFORD	29635068	J	PERGAMON-ELSEVIER SCIENCE LTD	2018	MANI, BASKARAN/GWZ-8299-2022; ANG, MARCUS TECK MENG/D-2239-2010	SCHMETTERER, L (CORRESPONDING AUTHOR), THE ACADEMIA, LEVEL 6,20 COLL RD,DISCOVERY TOWER, SINGAPORE 169856, SINGAPORE.	OPHTHALMOLOGY			1350-9462	PROGRESS IN RETINAL AND EYE RESEARCH
SHAN J;DEBOER C;XU BY	SHAN, JING;DEBOER, CHARLES;XU, BENJAMIN Y.	ABDELAZEEM K, 2019, CORNEA, V38, P93, DOI 10.1097/ICO.0000000000001773;ABOU SHOUSHA M, 2013, OPHTHALMOLOGY, V120, P883, DOI 10.1016/J.OPHTHA.2012.10.025;AKIL H, 2017, CAN J OPHTHALMOL, V52, P166, DOI 10.1016/J.JCJO.2016.08.019;ANG M, 2018, PROG RETIN EYE RES, V66, P132, DOI 10.1016/J.PRETEYERES.2018.04.002;ANONYMOUS, 2018, CLIN EXP OPTOM;APTEL F, 2014, J REFRACT SURG, V30, P354, DOI 10.3928/10815…	ANTERIOR SEGMENT OPTICAL COHERENCE TOMOGRAPHY (AS-OCT) IS A NON-CONTACT IMAGING TECHNIQUE THAT PRODUCES HIGH-RESOLUTION IMAGES AND QUANTITATIVE MEASUREMENTS OF THE ANTERIOR SEGMENT AND ITS ANATOMICAL STRUCTURES. THERE HAS BEEN RAPID DEVELOPMENT OF OCT TECHNOLOGY OVER THE PAST 2 DECADES, WITH THE TRANSITION FROM TIME-DOMAIN TO FOURIER-DOMAIN OCT DEVICES. BY INTEGRATING THESE ADVANCEMENTS IN OCT TE…				146	UNIV SOUTHERN CALIF, KECK SCH MED, DEPT OPHTHALMOL, USC ROSKI EYE INST, LOS ANGELES, CA 90033 USA.;	UNIVERSITY OF SOUTHERN CALIFORNIA					2024-02-18	ANTERIOR SEGMENT; IMAGING; OPTICAL COHERENCE TOMOGRAPHY	10.22608/APO.201910	REVIEW			2162-0989	BENJAMIN.XU@MED.USC.EDU	157		NATIONAL EYE INSTITUTE, NATIONAL INSTITUTE OF HEALTH, BETHESDA, MARYLAND [K23 EY029763]; RESEARCH TO PREVENT BLINDNESS, NEW YORK, NY, UNITED STATES	SUPPORTED BY THE K23 EY029763 FROM THE NATIONAL EYE INSTITUTE, NATIONAL INSTITUTE OF HEALTH, BETHESDA, MARYLAND; AND UNRESTRICTED GRANT FROM RESEARCH TO PREVENT BLINDNESS, NEW YORK, NY, UNITED STATES.	JT1SV	CHAMBER ANGLE MEASUREMENTS; INTRAOCULAR-PRESSURE; RISK-FACTOR; QUANTITATIVE ASSESSMENT; PUPIL-DILATION; NARROW ANGLES; CLOSURE; CORNEAL; EYES; REPRODUCIBILITY	2	ASIA-PAC J OPHTHALMO	ASIA-PAC. J. OPHTHALMOL.	ENGLISH	86	GOLD, GREEN ACCEPTED		4-F, HONG KONG EYE HOSP, 147K ARGYLE ST, KOWLOON, KOWLOON, HONG KONG 00000, PEOPLES R CHINA	MAR-APR	12	KOWLOON	31020820	J	ASIA-PACIFIC ACAD OPHTHALMOLOGY-APAO	2019		XU, BY (CORRESPONDING AUTHOR), UNIV SOUTHERN CALIF, DEPT OPHTHALMOL, KECK SCH MED, 1450 SAN PABLO ST,4TH FLOOR,SUITE 4700, LOS ANGELES, CA 90033 USA.	OPHTHALMOLOGY				ASIA-PACIFIC JOURNAL OF OPHTHALMOLOGY
NONGPIUR ME;TUN TA;AUNG T	NONGPIUR, MONISHA E.;TUN, TIN A.;AUNG, TIN	ALSBIRK P H, 1994, UGESKR LAEGER, V156, P5117;ANG BCH, 2016, CLIN EXP OPHTHALMOL, V44, P159, DOI 10.1111/CEO.12673;ANG GS, 2010, CLIN EXP OPHTHALMOL, V38, P778, DOI 10.1111/J.1442-9071.2010.02360.X;ANGMO D, 2019, INDIAN J OPHTHALMOL, V67, P500, DOI 10.4103/IJO.IJO_641_18;APTEL F, 2010, OPHTHALMOLOGY, V117, PC, DOI 10.1016/J.OPHTHA.2009.10.030;BAEK S, 2013, INVEST OPHTH VIS SCI, V54, P848, DOI 10.…	PRIMARY ANGLE CLOSURE DISEASE (PACD) COVERS A SPECTRUM THAT INCLUDES PRIMARY ANGLE CLOSURE SUSPECT, PRIMARY ANGLE CLOSURE, PRIMARY ANGLE CLOSURE GLAUCOMA, AND ACUTE PRIMARY ANGLE CLOSURE. ACCUMULATING EVIDENCE SUGGESTS THAT THE PATHOGENESIS OF PACD IS COMPLEX, WITH MULTIPLE CONTRIBUTORY FACTORS INCLUDING VARIATIONS IN THE ANATOMIC OR BIOMETRIC CHARACTERISTICS OF THE ANGLE SEGMENT STRUCTURES. ADVA…				60	SINGAPORE NATL EYE CTR, SINGAPORE EYE RES INST, SINGAPORE, SINGAPORE.; DUKE NUS MED SCH, SINGAPORE, SINGAPORE.; NATL UNIV SINGAPORE, YONG LOO LIN SCH MED, DEPT OPHTHALMOL, SINGAPORE, SINGAPORE.;	SINGAPORE NATIONAL EYE CENTER; NATIONAL UNIVERSITY OF SINGAPORE; NATIONAL UNIVERSITY OF SINGAPORE; NATIONAL UNIVERSITY OF SINGAPORE					2024-02-18	PRIMARY ANGLE CLOSURE DISEASE; ANTERIOR SEGMENT OPTICAL COHERENCE TOMOGRAPHY; SWEPT-SOURCE OCT	10.1097/IJG.0000000000001355	REVIEW			1536-481X	MONISHA.ESTHER.NONGPIUR@SERI.COM.SG	66		NATIONAL MEDICAL RESEARCH COUNCIL, SINGAPORE [NMRC/STAR/0023/2014]	SUPPORTED BY NATIONAL MEDICAL RESEARCH COUNCIL, SINGAPORE (NMRC/STAR/0023/2014).	KB6NM	LASER PERIPHERAL IRIDOTOMY; ULTRASOUND BIOMICROSCOPY; INTRAOCULAR-PRESSURE; CHAMBER ANGLE; DIABETIC-RETINOPATHY; LONGITUDINAL CHANGES; NARROW ANGLES; IN-VIVO; EYES; GLAUCOMA	1	J GLAUCOMA	J. GLAUCOMA	ENGLISH	71			TWO COMMERCE SQ, 2001 MARKET ST, PHILADELPHIA, PA 19103 USA	JAN	7	PHILADELPHIA	31490798	J	LIPPINCOTT WILLIAMS & WILKINS	2020	TIN, AUNG/B-6521-2009; TUN, TIN A/ABA-8732-2020	NONGPIUR, ME (CORRESPONDING AUTHOR), SINGAPORE EYE RES INST, THE ACAD, 20 COLL RD,DISCOVERY TOWER LEVEL 6, SINGAPORE 169856, SINGAPORE.	OPHTHALMOLOGY			1057-0829	JOURNAL OF GLAUCOMA
LEE KS;SUNG KR;KANG SY;CHO JW;KIM DY;KOOK MS	LEE, KYOUNG SUB;SUNG, KYUNG RIM;KANG, SUNG YONG;CHO, JUNG WOO;KIM, DONG YOON;KOOK, MICHAEL S.	ALSAGOFF Z, 2000, OPHTHALMOLOGY, V107, P2300, DOI 10.1016/S0161-6420(00)00385-7;ANG LPK, 2000, OPHTHALMOLOGY, V107, P2092, DOI 10.1016/S0161-6420(00)00360-2;ARTES PH, 2005, INVEST OPHTH VIS SCI, V46, P4600, DOI 10.1167/IOVS.05-0827;AUNG T, 2001, AM J OPHTHALMOL, V131, P7, DOI 10.1016/S0002-9394(00)00621-8;FOSTER PJ, 2002, BRIT J OPHTHALMOL, V86, P238, DOI 10.1136/BJO.86.2.238;FOSTER PJ, 2000, BRI…	TO STUDY QUANTITATIVE CHANGES IN ANTERIOR CHAMBER ANGLE (ACA) AFTER LASER PERIPHERAL IRIDOTOMY (LPI) IN NARROW-ANGLE EYES USING ANTERIOR SEGMENT OPTICAL COHERENCE TOMOGRAPHY (AS-OCT). EIGHTEEN SUBJECTS WITH NARROW ANGLES WERE IMAGED WITH AS-OCT FOR DETERMINING TEST-RETEST VARIABILITY. FORTY-SIX PARTICIPANTS WITH NARROW ANGLES WERE SCANNED WITH AS-OCT BEFORE LPI AND 4 WEEKS AFTER LPI. THE PRESENCE…				213	UNIV ULSAN, ASAN MED CTR, COLL MED, DEPT OPHTHALMOL, SEOUL 138736, SOUTH KOREA.;	UNIVERSITY OF ULSAN; ASAN MEDICAL CENTER					2024-02-18	ANTERIOR SEGMENT OCT; ANTERIOR CHAMBER ANGLE; LASER PERIPHERAL IRIDOTOMY	10.1007/s10384-011-0009-3	ARTICLE				MSKOOK@AMC.SEOUL.KR	219				778XI	FIBER LAYER THICKNESS; ASIAN EYES; GLAUCOMA; POPULATION; PREVALENCE; GONIOSCOPY; DEPTH	3	JPN J OPHTHALMOL	JPN. J. OPHTHALMOL.	ENGLISH	23			1-11-11 KUDAN-KITA, CHIYODA-KU, TOKYO, 102-0073, JAPAN	MAY	7	TOKYO	21559907	J	SPRINGER TOKYO	2011		KOOK, MS (CORRESPONDING AUTHOR), UNIV ULSAN, ASAN MED CTR, COLL MED, DEPT OPHTHALMOL, 388-1 PUNGNAP 2 DONG, SEOUL 138736, SOUTH KOREA.	OPHTHALMOLOGY			0021-5155	JAPANESE JOURNAL OF OPHTHALMOLOGY
ROSENBLUM H;RADCLIFFE N	ROSENBLUM, HANNAH;RADCLIFFE, NATHAN	BECKER B, 1965, DIAGNOSIS THERAPY GL, P42;BITRIAN E, 2010, AM J OPHTHALMOL, V150, P82, DOI 10.1016/J.AJO.2010.02.009;BROWN RH, 1986, ARCH OPHTHALMOL-CHIC, V104, P1464;CASHWELL LF, 1992, OPHTHALMOLOGY, V99, P651;CASHWELL LF, 1992, OPHTHALMOLOGY, V99, P658;CONGDON NG, 1999, OPHTHALMOLOGY, V106, P2161, DOI 10.1016/S0161-6420(99)90499-2;CRAIG JE, 2004, AM J OPHTHALMOL, V137, P193, DOI 10.1016/S0002-9…	THIS IS A CASE-BASED APPROACH TO THE DIAGNOSIS AND MANAGEMENT OF ANGLE CLOSURE GLAUCOMA OF A VARIETY OF CAUSATIVE FACTORS, WITH A SPECIAL EMPHASIS ON THE USE OF ADVANCED ANTERIOR SEGMENT IMAGING INCLUDING ULTRASOUND BIOMICROSCOPY AND ANTERIOR SEGMENT OPTICAL COHERENCE TOMOGRAPHY. ALTHOUGH ALL ANGLE CLOSURE IS CAUSED BY IRIDOTRABECULAR CONTACT, THE CAUSE OF ANGLE CLOSURE GLAUCOMA IS CLASSIFIED BAS…				512	NYU, SCH MED, NEW YORK, NY 10016 USA.;	NEW YORK UNIVERSITY					2024-02-18		10.1016/j.jcjo.2014.10.004	ARTICLE			1715-3360	NATHAN.RADCLIFFE@NYUMC.ORG	518		SETH SPRAGUE EDUCATIONAL & CHARITABLE FOUNDATION; RESEARCH TO PREVENT BLINDNESS	THIS WORK WAS SUPPORTED BY THE SETH SPRAGUE EDUCATIONAL & CHARITABLE FOUNDATION AND BY RESEARCH TO PREVENT BLINDNESS.	AU2NN	PLATEAU IRIS SYNDROME; PSEUDOPHAKIC MALIGNANT GLAUCOMA; OPTICAL COHERENCE TOMOGRAPHY; LASER IRIDOTOMY; ULTRASOUND BIOMICROSCOPY; CHAMBER ANGLE; ASIAN EYES; MANAGEMENT; IRIDOPLASTY; DEFINITION	6	CAN J OPHTHALMOL	CAN. J. OPTHALMOL.-J. CAN. OPTHALMOL.	ENGLISH	41		RADCLIFFE, NATHAN/0000-0003-3976-6831	1525 CARLING AVE SUITE 610, OTTAWA, ONTARIO K1Z 8R9, CANADA	DEC	7	OTTAWA	25433740	J	CANADIAN OPHTHAL SOC	2014		RADCLIFFE, N (CORRESPONDING AUTHOR), NYU, SCH MED, DEPT OPHTHALMOL, 240 EAST 38TH ST,18TH FLOOR, NEW YORK, NY 10016 USA.	OPHTHALMOLOGY			0008-4182	CANADIAN JOURNAL OF OPHTHALMOLOGY-JOURNAL CANADIEN D OPHTALMOLOGIE
CIANCAGLINI M;CARPINETO P;AGNIFILI L;NUBILE M;LANZINI M;FASANELLA V;MASTROPASQUA L	CIANCAGLINI, MARCO;CARPINETO, PAOLO;AGNIFILI, LUCA;NUBILE, MARIO;LANZINI, MANUELA;FASANELLA, VINCENZO;MASTROPASQUA, LEONARDO	ADDICKS EM, 1983, ARCH OPHTHALMOL-CHIC, V101, P795;BENEDIKT O, 1977, KLIN MONATSBL AUGENH, V170, P10;CANTOR LB, 2003, J GLAUCOMA, V12, P266, DOI 10.1097/00061198-200306000-00015;EDMUNDS B, 2004, OPHTHALMOLOGY, V111, P97, DOI 10.1016/J.OPHTHA.2003.04.005;GALIN MA, 1966, AM J OPHTHALMOL, V61, P63, DOI 10.1016/0002-9394(66)90748-3;GUTHOFF R, 2006, J GLAUCOMA, V15, P552, DOI 10.1097/01.IJG.0000212295…	PURPOSE: TO PROVIDE A MICROSCOPIC AND MACROSCOPIC ANALYSIS BY A CLINICAL, IN VIVO CONFOCAL MICROSCOPY (IVCM) AND ANTERIOR SEGMENT OPTICAL COHERENCE TOMOGRAPHY (AS-OCT) ASSESSMENT OF FILTERING BLEBS AFTER GLAUCOMA SURGERY. MATERIAL AND METHODS: WE RETROSPECTIVELY ANALYZED 60 EYES OF 48 GLAUCOMATOUS PATIENTS BY SLIT-LAMP, IVCM, AND AS-OCT EXAMINATIONS. PATIENTS WERE DIVIDED INTO 2 GROUPS: SUCCESSFU…				308	UNIV G DANNUNZIO, DEPT MED & AGING SCI, OPHTHALM CLIN, PESCARA, ITALY.;	G D'ANNUNZIO UNIVERSITY OF CHIETI-PESCARA					2024-02-18	FILTERING BLEBS; TRABECULECTOMY; CONFOCAL MICROSCOPY; ANTERIOR SEGMENT OCT	10.1097/IJG.0b013e31815c3a19	ARTICLE			1536-481X	M.CIANCAGLINI@UNICH.IT	317				317FJ	GLAUCOMA FILTRATION SURGERY; MITOMYCIN-C; TRABECULECTOMY; OPERATIONS; MECHANISM	4	J GLAUCOMA	J. GLAUCOMA	ENGLISH	20		CIANCAGLINI, MARCO/0000-0001-5888-7976	TWO COMMERCE SQ, 2001 MARKET ST, PHILADELPHIA, PA 19103 USA	JUN-JUL	10	PHILADELPHIA	18552617	J	LIPPINCOTT WILLIAMS & WILKINS	2008	CARPINETO, PAOLO/AAN-9688-2020	CIANCAGLINI, M (CORRESPONDING AUTHOR), PIAZZA RINASCITA 79, I-65122 PESCARA, ITALY.	OPHTHALMOLOGY			1057-0829	JOURNAL OF GLAUCOMA
MITRA A;RAMAKRISHNAN R;KADER MA	MITRA, ARIJIT;RAMAKRISHNAN, R.;KADER, MOHIDEEN ABDUL	BANTA JT, 2001, AM J OPHTHALMOL, V132, P112, DOI 10.1016/S0002-9394(01)01013-3;BOVINO JA, 1982, AM J OPHTHALMOL, V94, P99, DOI 10.1016/0002-9394(82)90199-4;CHEN TC, 2003, BRIT J OPHTHALMOL, V87, P648, DOI 10.1136/BJO.87.5.648;FRAUNFELDER FW, 2004, OPHTHALMOLOGY, V111, P109, DOI 10.1016/J.OPHTHA.2003.04.004;LIN J, 2003, J AAPOS, V7, P66, DOI 10.1016/S1091-8531(02)42006-X;RHEE DJ, 2001, ARCH OPHTHA…	WE PRESENT A CASE REPORT OF A 31-YEAR-OLD FEMALE PATIENT WHO PRESENTED TO US WITH A 1 DAY HISTORY OF ACUTE BILATERAL EYE PAIN, BLURRED VISION AND HEADACHE. SHE WAS FOUND TO HAVE A MYOPIC SHIFT, RAISED INTRAOCULAR PRESSURE (IOP) AND SHALLOW ANTERIOR CHAMBERS IN BOTH EYES. SHE HAD BEEN COMMENCED ON ORAL TOPIRAMATE 1 WEEK PREVIOUSLY. A NUMBER OF INVESTIGATIONS, INCLUDING ANTERIOR SEGMENT OPTICAL COH…				619	ARAVIND EYE HOSP, ARAVIND ZIESS CTR EXCELLENCE GLAUCOMA, DEPT GLAUCOMA, TIRUNELVELI 627001, TAMIL NADU, INDIA.; POSTGRAD INST OPHTHALMOL, TIRUNELVELI 627001, TAMIL NADU, INDIA.;						2024-02-18	ANTERIOR SEGMENT OPTICAL COHERENCE TOMOGRAPHY; ANGLE OPENING DISTANCE; ANGLE RECESS AREA; MYOPIC SHIFT; SHALLOW ANTERIOR CHAMBER; TOPIRAMATE INDUCED BILATERAL ACUTE ANGLE CLOSURE; TRABECULAR IRIS SPACE AREA	10.4103/0301-4738.129784	ARTICLE			1998-3689	JEET2712@YAHOO.CO.IN	622				AZ9WG	GLAUCOMA; MYOPIA	5	INDIAN J OPHTHALMOL	INDIAN J. OPHTHALMOL.	ENGLISH	10	GREEN PUBLISHED, GOLD		B-9, KANARA BUSINESS CENTRE, OFF LINK RD, GHAKTOPAR-E, MUMBAI, 400075, INDIA	MAY	4	MUMBAI	24881612	J	MEDKNOW PUBLICATIONS & MEDIA PVT LTD	2014		MITRA, A (CORRESPONDING AUTHOR), ARAVIND EYE HOSP, ARAVIND ZIESS CTR EXCELLENCE GLAUCOMA, TIRUNELVELI 627001, TAMIL NADU, INDIA.	OPHTHALMOLOGY			0301-4738	INDIAN JOURNAL OF OPHTHALMOLOGY
KOKUBUN T;KUNIKATA H;TSUDA S;HIMORI N;MARUYAMA K;NAKAZAWA T	KOKUBUN, TAIKI;KUNIKATA, HIROSHI;TSUDA, SATORU;HIMORI, NORIKO;MARUYAMA, KAZUICHI;NAKAZAWA, TORU	ADDICKS EM, 1983, ARCH OPHTHALMOL-CHIC, V101, P795;ALWITRY A, 2007, J GLAUCOMA, V16, P616, DOI 10.1097/IJG.0B013E31805D014A;AUGUSTINUS C J, 2012, BULL SOC BELGE OPHTALMOL, P51;AVITABILE T., 1998, OPHTHALMOLOGICA, V212, P17, DOI 10.1159/000055414;CAIRNS JE, 1971, T AM ACAD OPHTHALMOL, V75, P1395;CAPRIOLI J, 1996, TRANS AM OPHTHALMOL SOC, V94, P451;CHEN CW, 1983, TRANS ASIA PACIF ACAD OPHTHALMOL, V…	BACKGROUNDTHE AIM OF THE STUDY IS TO DETERMINE THE RELATIONSHIP BETWEEN POST-TRABECULECTOMY BLEB STRUCTURE EVALUATED USING ANTERIOR SEGMENT OPTICAL COHERENCE TOMOGRAPHY (AS-OCT) AND POSTOPERATIVE INTRAOCULAR PRESSURE (IOP). DESIGNRRETROSPECTIVE IS SHOWED FOR THE DESIGN OF THIS STUDY. PARTICIPANTSTHERE ARE TWENTY-SEVEN EYES OF 27 TRABECULECTOMY PATIENTS. METHODSWE DREW CONTOUR LINES FOR THE BLEB A…				446	TOHOKU UNIV, DEPT OPHTHALMOL, GRAD SCH MED, SENDAI, MIYAGI 9808574, JAPAN.; TOHOKU UNIV, RETINAL DIS CONTROL, GRAD SCH MED, SENDAI, MIYAGI 9808574, JAPAN.; TOHOKU UNIV, DEPT ADV OPHTHALM MED, GRAD SCH MED, SENDAI, MIYAGI 9808574, JAPAN.;	TOHOKU UNIVERSITY; TOHOKU UNIVERSITY; TOHOKU UNIVERSITY					2024-02-18	ANTERIOR SEGMENT OPTICAL COHERENCE TOMOGRAPHY; FILTERING BLEB; GLAUCOMA; INTRAOCULAR PRESSURE; TRABECULECTOMY	10.1111/ceo.12689	ARTICLE			1442-9071	NTORU@OPH.MED.TOHOKU.AC.JP	454		JST GRANT FROM JSPS KAKENHI [26293372]	THIS PAPER WAS SUPPORTED IN PART BY A JST GRANT FROM JSPS KAKENHI GRANTS-IN-AID FOR SCIENTIFIC RESEARCH (B) (T.N. 26293372). THE FUNDER HAD NO ROLE IN DESIGN AND CONDUCT OF THE STUDY; COLLECTION, MANAGEMENT, ANALYSIS AND INTERPRETATION OF THE DATA; PREPARATION, REVIEW OR APPROVAL OF THE MANUSCRIPT; OR THE DECISION TO SUBMIT THE MANUSCRIPT FOR PUBLICATION.	DS4CH	POSTOPERATIVE INTRAOCULAR-PRESSURE; MITOMYCIN-C; ULTRASOUND BIOMICROSCOPY; TRABECULECTOMY BLEBS; LENS IMPLANTATION; GLAUCOMA; PHACOEMULSIFICATION; EYES	6	CLIN EXP OPHTHALMOL	CLIN. EXP. OPHTHALMOL.	ENGLISH	47		MARUYAMA, KAZUICHI/0000-0001-6283-5466	111 RIVER ST, HOBOKEN 07030-5774, NJ USA	AUG	9	HOBOKEN	27452223	J	WILEY	2016	MARUYAMA, KAZUICHI/GRX-8129-2022	NAKAZAWA, T (CORRESPONDING AUTHOR), TOHOKU UNIV, DEPT OPHTHALMOL, GRAD SCH MED, AOBA KU, 1-1 SEIRYO MACHI, SENDAI, MIYAGI 9808574, JAPAN.	OPHTHALMOLOGY			1442-6404	CLINICAL AND EXPERIMENTAL OPHTHALMOLOGY
FU HZ;XU YW;LIN S;ZHANG XQ;WONG DWK;LIU J;FRANGI AF;BASKARAN M;AUNG T	FU, HUAZHU;XU, YANWU;LIN, STEPHEN;ZHANG, XIAOQIN;WONG, DAMON WING KEE;LIU, JIANG;FRANGI, ALEJANDRO F.;BASKARAN, MANI;AUNG, TIN	ALEFS B, 2007, 2007 IEEE INTELLIGENT VEHICLES SYMPOSIUM, VOLS 1-3, P249;ALJABAR P, 2009, NEUROIMAGE, V46, P726, DOI 10.1016/J.NEUROIMAGE.2009.02.018;ANONYMOUS, J BIOMEDICAL OPTICS;BAGCI AM, 2008, AM J OPHTHALMOL, V146, P679, DOI 10.1016/J.AJO.2008.06.010;BERGTHOLDT MARTIN, 2010, INTERNATIONAL JOURNAL OF COMPUTER VISION, V87, P93, DOI 10.1007/S11263-009-0209-1;CAO XC, 2016, IEEE T NEUR NET LEAR, V…	ANGLE-CLOSURE GLAUCOMA IS A MAJOR CAUSE OF IRREVERSIBLE VISUAL IMPAIRMENT AND CAN BE IDENTIFIED BY MEASURING THE ANTERIOR CHAMBER ANGLE (ACA) OF THE EYE. THE ACA CAN BE VIEWED CLEARLY THROUGH ANTERIOR SEGMENT OPTICAL COHERENCE TOMOGRAPHY (AS-OCT), BUT THE IMAGING CHARACTERISTICS AND THE SHAPES AND LOCATIONS OF MAJOR OCULAR STRUCTURES CAN VARY SIGNIFICANTLY AMONG DIFFERENT AS-OCT MODALITIES, THUS …				1930	ASTAR, INST INFOCOMM RES, OCULAR IMAGING DEPT, SINGAPORE 138632, SINGAPORE.; MICROSOFT RES, BEIJING 100080, PEOPLES R CHINA.; WENZHOU UNIV, COLL MATH & INFORMAT SCI, WENZHOU 325027, PEOPLES R CHINA.; CHINESE ACAD SCI, NINGBO INST MAT TECHNOL & ENGN, CIXI INST BIOMED ENGN, BEIJING 315201, PEOPLES R CHINA.; UNIV SHEFFIELD, ELECT & ELECT ENGN DEPT, CISTIB CTR COMPUTAT IMAGING & SIMULAT TECHNOL BIO, …	AGENCY FOR SCIENCE TECHNOLOGY & RESEARCH (A*STAR); A*STAR - INSTITUTE FOR INFOCOMM RESEARCH (I2R); MICROSOFT; WENZHOU UNIVERSITY; CHINESE ACADEMY OF SCIENCES; NINGBO INSTITUTE OF MATERIALS TECHNOLOGY AND ENGINEERING, CAS; UNIVERSITY OF SHEFFIELD; NATIONAL UNIVERSITY OF SINGAPORE; SINGAPORE NATIONAL EYE CENTER; SINGAPORE NATIONAL EYE CENTER; NATIONAL UNIVERSITY OF SINGAPORE; NATIONAL UNIVERSITY OF…					2024-02-18	DATA-DRIVEN; SEGMENTATION; AS-OCT; ANTERIOR CHAMBER ANGLE; ANGLE-CLOSURE GLAUCOMA	10.1109/TMI.2017.2703147	ARTICLE			1558-254X	FUHZ@I2R.A-STAR.EDU.SG; YAXU@I2R.A-STAR.EDU.SG; STEVELIN@MICROSOFT.COM; XQZHANG@WZU.EDU.CN; WKWONGG@I2R.A-STAR.EDU.SG; JIMMYLIU@NIMTE.AC.CN; A.FRANGI@SHEFFIELD.AC.UK; BASKARAN.MANI@SERI.COM.SG; AUNG.TIN@SNEC.COM.SG	1938		BEP [1521480034]; NSFC [61511130084]	THIS WORK WAS SUPPORTED IN PART BY BEP UNDER GRANT 1521480034 AND IN PART BY NSFC UNDER GRANT 61511130084.	FF6QC	OPTICAL COHERENCE TOMOGRAPHY; ORIENTED GRADIENTS; NARROW ANGLES; IMAGES; CLASSIFICATION; ASSOCIATION; HISTOGRAMS	9	IEEE T MED IMAGING	IEEE TRANS. MED. IMAGING	ENGLISH	42	GREEN ACCEPTED	FRANGI, ALEJANDRO F/0000-0002-2675-528X; LIU, JIANG JIMMY/0000-0001-6281-6505; XU, YANWU/0000-0002-1779-931X; FU, HUAZHU/0000-0002-9702-5524; WONG, DAMON/0000-0003-4601-9121	445 HOES LANE, PISCATAWAY, NJ 08855-4141 USA	SEP	9	PISCATAWAY	28499992	J	IEEE-INST ELECTRICAL ELECTRONICS ENGINEERS INC	2017	FRANGI, ALEJANDRO F/C-6500-2008; MANI, BASKARAN/GWZ-8299-2022; LIU, JIANG JIMMY/AHB-8921-2022; XU, YANWU/AAK-8156-2020; FU, HUAZHU/A-1411-2014; WANG, MENG/ITR-8699-2023; TIN, AUNG/B-6521-2009; WONG, DAMON/JCE-8444-2023	XU, YW (CORRESPONDING AUTHOR), ASTAR, INST INFOCOMM RES, OCULAR IMAGING DEPT, SINGAPORE 138632, SINGAPORE.	COMPUTER SCIENCE; ENGINEERING; IMAGING SCIENCE & PHOTOGRAPHIC TECHNOLOGY; RADIOLOGY, NUCLEAR MEDICINE & MEDICAL IMAGING			0278-0062	IEEE TRANSACTIONS ON MEDICAL IMAGING
LIU L	LIU, LANCE	ANONYMOUS, 2006, ANGLE CLOSURE ANGLE;AUNG T, 2005, ARCH OPHTHALMOL-CHIC, V123, P527, DOI 10.1001/ARCHOPHT.123.4.527;BARKANA Y, 2007, ARCH OPHTHALMOL-CHIC, V125, P1331, DOI 10.1001/ARCHOPHT.125.10.1331;DUNCAN G, 1997, BRIT J OPHTHALMOL, V81, P818, DOI 10.1136/BJO.81.10.818;FOSTER PJ, 2000, BRIT J OPHTHALMOL, V84, P186, DOI 10.1136/BJO.84.2.186;FREMONT AM, 2003, ARCH OPHTHALMOL-CHIC, V121, P777, DO…	OBJECTIVE: TO EXAMINE THE ANATOMICAL CHANGES OF THE ANTERIOR CHAMBER ANGLE IN THE EYES OF WHITE PATIENTS USING ANTERIOR-SEGMENT OPTICAL COHERENCE TOMOGRAPHY. METHOD: AN OBSERVATIONAL STUDY OF 122 WHITE PATIENTS WAS PERFORMED TO EXAMINE THE CHANGES OF THE IRIS AND THE ANTERIOR ANGLE CHAMBER USING ANTERIOR-SEGMENT OPTICAL COHERENCE TOMOGRAPHY. IMAGES WERE COMPARED BETWEEN HEALTHY EYES OF DIFFERENT …				1682	PRESTON EYE CLIN, PRESTON, VIC 3072, AUSTRALIA.;						2024-02-18		10.1001/archopht.126.12.1682	ARTICLE			1538-3601	DRLSLIU@HOTMAIL.COM	1686				380RA	GLAUCOMA; CLOSURE; GONIOSCOPY; PREVALENCE; AUSTRALIA; PATTERNS; DEPTH; LIGHT; EYE	12	ARCH OPHTHALMOL-CHIC	ARCH. OPHTHALMOL.	ENGLISH	20			330 N WABASH AVE, STE 39300, CHICAGO, IL 60611-5885 USA	DEC	5	CHICAGO	19064849	J	AMER MEDICAL ASSOC	2008		LIU, L (CORRESPONDING AUTHOR), PRESTON EYE CLIN, 268 MURRAY RD, PRESTON, VIC 3072, AUSTRALIA.	OPHTHALMOLOGY			0003-9950	ARCHIVES OF OPHTHALMOLOGY
LI WY;CHEN Q;JIANG CH;SHI GH;DENG GH;SUN XH	LI, WANYUE;CHEN, QIAN;JIANG, CHUNHUI;SHI, GUOHUA;DENG, GUOHUA;SUN, XINGHUAI	BURLINA PM, 2017, JAMA OPHTHALMOL, V135, P1170, DOI 10.1001/JAMAOPHTHALMOL.2017.3782;CONSOLE JW, 2008, BRIT J OPHTHALMOL, V92, P1612, DOI 10.1136/BJO.2007.129932;FOSTER PJ, 2001, BRIT J OPHTHALMOL, V85, P1277, DOI 10.1136/BJO.85.11.1277;FU HZ, 2019, AM J OPHTHALMOL, V203, P37, DOI 10.1016/J.AJO.2019.02.028;FU HZ, 2020, IEEE T CYBERNETICS, V50, P3358, DOI 10.1109/TCYB.2019.2897162;HE MG, 2007, OPH…	PURPOSE: THE PURPOSE OF THIS STUDY WAS TO DEVELOP A SOFTWARE PACKAGE FOR THE AUTOMATIC CLASSIFICATION OF ANTERIOR CHAMBER ANGLE USING ANTERIOR SEGMENT OPTICAL COHERENCE TOMOGRAPHY (AS-OCT). METHODS: AS-OCT IMAGES WERE COLLECTED FROM SUBJECTS WITH OPEN, NARROW, AND CLOSURE ANTERIOR CHAMBER ANGLES, WHICH WERE GRADED BASED ON ULTRASOUND BIOMICROSCOPY (UBM) RESULTS. THE INCEPTION VERSION 3 NETWORK AN…	19				CHINESE ACAD SCI, SUZHOU INST BIOMED ENGN & TECHNOL, JIANGSU KEY LAB MED OPT, 88 KELIN RD, SUZHOU 215163, PEOPLES R CHINA.; FUDAN UNIV, EYE & ENT HOSP, EYE INST, 83 FENYANG RD, SHANGHAI 200031, PEOPLES R CHINA.; FUDAN UNIV, EYE & ENT HOSP, DEPT OPHTHALMOL, 83 FENYANG RD, SHANGHAI 200031, PEOPLES R CHINA.; FUDAN UNIV, KEY NHC KEY LAB MYOPIA, SHANGHAI, PEOPLES R CHINA.; CHINESE ACAD MED SCI, LAB MY…	CHINESE ACADEMY OF SCIENCES; SUZHOU INSTITUTE OF BIOMEDICAL ENGINEERING & TECHNOLOGY, CAS; FUDAN UNIVERSITY; FUDAN UNIVERSITY; FUDAN UNIVERSITY; CHINESE ACADEMY OF MEDICAL SCIENCES - PEKING UNION MEDICAL COLLEGE; CHINESE ACADEMY OF SCIENCES; CENTER FOR EXCELLENCE IN BRAIN SCIENCE AND INTELLIGENCE TECHNOLOGY, CAS					2024-02-18	AUTOMATIC CLASSIFICATION; ANTERIOR CHAMBER ANGLE; ANTERIOR SEGMENT OPTICAL COHERENCE TOMOGRAPHY (AS-OCT)	10.1167/tvst.10.6.19	ARTICLE				CHHJIANG70@163.COM; GHSHI_LAB@126.COM			NATIONAL KEY R&D PROGRAM OF CHINA [2017YFC0108200]; NATIONAL SCIENTIFIC INSTRUMENT AND EQUIPMENT DEVELOPMENT PROJECT [2016YFF0102000]; FRONTIER SCIENCE RESEARCH PROJECT OF THE CHINESE ACADEMY OF SCIENCES [QYZDBSSWJSC03]; JIANGSU PROVINCE SCIENCE FUND FOR DISTINGUISHED YOUNG SCHOLARS [BK20060010]; JIANGSUPROVINCE KEY RESEARCH AND DEVELOPMENT PROGRAM [BE2018667]; NATIONAL NATURAL SCIENCE FOUNDATION…	SUPPORTED BY THE NATIONAL KEY R&D PROGRAM OF CHINA (2017YFC0108200) , THE NATIONAL SCIENTIFIC INSTRUMENT AND EQUIPMENT DEVELOPMENT PROJECT (2016YFF0102000) , FRONTIER SCIENCE RESEARCH PROJECT OF THE CHINESE ACADEMY OF SCIENCES (QYZDBSSWJSC03) ; THE JIANGSU PROVINCE SCIENCE FUND FOR DISTINGUISHED YOUNG SCHOLARS (BK20060010) , THE JIANGSUPROVINCE KEY RESEARCH AND DEVELOPMENT PROGRAM (BE2018667) , A…	SL4VP	MACULAR DEGENERATION; SUSPECTS; CLOSURE	6	TRANSL VIS SCI TECHN	TRANSL. VIS. SCI. TECHNOL.	ENGLISH	26	GOLD, GREEN PUBLISHED		12300 TWINBROOK PARKWAY, ROCKVILLE, MD 20852-1606 USA	MAY	8	ROCKVILLE	34111263	J	ASSOC RESEARCH VISION OPHTHALMOLOGY INC	2021		SHI, GH (CORRESPONDING AUTHOR), CHINESE ACAD SCI, SUZHOU INST BIOMED ENGN & TECHNOL, JIANGSU KEY LAB MED OPT, 88 KELIN RD, SUZHOU 215163, PEOPLES R CHINA.; JIANG, CH (CORRESPONDING AUTHOR), FUDAN UNIV, EYE & ENT HOSP, EYE INST, 83 FENYANG RD, SHANGHAI 200031, PEOPLES R CHINA.; JIANG, CH (CORRESPONDING AUTHOR), FUDAN UNIV, EYE & ENT HOSP, DEPT OPHTHALMOL, 83 FENYANG RD, SHANGHAI 200031, PEOPLES R …	OPHTHALMOLOGY			2164-2591	TRANSLATIONAL VISION SCIENCE & TECHNOLOGY
KUDSIEH B;FERNÁNDEZ-VIGO JI;JORDANA MIC;VILA-ARTEAGA J;URCOLA JA;MORENO JMR;GARCÍA-FEIJÓO J;FERNÁNDEZ-VIGO JA	KUDSIEH, BACHAR;FERNANDEZ-VIGO, JOSE IGNACIO;CANUT JORDANA, MARIA ISABEL;VILA-ARTEAGA, JORGE;URCOLA, JAVIER ARITZ;RUIZ MORENO, JOSE MARIA;GARCIA-FEIJOO, JULIAN;ANGEL FERNANDEZ-VIGO, JOSE	ANG M, 2018, PROG RETIN EYE RES, V66, P132, DOI 10.1016/J.PRETEYERES.2018.04.002;ANH BUI THI VAN, 2019, OPEN ACCESS MACED J MED SCI, V7, P4278, DOI 10.3889/OAMJMS.2019.374;BRANDAO LM, 2013, J OPHTHALMOL, V2013, DOI 10.1155/2013/705915;CANTOR LB, 2003, J GLAUCOMA, V12, P266, DOI 10.1097/00061198-200306000-00015;CHATZARA A, 2019, SEMIN OPHTHALMOL, V34, P93, DOI 10.1080/08820538.2019.1581820;CHO HK,…	THE FORMATION OF FILTRATION BLEBS IS THE MAIN DRAINAGE MECHANISM FOR REDUCING INTRAOCULAR PRESSURE AFTER TRADITIONAL INCISIONAL GLAUCOMA SURGERY SUCH AS TRABECULECTOMY AND NON-PENETRATING DEEP SCLEROTOMY. EARLY AND SHORT-LASTING BLEBS MAY ALSO OCCUR AFTER CANALOPLASTY. BLEB FORMATION ALSO PLAYS AN IMPORTANT ROLE AFTER THE IMPLANTATION OF GLAUCOMA DRAINAGE DEVICES, INCLUDING MINIMALLY INVASIVE GLA…				E29	HOSP UNIV PUERTA DE HIERRO MAJADAHONDA, DEPT OPHTHALMOL, MADRID, SPAIN.; CTR INT OFTALMOL AVANZADA, MADRID, SPAIN.; INST INVEST SANITARIA IDISSC, HOSP CLIN SAN CARLOS, DEPT OPHTHALMOL, MADRID, SPAIN.; CTR OFTALMOL BARRAQUER, BARCELONA, SPAIN.; HOSP UNIV LA FE, DEPT OPHTHALMOL, VALENCIA, SPAIN.; INNOVA OCULAR CLIN, VALENCIA, SPAIN.; HOSP UNIV ALAVA, DEPT OPHTHALMOL, VITORIA, SPAIN.; BEGITEK MIRANZ…	HOSPITAL PUERTA DE HIERRO-MAJADAHONDA; HOSPITAL CLINICO SAN CARLOS; HOSPITAL UNIVERSITARI I POLITECNIC LA FE; UNIVERSITY HOSPITAL OF ARABA; UNIVERSIDAD DE EXTREMADURA					2024-02-18	ANTERIOR SEGMENT; BLEB MORPHOLOGY; FILTRATION BLEB; MINIMALLY INVASIVE GLAUCOMA SURGERY; OCULAR COHERENCE TOMOGRAPHY; TRABECULECTOMY	10.1111/aos.14881	REVIEW; EARLY ACCESS	MAY 2021		1755-3768	BACHARKUDSIEH@GMAIL.COM	E37				YD6LB	OPEN-ANGLE GLAUCOMA; FILTERING BLEBS; DEEP SCLERECTOMY; ULTRASOUND BIOMICROSCOPY; TRABECULECTOMY; IMPLANT; CANALOPLASTY; MORPHOLOGY; EYES; VISCOCANALOSTOMY	1	ACTA OPHTHALMOL	ACTA OPHTHALMOL.	ENGLISH	55	BRONZE	KUDSIEH, BACHAR/0000-0002-2600-8233; RUIZ-MORENO, JOSE M/0000-0001-9636-0788; URCOLA, JAVIER ARITZ/0000-0001-7084-2877; FERNANDEZ-VIGO, JOSE IGNACIO/0000-0001-8745-3464	111 RIVER ST, HOBOKEN 07030-5774, NJ USA	2022 FEB	9	HOBOKEN	33942540	J	WILEY	2022	FEIJOO, JULIAN GARCIA/G-9762-2017; FERNANDEZ-VIGO, JOSE IGNACIO/G-9779-2017	KUDSIEH, B (CORRESPONDING AUTHOR), CALLE ZURBANO 71, MADRID 28010, SPAIN.	OPHTHALMOLOGY			1755-375X	ACTA OPHTHALMOLOGICA
KIM Y;LIM SH;RHO S	KIM, YURI;LIM, SU-HO;RHO, SEUNGSOO	COHEN J, 1960, EDUC PSYCHOL MEAS, V20, P37, DOI 10.1177/001316446002000104;CUTOLO CA, 2020, J GLAUCOMA, V29, P456, DOI 10.1097/IJG.0000000000001501;DEMPSTER AG, 2011, INVEST OPHTH VIS SCI, V52, P8300, DOI 10.1167/IOVS.11-7772;DUNN OJ, 1961, J AM STAT ASSOC, V56, P52, DOI 10.2307/2282330;GEDDE SJ, 2012, AM J OPHTHALMOL, V153, P789, DOI 10.1016/J.AJO.2011.10.026;JAMPEL HD, 1992, OPHTHALMOLOGY, V99,…	PURPOSE: TO DETERMINE THE EARLY PREDICTORS OF SURGICAL SUCCESS 6 MONTHS AFTER XEN SURGERY AMONG CLINICAL PARAMETERS, INCLUDING ANTERIOR SEGMENT OPTICAL COHERENCE TOMOGRAPHY (AS-OCT). METHODS: A TOTAL OF 31 EYES WITH MEDICALLY UNCONTROLLED PRIMARY OPEN-ANGLE GLAUCOMA OR PSEUDOEXFOLIATION GLAUCOMA WAS ENROLLED RETROSPECTIVELY. USING AS-OCT, XEN TIP LOCATION WAS CATEGORIZED INTO INTRACONJUNCTIVAL, I…	26				CHA UNIV, CHA BUNDANG MED CTR, DEPT OPHTHALMOL, 59 YATAP RO, SEONGNAM SI 13496, GYEONGGI DO, SOUTH KOREA.; DAEGU VET HLTH SERV MED CTR, DEPT OPHTHALMOL, DAEGU, SOUTH KOREA.;	POCHON CHA UNIVERSITY					2024-02-18	XEN GEL STENT; INTRAOCULAR PRESSURE; GLAUCOMA; PSEUDOEXFOLIATION; ANTERIOR SEGMENT OPTICAL COHERENCE TOMOGRAPHY	10.1167/tvst.11.2.26	ARTICLE				HARRYRHO@GMAIL.COM					ZC4VU	POSTOPERATIVE INTRAOCULAR-PRESSURE; MITOMYCIN-C; GLAUCOMA; TRABECULECTOMY; IMMUNOHISTOCHEMISTRY; IMPLANTATION; OUTCOMES; MATRIX	2	TRANSL VIS SCI TECHN	TRANSL. VIS. SCI. TECHNOL.	ENGLISH	23	GOLD, GREEN PUBLISHED	LIM, SU-HO/0000-0003-3807-4163	12300 TWINBROOK PARKWAY, ROCKVILLE, MD 20852-1606 USA	FEB	12	ROCKVILLE	35171225	J	ASSOC RESEARCH VISION OPHTHALMOLOGY INC	2022	LIM, SU-HO/AAE-4344-2019	RHO, S (CORRESPONDING AUTHOR), CHA UNIV, CHA BUNDANG MED CTR, DEPT OPHTHALMOL, 59 YATAP RO, SEONGNAM SI 13496, GYEONGGI DO, SOUTH KOREA.	OPHTHALMOLOGY			2164-2591	TRANSLATIONAL VISION SCIENCE & TECHNOLOGY
XIA YL;LIU XL;LUO LX;ZENG YF;CAI XY;ZENG MB;LIU YZ	XIA, YUANLING;LIU, XIALIN;LUO, LIXIA;ZENG, YANGFA;CAI, XIAOYU;ZENG, MINGBING;LIU, YIZHI	ALIÓ JL, 2002, J CATARACT REFR SURG, V28, P67, DOI 10.1016/S0886-3350(01)01018-5;BAIKOFF G, 2004, J CATARACT REFR SURG, V30, P1843, DOI 10.1016/J.JCRS.2004.05.024;BEHRENS A, 2008, J REFRACT SURG, V24, P46, DOI 10.3928/1081597X-20080101-07;CALLADINE D, 2007, J CATARACT REFR SURG, V33, P1429, DOI 10.1016/J.JCRS.2007.04.011;CHALITA MR, 2005, AM J OPHTHALMOL, V140, P1133, DOI 10.1016/J.AJO.2005.06.05…	PURPOSE: WE AIMED TO INVESTIGATE THE ULTRASTRUCTURES OF CLEAR CORNEAL INCISIONS 24 HOURS AFTER PHACOEMULSIFICATION USING ANTERIOR SEGMENT OPTICAL COHERENCE TOMOGRAPHY (AS-OCT). METHODS: SIXTY EYES OF 60 PATIENTS SCHEDULED FOR CATARACT SURGERY WERE RANDOMLY SELECTED. ALL EYES UNDERWENT THE SAME PHACOEMULSIFICATION PROCEDURE CARRIED OUT BY ONE EXPERIENCED SURGEON. TWO-PLANE TEMPORAL CLEAR CORNEAL T…				764	SUN YAT SEN UNIV, ZHONGSHAN OPHTHALM CTR, KEY LAB OPHTHALMOL, DEPT CATARACT, GUANGZHOU 510060, GUANGDONG, PEOPLES R CHINA.; GUIYANG MED COLL, AFFILIATED HOSP 1, DEPT OPHTHALMOL, GUIYANG, GUIZHOU, PEOPLES R CHINA.; GUANGZHOU MED UNIV, HOSP 2, DEPT OPHTHALMOL, GUANGZHOU, GUANGDONG, PEOPLES R CHINA.;	SUN YAT SEN UNIVERSITY; GUIZHOU MEDICAL UNIVERSITY; GUANGZHOU MEDICAL UNIVERSITY					2024-02-18	ANTERIOR SEGMENT OPTICAL COHERENCE TOMOGRAPHY; CLEAR CORNEAL INCISION; MORPHOLOGY; PHACOEMULSIFICATION	10.1111/j.1755-3768.2008.01333.x	ARTICLE			1755-3768	LIUYIZHI62@163.COM	768				509FF	DESCEMETS-MEMBRANE DETACHMENT; INTRAOCULAR-LENS IMPLANTATION; CATARACT-SURGERY; POSTOPERATIVE PERIOD; CHAMBER; WIDTH; ULTRASTRUCTURE; EXTRACTION; TRAUMA	7	ACTA OPHTHALMOL	ACTA OPHTHALMOL.	ENGLISH	34	BRONZE		111 RIVER ST, HOBOKEN 07030-5774, NJ USA	NOV	5	HOBOKEN	19548882	J	WILEY	2009	WANG, BIN/JGM-2639-2023; LIU, YI/GXE-9662-2022; LIU, YI/HTN-4916-2023	LIU, YZ (CORRESPONDING AUTHOR), SUN YAT SEN UNIV, ZHONGSHAN OPHTHALM CTR, KEY LAB OPHTHALMOL, DEPT CATARACT, GUANGZHOU 510060, GUANGDONG, PEOPLES R CHINA.	OPHTHALMOLOGY			1755-375X	ACTA OPHTHALMOLOGICA
LIM LS;AUNG HT;AUNG T;TAN DTH	LIM, LAURENCE S.;AUNG, HAN T.;AUNG, TIN;TAN, DONALD T. H.	ANWAR M, 2002, J CATARACT REFR SURG, V28, P398, DOI 10.1016/S0886-3350(01)01181-6;ARDIOMAND N, 2007, AM J OPHTHALMOL, V143, P228, DOI 10.1016/J.AJO.2006.10.043;GAILITIS RP, 2002, J REFRACT SURG, V18, P439;HAQUE S, 2006, J REFRACT SURG, V22, P486, DOI 10.3928/1081-597X-20060501-11;HIRANO K, 2001, CORNEA, V20, P530, DOI 10.1097/00003226-200107000-00018;LAI MM, 2006, J CATARACT REFR SURG, V32, P1860…	PURPOSE: TO ASSESS AND DESCRIBE THE USES OF ANTERIOR SEGMENT OPTICAL COHERENCE TOMOGRAPHY (OCT) IN THE EVALUATION OF THE CORNEA BEFORE AND AFTER LAMELLAR CORNEAL TRANSPLANTATION PROCEDURES. DESIGN: PROSPECTIVE, NONCOMPARATIVE, OBSERVATIONAL CASE SERIES. METHODS: SEVEN EYES OF SEVEN PATIENTS UNDERGOING ANTERIOR AND POSTERIOR LAMELLAR CORNEAL TRANSPLANTATION PROCEDURES AT THE SINGAPORE NATIONAL EYE…				81	SINGAPORE NATL EYE CTR, CORNEA DEPT, SINGAPORE 168751, SINGAPORE.; SINGAPORE EYE RES INST, SINGAPORE, SINGAPORE.; NATL UNIV SINGAPORE, SINGAPORE 117548, SINGAPORE.;	SINGAPORE NATIONAL EYE CENTER; NATIONAL UNIVERSITY OF SINGAPORE; SINGAPORE NATIONAL EYE CENTER; NATIONAL UNIVERSITY OF SINGAPORE					2024-02-18		10.1016/j.ajo.2007.08.019	ARTICLE			1879-1891	DONALD.TAN.T.H@SNEC.COM.SG	90				246AR	FLAP THICKNESS	1	AM J OPHTHALMOL	AM. J. OPHTHALMOL.	ENGLISH	13			STE 800, 230 PARK AVE, NEW YORK, NY 10169 USA	JAN	10	NEW YORK	18028862	J	ELSEVIER SCIENCE INC	2008	TIN, AUNG/B-6521-2009	TAN, DTH (CORRESPONDING AUTHOR), SINGAPORE NATL EYE CTR, CORNEA DEPT, 11 3RD HOSP AVE, SINGAPORE 168751, SINGAPORE.	OPHTHALMOLOGY			0002-9394	AMERICAN JOURNAL OF OPHTHALMOLOGY
MEMARZADEH F;LI Y;CHOPRA V;VARMA R;FRANCIS BA;HUANG D	MEMARZADEH, FARNAZ;LI, YAN;CHOPRA, VIKAS;VARMA, ROHIT;FRANCIS, BRIAN A.;HUANG, DAVID	CHALITA MR, 2005, AM J OPHTHALMOL, V140, P1133, DOI 10.1016/J.AJO.2005.06.054;HUANG D, 1991, SCIENCE, V254, P1178, DOI 10.1126/SCIENCE.1957169;ISHIKAWA H, 2000, CURR OPIN OPHTHALMOL, V11, P133, DOI 10.1097/00055735-200004000-00012;PAVLIN CJ, 1992, AM J OPHTHALMOL, V113, P381, DOI 10.1016/S0002-9394(14)76159-8;RADHAKRISHNAN S, 2005, ARCH OPHTHALMOL-CHIC, V123, P1053, DOI 10.1001/ARCHOPHT.123.8.105…	PURPOSE: TO EVALUATE CHANGES IN ANTERIOR SEGMENT MORPHOLOGY BY ANTERIOR SEGMENT OPTICAL COHERENCE TOMOGRAPHY (OCT) AND GONIOSCOPY BEFORE AND AFTER LASER PERIPHERAL IRIDOTOMY (LPI). DESIGN: PROSPECTIVE COMPARATIVE OBSERVATIONAL CASE SERIES. METHODS: TEN EYES OF 10 PATIENTS WITH NARROW ANGLES WERE ENROLLED IN THE STUDY. ANGLES WERE ASSESSED BY GONIOSCOPY AND ANTERIOR SEGMENT OCT PRE- AND POST-LPI. …				877	UNIV SO CALIF, DOHENY EYE INST, LOS ANGELES, CA 90033 USA.; UNIV SO CALIF, KECK SCH MED, DEPT OPHTHALMOL, LOS ANGELES, CA 90033 USA.;	DOHENY EYE INSTITUTE; UNIVERSITY OF SOUTHERN CALIFORNIA; UNIVERSITY OF SOUTHERN CALIFORNIA					2024-02-18		10.1016/j.ajo.2006.11.055	ARTICLE				DHUANG@USC.EDU	879		NEI NIH HHS [R01 EY013516, R24 EY013015, R24 EY 13015] FUNDING SOURCE: MEDLINE		165FF	ULTRASOUND BIOMICROSCOPY	5	AM J OPHTHALMOL	AM. J. OPHTHALMOL.	ENGLISH	7	GREEN ACCEPTED		360 PARK AVE SOUTH, NEW YORK, NY 10010-1710 USA	MAY	3	NEW YORK	17452177	J	ELSEVIER SCIENCE INC	2007		HUANG, D (CORRESPONDING AUTHOR), UNIV SO CALIF, DOHENY EYE INST, 1450 SAN PABLO ST,DEI5702, LOS ANGELES, CA 90033 USA.	OPHTHALMOLOGY			0002-9394	AMERICAN JOURNAL OF OPHTHALMOLOGY
WONG AL;LEUNG CKS;WEINREB RN;CHENG AKC;CHEUNG CYL;LAM PTH;PANG CP;LAM DSC	WONG, A. L.;LEUNG, C. K-S;WEINREB, R. N.;CHENG, A. K. C.;CHEUNG, C. Y. L.;LAM, P. T-H;PANG, C. P.;LAM, D. S. C.	ASSIA EI, 1997, GRAEF ARCH CLIN EXP, V235, P745, DOI 10.1007/BF02332857;BLAND JM, 1996, BRIT MED J, V313, P744;CHYLACK LT, 1993, ARCH OPHTHALMOL-CHIC, V111, P831, DOI 10.1001/ARCHOPHT.1993.01090060119035;CLARKE MP, 1990, BRIT J OPHTHALMOL, V74, P526, DOI 10.1136/BJO.74.9.526;DADA T, 2007, J CATARACT REFR SURG, V33, P837, DOI 10.1016/J.JCRS.2007.01.021;DUNNE MCM, 2007, J BIOMED OPT, V12, DOI 10.11…	AIM: TO EVALUATE THE RELIABILITY OF LENS DENSITY MEASUREMENT WITH ANTERIOR SEGMENT OPTICAL COHERENCE TOMOGRAPHY (OCT) AND ITS ASSOCIATION WITH THE LENS OPACITY CLASSIFICATION SYSTEM VERSION III (LOCS III) GRADING. METHODS: FIFTY-FIVE EYES FROM 55 AGE-RELATED CATARACT PATIENTS WERE INCLUDED. ONE EYE FROM EACH SUBJECT WAS SELECTED AT RANDOM FOR LENS EVALUATION. AFTER DILATION, LENS PHOTOGRAPHS WERE…				61	CHINESE UNIV HONG KONG, DEPT OPHTHALMOL & VISUAL SCI, HONG KONG, HONG KONG, PEOPLES R CHINA.; UNIV CALIF SAN DIEGO, HAMILTON GLAUCOMA CTR, LA JOLLA, CA 92093 USA.;	CHINESE UNIVERSITY OF HONG KONG; UNIVERSITY OF CALIFORNIA SYSTEM; UNIVERSITY OF CALIFORNIA SAN DIEGO					2024-02-18		10.1136/bjo.2008.137653	ARTICLE			1468-2079	TLIMS00@HOTMAIL.COM	65				385SK	CHAMBER ANGLE MEASUREMENT; SLIT LAMP; REPRODUCIBILITY; SYSTEM; METER	1	BRIT J OPHTHALMOL	BR. J. OPHTHALMOL.	ENGLISH	19		CHEUNG, CAROL/0000-0002-9672-1819; LEUNG, CHRIS/0000-0003-4862-777X; CHEUNG, CAROL/0000-0003-0869-859X	BRITISH MED ASSOC HOUSE, TAVISTOCK SQUARE, LONDON WC1H 9JR, ENGLAND	JAN	5	LONDON	18838411	J	BMJ PUBLISHING GROUP	2009	CHEUNG, CAROL/AAF-1101-2020; LAM, DENNIS/AAL-1211-2020; PANG, CHI P/I-5388-2014; LEUNG, CHRIS/N-8015-2019; CHEUNG, CAROL Y./G-7895-2016	LEUNG, CKS (CORRESPONDING AUTHOR), CHINESE UNIV HONG KONG, HONG KONG EYE HOSP, DEPT OPHTHALMOL & VISUAL SCI, 147K ARGYLE ST, KOWLOON, HONG KONG, PEOPLES R CHINA.	OPHTHALMOLOGY			0007-1161	BRITISH JOURNAL OF OPHTHALMOLOGY
ZHANG HT;XU L;CAO WF;WANG YX;JONAS JB	ZHANG, HAI TAO;XU, LIANG;CAO, WEI FANG;WANG, YA XING;JONAS, JOST B.	BOURNE RRA, 2003, BRIT J OPHTHALMOL, V87, P1069, DOI 10.1136/BJO.87.9.1069;DANDONA L, 2000, OPHTHALMOLOGY, V107, P1710, DOI 10.1016/S0161-6420(00)00274-8;FOSTER PJ, 2002, BRIT J OPHTHALMOL, V86, P238, DOI 10.1136/BJO.86.2.238;FOSTER PJ, 1996, ARCH OPHTHALMOL-CHIC, V114, P1235, DOI 10.1001/ARCHOPHT.1996.01100140435011;FOSTER PJ, 2000, BRIT J OPHTHALMOL, V84, P186, DOI 10.1136/BJO.84.2.186;FOSTER P…	TO ASSESS ANTERIOR SEGMENT OPTICAL COHERENCE TOMOGRAPHIC MEASUREMENTS OF PATIENTS AFTER ACUTE UNILATERAL PRIMARY ANGLE CLOSURE (APAC) COMPARED WITH THOSE OF NORMAL SUBJECTS. THE CLINICAL OBSERVATIONAL STUDY INCLUDED 41 HOSPITAL-BASED PATIENTS AFTER UNILATERAL APAC, THEIR UNAFFECTED CONTRALATERAL EYES, AND 205 SUBJECTS. THESE WERE SELECTED FROM THE POPULATION-BASED BEIJING EYE STUDY, AND WERE MATC…				825	BEIJING INST OPHTHALMOL, BEIJING 100005, PEOPLES R CHINA.; CAPITAL MED UNIV, BEIJING TONGREN HOSP, BEIJING INST OPHTHALMOL, BEIJING, PEOPLES R CHINA.; UNIV HEIDELBERG, MED FAC MANNHEIM, DEPT OPHTHALMOL, D-6800 MANNHEIM, GERMANY.;	CAPITAL MEDICAL UNIVERSITY; RUPRECHT KARLS UNIVERSITY HEIDELBERG					2024-02-18	GLAUCOMA; ANGLE CLOSURE GLAUCOMA; OPTICAL COHERENCE TOMOGRAPHY; ANTERIOR CHAMBER DEPTH; ANTERIOR CHAMBER ANGLE; INTRAOCULAR PRESSURE	10.1007/s00417-009-1291-3	ARTICLE				XLBIO@YAHOO.CN	831				587PT	POPULATION-BASED SURVEY; BEIJING EYE; CHAMBER DEPTH; 5-YEAR RISK; GLAUCOMA; PREVALENCE; BIOMICROSCOPY; DISTRICT; CHINESE; PROGRESSION	6	GRAEF ARCH CLIN EXP	GRAEFES ARCH. CLIN. EXP. OPHTHALMOL.	ENGLISH	21			233 SPRING ST, NEW YORK, NY 10013 USA	JUN	7	NEW YORK	20127107	J	SPRINGER	2010	WANG, YA XING/K-9671-2016	XU, L (CORRESPONDING AUTHOR), BEIJING INST OPHTHALMOL, 17 HOUGOU ST, BEIJING 100005, PEOPLES R CHINA.	OPHTHALMOLOGY			0721-832X	GRAEFES ARCHIVE FOR CLINICAL AND EXPERIMENTAL OPHTHALMOLOGY
MARAM J;PAN XJ;SADDA S;FRANCIS B;MARION K;CHOPRA V	MARAM, JYOTSNA;PAN, XIAOJING;SADDA, SRINIVAS;FRANCIS, BRIAN;MARION, KENNETH;CHOPRA, VIKAS	CONSOLE JW, 2008, BRIT J OPHTHALMOL, V92, P1612, DOI 10.1136/BJO.2007.129932;CUMBA RJ, 2012, J OPHTHALMOL, V2012, DOI 10.1155/2012/487309;DAWCZYNSKI J, 2007, GRAEF ARCH CLIN EXP, V245, P423, DOI 10.1007/S00417-006-0383-6;FRIEDMAN DS, 2008, SURV OPHTHALMOL, V53, P250, DOI 10.1016/J.SURVOPHTHAL.2007.10.012;ISHIKAWA H, 2000, OPHTHALMIC SURG LAS, V31, P342;ISHIKAWA H, 1999, JPN J OPHTHALMOL, V43, P52…	PURPOSE: TO EVALUATE THE REPRODUCIBILITY OF ANTERIOR CHAMBER ANGLE MEASUREMENTS OBTAINED BY THE ZEISS VISANTE ANTERIOR SEGMENT OPTICAL COHERENCE TOMOGRAPHY (AS-OCT). METHODS: TWENTY EYES FROM 20 NORMAL SUBJECTS WITH OPEN ANTERIOR CHAMBER ANGLES WERE STUDIED. THE ANTERIOR CHAMBER ANGLE WAS IMAGED USING THE VISANTE AS-OCT. THE ANGLE-OPENING DISTANCE (AOD 500, AOD 750), TRABERCULAR IRIS SPACE AREA (…				496	DOHENY EYE INST, DOHENY IMAGE READING CTR, LOS ANGELES, CA 90033 USA.; QINGDAO UNIV, AFFILIATED HOSP, COLL MED, QINGDAO, SHANDONG, PEOPLES R CHINA.; UNIV SO CALIF, KECK SCH MED, DEPT OPHTHALMOL, LOS ANGELES, CA 90033 USA.;	DOHENY EYE INSTITUTE; QINGDAO UNIVERSITY; UNIVERSITY OF SOUTHERN CALIFORNIA					2024-02-18	ANTERIOR CHAMBER ANGLE; ANTERIOR-SEGMENT OCT; GLAUCOMA; METRICS; OPTICAL COHERENCE TOMOGRAPHY; REPRODUCIBILITY	10.3109/02713683.2014.930155	ARTICLE			1460-2202	VCHOPRA@DOHENY.ORG	500				CG8RS	CHAMBER ANGLE; ULTRASOUND BIOMICROSCOPY; QUANTITATIVE-ANALYSIS; IRIDOCORNEAL ANGLE; IMAGES	5	CURR EYE RES	CURR. EYE RES.	ENGLISH	24			TELEPHONE HOUSE, 69-77 PAUL STREET, LONDON EC2A 4LQ, ENGLAND	MAY	5	LONDON	24955626	J	INFORMA HEALTHCARE	2015		CHOPRA, V (CORRESPONDING AUTHOR), DOHENY EYE INST, DOHENY IMAGE READING CTR, MD, 1450 SAN PABLO ST DEI 3615, LOS ANGELES, CA 90033 USA.	OPHTHALMOLOGY			0271-3683	CURRENT EYE RESEARCH
BASARIR B;PASAOGLU I;ALTAN C;SOLMAZ B;AKSOY FE;TÜLÜ B;TASKAPILI M	BASARIR, B.;PASAOGLU, I;ALTAN, C.;SOLMAZ, B.;AKSOY, F. E.;TULU, B.;TASKAPILI, M.	ALVARADO JA, 1992, ARCH OPHTHALMOL-CHIC, V110, P1769, DOI 10.1001/ARCHOPHT.1992.01080240109042;APTEL F, 2011, OPHTHALMOLOGY, V118, P1563, DOI 10.1016/J.OPHTHA.2011.01.001;BASARIR B, 2013, INT OPHTHALMOL, V33, P245, DOI 10.1007/S10792-012-9680-8;BREINGAN PJ, 1999, ARCH OPHTHALMOL-CHIC, V117, P325, DOI 10.1001/ARCHOPHT.117.3.325;CAMPBELL DG, 1979, ARCH OPHTHALMOL-CHIC, V97, P1667, DOI 10.1001/ARCHO…	PURPOSE. - TO COMPARE THE ANTERIOR SEGMENT OPTICAL COHERENCE TOMOGRAPHY (AS-OCT) MEASUREMENTS OF EYES WITH PIGMENT DISPERSION SYNDROME (PDS) AND OCULAR HYPERTENSION (OHT) BEFORE AND AFTER NEODYMIUM:YTTRIUM-ALUMINUM-GARNET (ND:YAG) LASER PERIPHERAL IRIDOTOMY (LPI). METHODS. - A TOTAL OF 23 EYES OF 23 PATIENTS WITH PDS AND OHT WITH FEATURES OF PDS WERE INCLUDED IN THIS RETROSPECTIVE STUDY. ALL OF T…				203	UNIV HLTH SCI, BEYOGLU EYE TRAINING & RES HOSP, ISTANBUL, TURKEY.;	UNIVERSITY OF HEALTH SCIENCES TURKEY					2024-02-18	PIGMENT DISPERSION SYNDROME; LASER PERIPHERAL IRIDOTOMY; ANTERIOR SEGMENT OPTICAL COHERENCE TOMOGRAPHY	10.1016/j.jfo.2020.04.057	ARTICLE; EARLY ACCESS	FEB 2021		1773-0597	IBASGIL@YAHOO.COM	208				QX1PJ	INTRAOCULAR-PRESSURE; GLAUCOMA	2	J FR OPHTALMOL	J. FR. OPHTHAMOL.	ENGLISH	23			21 STREET CAMILLE DESMOULINS, ISSY, 92789 MOULINEAUX CEDEX 9, FRANCE	2021 FEB	6	MOULINEAUX CEDEX 9	33384165	J	MASSON EDITEUR	2021	PASAOGLU, ISIL/JJE-4958-2023	PASAOGLU, I (CORRESPONDING AUTHOR), BAHCESEHIR 2,SELL ST,MANLY APT B1-32, BASAKSEHIR ISTANBUL, TURKEY.	OPHTHALMOLOGY			0181-5512	JOURNAL FRANCAIS D OPHTALMOLOGIE
HILLARD JG	HILLARD, JACOB G.	ALVARADO JA, 1986, INVEST OPHTH VIS SCI, V27, P853;AUNG T, 2005, OPHTHALMOLOGY, V112, P28, DOI 10.1016/J.OPHTHA.2004.06.033;CAMPBELL DG, 1978, AM J OPHTHALMOL, V86, P317, DOI 10.1016/0002-9394(78)90232-5;EAGLE RC, 1979, ARCH OPHTHALMOL-CHIC, V97, P2104, DOI 10.1001/ARCHOPHT.1979.01020020422002;HEON E, 1995, HUM MOL GENET, V4, P485, DOI 10.1093/HMG/4.3.485;HOOKS JJ, 1995, ARCH OPHTHALMOL-CHIC, V11…	SIGNIFICANCE: IRIDOCORNEAL ENDOTHELIAL (ICE) SYNDROME IS CHARACTERIZED BY A DIFFICULT-TO-SEE MEMBRANE OF ECTOPIC CORNEAL ENDOTHELIAL CELLS, CALLED AN ICE MEMBRANE. THIS REPORT DEMONSTRATES THAT ICE MEMBRANES ARE DETECTABLE BY ANTERIOR SEGMENT OPTICAL COHERENCE TOMOGRAPHY (AS-OCT) AND HIGHLIGHTS THE BENEFITS OF USING AS-OCT IN ICE SYNDROME. PURPOSE A CASE OF ICE SYNDROME IS REPORTED TO HIGHLIGHT T…				309	VA BOSTON HEALTHCARE SYST, OPTOMETRY SECT, BOSTON, MA 02130 USA.;	US DEPARTMENT OF VETERANS AFFAIRS; VETERANS HEALTH ADMINISTRATION (VHA); HARVARD UNIVERSITY; VA BOSTON HEALTHCARE SYSTEM					2024-02-18		10.1097/OPX.0000000000001358	ARTICLE			1538-9235	JAKEHILLARD.O.D@GMAIL.COM	313				HR5PB	INTRAOCULAR-PRESSURE; VIRUS	4	OPTOMETRY VISION SCI	OPTOM. VIS. SCI.	ENGLISH	13			TWO COMMERCE SQ, 2001 MARKET ST, PHILADELPHIA, PA 19103 USA	APR	5	PHILADELPHIA	30907858	J	LIPPINCOTT WILLIAMS & WILKINS	2019		HILLARD, JG (CORRESPONDING AUTHOR), VA BOSTON HEALTHCARE SYST, OPTOMETRY SECT, BOSTON, MA 02130 USA.	OPHTHALMOLOGY			1040-5488	OPTOMETRY AND VISION SCIENCE
KIM SH;KANG JH;PARK KH;HONG C	KIM, SEOK HWAN;KANG, JA HEON;PARK, KI HO;HONG, CHUL	DADA T, 2007, J CATARACT REFR SURG, V33, P837, DOI 10.1016/J.JCRS.2007.01.021;DANDONA L, 2000, OPHTHALMOLOGY, V107, P1710, DOI 10.1016/S0161-6420(00)00274-8;FOSTER PAUL J, 2002, SEMIN OPHTHALMOL, V17, P50;FOSTER PJ, 1996, ARCH OPHTHALMOL-CHIC, V114, P1235, DOI 10.1001/ARCHOPHT.1996.01100140435011;FRIEDMAN DS, 2008, SURV OPHTHALMOL, V53, P250, DOI 10.1016/J.SURVOPHTHAL.2007.10.012;HARRIS LS, 1972,…	TO COMPARE HONG'S GRADING METHOD WITH ANTERIOR SEGMENT OPTICAL COHERENCE TOMOGRAPHY (AS-OCT), GONIOSCOPY, AND THE DARK-ROOM PRONE-POSITION TEST (DRPT) FOR EVALUATING ANTERIOR CHAMBER WIDTH. THE ANTERIOR CHAMBER ANGLE WAS GRADED USING HONG'S GRADING METHOD, AND HONG'S ANGLE WIDTH WAS CALCULATED FROM THE ARCTANGENT OF HONG'S GRADES. THE CORRELATION BETWEEN HONG'S ANGLE WIDTH AND AS-OCT PARAMETERS W…				551	SEOUL NATL UNIV, COLL MED, DEPT OPHTHALMOL, SEOUL 110744, SOUTH KOREA.; SEOUL NATL UNIV, BORAMAE HOSP, DEPT OPHTHALMOL, SEOUL, SOUTH KOREA.; KYUNG HEE UNIV, COLL MED, KYUNG HEE UNIV HOSP GANGDONG, DEPT OPHTHALMOL, SEOUL, SOUTH KOREA.; SEOUL NATL UNIV HOSP, DEPT OPHTHALMOL, SEOUL 110744, SOUTH KOREA.; DR HONGS EYE CLIN, GLAUCOMA SERV, SEOUL, SOUTH KOREA.;	SEOUL NATIONAL UNIVERSITY (SNU); SEOUL NATIONAL UNIVERSITY (SNU); SEOUL NATIONAL UNIVERSITY HOSPITAL; KYUNG HEE UNIVERSITY; KYUNG HEE UNIVERSITY HOSPITAL; SEOUL NATIONAL UNIVERSITY (SNU); SEOUL NATIONAL UNIVERSITY HOSPITAL					2024-02-18	HONG'S GRADING METHOD; ANTERIOR CHAMBER ANGLE; GONIOSCOPY; ANTERIOR SEGMENT OPTICAL COHERENCE TOMOGRAPHY; DARK-ROOM PRONE-POSITION TEST	10.1007/s10384-012-0180-1	ARTICLE			1613-2246	KIHOPARK@SNU.AC.KR	558		BORAMAE MEDICAL CENTER RESEARCH FUND	THIS STUDY WAS SUPPORTED BY A GRANT FROM THE BORAMAE MEDICAL CENTER RESEARCH FUND (2011).	036AC	OPTICAL COHERENCE TOMOGRAPHY; CLOSURE GLAUCOMA; PROVOCATIVE TEST; ULTRASOUND BIOMICROSCOPY; NARROW ANGLE; SEGMENT; POPULATION	6	JPN J OPHTHALMOL	JPN. J. OPHTHALMOL.	ENGLISH	17			CHIYODA FIRST BLDG EAST, 3-8-1 NISHI-KANDA, CHIYODA-KU, TOKYO, 101-0065, JAPAN	NOV	8	TOKYO	22972394	J	SPRINGER JAPAN KK	2012	PARK, KI HO/G-9603-2011	PARK, KH (CORRESPONDING AUTHOR), SEOUL NATL UNIV, COLL MED, DEPT OPHTHALMOL, 28 YONGON DONG, SEOUL 110744, SOUTH KOREA.	OPHTHALMOLOGY			0021-5155	JAPANESE JOURNAL OF OPHTHALMOLOGY
SALIM S	SALIM, SARWAT	APTEL F, 2011, OPHTHALMOLOGY, V118, P1563, DOI 10.1016/J.OPHTHA.2011.01.001;AUNG T, 2005, OPHTHALMOLOGY, V112, P28, DOI 10.1016/J.OPHTHA.2004.06.033;BARKANA Y, 2007, ARCH OPHTHALMOL-CHIC, V125, P1331, DOI 10.1001/ARCHOPHT.125.10.1331;BECHMANN M, 2001, CORNEA, V20, P50, DOI 10.1097/00003226-200101000-00010;CHALITA MR, 2005, AM J OPHTHALMOL, V140, P1133, DOI 10.1016/J.AJO.2005.06.054;CHEON MH, 2010…	THE ANTERIOR SEGMENT OPTICAL COHERENCE TOMOGRAPHY PROVIDES AN OBJECTIVE METHOD TO ASSESS THE ANTERIOR SEGMENT OF THE EYE, INCLUDING THE ANATOMY OF THE ANTERIOR CHAMBER ANGLE. THIS TECHNOLOGY ALLOWS BOTH QUALITATIVE AND QUANTITATIVE ANALYSES OF THE ANGLE AND HAS SHOWN POTENTIAL IN DETECTING AND MANAGING ANGLE-CLOSURE GLAUCOMA. IN ADDITION, IT HAS A ROLE IN IDENTIFYING PATHOLOGY IN SOME FORMS OF SE…	476801				UNIV TENNESSEE, HAMILTON EYE INST, MEMPHIS, TN 38163 USA.;	UNIVERSITY OF TENNESSEE SYSTEM; UNIVERSITY OF TENNESSEE HEALTH SCIENCE CENTER					2024-02-18		10.1155/2012/476801	REVIEW			2090-0058	SSALIM@UTHSC.EDU					997OF	CORNEAL THICKNESS MEASUREMENTS; CHAMBER ANGLE MEASUREMENT; ULTRASOUND BIOMICROSCOPY; HIGH-SPEED; CLOSURE GLAUCOMA; LASER IRIDOTOMY; VISANTE; REPRODUCIBILITY; MORPHOLOGY; TRABECULECTOMY		J OPHTHALMOL	J. OPHTHALMOL.	ENGLISH	57	GOLD, GREEN SUBMITTED, GREEN PUBLISHED		ADAM HOUSE, 3RD FLR, 1 FITZROY SQ, LONDON, W1T 5HF, ENGLAND		9	LONDON	22900146	J	HINDAWI LTD	2012		SALIM, S (CORRESPONDING AUTHOR), UNIV TENNESSEE, HAMILTON EYE INST, 930 MADISON AVE,SUITE 470, MEMPHIS, TN 38163 USA.	OPHTHALMOLOGY			2090-004X	JOURNAL OF OPHTHALMOLOGY
YU XP;PAN WH;REN M;QU J	YU XINPING;PAN WEIHUA;REN MEI;QU JIA	BURÉS-JELSTRUP A, 2008, ACTA OPHTHALMOL, V86, P810, DOI 10.1111/J.1600-0420.2007.01130.X;CHIOU AGY, 1998, OPHTHALMOLOGY, V105, P746, DOI 10.1016/S0161-6420(98)94033-7;EDMUNDS B, 2002, EYE, V16, P297, DOI 10.1038/SJ.EYE.6700148;FEKRAT S, 2001, RETINA, P1770;ISHIKAWA H, 2007, BRIT J OPHTHALMOL, V91, P1420, DOI 10.1136/BJO.2007.121038;ITO K, 2002, J GLAUCOMA, V11, P540, DOI 10.1097/00061198-20021200…	PURPOSE: TO ANALYZE THE APPEARANCE OF SUPRACILIOCHOROIDAL FLUID (SCF) WITHIN 1 WEEK AFTER TRABECULECTOMY WITH ANTERIOR SEGMENT OPTICAL COHERENCE TOMOGRAPHY (AS-OCT), A HIGH-RESOLUTION, NON-CONTACT DETECTION METHOD. METHODS: IN THIS PROSPECTIVE, NON-COMPARATIVE STUDY, AS-OCT WAS USED TO ASSESS THE INCIDENCE OF SCF IN 25 EYES OF 22 GLAUCOMA PATIENTS WHO UNDERWENT TRABECULECTOMY. EYES WERE EXAMINED …				818	WENZHOU MED COLL, HOSP EYE, WENZHOU 325027, ZHEJIANG, PEOPLES R CHINA.;	WENZHOU MEDICAL UNIVERSITY					2024-02-18	ANTERIOR SEGMENT OPTICAL COHERENCE TOMOGRAPHY (AS-OCT); SUPRACILIOCHOROIDAL FLUID; TRABECULECTOMY; GLAUCOMA	10.3109/02713683.2011.593724	ARTICLE			1460-2202	YXPC817@163.COM	823				808WA	CHAMBER ANGLE MEASUREMENT; ULTRASOUND BIOMICROSCOPY; CLOSURE GLAUCOMA; UVEAL EFFUSION; DETACHMENT; EYES; COMPLICATIONS; PRESSURE; BLEB	9	CURR EYE RES	CURR. EYE RES.	ENGLISH	21			TELEPHONE HOUSE, 69-77 PAUL STREET, LONDON EC2A 4LQ, ENGLAND	SEP	6	LONDON	21851168	J	INFORMA HEALTHCARE	2011		PAN, WH (CORRESPONDING AUTHOR), WENZHOU MED COLL, HOSP EYE, 270 XUEYUAN XI RD, WENZHOU 325027, ZHEJIANG, PEOPLES R CHINA.	OPHTHALMOLOGY			0271-3683	CURRENT EYE RESEARCH
AKIL H;DASTIRIDOU A;MARION K;FRANCIS BA;CHOPRA V	AKIL, HANDAN;DASTIRIDOU, ANNA;MARION, KENNETH;FRANCIS, BRIAN A.;CHOPRA, VIKAS	AKIL H, 2017, INT OPHTHALMOL, V37, P31, DOI 10.1007/S10792-016-0223-6;APTEL F, 2012, INVEST OPHTH VIS SCI, V53, P4005, DOI 10.1167/IOVS.11-9387;CHEUNG CYL, 2010, INVEST OPHTH VIS SCI, V51, P4040, DOI 10.1167/IOVS.09-3941;CLARK CV, 1986, BRIT MED J, V292, P1106, DOI 10.1136/BMJ.292.6528.1106;DASTIRIDOU AI, 2015, J OPHTHALMOL, V2015, DOI 10.1155/2015/845643;DINC UA, 2010, EUR J OPHTHALMOL, V20, P53…	BACKGROUND: FIRST REPORTED STUDY TO ASSESS THE EFFECT OF DIURNAL VARIATION ON ANTERIOR CHAMBER ANGLE MEASUREMENTS, AS WELL AS, TO RE-TEST THE EFFECTS OF LIGHTING AND ANGLE-OF-INCIDENCE VARIATION ON ANTERIOR CHAMBER ANGLE (ACA) MEASUREMENTS ACQUIRED BY TIME-DOMAIN ANTERIOR SEGMENT OPTICAL COHERENCE TOMOGRAPHY (AS-OCT). METHODS: A TOTAL OF 30 EYES FROM 15 HEALTHY, NORMAL SUBJECTS UNDERWENT ANTERIOR…	31				DOHENY EYE INST, DOHENY IMAGE READING CTR, 1355 SAN PABLO ST, LOS ANGELES, CA 90033 USA.; DAVID GEFFEN SCH MED, DEPT OPHTHALMOL, LOS ANGELES, CA 90095 USA.;	DOHENY EYE INSTITUTE; UNIVERSITY OF CALIFORNIA SYSTEM; UNIVERSITY OF CALIFORNIA LOS ANGELES; UNIVERSITY OF CALIFORNIA LOS ANGELES MEDICAL CENTER; DAVID GEFFEN SCHOOL OF MEDICINE AT UCLA					2024-02-18	ANTERIOR CHAMBER ANGLE; ANTERIOR SEGMENT OCT; DIURNAL VARIATION; ANGLE METRICS	10.1186/s12886-017-0425-3	ARTICLE				VCHOPRA@DOHENY.ORG					EQ2GO	SLIT-LAMP OCT; CHAMBER ANGLE; AXIAL LENGTH; INTRAOCULAR-PRESSURE; DYNAMIC-ANALYSIS; PUPIL-DILATION; TIME; FLUCTUATIONS; PARAMETERS; CLOSURE		BMC OPHTHALMOL	BMC OPHTHALMOL.	ENGLISH	27	GREEN PUBLISHED, GOLD	DASTIRIDOU, ANNA/0000-0002-2780-0062	CAMPUS, 4 CRINAN ST, LONDON N1 9XW, ENGLAND	MAR 23	5	LONDON	28335747	J	BMC	2017	DASTIRIDOU, ANNA/JJD-4802-2023	CHOPRA, V (CORRESPONDING AUTHOR), DOHENY EYE INST, DOHENY IMAGE READING CTR, 1355 SAN PABLO ST, LOS ANGELES, CA 90033 USA.; CHOPRA, V (CORRESPONDING AUTHOR), DAVID GEFFEN SCH MED, DEPT OPHTHALMOL, LOS ANGELES, CA 90095 USA.	OPHTHALMOLOGY			1471-2415	BMC OPHTHALMOLOGY
HIGASHIDE T;SHIMIZU F;NISHIMURA A;SUGIYAMA K	HIGASHIDE, TOMOMI;SHIMIZU, FUKI;NISHIMURA, AKIRA;SUGIYAMA, KAZUHISA	BADING G, 2007, AM J OPHTHALMOL, V144, P371, DOI 10.1016/J.AJO.2007.05.014;CALLADINE D, 2007, J CATARACT REFR SURG, V33, P1429, DOI 10.1016/J.JCRS.2007.04.011;CAMPBELL D G, 1995, CURR OPIN OPHTHALMOL, V6, P96;CAMPBELL DG, 1984, ARCH OPHTHALMOL-CHIC, V102, P1457, DOI 10.1001/ARCHOPHT.1984.01040031177013;CIONNI RJ, 2004, J CATARACT REFR SURG, V30, P953, DOI 10.1016/J.JCRS.2004.01.030;FINE IH, 2007,…	PURPOSE: TO EVALUATE FINDINGS OF REVERSE PUPILLARY BLOCK AFTER SCLERAL-FIXATED SUTURED POSTERIOR CHAMBER INTRAOCULAR LENS (PC IOL) IMPLANTATION USING ANTERIOR SEGMENT OPTICAL COHERENCE TOMOGRAPHY (AS-OCT) AND REPORT A POSSIBLE ASSOCIATION WITH POSTOPERATIVE COMPLICATIONS. SETTING: DEPARTMENT OF OPHTHALMOLOGY, KANAZAWA UNIVERSITY GRADUATE SCHOOL OF MEDICAL SCIENCE, KANAZAWA, JAPAN. METHODS: ANTERI…				1540	KANAZAWA UNIV, DEPT OPHTHALMOL, GRAD SCH MED SCI, KANAZAWA, ISHIKAWA 9208641, JAPAN.;	KANAZAWA UNIVERSITY					2024-02-18		10.1016/j.jcrs.2009.04.030	ARTICLE			1873-4502	EYETOMO@KENROKU.KANAZAWA-U.AC.JP	1547				496HQ	PARS-PLANA VITRECTOMY; DISPERSION SYNDROME	9	J CATARACT REFR SURG	J. CATARACT. REFRACT. SURG.	ENGLISH	16		HIGASHIDE, TOMOMI/0000-0001-9566-4587	360 PARK AVE SOUTH, NEW YORK, NY 10010-1710 USA	SEP	8	NEW YORK	19683150	J	ELSEVIER SCIENCE INC	2009		HIGASHIDE, T (CORRESPONDING AUTHOR), KANAZAWA UNIV, DEPT OPHTHALMOL, GRAD SCH MED SCI, 13-1 TAKARA MACHI, KANAZAWA, ISHIKAWA 9208641, JAPAN.	OPHTHALMOLOGY; SURGERY			0886-3350	JOURNAL OF CATARACT AND REFRACTIVE SURGERY
YU ZY;HUANG T;LU L;QU B	YU, ZI-YAN;HUANG, TING;LU, LU;QU, BO	FU HZ, 2017, IEEE T MED IMAGING, V36, P1930, DOI 10.1109/TMI.2017.2703147;KOKUBUN T, 2016, CLIN EXP OPHTHALMOL, V44, P446, DOI 10.1111/CEO.12689;KUERTEN D, 2018, J GLAUCOMA, V27, P87, DOI 10.1097/IJG.0000000000000827;KWON J, 2017, OPHTHALMOLOGY, V124, P1039, DOI 10.1016/J.OPHTHA.2017.02.025;LATA S, 2020, RETINA-J RET VIT DIS, V40, P537, DOI 10.1097/IAE.0000000000002400;LEUNG CKS, 2011, EYE, V25, …	BACKGROUND GLAUCOMA IS AN IRREVERSIBLE OPTIC NEUROPATHY WITH THE LOSS OF VISUAL FIELD AND DECREASE OF VISION. THE VARIABLE CLINICAL MANIFESTATIONS MAY RESULT IN DIFFERENTIAL DIAGNOSTIC DIFFICULTIES. THE EARLY SCREENING AND DIAGNOSIS OF GLAUCOMA ARE CURRENTLY EXPERIENCING A DEMAND FOR ANTERIOR SEGMENT ANALYSIS TOOLS THAT CAN GATHER MORE INFORMATION WITH ONE SHORT MEASUREMENT. THEREFORE, WE ANALYZE…				3249	CHINA MED UNIV, KEY LAB LENS RES LIAONING PROV, DEPT OPHTHALMOL, EYE HOSP,AFFILIATED HOSP 4, 11 XINHUA RD, SHENYANG 110005, LIAONING, PEOPLES R CHINA.; AIER MEGA OPHTHALM HOSP CHONGQING, DEPT CATARACT, CHONGQING 400060, PEOPLES R CHINA.;	CHINA MEDICAL UNIVERSITY					2024-02-18	ANTERIOR SEGMENT-OPTICAL COHERENCE TOMOGRAPHY; PRIMARY ANGLE CLOSURE GLAUCOMA; ANTERIOR CHAMBER ANGLE; ANGEL OPENING DISTANCE AT 500 M; TRABECULO-IRIS SPACE AREA AT 500 M(2)	10.12998/wjcc.v8.i15.3249	ARTICLE				DOLPHINEMU@FOXMAIL.COM	U143				NZ4QD	QUANTIFICATION; GLAUCOMA; EYES	15	WORLD J CLIN CASES	WORLD J. CLIN. CASES	ENGLISH	21	GREEN PUBLISHED, GOLD		7041 KOLL CENTER PARKWAY, SUITE 160, PLEASANTON, CA, UNITED STATES	AUG 6	11	PLEASANTON	32874979	J	BAISHIDENG PUBLISHING GROUP INC	2020		QU, B (CORRESPONDING AUTHOR), CHINA MED UNIV, KEY LAB LENS RES LIAONING PROV, DEPT OPHTHALMOL, EYE HOSP,AFFILIATED HOSP 4, 11 XINHUA RD, SHENYANG 110005, LIAONING, PEOPLES R CHINA.	GENERAL & INTERNAL MEDICINE			2307-8960	WORLD JOURNAL OF CLINICAL CASES
ZHOU AW;GIROUX J;MAO AJ;HUTNIK CML	ZHOU, ALYSIA W.;GIROUX, JASON;MAO, ALEXANDER J.;HUTNIK, CINDY M. L.	ALTAN C, 2004, J CATARACT REFR SURG, V30, P832, DOI 10.1016/J.JCRS.2003.08.023;CRICHTON AC, 2005, COMPREHENSIVE OPHTHA, V6, P269;DADA T, 2007, J CATARACT REFR SURG, V33, P837, DOI 10.1016/J.JCRS.2007.01.021;DAWCZYNSKI J, 2007, EUR J OPHTHALMOL, V17, P363, DOI 10.1177/112067210701700314;FOSTER PJ, 2000, BRIT J OPHTHALMOL, V84, P186, DOI 10.1136/BJO.84.2.186;FRIEDMAN DS, 2008, SURV OPHTHALMOL, V53,…	OBJECTIVE: TO DETERMINE WHETHER PREOPERATIVE ANTERIOR CHAMBER ANGLE WIDTH, CAPTURED BY ANTERIOR SEGMENT OPTICAL COHERENCE TOMOGRAPHY (AS-OCT), CAN BE A PREDICTOR OF INTRAOCULAR PRESSURE (IOP) CHANGE FOLLOWING CATARACT SURGERY. DESIGN: PROSPECTIVE COMPARATIVE OBSERVATIONAL STUDY. PARTICIPANTS: FIFTY-THREE EYES OF 53 PATIENTS AWAITING CATARACT SURGERY WERE INCLUDED. METHODS: MEASUREMENT OF ANTERIOR…				149	UNIV WESTERN ONTARIO, IVEY EYE INST, ST JOSEPHS HOSP, LAWSON HLTH RES INST,DEPT OPHTHALMOL, LONDON, ON N6A 4V2, CANADA.; UNIV WESTERN ONTARIO, SCHULICH SCH MED & DENT, LONDON, ON N6A 4V2, CANADA.;	WESTERN UNIVERSITY (UNIVERSITY OF WESTERN ONTARIO); MCGILL UNIVERSITY; WESTERN UNIVERSITY (UNIVERSITY OF WESTERN ONTARIO)					2024-02-18	CATARACT SURGERY; INTRAOCULAR PRESSURE; ANTERIOR CHAMBER ANGLE	10.3129/i10-009	ARTICLE			1715-3360	CINDY.HUTNIK@SJHC.LONDON.ON.CA	153		UNIVERSITY OF WESTERN ONTARIO	WE THANK DRS. IAN MCLLRAITH, BRUCE NICHOLS, AND ALAINE PROULX FOR ALLOWING US TO CONTACT THEIR PATIENTS FOR PARTICIPATION IN THIS STUDY. FUNDING WAS PROVIDED BY THE UNIVERSITY OF WESTERN ONTARIO SCHULICH RESEARCH OPPORTUNITY PROGRAM. THE AUTHORS HAVE NO PROPRIETARY OR COMMERCIAL INTEREST IN ANY MATERIALS DISCUSSED IN THIS ARTICLE.	581TB	OPTICAL COHERENCE TOMOGRAPHY; LENS IMPLANTATION; ULTRASOUND BIOMICROSCOPY; IRIDOCORNEAL ANGLE; CLOSURE GLAUCOMA; SEGMENT; PHACOEMULSIFICATION; DEPTH; EYES; REPRODUCIBILITY	2	CAN J OPHTHALMOL	CAN. J. OPTHALMOL.-J. CAN. OPTHALMOL.	ENGLISH	22			1525 CARLING AVE SUITE 610, OTTAWA, ONTARIO K1Z 8R9, CANADA	APR	5	OTTAWA	20379300	J	CANADIAN OPHTHAL SOC	2010		HUTNIK, CML (CORRESPONDING AUTHOR), UNIV WESTERN ONTARIO, IVEY EYE INST, ST JOSEPHS HOSP, LAWSON HLTH RES INST,DEPT OPHTHALMOL, 268 GROSVENOR ST, LONDON, ON N6A 4V2, CANADA.	OPHTHALMOLOGY			0008-4182	CANADIAN JOURNAL OF OPHTHALMOLOGY-JOURNAL CANADIEN D OPHTALMOLOGIE
CHEON MH;SUNG KR;CHOI EH;KANG SY;CHO JW;LEE S;KIM JY;TCHAH HW;KOOK MS	CHEON, MI HYUN;SUNG, KYUNG RIM;CHOI, EUN HEE;KANG, SUNG YONG;CHO, JUNG WOO;LEE, SUHWAN;KIM, JAE YONG;TCHAH, HUNG WON;KOOK, MICHAEL S.	CONGDON N, 1992, SURV OPHTHALMOL, V36, P411, DOI 10.1016/S0039-6257(05)80022-0;FOSTER PJ, 1997, AM J OPHTHALMOL, V124, P53, DOI 10.1016/S0002-9394(14)71644-7;FOSTER PJ, 2000, BRIT J OPHTHALMOL, V84, P186, DOI 10.1136/BJO.84.2.186;FOSTER PJ, 2000, ARCH OPHTHALMOL-CHIC, V118, P1105, DOI 10.1001/ARCHOPHT.118.8.1105;HE MG, 2008, OPHTHALMOLOGY, V115, P1286, DOI 10.1016/J.OPHTHA.2007.12.003;HOERAUF H, …	PURPOSE: TO EVALUATE THE DISTRIBUTION OF ANTERIOR CHAMBER ANGLE (ACA) PARAMETERS AND TO ASSESS ASSOCIATION OF THESE PARAMETERS WITH AGE IN ASIAN SUBJECTS. METHODS: FOUR HUNDRED AND THIRTY-NINE CONSECUTIVE KOREAN SUBJECTS AGED FROM 30 TO 89 WERE ENROLLED FROM A UNIVERSITY CLINIC. ALL PARTICIPANTS WERE SCANNED USING ANTERIOR SEGMENT OPTICAL COHERENCE TOMOGRAPHY (AS-OCT, VISANTE, VERSION 2.0). WE ME…				E205	UNIV ULSAN, COLL MED, ASAN MED CTR, DEPT OPHTHALMOL, SEOUL 138736, SOUTH KOREA.; YONSEI UNIV, COLL MED, DEPT BIOSTAT, SEOUL, SOUTH KOREA.;	UNIVERSITY OF ULSAN; ASAN MEDICAL CENTER; YONSEI UNIVERSITY; YONSEI UNIVERSITY HEALTH SYSTEM					2024-02-18	AGE; ANGLE CLOSURE; ANTERIOR CHAMBER ANGLE; ANTERIOR SEGMENT OPTICAL COHERENCE TOMOGRAPHY	10.1111/j.1755-3768.2010.01960.x	ARTICLE				MSKOOK@AMC.SEOUL.KR	E210				643PI	CLOSURE GLAUCOMA; EYE; DEPTH; POPULATION; PREVALENCE; CHINESE	6	ACTA OPHTHALMOL	ACTA OPHTHALMOL.	ENGLISH	21	BRONZE	CHOI, EUNHEE/0000-0002-3449-0672	COMMERCE PLACE, 350 MAIN ST, MALDEN 02148, MA USA	SEP	6	MALDEN	20670345	J	WILEY-BLACKWELL	2010		KOOK, MS (CORRESPONDING AUTHOR), UNIV ULSAN, COLL MED, ASAN MED CTR, DEPT OPHTHALMOL, 388-1 PUNGNAP 2 DONG, SEOUL 138736, SOUTH KOREA.	OPHTHALMOLOGY			1755-375X	ACTA OPHTHALMOLOGICA
BECKMANN L;CAI Z;MARGOLIS M;FANG R;DJALILIAN A;ZHANG HF	BECKMANN, LISA;CAI, ZHEN;MARGOLIS, MATHEW;FANG, RAYMOND;DJALILIAN, ALI;ZHANG, HAO F.	ALAGHBAND P, 2018, BRIT J OPHTHALMOL, V102, P1520, DOI 10.1136/BJOPHTHALMOL-2017-311548;ANDREEV AY, 2021, EXP EYE RES, V207, DOI 10.1016/J.EXER.2021.108580;ANG M, 2018, SCI REP-UK, V8, DOI 10.1038/S41598-018-29761-4;ANG M, 2016, BRIT J OPHTHALMOL, V100, P1557, DOI 10.1136/BJOPHTHALMOL-2015-307706;ASAI-COAKWELL M, REDUCED HUMAN MURINE;ASRANI S, DETAILED VISUALIZATI;BAI YQ, 2021, OCUL SURF, V21, P2…	ANTERIOR SEGMENT OPTICAL COHERENCE TOMOGRAPHY (AS-OCT) IS A RAPIDLY EVOLVING AREA OF OCT IMAGING, PROVIDING HIGH-RESOLUTION AND NON-INVASIVE VOLUMETRIC IMAGING OF THE ANTERIOR SEGMENT. THIS REVIEW FOCUSES ON RECENT ADVANCES IN AS-OCT IMAGING IN SMALL ANIMALS, WHICH WE CATEGORIZE INTO ULTRAHIGH-RESOLUTION, SPECTROSCOPIC, MAGNETOMOTIVE, POLARIZATION-SENSITIVE, AND ANGIOGRAPHIC AS-OCTS. WE SUMMARIZE…				222	NORTHWESTERN UNIV, DEPT BIOMED ENGN, EVANSTON, IL USA.; UNIV ILLINOIS, DEPT OPHTHALMOL & VISUAL SCI, CHICAGO, IL USA.; HUAZHONG UNIV SCI & TECHNOL, TONGJI MED COLL, DEPT OPHTHALMOL, WUHAN, HUBEI, PEOPLES R CHINA.;	NORTHWESTERN UNIVERSITY; UNIVERSITY OF ILLINOIS SYSTEM; UNIVERSITY OF ILLINOIS CHICAGO; UNIVERSITY OF ILLINOIS CHICAGO HOSPITAL; HUAZHONG UNIVERSITY OF SCIENCE & TECHNOLOGY					2024-02-18	OPTICAL COHERENCE TOMOGRAPHY; ANTERIOR SEGMENT; ANIMAL MODEL	10.1016/j.jtos.2022.08.011	ARTICLE			1937-5913	HFZHANG@NORTHWESTERN.EDU	233		NATIONAL INSTITUTES OF HEALTH [R01EY026078, R01EY029121, R01EY028304, R01EY019949, U01EY033001, R44EY026466, T32GM142604, R01EY024349, P30EY01792]; RESEARCH TO PREVENT BLINDNESS	THE AUTHORS SINCERELY ACKNOWLEDGE THE GENEROUS FUNDING SUPPORT FROM THE NATIONAL INSTITUTES OF HEALTH R01EY026078, R01EY029121, R01EY028304, R01EY019949, U01EY033001, R44EY026466, T32GM142604, R01EY024349, AND P30EY01792; AND UNRESTRICTED GRANTS FROM RESEARCH TO PREVENT BLINDNESS.	K6FH4	CENTRAL CORNEAL THICKNESS; AXIAL RESOLUTION OCT; DRY EYE DISEASE; IN-VIVO; INTRAOCULAR-PRESSURE; MOUSE MODEL; SPECTRAL-DOMAIN; TEAR FILM; MICE; ANGIOGRAPHY		OCUL SURF	OCUL. SURF.	ENGLISH	130	GREEN ACCEPTED, HYBRID	FANG, RAYMOND/0000-0002-0647-8537	RADARWEG 29, 1043 NX AMSTERDAM, NETHERLANDS	OCT	12	AMSTERDAM	36195237	J	ELSEVIER	2022		ZHANG, HF (CORRESPONDING AUTHOR), NORTHWESTERN UNIV, DEPT BIOMED ENGN, EVANSTON, IL USA.	OPHTHALMOLOGY			1542-0124	OCULAR SURFACE
CHO WJ;KIM Y;KIM JD;KIM EW;BAE HW;KIM CY;CHOI W	CHO, WON JEONG;KIM, YITAK;KIM, JUNG DONG;KIM, EUN WOO;BAE, HYOUNG WON;KIM, CHAN YUN;CHOI, WUNGRAK	AUGUSTIN AJ, 2015, BMC OPHTHALMOL, V15, DOI 10.1186/S12886-015-0148-2;BAHADORANI S, 2018, CLIN OPHTHALMOL, V12, P639, DOI 10.2147/OPTH.S148990;BUCOLO C, 2018, J PHARMACOL SCI, V138, P219, DOI 10.1016/J.JPHS.2018.11.001;CARREON T, 2017, PROG RETIN EYE RES, V57, P108, DOI 10.1016/J.PRETEYERES.2016.12.004;CHANG-LIN JE, 2011, INVEST OPHTH VIS SCI, V52, P80, DOI 10.1167/IOVS.10-5285;CHEN M, 2019, BMC …	IT IS IMPORTANT TO IDENTIFY AT-RISK PATIENTS PRIOR TO ADMINISTERING STEROID INJECTIONS TO PREVENT AVOIDABLE IRREVERSIBLE BLINDNESS INDUCTED BY STEROID-INDUCED OCULAR HYPERTENSION (SIOH). WE AIMED TO INVESTIGATE THE ASSOCIATION OF SIOH FOLLOWING INTRAVITREAL DEXAMETHASONE IMPLANTATION (OZURDEX) USING ANTERIOR SEGMENT OPTICAL COHERENCE TOMOGRAPHY (AS-OCT). WE CONDUCTED A RETROSPECTIVE CASE CONTROL …	9143				YONSEI UNIV COLL MED, INST VIS RES, DEPT OPHTHALMOL, SEOUL, SOUTH KOREA.;	YONSEI UNIVERSITY; YONSEI UNIVERSITY HEALTH SYSTEM					2024-02-18		10.1038/s41598-023-36329-4	ARTICLE				WUNGRAKCHOI@YUHS.AC			BASIC SCIENCE RESEARCH PROGRAM THROUGH THE NATIONAL RESEARCH FOUNDATION OF KOREA [NRF- 2019R1I1A1A01061721, 2022R1I1A1A01071919]; 2022 CHEIL-NAMMYUNG FOUNDATION RESEARCH FUNDS; GANGNAM SEVERANCE HOSPITAL, YONSEI UNIVERSITY COLLEGE OF MEDICINE; YONSEI UNIVERSITY COLLEGE OF MEDICINE [6-2020-0139]	THIS WORK WAS SUPPORTED BY THE BASIC SCIENCE RESEARCH PROGRAM THROUGH THE NATIONAL RESEARCH FOUNDATION OF KOREA (NRF- 2019R1I1A1A01061721 & 2022R1I1A1A01071919), 2022 CHEIL-NAMMYUNG FOUNDATION RESEARCH FUNDS, THE RESEARCH GRANT FROM GANGNAM SEVERANCE HOSPITAL, YONSEI UNIVERSITY COLLEGE OF MEDICINE, AND BY A FACULTY RESEARCH GRANT OF YONSEI UNIVERSITY COLLEGE OF MEDICINE (6-2020-0139). THE FUNDING…	L4HT0	DEXAMETHASONE INTRAVITREAL IMPLANT; GLAUCOMA; OZURDEX	1	SCI REP-UK	SCI REP	ENGLISH	33	GOLD, GREEN PUBLISHED	KIM, CHAN YUN/0000-0002-8373-9999; CHOI, WUNGRAK/0000-0002-3015-2502; BAE, HYOUNG WON/0000-0002-8421-5636	HEIDELBERGER PLATZ 3, BERLIN, 14197, GERMANY	JUN 5	9	BERLIN	37277443	J	NATURE PORTFOLIO	2023		CHOI, W (CORRESPONDING AUTHOR), YONSEI UNIV COLL MED, INST VIS RES, DEPT OPHTHALMOL, SEOUL, SOUTH KOREA.	SCIENCE & TECHNOLOGY - OTHER TOPICS			2045-2322	SCIENTIFIC REPORTS
GHADAMZADEH M;KARIMI F;MOGHADDAM SG;DANESHVAR R	GHADAMZADEH, MOJTABA;KARIMI, FARSHID;MOGHADDAM, SOMAYEH GHASEMI;DANESHVAR, RAMIN	AZUARA-BLANCO A, 2016, LANCET, V388, P1389, DOI 10.1016/S0140-6736(16)30956-4;BAIG NAFEES, 2016, OPEN OPHTHALMOL J, V10, P86, DOI 10.2174/1874364101610010086;BARBOSA DTQ, 2013, INT J OPHTHALMOL-CHI, V6, P406, DOI 10.3980/J.ISSN.2222-3959.2013.03.28;BROWN RH, 2014, J CATARACT REFR SURG, V40, P1610, DOI 10.1016/J.JCRS.2014.01.038;BROWN RH, 2014, J CATARACT REFR SURG, V40, P1255, DOI 10.1016/J.JCRS.…	PRECIS: WE USED ANTERIOR SEGMENT OPTICAL COHERENCE TOMOGRAPHY TO INVESTIGATE ANTERIOR CHAMBER ANGLE IN PRIMARY ANGLE-CLOSURE GLAUCOMA (PACG) EYES FOLLOWING PHACOEMULSIFICATION AND PHACOTRABECULECTOMY. ANGLE WIDENING WAS SIGNIFICANTLY GREATER AFTER PHACOEMULSIFICATION UP TO 6 MONTHS AFTER THE SURGERY. PURPOSE: TO COMPARE ANTERIOR CHAMBER ANGLE FOLLOWING 2 COMMON SURGERIES FOR PACG. METHODS: ONE HU…				147	MASHHAD UNIV MED SCI, EYE RES CTR, MASHHAD, RAZAVI KHORASAN, IRAN.; UNIV FLORIDA, DEPT OPHTHALMOL, POB 100284, GAINESVILLE, FL 32610 USA.;	MASHHAD UNIVERSITY MEDICAL SCIENCE; STATE UNIVERSITY SYSTEM OF FLORIDA; UNIVERSITY OF FLORIDA					2024-02-18	PRIMARY ANGLE-CLOSURE GLAUCOMA; PHACOEMULSIFICATION; PHACOTRABECULECTOMY; ANTERIOR CHAMBER ANGLE; ANTERIOR SEGMENT OPTICAL COHERENCE TOMOGRAPHY	10.1097/IJG.0000000000001977	ARTICLE			1536-481X	RADANESHVAR@GMAIL.COM	155		VICECHANCELLOR OF RESEARCH AT MASHHAD UNIVERSITY OF MEDICAL SCIENCES [930126]	THE STUDY WAS SUPPORTED BY A RESEARCH GRANT (NO. 930126) FROM THE VICECHANCELLOR OF RESEARCH AT MASHHAD UNIVERSITY OF MEDICAL SCIENCES. THE FUNDING BODY HAD GENERAL SUPERVISION ON THE CLINICAL TRIAL AND ITS ETHICAL PERSPECTIVE AND RESEARCH PROTOCOL; HOWEVER, IT DID NOT INTERVENE IN THE STUDY.	6I4AS	OPTICAL COHERENCE TOMOGRAPHY; CLEAR LENS EXTRACTION; INTRAOCULAR-PRESSURE; CATARACT-SURGERY; ULTRASOUND BIOMICROSCOPY; DRAINAGE ANGLE; CHINESE PATIENTS; SCLERAL SPUR; EYES; TRABECULECTOMY	3	J GLAUCOMA	J. GLAUCOMA	ENGLISH	78			TWO COMMERCE SQ, 2001 MARKET ST, PHILADELPHIA, PA 19103 USA	MAR	9	PHILADELPHIA	35210384	J	LIPPINCOTT WILLIAMS & WILKINS	2022		DANESHVAR, R (CORRESPONDING AUTHOR), UNIV FLORIDA, DEPT OPHTHALMOL, POB 100284, GAINESVILLE, FL 32610 USA.	OPHTHALMOLOGY			1057-0829	JOURNAL OF GLAUCOMA
PÉREZ-RICO C;GUTIÉRREZ-ORTÍZ C;MORENO-SALGUEIRO A;GONZÁLEZ-MESA A;TEUS MA	PEREZ-RICO, CONSUELO;GUTIERREZ-ORTIZ, CONSUELO;MORENO-SALGUEIRO, AGUSTIN;GONZALEZ-MESA, ANA;TEUS, MIGUEL A.	AMBRESIN A, 2002, J GLAUCOMA, V11, P214, DOI 10.1097/00061198-200206000-00009;APTEL F, 2009, EUR J OPHTHALMOL, V19, P223, DOI 10.1177/112067210901900208;BISSIG A, 2008, J GLAUCOMA, V17, P680, DOI 10.1097/IJG.0B013E318182ED9E;CABREJAS L, 2011, EUR J OPHTHALMOL, V21, P391, DOI 10.5301/EJO.2010.5843;CHENG JW, 2004, CHINESE MED J-PEKING, V117, P1006;DELARIVE T, 2003, BRIT J OPHTHALMOL, V87, P1340, DO…	PURPOSE:TO ASSESS LONG-TERM INTRASCLERAL SPACE MAINTENANCE AFTER NONPENETRATING DEEP SCLERECTOMY (NPDS) WITHOUT IMPLANT PLACEMENT AND WITH APPLICATION OF INTRAOPERATIVE MITOMYCIN-C, USING VISANTE ANTERIOR SEGMENT OPTICAL COHERENCE TOMOGRAPHY (AS-OCT).PATIENTS AND METHODS:THIS CROSS-SECTIONAL, OBSERVATIONAL, CASE SERIES STUDY EXAMINED 47 EYES FROM 47 CONSECUTIVE PATIENTS WHO HAD UNDERGONE NPDS 58.…				E86	UNIV ALCALA, DEPT OPHTHALMOL, UNIV HOSP PRINCIPE DE ASTURIAS, MADRID 28805, SPAIN.;	PRINCE OF ASTURIAS UNIVERSITY HOSPITAL; UNIVERSIDAD DE ALCALA					2024-02-18	NONPENETRATING DEEP SCLERECTOMY; INTRASCLERAL LAKE; VISANTE ANTERIOR SEGMENT OPTICAL COHERENCE TOMOGRAPHY; INTRAOCULAR PRESSURE; GLAUCOMA	10.1097/IJG.0b013e31829ea2c8	ARTICLE			1536-481X	CINTA.PEREZRICO@GMAIL.COM	E90		FUNDACION PARA LA INVESTIGACION BIOMEDICA DEL HOSPITAL UNIVERSITARIO PRINCIPE DE ASTURIAS	SUPPORTED IN PART BY FUNDACION PARA LA INVESTIGACION BIOMEDICA DEL HOSPITAL UNIVERSITARIO PRINCIPE DE ASTURIAS. THE AUTHORS DECLARE NO CONFLICT OF INTEREST.	291CL	INTRASCLERAL BLEB HEIGHT; COLLAGEN IMPLANT; ULTRASOUND BIOMICROSCOPY; FILTERING BLEBS; FOLLOW-UP; ONE EYE; TRABECULECTOMY; SURGERY; GLAUCOMA; OCT	1	J GLAUCOMA	J. GLAUCOMA	ENGLISH	25		GUTIERRE, CONSUELO/0000-0002-3710-9961; TEUS, MIGUEL A./0000-0002-3835-9882	TWO COMMERCE SQ, 2001 MARKET ST, PHILADELPHIA, PA 19103 USA	JAN	5	PHILADELPHIA	24370813	J	LIPPINCOTT WILLIAMS & WILKINS	2014	GUTIERRE, CONSUELO/ADK-1333-2022; TEUS, MIGUEL A./AAW-1835-2020	PÉREZ-RICO, C (CORRESPONDING AUTHOR), UNIV ALCALA, DEPT OPHTHALMOL, UNIV HOSP PRINCIPE DE ASTURIAS, CARRETERA ALCALA MECO S-N, MADRID 28805, SPAIN.	OPHTHALMOLOGY			1057-0829	JOURNAL OF GLAUCOMA
TRIOLO G;BARBONI P;SAVINI G;DE GAETANO F;MONACO G;DAVID A;SCIALDONE A	TRIOLO, GIACINTO;BARBONI, PIERO;SAVINI, GIACOMO;DE GAETANO, FRANCESCO;MONACO, GASPARE;DAVID, ALESSANDRO;SCIALDONE, ANTONIO	CROWELL EL, 2020, J GLAUCOMA, V29, P1036, DOI 10.1097/IJG.0000000000001664;ESAKI K, 2000, JPN J OPHTHALMOL, V44, P46, DOI 10.1016/S0021-5155(99)00173-2;ESFANDIARI H, 2018, GRAEF ARCH CLIN EXP, V256, P2173, DOI 10.1007/S00417-018-4092-8;HASHEMI H, 2019, INT OPHTHALMOL, V39, P2033, DOI 10.1007/S10792-018-1037-5;HOW AC, 2012, OPHTHALMOLOGY, V119, DOI 10.1016/J.OPHTHA.2012.01.019;HUANG GF, 2011, ARCH…	THE INTRODUCTION OF ANTERIOR-SEGMENT OPTICAL-COHERENCE TOMOGRAPHY (AS-OCT) HAS LED TO IMPROVED ASSESSMENTS OF THE ANATOMY OF THE IRIDOCORNEAL-ANGLE AND DIAGNOSES OF SEVERAL MECHANISMS OF ANGLE CLOSURE WHICH OFTEN RESULT IN RAISED INTRAOCULAR PRESSURE (IOP). CONTINUOUS ADVANCEMENTS IN AS-OCT TECHNOLOGY AND SOFTWARE, ALONG WITH AN EXTENSIVE RESEARCH IN THE FIELD, HAVE RESULTED IN A WIDE RANGE OF PO…	231				ASST FATEBENEFRATELLI SACCO, OPHTHALM INST, I-20121 MILAN, ITALY.; UNIV VITA SALUTE, SAN RAFFAELE SCI INST, I-20133 MILAN, ITALY.; STUDIO OCULIST DAZEGLIO, I-40123 BOLOGNA, ITALY.; GB BIETTI FDN IRCCS, I-00198 ROME, ITALY.;	VITA-SALUTE SAN RAFFAELE UNIVERSITY; IRCCS OSPEDALE SAN RAFFAELE; IRCCS - FONDAZIONE "G.B. BIETTI" PER LO STUDIO E LA RICERCA IN OFTALMOLOGIA					2024-02-18	AS-OCT; GLAUCOMA; IRIDOCORNEAL ANGLE; PRIMARY-ANGLE CLOSURE; PLATEAU-IRIS CONFIGURATION	10.3390/jcm10020231	REVIEW			2077-0383	GIACINTO.TRIOLO@GMAIL.COM; P.BARBONI60@GMAIL.COM; GIACOMO.SAVINI@FONDAZIONEBIETTI.IT; FRANCESCO.DEGAETANO@ASST-FBF-SACCO.IT; GASPARE.MONACO@ASST-FBF-SACCO.IT; ALESSANDRO.DAVID@ASST-FBF-SACCO.IT; ANTONIO.SCIALDONE@ASST-FBF-SACCO.IT			FONDAZIONE ROMA; ITALIAN MINISTRY OF HEALTH	THE AUTHORS THANK COSTRUZIONI STRUMENTI OFTALMICI (CSO) ITALY FOR THEIR CONTRIBUTE IN PROVIDING AS-OCT SCAN IMAGES INCLUDED IN THE PRESENT MANUSCRIPT. THE CONTRIBUTION OF G.B. BIETTI FOUNDATION I.R.C.S.S. WAS SUPPORTED BY FONDAZIONE ROMA AND ITALIAN MINISTRY OF HEALTH.	PX4AP		2	J CLIN MED	J. CLIN. MED.	ENGLISH	34	GREEN PUBLISHED, GOLD	SAVINI, GIACOMO/0000-0003-0075-3582; TRIOLO, GIACINTO/0000-0001-7681-8069	ST ALBAN-ANLAGE 66, CH-4052 BASEL, SWITZERLAND	JAN	11	BASEL	33440631	J	MDPI	2021	SAVINI, GIACOMO/J-9196-2018	TRIOLO, G (CORRESPONDING AUTHOR), ASST FATEBENEFRATELLI SACCO, OPHTHALM INST, I-20121 MILAN, ITALY.	GENERAL & INTERNAL MEDICINE				JOURNAL OF CLINICAL MEDICINE
GARCIA JPS;ROSEN RB	GARCIA, JULIAN P. S., JR.;ROSEN, RICHARD B.	DADA T, 2007, J CATARACT REFR SURG, V33, P837, DOI 10.1016/J.JCRS.2007.01.021;GARCIA JPS, 2005, OPHTHAL SURG LAS IM, V36, P139;GARCIA JPS, 2008, CORNEA, V27, P180, DOI 10.1097/ICO.0B013E318159BC7D;GARCIA JPS, 2007, OPHTHAL SURG LAS IM, V38, P314, DOI 10.3928/15428877-20070701-07;GOLDSMITH JA, 2005, OPHTHALMOLOGY, V112, P238, DOI 10.1016/J.OPHTHA.2004.09.019;HOERAUF H, 2000, OPHTHALMIC SURG LAS, V…	BACKGROUND AND OBJECTIVE: TO DETERMINE THE CLINICAL INDICATIONS OF ANTERIOR SEGMENT OPTICAL COHERENCE TOMOGRAPHY (AS-OCT) AND ULTRASOUND BIOMICROSCOPY IN ANTERIOR SEGMENT IMAGING. PATIENTS AND METHODS: EIGHTY PATIENTS WERE EVALUATED USING AS-OCT AND ULTRASOUND BIOMICROSCOPY. RESULTS: AS-OCT WAS IDEAL FOR DETAILED IMAGING OF STRUCTURES FROM THE SURFACE OF THE EYE TO THE IRIS PLANE. ULTRASOUND BIOM…				476	NEW YORK EYE & EAR INFIRM, RETINA CTR, NEW YORK, NY 10003 USA.; NEW YORK MED COLL, VALHALLA, NY 10595 USA.;	NEW YORK EYE & EAR INFIRMARY OF MOUNT SINAI; NEW YORK MEDICAL COLLEGE		FT LAUDERDALE, FL	5TH ANNUAL MEETING OF THE INTERNATIONAL-SOCIETY-FOR-IMAGING-IN-THE-EYE	MAY 04, 2007	2024-02-18		10.3928/15428877-20081101-02	ARTICLE; PROCEEDINGS PAPER					484				371TO		6	OPHTHAL SURG LAS IM	OPHTHALMIC SURG. LASERS IMAGING	ENGLISH	14			6900 GROVE RD, THOROFARE, NJ 08086 USA	NOV-DEC	9	THOROFARE	19065978	J	SLACK INC	2008		GARCIA, JPS (CORRESPONDING AUTHOR), NEW YORK EYE & EAR INFIRM, RETINA CTR, 310 E 14TH ST, NEW YORK, NY 10003 USA.	OPHTHALMOLOGY; SURGERY			1542-8877	OPHTHALMIC SURGERY LASERS & IMAGING
MA XY;ZHU D;ZOU J;ZHANG WJ;CAO YL	MA, XIAO-YUN;ZHU, DAN;ZOU, JUN;ZHANG, WEN-JIE;CAO, YI-LIN	ANG LPK, 2000, OPHTHALMOLOGY, V107, P2092, DOI 10.1016/S0161-6420(00)00360-2;APTEL F, 2014, J REFRACT SURG, V30, P354, DOI 10.3928/1081597X-20140326-01;DADA T, 2007, EYE, V21, P956, DOI 10.1038/SJ.EYE.6702360;DADA T, 2007, J CATARACT REFR SURG, V33, P837, DOI 10.1016/J.JCRS.2007.01.021;EMANUEL ME, 2014, CURR OPIN OPHTHALMOL, V25, P89, DOI 10.1097/ICU.0000000000000028;GOLD ME, 2013, BIOMED RES INT…	AIM: TO QUANTITATIVELY ASSESS NARROW ANTERIOR CHAMBER ANGLE USING SPECTRAL-DOMAIN ANTERIOR SEGMENT OPTICAL COHERENCE TOMOGRAPHY (SD-AS-OCT) AND ULTRASOUND BIOMICROSCOPY (UBM), AND TO EVALUATE THE CORRELATIONS AND CONSISTENCY BETWEEN SD-AS-OCT AND UBM. METHODS: FIFTY-FIVE EYES FROM 40 PATIENTS WERE EXAMINED. PATIENTS WERE DIAGNOSED WITH PRIMARY ANGLE-CLOSURE GLAUCOMA (PACG) REMISSION (11 EYES FROM…				417	SHANGHAI JIAO TONG UNIV, SCH MED, SHANGHAI KEY LAB TISSUE ENGN,NATL TISSUE ENGN CTR, DEPT PLAST & RECONSTRUCT SURG,SHANGHAI PEOPLES HO, SHANGHAI 200011, PEOPLES R CHINA.; SHANGHAI GUANGHUA INTEGRAT MED HOSP, DEPT OPHTHALMOL, SHANGHAI 200052, PEOPLES R CHINA.; TONGJI UNIV, SHANGHAI PEOPLES HOSP 10, DEPT OPHTHALMOL, SHANGHAI 200072, PEOPLES R CHINA.;	SHANGHAI JIAO TONG UNIVERSITY; TONGJI UNIVERSITY					2024-02-18	PRIMARY ANGLE-CLOSURE GLAUCOMA; ULTRASOUND BIOMICROSCOPY; SPECTRAL-DOMAIN ANTERIOR SEGMENT OPTICAL COHERENCE TOMOGRAPHY; LASER PERIPHERAL IRIDOTOMY		ARTICLE			2227-4898	ZOUJUN70@126.COM	423				DG0KB	PRIMARY ANGLE-CLOSURE; EUROPEAN EYES; FOLLOW-UP; GLAUCOMA; POPULATION; BIOMETRY; CHINESE; PARAMETERS; MORPHOLOGY; SUSPECTS	3	INT J OPHTHALMOL-CHI	INT. J. OPHTHALMOL.	ENGLISH	27	GREEN PUBLISHED, GOLD, GREEN SUBMITTED		NO 269 YOUYI EAST RD, XI AN, 710054, PEOPLES R CHINA	MAR 18	7	XI AN	27158613	J	IJO PRESS	2016		ZOU, J (CORRESPONDING AUTHOR), SHANGHAI TONGJI UNIV, SHANGHAI PEOPLES HOSP 10, DEPT OPHTHALMOL, 301 YANCHANG MIDDLE RD, SHANGHAI 200072, PEOPLES R CHINA.	OPHTHALMOLOGY			2222-3959	INTERNATIONAL JOURNAL OF OPHTHALMOLOGY
PASAOGLU I;BASARIR B	PASAOGLU, ISIL;BASARIR, BERNA	BASARIR B, 2013, INT OPHTHALMOL, V33, P245, DOI 10.1007/S10792-012-9680-8;DI PIPPO M, 2020, CASE REP OPHTHALM, V11, P377, DOI 10.1159/000508605;DINC UA, 2010, EUR J OPHTHALMOL, V20, P702;ELGIN U, 2018, TURK OFTALMOL DERG, V48, P295, DOI 10.4274/TJO.68915;GUPTA V, 2018, J GLAUCOMA, V27, PE87, DOI 10.1097/IJG.0000000000000887;GUPTA V, 2013, GRAEF ARCH CLIN EXP, V251, P1571, DOI 10.1007/S00417-013-2…	PURPOSE: TO COMPARE THE QUANTITATIVE MEASUREMENTS OF THE ANTERIOR CHAMBER ANGLE (ACA) AND IRIS PARAMETERS IN PATIENTS WITH JUVENILE OPEN-ANGLE GLAUCOMA (JOAG), PIGMENTARY GLAUCOMA (PG), AND HEALTHY CONTROLS USING ANTERIOR SEGMENT OPTICAL COHERENCE TOMOGRAPHY (AS-OCT). METHODS: THIS WAS A RETROSPECTIVE, CROSS-SECTIONAL STUDY OF 25 EYES WITH JOAG, 25 EYES WITH PG, AND 25 CONTROL EYES. ANTERIOR CHAM…				558	UNIV HLTH SCI, BEYOGLU EYE TRAINING & RES HOSP, DEPT GLAUCOMA, ISTANBUL, TURKEY.;	UNIVERSITY OF HEALTH SCIENCES TURKEY					2024-02-18	ANTERIOR CHAMBER ANGLE; ANTERIOR-SEGMENT OPTICAL-COHERENCE TOMOGRAPHY; IRIS THICKNESS; JUVENILE OPEN-ANGLE GLAUCOMA; PIGMENTARY GLAUCOMA	10.4103/ijo.IJO_2012_21	ARTICLE			1998-3689	IBASGIL@YAHOO.COM	563				5E8IA	OPTICAL COHERENCE TOMOGRAPHY; ULTRASOUND BIOMICROSCOPY; REPRODUCIBILITY; CLOSURE	2	INDIAN J OPHTHALMOL	INDIAN J. OPHTHALMOL.	ENGLISH	21	GREEN PUBLISHED, GOLD		WOLTERS KLUWER INDIA PVT LTD , A-202, 2ND FLR, QUBE, C T S NO 1498A-2 VILLAGE MAROL, ANDHERI EAST, MUMBAI, MAHARASHTRA, INDIA	FEB	6	MUMBAI	35086237	J	WOLTERS KLUWER MEDKNOW PUBLICATIONS	2022	PASAOGLU, ISIL/JJE-4958-2023	PASAOGLU, I (CORRESPONDING AUTHOR), SELALE ST,MANOLYA APT B1-32, ISTANBUL, TURKEY.	OPHTHALMOLOGY			0301-4738	INDIAN JOURNAL OF OPHTHALMOLOGY
ÖZER MA;OGUREL T;ÖZEN S;KÜÇÜKSÜMER Y	OZER, MURAT ATABEY;OGUREL, TEVFIK;OZEN, SERKAN;KUCUKSUMER, YASAR	ALVARADO JA, 2005, BRIT J OPHTHALMOL, V89, P1500, DOI 10.1136/BJO.2005.081307;ALVARADO JA, 2010, AM J OPHTHALMOL, V150, P254, DOI 10.1016/J.AJO.2010.03.012;ALVARADO JA, 2010, ARCH OPHTHALMOL-CHIC, V128, P731, DOI 10.1001/ARCHOPHTHALMOL.2010.85;BRADLEY JMB, 2000, INVEST OPHTH VIS SCI, V41, P422;CVENKEL B, 2003, LASER SURG MED, V33, P204, DOI 10.1002/LSM.10203;EL-HADDAD NSEM, 2019, LASER MED SCI, V…	TO PROSPECTIVELY EXAMINE THE EFFECTS OF SELECTIVE LASER TRABECULOPLASTY (SLT) ON THE ANTERIOR CHAMBER ANGLE (ACA) AND ITS RELATED PARAMETERS USING ANTERIOR SEGMENT-OPTIC COHERENCE TOMOGRAPHY (AS-OCT). FIFTY EYES OF 50 PATIENTS WITH PRIMARY OPEN ANGLE GLAUCOMA (POAG) AND OCULAR HYPERTENSION WERE INCLUDED IN THE STUDY. AS-OCT WAS PERFORMED BEFORE SLT APPLICATION, IMMEDIATELY AFTER AND AT 1 DAY AND …				1271	GIRESUN UNIV, SECT SURG SCI, DEPT OPHTHALMOL, FAC MED, TR-28100 DEBBOY, GIRESUN, TURKEY.; KIRIKKALE UNIV, SECT SURG SCI, DEPT OPHTHALMOL, FAC MED, KIRIKKALE, TURKEY.;	GIRESUN UNIVERSITY; KIRIKKALE UNIVERSITY					2024-02-18	SELECTIVE LASER TRABECULOPLASTY; ANTERIOR SEGMENT OPTICAL TOMOGRAPHY; GLAUCOMA	10.1007/s10103-019-02904-3	ARTICLE; EARLY ACCESS	NOV 2019		1435-604X	DRATABEYOZER@YANDEX.COM	1275				MH8EA	TRABECULAR MESHWORK; AQUEOUS OUTFLOW; CELLS; LINE	6	LASER MED SCI	LASERS MED. SCI.	ENGLISH	22		ÖZER, MURAT ATABEY/0000-0003-1807-6911	236 GRAYS INN RD, 6TH FLOOR, LONDON WC1X 8HL, ENGLAND	2020 AUG	5	LONDON	31713002	J	SPRINGER LONDON LTD	2020	ÖZER, MURAT ATABEY/ISV-0275-2023	ÖZER, MA (CORRESPONDING AUTHOR), GIRESUN UNIV, SECT SURG SCI, DEPT OPHTHALMOL, FAC MED, TR-28100 DEBBOY, GIRESUN, TURKEY.	ENGINEERING; SURGERY			0268-8921	LASERS IN MEDICAL SCIENCE
NIWAS SI;LIN WS;KWOH CK;KUO CCJ;SNG CC;AQUINO MC;CHEW PTK	NIWAS, SWAMIDOSS ISSAC;LIN, WEISI;KWOH, CHEE KEONG;KUO, C. -C. JAY;SNG, CHELVIN C.;AQUINO, MARIA CECILIA;CHEW, PAUL T. K.	ACHARYA UR, 2011, IEEE T INF TECHNOL B, V15, P449, DOI 10.1109/TITB.2011.2119322;ANONYMOUS, MYSTERY GLAUCOMA;BLOCH RALPH F, 2003, BMC MED EDUC, V3, P1, DOI 10.1186/1472-6920-3-1;CHAN KL, 2002, IEEE T BIO-MED ENG, V49, P963, DOI 10.1109/TBME.2002.802012;COYNE A., 2012, REV OPTOMETRY;DA CUNHA AL, 2006, IEEE T IMAGE PROCESS, V15, P3089, DOI 10.1109/TIP.2006.877507;DING C, 2003, PROCEEDINGS OF THE 20…	EFFECTIVE FEATURE SELECTION PLAYS A VITAL ROLE IN ANTERIOR SEGMENT IMAGING FOR DETERMINING THE MECHANISM INVOLVED IN ANGLE-CLOSURE GLAUCOMA (ACG) DIAGNOSIS. THIS RESEARCH FOCUSES ON THE USE OF REDUNDANT FEATURES FOR COMPLEX DISEASE DIAGNOSIS SUCH AS ACG USING ANTERIOR SEGMENT OPTICAL COHERENCE TOMOGRAPHY IMAGES. BOTH SUPERVISED [MINIMUM REDUNDANCY MAXIMUM RELEVANCE (MRMR)] AND UNSUPERVISED [LAPLA…				343	NANYANG TECHNOL UNIV, SCH COMP ENGN, SINGAPORE 639798, SINGAPORE.; UNIV SO CALIF, MING HSIEH DEPT ELECT ENGN, SIGNAL & IMAGE PROC INST, LOS ANGELES, CA 90089 USA.; NATL UNIV HLTH SYST, EYE SURG CTR, SINGAPORE 119228, SINGAPORE.; NATL UNIV SINGAPORE, YONG LOO LIN SCH MED, DEPT OPHTHALMOL, SINGAPORE 119228, SINGAPORE.;	NANYANG TECHNOLOGICAL UNIVERSITY; UNIVERSITY OF SOUTHERN CALIFORNIA; NATIONAL UNIVERSITY OF SINGAPORE; NATIONAL UNIVERSITY OF SINGAPORE					2024-02-18	ANGLE-CLOSURE GLAUCOMA (ACG); ANTERIOR SEGMENT OPTICAL COHERENCE TOMOGRAPHY (AS-OCT); UNSUPERVISED FEATURE SELECTION; REDUNDANT FEATURES; LAPLACIAN SCORE (L-SCORE); MINIMUM REDUNDANCY MAXIMUM RELEVANCE (MRMR); MACHINE LEARNING CLASSIFIER	10.1109/JBHI.2014.2387207	ARTICLE			2168-2208	ISSACNIWAS@NTU.EDU.SG; WSLIN@NTU.EDU.SG; ASCKKWOH@NTU.EDU.SG; CCKUO@SIPI.USC.EDU; CHELVIN@GMAIL.COM; MCDAQUINO@GMAIL.COM; OPHCHEWP@NUS.EDU.SG	354		MINISTRY OF EDUCATION ACRF TIRE 1 FUNDING, SINGAPORE [M4010981.020 RG36/11]	THIS WORK WAS SUPPORTED BY THE MINISTRY OF EDUCATION ACRF TIRE 1 FUNDING, SINGAPORE, UNDER GRANT M4010981.020 RG36/11.	DH2PX	FEATURE-SELECTION	1	IEEE J BIOMED HEALTH	IEEE J. BIOMED. HEALTH INFORM.	ENGLISH	27		LIN, WEISI/0000-0001-9866-1947; KWOH, C K/0000-0002-8547-6387; LIN, WEISI/0000-0001-9866-1947; KUO, C.-C. JAY/0000-0001-9474-5035; SNG, CHELVIN/0000-0002-9837-6019	445 HOES LANE, PISCATAWAY, NJ 08855-4141 USA	JAN	12	PISCATAWAY	25561599	J	IEEE-INST ELECTRICAL ELECTRONICS ENGINEERS INC	2016	LIN, WEISI/A-8011-2012; KWOH, C K/A-3727-2011; SWAMIDOSS, ISSAC NIWAS/AAZ-1920-2020; LIN, WEISI/A-3696-2011; KUO, C.-C. JAY/A-7110-2011	NIWAS, SI; LIN, WS; KWOH, CK (CORRESPONDING AUTHOR), NANYANG TECHNOL UNIV, SCH COMP ENGN, SINGAPORE 639798, SINGAPORE.; KUO, CCJ (CORRESPONDING AUTHOR), UNIV SO CALIF, MING HSIEH DEPT ELECT ENGN, SIGNAL & IMAGE PROC INST, LOS ANGELES, CA 90089 USA.; AQUINO, MC (CORRESPONDING AUTHOR), NATL UNIV HLTH SYST, EYE SURG CTR, SINGAPORE 119228, SINGAPORE.; SNG, CC; CHEW, PTK (CORRESPONDING AUTHOR), NATL U…	COMPUTER SCIENCE; MATHEMATICAL & COMPUTATIONAL BIOLOGY; MEDICAL INFORMATICS			2168-2194	IEEE JOURNAL OF BIOMEDICAL AND HEALTH INFORMATICS
GIGLIO R;INFERRERA L;DE GIACINTO C;D'ALOISIO R;BECCASTRINI A;VINCIGUERRA AL;PERROTTA AA;TORO MD;ZWEIFEL S;TOGNETTO D	GIGLIO, ROSA;INFERRERA, LEANDRO;DE GIACINTO, CHIARA;D'ALOISIO, ROSSELLA;BECCASTRINI, ANDREA;VINCIGUERRA, ALEX LUCIA;PERROTTA, ALBERTO ARMANDO;TORO, MARIO DAMIANO;ZWEIFEL, SANDRINE;TOGNETTO, DANIELE	ALTAN C, 2004, J CATARACT REFR SURG, V30, P832, DOI 10.1016/J.JCRS.2003.08.023;CHO YK, 2008, J CATARACT REFR SURG, V34, P1104, DOI 10.1016/J.JCRS.2008.03.023;CUMBA RJ, 2012, J OPHTHALMOL, V2012, DOI 10.1155/2012/487309;DADA T, 2015, J CATARACT REFR SURG, V41, P1470, DOI 10.1016/J.JCRS.2014.10.029;DOGANAY S, 2010, ACTA OPHTHALMOL, V88, P601, DOI 10.1111/J.1755-3768.2008.01446.X;DOOLEY I, 2010, EYE…	BACKGROUND IT IS KNOWN THAT CATARACT EXTRACTION IS ASSOCIATED WITH A SIGNIFICANT REDUCTION IN INTRAOCULAR PRESSURE, ESPECIALLY IN NARROW ANGLED EYES; HOWEVER, THE MODIFICATIONS OF ANTERIOR SEGMENT PARAMETERS ASSOCIATED WITH THIS PHENOMENON HAVE STILL NOT BEEN COMPLETELY DEFINED. THE PURPOSE OF THIS STUDY WAS TO EVALUATE CHANGES IN ANTERIOR SEGMENT ANATOMY AND INTRAOCULAR PRESSURE AFTER CATARACT S…				449	UNIV TRIESTE, DEPT MED SURG & HLTH SCI, EYE CLIN, TRIESTE, ITALY.; UNIV GD ANNUNZIO CHIETI PESCARA, DEPT MED & SCI AGEING, OPHTHALMOL CLIN, CHIETI, ITALY.; UNIV NAPLES FEDERICO II, DEPT PUBL HLTH, EYE CLIN, NAPLES, ITALY.; MED UNIV LUBLIN, CHAIR & DEPT GEN & PAEDIAT OPHTHALMOL, LUBLIN, POLAND.; UNIV ZURICH, UNIV HOSP ZURICH, DEPT OPHTHALMOL, ZURICH, SWITZERLAND.; UNIV TRIESTE, DEPT MED SURG & HLT…	UNIVERSITY OF TRIESTE; G D'ANNUNZIO UNIVERSITY OF CHIETI-PESCARA; UNIVERSITY OF NAPLES FEDERICO II; MEDICAL UNIVERSITY OF LUBLIN; UNIVERSITY OF ZURICH; UNIVERSITY ZURICH HOSPITAL; UNIVERSITY OF TRIESTE					2024-02-18	INTRAOCULAR PRESSURE; CATARACT SURGERY; ANTERIOR SEGMENT OCT; ANTERIOR SEGMENT MORPHOLOGY	10.1055/a-2013-2374	ARTICLE			1439-3999		455				F8MC9	ANGLE-CLOSURE GLAUCOMA; CLEAR CORNEAL PHACOEMULSIFICATION; LENS IMPLANTATION; CHAMBER DEPTH; UNEVENTFUL PHACOEMULSIFICATION; CLINICAL-OUTCOMES; REDUCTION; PARAMETERS; WIDTH; PREDICTORS	04	KLIN MONATSBL AUGENH	KLINISCHE MONATSBLAT. AUGENHEILKUNDE	ENGLISH	42			RUDIGERSTR 14, D-70469 STUTTGART, GERMANY	APR	7	STUTTGART	37164442	J	GEORG THIEME VERLAG KG	2023		GIGLIO, R (CORRESPONDING AUTHOR), UNIV TRIESTE, DEPT MED SURG & HLTH SCI, EYE CLIN, PIAZZA OSPITALE 1, I-34129 TRIESTE, ITALY.	OPHTHALMOLOGY			0023-2165	KLINISCHE MONATSBLATTER FUR AUGENHEILKUNDE
FRIEDMAN DS;HE MG	FRIEDMAN, DAVID S.;HE, MINGGUANG	ALSBIRK PH, 1976, ACTA OPHTHALMOL, P5;ARKELL SM, 1987, ARCH OPHTHALMOL-CHIC, V105, P482;AUNG T, 2005, OPHTHALMOLOGY, V112, P28, DOI 10.1016/J.OPHTHA.2004.06.033;BAEZ KA, 1992, OPHTHALMIC SURG LAS, V23, P426;BARKAN O, 1957, TRANS AM OPHTHALMOL SOC, V55, P395;BARKAN O, 1954, AM J OPHTHALMOL, V37, P504, DOI 10.1016/0002-9394(54)92201-1;BARKAN O, 1941, AM J OPHTHALMOL, V24, P439;BARKAN O, 1936, AM J …	ANGLE-CLOSURE GLAUCOMA IS A LEADING CAUSE OF IRREVERSIBLE BLINDNESS. DIAGNOSIS AND TREATMENT ARE INTRICATELY RELATED TO ANGLE ASSESSMENT TECHNIQUES. THIS ARTICLE REVIEWS THE LITERATURE ON ANGLE ASSESSMENT AND PROVIDES RECOMMENDATIONS ABOUT OPTIMAL TECHNIQUES BASED ON THE PUBLISHED EVIDENCE. SPECIFICALLY, WE REVIEW GONIOSCOPY, ULTRASOUND BIOMICROSCOPY, AND ANTERIOR SEGMENT OPTICAL COHERENCE TOMOGR…				250	WILMER EYE INST, BALTIMORE, MD 21287 USA.; JOHNS HOPKINS BLOOMBERG SCH PUBL HLTH, BALTIMORE, MD USA.; SUN YAT SEN UNIV, ZHONGSHAN OPHTHALM CTR, STATE KEY LAB OPHTHALMOL, GUANGZHOU 510275, GUANGDONG, PEOPLES R CHINA.;	JOHNS HOPKINS UNIVERSITY; JOHNS HOPKINS MEDICINE; JOHNS HOPKINS UNIVERSITY; JOHNS HOPKINS BLOOMBERG SCHOOL OF PUBLIC HEALTH; SUN YAT SEN UNIVERSITY					2024-02-18	ANGLE CLOSURE; GLAUCOMA; GONIOSCOPY; OCULAR ANATOMY	10.1016/j.survophthal.2007.10.012	REVIEW			1879-3304		273				307QO	GLAUCOMATOUS OPTIC NEUROPATHY; CLOSURE GLAUCOMA; ULTRASOUND BIOMICROSCOPY; EYE SEGMENT; OCCLUDABLE ANGLES; ANALYSIS SYSTEM; INTEROBSERVER REPRODUCIBILITY; SCHEIMPFLUG PHOTOGRAPHY; INTRAOCULAR-PRESSURE; COHERENCE TOMOGRAPHY	3	SURV OPHTHALMOL	SURV. OPHTHALMOL.	ENGLISH	103		HE, MINGGUANG/0000-0002-6912-2810; FRIEDMAN, DAVID/0000-0002-2055-5797	STE 800, 230 PARK AVE, NEW YORK, NY 10169 USA	MAY-JUN	24	NEW YORK	18501270	J	ELSEVIER SCIENCE INC	2008	HE, MING/JDN-0835-2023; HE, MING/HZM-5794-2023; HE, MINGGUANG/AAY-5239-2020	FRIEDMAN, DS (CORRESPONDING AUTHOR), JOHNS HOPKINS UNIV HOSP, 600 N WOLFE ST,WILMER 120, BALTIMORE, MD 21287 USA.	OPHTHALMOLOGY			0039-6257	SURVEY OF OPHTHALMOLOGY
KIM DY;SUNG KR;KANG SY;CHO JW;LEE KS;PARK SB;KIM ST;KOOK MS	KIM, DONG Y.;SUNG, KYUNG R.;KANG, SUNG Y.;CHO, JUNG W.;LEE, KYOUNG S.;PARK, SEONG B.;KIM, SOON T.;KOOK, MICHAEL S.	CONSOLE JW, 2008, BR J OPHTHALMOL, V92, P1575;FOSTER PJ, 2002, BRIT J OPHTHALMOL, V86, P238, DOI 10.1136/BJO.86.2.238;HE MG, 2006, INVEST OPHTH VIS SCI, V47, P4772, DOI 10.1167/IOVS.06-0309;HOERAUF H, 2002, ARCH OPHTHALMOL-CHIC, V120, P816;HOERAUF H, 2000, GRAEF ARCH CLIN EXP, V238, P8, DOI 10.1007/S004170050002;ISHIKAWA H, 2007, BRIT J OPHTHALMOL, V91, P1420, DOI 10.1136/BJO.2007.121038;IZATT JA…	PURPOSE: TO EVALUATE THE BASIC CHARACTERISTICS AND REPRODUCIBILITY OF ANTERIOR CHAMBER ANGLE (ACA) MEASUREMENTS DETERMINED BY ANTERIOR-SEGMENT OPTICAL COHERENCE TOMOGRAPHY (AS-OCT) IN OPEN-ANGLE AND PRIMARY ANGLE CLOSURE SUSPECT (PACS) PATIENTS. METHODS: THIRTY-NINE OPEN-ANGLE AND 18 PACS PATIENTS WERE IMAGED FOR ACA BY AS-OCT. SUBJECTS UNDERWENT IMAGING OF THE NASAL, TEMPORAL AND INFERIOR ACA UN…				435	UNIV ULSAN, COLL MED, ASAN MED CTR, DEPT OPHTHALMOL, SEOUL 138736, SOUTH KOREA.; UNIV CHA, COLL MED, BUNDANG CHA MED CTR, DEPT OPHTHALMOL, SUNG NAM, SOUTH KOREA.;	UNIVERSITY OF ULSAN; ASAN MEDICAL CENTER					2024-02-18	ANTERIOR CHAMBER ANGLE; ANTERIOR-SEGMENT OCT; NARROW ANGLE; REPRODUCIBILITY	10.1111/j.1755-3768.2009.01714.x	ARTICLE				MSKOOK@AMC.SEOUL.KR	441				792KH	ULTRASOUND BIOMICROSCOPY; EYE; GONIOSCOPY; CLOSURE; PREVALENCE; GLAUCOMA; OCT	5	ACTA OPHTHALMOL	ACTA OPHTHALMOL.	ENGLISH	20	BRONZE		COMMERCE PLACE, 350 MAIN ST, MALDEN 02148, MA USA	AUG	7	MALDEN	19925516	J	WILEY-BLACKWELL	2011		KOOK, MS (CORRESPONDING AUTHOR), UNIV ULSAN, COLL MED, ASAN MED CTR, DEPT OPHTHALMOL, 388-1 PUNGNAP 2 DONG, SEOUL 138736, SOUTH KOREA.	OPHTHALMOLOGY			1755-375X	ACTA OPHTHALMOLOGICA
FU HZ;LI F;SUN X;CAO XX;LIAO JG;ORLANDO JI;TAO X;LI YX;ZHANG SH;TAN MK;YUAN CL;BIAN C;XIE RT;LI JC;LI XM;WANG J;GENG L;LI PM;HAO HY;LIU J;KONG Y;REN YY;BOGUNOVIC H;ZHANG XL;XU YW;ZHANG YC;LI NH;YANG CM;LUO H;LI XY;DENG FY;SUN Y;ZHOU RX	FU, HUAZHU;LI, FEI;SUN, XU;CAO, XINGXING;LIAO, JINGAN;ORLANDO, JOSE IGNACIO;TAO, XING;LI, YUEXIANG;ZHANG, SHIHAO;TAN, MINGKUI;YUAN, CHENGLANG;BIAN, CHENG;XIE, RUITAO;LI, JIONGCHENG;LI, XIAOMENG;WANG, JING;GENG, LE;LI, PANMING;HAO, HUAYING;LIU, JIANG;KONG, YAN;REN, YONGYONG;BOGUNOVIC, HRVOJE;ZHANG, XIULAN;XU, YANWU;ZHANG, YICHI;LI, NUHUI;YANG, CHUNMAN;LUO, HUANG;LI, XINGYI;DENG, FEIYAN;SUN, YI;ZHO…	ABRÀMOFF MD, 2018, NPJ DIGIT MED, V1, DOI 10.1038/S41746-018-0040-6;ANG M, 2018, PROG RETIN EYE RES, V66, P132, DOI 10.1016/J.PRETEYERES.2018.04.002;ANONYMOUS, 2018, COMPUTER VISION PATT;ASAOKA R, 2016, OPHTHALMOLOGY, V123, P1974, DOI 10.1016/J.OPHTHA.2016.05.029;BI WL, 2019, CA-CANCER J CLIN, V69, P127, DOI 10.3322/CAAC.21552;CHANSANGPETCH S, 2018, AM J OPHTHALMOL, V188, PXVI, DOI 10.1016/J.AJO.…	ANGLE CLOSURE GLAUCOMA (ACG) IS A MORE AGGRESSIVE DISEASE THAN OPEN-ANGLE GLAUCOMA, WHERE THE ABNORMAL ANATOMICAL STRUCTURES OF THE ANTERIOR CHAMBER ANGLE (ACA) MAY CAUSE AN ELEVATED INTRAOCULAR PRESSURE AND GRADUALLY LEAD TO GLAUCOMATOUS OPTIC NEUROPATHY AND EVENTUALLY TO VISUAL IMPAIRMENT AND BLINDNESS. ANTERIOR SEGMENT OPTICAL COHERENCE TOMOGRAPHY (AS-OCT) IMAGING PROVIDES A FAST AND CONTACTLE…	101798				SUN YAT SEN UNIV, ZHONGSHAN OPHTHALM CTR, STATE KEY LAB OPHTHALMOL, GUANGZHOU 510060, PEOPLES R CHINA.; INCEPT INST ARTIFICIAL INTELLIGENCE, ABU DHABI, U ARAB EMIRATES.; INTELLIGENT HEALTHCARE UNIT, BEIJING, PEOPLES R CHINA.; SOUTH CHINA UNIV TECHNOL, SCH COMP SCI & ENGN, GUANGZHOU, GUANGDONG, PEOPLES R CHINA.; CONSEJO NACL INVEST CIENT & TECN, NATL SCI & TECH RES COUNCIL, BUENOS AIRES, DF, ARGEN…	SUN YAT SEN UNIVERSITY; SOUTH CHINA UNIVERSITY OF TECHNOLOGY; CONSEJO NACIONAL DE INVESTIGACIONES CIENTIFICAS Y TECNICAS (CONICET); HANGZHOU DIANZI UNIVERSITY; SOUTH CHINA UNIVERSITY OF TECHNOLOGY; SHENZHEN UNIVERSITY; SHENZHEN UNIVERSITY; CHINESE UNIVERSITY OF HONG KONG; SOOCHOW UNIVERSITY - CHINA; NINGBO UNIVERSITY; CHINESE ACADEMY OF SCIENCES; SOUTHERN UNIVERSITY OF SCIENCE & TECHNOLOGY; SHANG…	ICHALLENGE-PACG STUDY GRP				2024-02-18	AS-OCT; ANTERIOR CHAMBER ANGLE; ANGLE CLOSURE CLASSIFICATION; SCLERAL SPUR LOCALIZATION	10.1016/j.media.2020.101798	ARTICLE			1361-8423	ZHANGXL2@MAIL.SYSU.EDU.CN; YWXU@IEEE.ORG					OC9YR	DIABETIC-RETINOPATHY; CHAMBER; CLASSIFICATION; VALIDATION; DISEASES; NETWORK; IMAGES; SYSTEM		MED IMAGE ANAL	MED. IMAGE ANAL.	ENGLISH	60	GREEN SUBMITTED	LI, JIONGCHENG/0000-0002-0582-0505; FU, HUAZHU/0000-0002-9702-5524; KONG, YAN/0000-0001-7156-9905; SUN, XU/0000-0001-9155-0427; ORLANDO, JOSÉ IGNACIO/0000-0001-9734-5571; LIU, JIANG JIMMY/0000-0001-6281-6505; ZHANG, XIULAN/0000-0002-9288-0767; BIAN, CHENG/0000-0003-3498-8283	RADARWEG 29, 1043 NX AMSTERDAM, NETHERLANDS	DEC	12	AMSTERDAM	32896781	J	ELSEVIER	2020	LI, XIAOMENG/AAV-6878-2020; WANG, WEI/JBS-7400-2023; LI, YUEYUE/IVH-9846-2023; WANG, MENG/ITR-8699-2023; LI, YUE/GRS-8071-2022; LI, FEI/ABB-7789-2021; LI, YUE/IXD-9935-2023; LI, YUE/HZL-3265-2023; LI, YUE/HSF-7296-2023; LI, JIONGCHENG/GYU-7006-2022; ZHOU, WEI/JQJ-0490-2023; FU, HUAZHU/A-1411-2014; KONG, YAN/AFP-5791-2022; SUN, XU/JPL-8900-2023; ORLANDO, JOSÉ IGNACIO/AAB-3411-2020; LIU, JIANG JIMM…	ZHANG, XL (CORRESPONDING AUTHOR), SUN YAT SEN UNIV, ZHONGSHAN OPHTHALM CTR, STATE KEY LAB OPHTHALMOL, GUANGZHOU 510060, PEOPLES R CHINA.; XU, YW (CORRESPONDING AUTHOR), INTELLIGENT HEALTHCARE UNIT, BEIJING, PEOPLES R CHINA.	COMPUTER SCIENCE; ENGINEERING; RADIOLOGY, NUCLEAR MEDICINE & MEDICAL IMAGING			1361-8415	MEDICAL IMAGE ANALYSIS
LAN J;SUN DP;ALABDULRASOOL K;YUSUF HE;ZHANG L	LAN, JIE;SUN, DAPENG;ALABDULRASOOL, KHATOON;YUSUF, HASSAN EBRAHIM;ZHANG, LU	BASKARAN M, 2015, OPHTHALMOLOGY, V122, P2380, DOI 10.1016/J.OPHTHA.2015.07.030;BHARGAVA SK, 1973, ARCH OPHTHALMOL-CHIC, V89, P369, DOI 10.1001/ARCHOPHT.1973.01000040371003;JIANG YZ, 2014, OPHTHALMOLOGY, V121, P1699, DOI 10.1016/J.OPHTHA.2014.03.039;KASAI K, 2015, GRAEF ARCH CLIN EXP, V253, P1751, DOI 10.1007/S00417-015-3135-7;KUNIMATSU S, 2005, OPHTHALMOLOGY, V112, P407, DOI 10.1016/J.OPHTHA.2004…	BACKGROUND: THE AIM OF THIS WORK WAS TO EVALUATE THE NARROW ANTERIOR CHAMBER ANGLE (ACA) IN CHINESE PATIENTS BY ANTERIOR SEGMENT OPTICAL COHERENCE TOMOGRAPHY (AS-OCT). METHODS: EIGHTY RIGHT EYES OF 80 CONSECUTIVE PATIENTS WITH A SHALLOW PERIPHERAL ANTERIOR CHAMBER BUT NO PERIPHERAL ANTERIOR SYNECHIA WERE ENROLLED IN THIS STUDY. THE ACA WAS OBSERVED BY NONCONNPRESSION GONIOSCOPY AND CLASSIFIED ACC…				87	QINGDAO UNIV, COLL MED, QINGDAO, PEOPLES R CHINA.; SHANDONG ACAD MED SCI, SHANDONG EYE INST, QINGDAO EYE HOSP, 5 YANERDAO RD, QINGDAO 266071, PEOPLES R CHINA.; SALMANIYA MED COMPLEX, MANAMA, BAHRAIN.;	QINGDAO UNIVERSITY; SHANDONG FIRST MEDICAL UNIVERSITY & SHANDONG ACADEMY OF MEDICAL SCIENCES; UNIVERSITY OF JINAN					2024-02-18	IRIDOTRABECULAR CONTACT; ANTERIOR CHAMBER ANGLE; ANTERIOR SEGMENT OPTICAL COHERENCE TOMOGRAPHY; GONIOSCOPY	10.1159/000448523	ARTICLE			1423-0259	JIELAN370@163.COM	91		KEY LABORATORY PROGRAM OF SHANDONG EYE INSTITUTE [2014-1]; MEDICAL SCIENCE AND TECHNOLOGY DEVELOPMENT PROGRAM OF SHANDONG PROVINCE [2015W50204]	THIS STUDY WAS SUPPORTED BY THE KEY LABORATORY PROGRAM OF SHANDONG EYE INSTITUTE (2014-1) AND MEDICAL SCIENCE AND TECHNOLOGY DEVELOPMENT PROGRAM OF SHANDONG PROVINCE (2015W50204). THE AUTHORS THANK MS. PING LIN FOR HER LINGUISTIC AND EDITORIAL ASSISTANCE.	EK2BY	CLOSURE SUSPECTS; GLAUCOMA; EYES; BIOMICROSCOPY; PARAMETERS	2	OPHTHALMIC RES	OPHTHALMIC RES.	ENGLISH	19			ALLSCHWILERSTRASSE 10, CH-4009 BASEL, SWITZERLAND		5	BASEL	27627620	J	KARGER	2017		LAN, J (CORRESPONDING AUTHOR), SHANDONG ACAD MED SCI, SHANDONG EYE INST, QINGDAO EYE HOSP, 5 YANERDAO RD, QINGDAO 266071, PEOPLES R CHINA.	OPHTHALMOLOGY			0030-3747	OPHTHALMIC RESEARCH
BARBERÁ MI;FERNÁNDEZ LM;RIVERO PT;DE LIAÑO RG;TEUS MA	IBARZ BARBERA, MARTA;MORALES FERNANDEZ, LAURA;TANA RIVERO, PEDRO;GOMEZ DE LIANO, ROSARIO;TEUS, MIGUEL A.	ACOSTA AC, 2006, ARCH OPHTHALMOL-CHIC, V124, P1742, DOI 10.1001/ARCHOPHT.124.12.1742;ARRIETA EA, 2011, OPHTHAL SURG LAS IM, V42, P338, DOI 10.3928/15428877-20110603-01;AZUARA-BLANCO A, 1998, SURV OPHTHALMOL, V43, P93, DOI 10.1016/S0039-6257(98)00025-3;BRUBAKER RF, 1991, INVEST OPHTH VIS SCI, V32, P3145;CAIRNS JE, 1968, AM J OPHTHALMOL, V66, P673, DOI 10.1016/0002-9394(68)91288-9;CANTOR LB, 2003, …	PURPOSE TO ANALYSE THE MORPHOLOGICAL EVOLUTION OF FILTERING BLEBS WITH ANTERIOR-SEGMENT OCT (AS-OCT) AND ITS CORRELATION WITH INTRAOCULAR PRESSURE AFTER AB EXTERNO SIBS MICROSHUNT IMPLANTATION WITH MITOMYCIN C (MMC) DURING A 3-MONTH FOLLOW-UP PERIOD. METHODS TWENTY-EIGHT FILTERING BLEBS OF 28 PATIENTS WITH OPEN-ANGLE GLAUCOMA WERE MEASURED HORIZONTALLY AND VERTICALLY IN THE SUB-TENON SPACE WITH A…				E192	GRP OFTALVIST, MADRID, SPAIN.; HOSP MONCLOA, HLA HOSP, MADRID, SPAIN.; HOSP CLIN MADRID, MADRID, SPAIN.; HOSP QUIRON POZUELO, MADRID, SPAIN.; GRP OFTALVIST, ALICANTE, SPAIN.; CLIN NOVOVIS, MADRID, SPAIN.; HOSP UNIV PRINCIPE ASTURIAS, MADRID, SPAIN.; UNIV ALCALA, MADRID, SPAIN.;	PRINCE OF ASTURIAS UNIVERSITY HOSPITAL; UNIVERSIDAD DE ALCALA					2024-02-18	GLAUCOMA; POAG; PRESERFLO; AS&#8208; OCT; MIGS; BLEB; IOP; MITOMYCIN C	10.1111/aos.14863	ARTICLE; EARLY ACCESS	APR 2021		1755-3768	MARTA@MARTAIBARZ.COM	E203				YD6LB	AQUEOUS-HUMOR; GLAUCOMA; TRABECULECTOMY; SURGERY; SYSTEM; FLOW	1	ACTA OPHTHALMOL	ACTA OPHTHALMOL.	ENGLISH	32	BRONZE	BARBERÁ, MARTA IBARZ/0000-0002-7776-504X;	111 RIVER ST, HOBOKEN 07030-5774, NJ USA	2022 FEB	12	HOBOKEN	33838021	J	WILEY	2022	BARBERÁ, MARTA IBARZ/AAS-7643-2021; IBARZ BARBERA, MARTA/HKW-5068-2023	BARBERÁ, MI (CORRESPONDING AUTHOR), AVE ISAAC ALBENIZ 4E, MADRID 28224, SPAIN.	OPHTHALMOLOGY			1755-375X	ACTA OPHTHALMOLOGICA
GROSS JB;DAVIS GH;BELL NP;FELDMAN RM;BLIEDEN LS	GROSS, JACOB B.;DAVIS, GARVIN H.;BELL, NICHOLAS P.;FELDMAN, ROBERT M.;BLIEDEN, LAUREN S.	CERUTI P, 2009, BRIT J OPHTHALMOL, V93, P414, DOI 10.1136/BJO.2008.146266;GUPTA S, 2016, J GLAUCOMA, V25, PE284, DOI 10.1097/IJG.0000000000000334;HELBIG H, 1996, OPHTHALMIC SURG LAS, V27, P188;HOERAUF H, 1999, J CATARACT REFR SURG, V25, P1299, DOI 10.1016/S0886-3350(99)00160-1;IOANNIDIS AS, 2014, BRIT J OPHTHALMOL, V98, P544, DOI 10.1136/BJOPHTHALMOL-2013-303559;IOANNIDIS AS, 2010, CURR OPIN OPHT…	PURPOSE: TO DESCRIBE A NEW SURGICAL TECHNIQUE TO EFFECTIVELY CLOSE LARGE (>180 DEGREES) CYCLODIALYSIS CLEFTS. METHODS: OUR METHOD INVOLVES THE USE OF PROCEDURES COMMONLY ASSOCIATED WITH REPAIR OF RETINAL DETACHMENT AND COMPLEX CATARACT EXTRACTION: PHACOEMULSIFICATION WITH PLACEMENT OF A CAPSULAR TENSION RING FOLLOWED BY PARS PLANA VITRECTOMY AND GAS TAMPONADE WITH LIGHT CRYOTHERAPY. WE ALSO USED …				382	UNIV TEXAS HLTH SCI CTR HOUSTON UTHLTH, MCGOVERN MED SCH, RUIZ DEPT OPHTHALMOL & VISUAL SCI, HOUSTON, TX USA.; ROBERT CIZIK EYE CLIN, HOUSTON, TX USA.;	UNIVERSITY OF TEXAS SYSTEM; UNIVERSITY OF TEXAS HEALTH SCIENCE CENTER HOUSTON					2024-02-18	ANTERIOR SEGMENT OPTICAL COHERENCE TOMOGRAPHY; CYCLODIALYSIS CLEFT; REPAIR; SURGERY	10.5301/ejo.5000868	ARTICLE			1724-6016	LBLIEDEN@CIZIKEYE.ORG	385		NATIONAL EYE INSTITUTE, A CHALLENGE GRANT FROM RESEARCH TO PREVENT BLINDNESS [P30EY010608]; HERMANN EYE FUND	SUPPORTED IN PART BY NATIONAL EYE INSTITUTE VISION CORE GRANT P30EY010608, A CHALLENGE GRANT FROM RESEARCH TO PREVENT BLINDNESS TO THE MCGOVERN MEDICAL SCHOOL AT UTHEALTH, AND THE HERMANN EYE FUND.	EV8RI	GAS TAMPONADE; VITRECTOMY; CRYOTHERAPY; MANAGEMENT	3	EUR J OPHTHALMOL	EUR. J. OPHTHALMOL.	ENGLISH	7		FELDMAN, ROBERT/0000-0001-8586-6345	72/74 VIA FRIULI, 20135 MILAN, ITALY	MAY-JUN	4	MILAN	27646330	J	WICHTIG PUBLISHING	2017		BLIEDEN, LS (CORRESPONDING AUTHOR), 6400 FANNIN ST,SUITE 1800, HOUSTON, TX 77030 USA.	OPHTHALMOLOGY			1120-6721	EUROPEAN JOURNAL OF OPHTHALMOLOGY
RAJ A;BAHADUR H	RAJ, ANURADHA;BAHADUR, HARSH	ADDICKS EM, 1983, ARCH OPHTHALMOL-CHIC, V101, P795;BAIKSTIENE DP, 2016, J MODELING OPHTHALMO, V2, P10;CAIRNS JE, 1968, AM J OPHTHALMOL, V66, P673, DOI 10.1016/0002-9394(68)91288-9;CANTOR LB, 2003, J GLAUCOMA, V12, P266, DOI 10.1097/00061198-200306000-00015;FAKHRAIE G, 2011, IRAN J OPHTHALMOL, V23, P21;FEA AM, 2017, J OPHTHALMOL, V2017, DOI 10.1155/2017/9364910;KAWAJI T, 2014, JSM OPHTHALMOL, V2, …	PURPOSE THE AIM OF THE STUDY WAS TO ANALYZE MORPHOLOGICAL PARAMETERS OF APPARENTLY FUNCTIONAL FILTERING BLEBS WITH ANTERIOR SEGMENT OPTICAL COHERENCE TOMOGRAPHY AT 1 MONTH POST TRABECULECTOMY AND TO CORRELATE THESE PARAMETERS WITH INTRAOCULAR PRESSURE AT 6 MONTHS OF FOLLOW-UP TO PREDICT THE SHORT-TERM SUCCESS OF TRABECULECTOMY. METHODS IN THIS CROSS-SECTIONAL, DESCRIPTIVE STUDY, APPARENTLY FUNCTI…	1120672120924340			1978	SWAMI RAMA HIMALAYAN UNIV, HIMALAYAN INST MED SCI, DEPT OPHTHALMOL, DEHRA DUN 248140, UTTARAKHAND, INDIA.;						2024-02-18	GLAUCOMA INCISIONAL SURGERY; GLAUCOMA MEDICAL THERAPIES; DIAGNOSTIC TECHNIQUES; OCULAR BLOOD FLOW; OPEN ANGLE GLAUCOMA; POSTOPERATIVE GLAUCOMA; HYPOTONY	10.1177/1120672120924340	ARTICLE; EARLY ACCESS	MAY 2020		1724-6016	DRANURADHA_SAGAR@YAHOO.COM	1985				UB5GU	APPEARANCE	4	EUR J OPHTHALMOL	EUR. J. OPHTHALMOL.	ENGLISH	19		RAJ, ANURADHA/0000-0002-1142-0540	1 OLIVERS YARD, 55 CITY ROAD, LONDON EC1Y 1SP, ENGLAND	2021 JUL	8	LONDON	32423253	J	SAGE PUBLICATIONS LTD	2021	RAJ, ANURADHA/AAQ-3121-2020	RAJ, A (CORRESPONDING AUTHOR), SWAMI RAMA HIMALAYAN UNIV, HIMALAYAN INST MED SCI, DEPT OPHTHALMOL, DEHRA DUN 248140, UTTARAKHAND, INDIA.	OPHTHALMOLOGY			1120-6721	EUROPEAN JOURNAL OF OPHTHALMOLOGY
MOON SW;KIM J;LEE J	MOON, SANG WOO;KIM, JINMI;LEE, JIWOONG	AMAR N, 2008, OPHTHALMOLOGY, V115, P1154, DOI 10.1016/J.OPHTHA.2007.10.024;ASAM J. S., 2019, HIGH RESOLUTION IMAGING IN MICROSCOPY AND OPHTHALMOLOGY, P285, DOI DOI 10.1007/978-3-030-16638-0, DOI 10.1007/978-3-030-16638-0_13, 10.1007/978-3-030-16638-0_13;BROADWAY DC, 2001, J GLAUCOMA, V10, P237, DOI 10.1097/00061198-200106000-00017;CAIRNS JE, 1968, AM J OPHTHALMOL, V66, P673, DOI 10.1016/0002-9394…	INTRODUCTION: THE PURPOSE OF THIS STUDY WAS TO COMPARE THE CHARACTERISTICS OF FILTERING BLEB WITH ANTERIOR SEGMENT OPTICAL COHERENCE TOMOGRAPHY (AS-OCT) ACCORDING TO AMNIOTIC MEMBRANE TRANSPLANTATION (AMT). METHODS: ONE HUNDRED AND SIXTEEN EYES OF 103 GLAUCOMA PATIENTS WHO UNDERWENT TRABECULECTOMY WITH (AMT GROUP; 85 EYES) OR WITHOUT AMT (CONTROL GROUP; 31 EYES) WERE INCLUDED. INTRABLEB PARAMETER…					PUSAN NATL UNIV, DEPT OPHTHALMOL, COLL MED, BUSAN, SOUTH KOREA.; PUSAN NATL UNIV HOSP, BIOMED RES INST, BUSAN, SOUTH KOREA.; PUSAN NATL UNIV HOSP, BIOMED RES INST, CLIN TRIAL CTR, DEPT BIOSTAT, BUSAN, SOUTH KOREA.; PUSAN NATL UNIV, COLL MED, DEPT OPHTHALMOL, 179 GUDEOK RO, BUSAN 49241, SOUTH KOREA.;	PUSAN NATIONAL UNIVERSITY; PUSAN NATIONAL UNIVERSITY; PUSAN NATIONAL UNIVERSITY HOSPITAL; PUSAN NATIONAL UNIVERSITY; PUSAN NATIONAL UNIVERSITY HOSPITAL; PUSAN NATIONAL UNIVERSITY					2024-02-18	TRABECULECTOMY; AMNIOTIC MEMBRANE TRANSPLANTATION; BLEB; ANTERIOR SEGMENT OPTICAL COHERENCE TOMOGRAPHY; PRIMARY OPEN-ANGLE GLAUCOMA	10.1159/000531036	ARTICLE; EARLY ACCESS	JUN 2023		1423-0259	GLAUCOMA@PNU.AC.KR			MEDICAL BIG DATA AND AI-BASED EARLY DETECTION OF VISUAL DYSFUNCTION -BUSAN; PATIENT-CENTERED CLINICAL RESEARCH COORDINATING CENTER - MINISTRY OF HEALTH AND WELFARE, REPUBLIC OF KOREA [HI19C0481, HC19C0276]	THIS RESEARCH WAS SUPPORTED BY A GRANT FROM MEDICAL BIG DATA AND AI-BASED EARLY DETECTION OF VISUAL DYSFUNCTION FUNDED BY BUSAN AND MANAGED BY BUSAN TECHNO PARK AND BY THE PATIENT-CENTERED CLINICAL RESEARCH COORDINATING CENTER, FUNDED BY THE MINISTRY OF HEALTH AND WELFARE, REPUBLIC OF KOREA (GRANT NO. HI19C0481, HC19C0276). THE FUNDING AGENCIES HAVE PLAYED NO ROLE IN THIS RESEARCH.	K1WY6	VIVO CONFOCAL MICROSCOPY; FILTERING BLEBS; MITOMYCIN-C; INTRAOCULAR-PRESSURE; RISK-FACTORS; GLAUCOMA; OUTCOMES; CLASSIFICATION; FAILURE; PATHWAY		OPHTHALMIC RES	OPHTHALMIC RES.	ENGLISH	52	GREEN PUBLISHED, GOLD	MOON, SANG WOO/0000-0003-0313-3928	ALLSCHWILERSTRASSE 10, CH-4009 BASEL, SWITZERLAND	2023 JUN 16	21	BASEL	37331353	J	KARGER	2023	LEE, JIWOONG/AAA-5837-2022	LEE, J (CORRESPONDING AUTHOR), PUSAN NATL UNIV, COLL MED, DEPT OPHTHALMOL, 179 GUDEOK RO, BUSAN 49241, SOUTH KOREA.	OPHTHALMOLOGY			0030-3747	OPHTHALMIC RESEARCH
XU BY;PARDESHI AA;BURKEMPER B;RICHTER GM;LIN SC;MCKEAN-COWDIN R;VARMA R	XU, BENJAMIN Y.;PARDESHI, ANMOL A.;BURKEMPER, BRUCE;RICHTER, GRACE M.;LIN, SHAN C.;MCKEAN-COWDIN, ROBERTA;VARMA, ROHIT	AKIL H, 2017, BMC OPHTHALMOL, V17, DOI 10.1186/S12886-017-0425-3;BASKARAN M, 2012, J GLAUCOMA, V21, P493, DOI 10.1097/IJG.0B013E3182183362;BELL NP, 2013, ISRN OPHTHALMOL, V2013;BLIEDEN LS, 2015, INVEST OPHTH VIS SCI, V56, P2842, DOI 10.1167/IOVS.14-15883;FOSTER PJ, 2002, BRIT J OPHTHALMOL, V86, P238, DOI 10.1136/BJO.86.2.238;HE MG, 2006, INVEST OPHTH VIS SCI, V47, P4772, DOI 10.1167/IOVS.06-0309;…	PURPOSE: TO QUANTIFY INTERQUADRANT DIFFERENCES IN ANTERIOR CHAMBER ANGLE (ACA) CONFIGURATION ASSESSED ON GONIOSCOPY, EYECAM, AND ANTERIOR SEGMENT OPTICAL COHERENCE TOMOGRAPHY (AS-OCT) IN A COHORT OF CHINESE AMERICANS. METHODS: SUBJECTS AGED 50 YEARS OR OLDER WERE RECRUITED FROM THE CHINESE AMERICAN EYE STUDY (CHES), A POPULATION-BASED EPIDEMIOLOGIC STUDY IN LOS ANGELES, CA. EACH SUBJECT UNDERWENT…	5				UNIV SOUTHERN CALIF, KECK SCH MED, DEPT OPHTHALMOL, USC ROSKI EYE INST, LOS ANGELES, CA 90033 USA.; CHA HOLLYWOOD PRESBYTERIAN MED CTR, SOUTHERN CALIF EYECARE & VIS RES INST, LOS ANGELES, CA USA.; UNIV CALIF SAN FRANCISCO, DEPT OPHTHALMOL, BECKMAN VIS CTR, SAN FRANCISCO, CA 94143 USA.; UNIV SOUTHERN CALIF, KECK SCH MED, DEPT PREVENT MED, LOS ANGELES, CA 90033 USA.;	UNIVERSITY OF SOUTHERN CALIFORNIA; UNIVERSITY OF CALIFORNIA SYSTEM; UNIVERSITY OF CALIFORNIA SAN FRANCISCO; UNIVERSITY OF SOUTHERN CALIFORNIA					2024-02-18	ANGLE CLOSURE; GONIOSCOPY; ANTERIOR SEGMENT OCT; OCULAR ANATOMY; ANTERIOR CHAMBER ANGLE	10.1167/tvst.8.2.5	ARTICLE				BENJAMIN.XU@MED.USC.EDU			NATIONAL EYE INSTITUTE, NATIONAL INSTITUTE OF HEALTH, BETHESDA, MARYLAND [U10 EY017337]; NATIONAL EYE INSTITUTE, NATIONAL EYE INSTITUTE OF HEALTH, BETHESDA, MARYLAND [K23 EY029763]; RESEARCH TO PREVENT BLINDNESS, NEW YORK, NY	SUPPORTED BY GRANT U10 EY017337 FROM THE NATIONAL EYE INSTITUTE, NATIONAL INSTITUTE OF HEALTH, BETHESDA, MARYLAND, GRANT K23 EY029763 FROM THE NATIONAL EYE INSTITUTE, NATIONAL EYE INSTITUTE OF HEALTH, BETHESDA, MARYLAND, AND AN UNRESTRICTED GRANT FROM RESEARCH TO PREVENT BLINDNESS, NEW YORK, NY; ROHIT VARMA IS A RESEARCH TO PREVENT BLINDNESS SYBIL B. HARRINGTON SCHOLAR.	HS6SU	OPTICAL COHERENCE TOMOGRAPHY; IRIS VOLUME; REPRODUCIBILITY; AGREEMENT; CLOSURE; IMAGES; PARAMETER; NUMBER	2	TRANSL VIS SCI TECHN	TRANSL. VIS. SCI. TECHNOL.	ENGLISH	24	GOLD, GREEN PUBLISHED		12300 TWINBROOK PARKWAY, ROCKVILLE, MD 20852-1606 USA	MAR	9	ROCKVILLE	30941263	J	ASSOC RESEARCH VISION OPHTHALMOLOGY INC	2019		XU, BY (CORRESPONDING AUTHOR), UNIV SOUTHERN CALIF, KECK SCH MED, DEPT OPHTHALMOL, 1450 SAN PABLO ST,4TH FLOOR,SUITE 4700, LOS ANGELES, CA 90033 USA.	OPHTHALMOLOGY			2164-2591	TRANSLATIONAL VISION SCIENCE & TECHNOLOGY
ARAKI T;SHIMAZAWA M;NAKAMURA S;OTSU W;NUMATA Y;SAKATA M;KABAYAMA K;TSUSAKI H;HARA H	ARAKI, TOMOAKI;SHIMAZAWA, MASAMITSU;NAKAMURA, SHINSUKE;OTSU, WATARU;NUMATA, YOSUKE;SAKATA, MEGUMI;KABAYAMA, KOJI;TSUSAKI, HIDESHI;HARA, HIDEAKI	ALMAZAN A, 2013, VET OPHTHALMOL, V16, P163, DOI 10.1111/J.1463-5224.2012.01030.X;AMYOT M, 1979, CAN J OPHTHALMOL, V14, P208;ARGUS WA, 1995, OPHTHALMOLOGY, V102, P1810, DOI 10.1016/S0161-6420(95)30790-7;ESPORCATTE BLB, 2016, ARQ BRAS OFTALMOL, V79, P270;CALUGARA D, 2022, INT J OPHTHALMOL-CHI, V15, P1005, DOI 10.18240/IJO.2022.06.20;CAMP DA, 2019, CURR OPIN OPHTHALMOL, V30, P71, DOI 10.1097/ICU.000…	MANY GLAUCOMA TREATMENTS FOCUS ON LOWERING INTRAOCULAR PRESSURE (IOP), WITH NOVEL DRUGS CONTINUING TO BE DEVELOPED. ONE WIDELY USED MODEL INVOLVES RAISING IOP BY APPLYING A LASER TO THE TRABECULAR IRIS ANGLE (TIA) OF CYNOMOLGUS MONKEYS TO DAMAGE THE TRABECULAR MESHWORK. THIS MODEL, HOWEVER, PRESENTS CHALLENGES SUCH AS VARYING IOP VALUES, POTENTIAL TRABECULAR MESHWORK DAMAGE, AND RISK OF ANIMAL DI…				52	SHIN NIPPON BIOMED LABS LTD, DRUG SAFETY RES LABS SNBL DSR, KAGOSHIMA, JAPAN.; GIFU PHARMACEUT UNIV, DEPT BIOFUNCT EVALUAT, MOL PHARMACOL, GIFU, JAPAN.; GIFU PHARMACEUT UNIV, BIOMED RES, GIFU, JAPAN.;	SHIN NIPPON BIOMEDICAL LABORATORIES LTD.; GIFU PHARMACEUTICAL UNIVERSITY; GIFU PHARMACEUTICAL UNIVERSITY					2024-02-18	INTRAOCULAR PRESSURE; NON-HUMAN PRIMATE; GLAUCOMA; TRABECULAR IRIS ANGLE; ANTERIOR SEGMENT OPTICAL COHERENCE; TOMOGRAPHY	10.1016/j.jphs.2023.12.004	ARTICLE	DEC 2023		1347-8648	SHIMAZAWA@GIFU-PU.AC.JP	60		SHIN NIPPON BIOMEDICAL LABORATORIES LTD. (SNBL)	THIS WORK WAS SUPPORTED BY SHIN NIPPON BIOMEDICAL LABORATORIES LTD. (SNBL) .	FD3I1	NORMAL-TENSION GLAUCOMA; NERVE-FIBER LAYER; TRABECULAR MESHWORK; OCULAR HYPERTENSION; KETAMINE; LASER; THICKNESS	2	J PHARMACOL SCI	J. PHARMACOL. SCI.	ENGLISH	50	GOLD	OTSU, WATARU/0000-0002-5930-1954	EDITORIAL OFF, KANTOHYA BLDG GOKOMACHI-EBISUGAWA NAKAGYO-KU, KYOTO, 604, JAPAN	FEB	9	KYOTO	38246728	J	JAPANESE PHARMACOLOGICAL SOC	2024		SHIMAZAWA, M (CORRESPONDING AUTHOR), GIFU PHARMACEUT UNIV, DEPT BIOFUNCT EVALUAT, MOL PHARMACOL, GIFU, JAPAN.	PHARMACOLOGY & PHARMACY			1347-8613	JOURNAL OF PHARMACOLOGICAL SCIENCES
ZHOU RZ;CHUANG AZ;FELDMAN RM;GIANCARDO L	ZHOU, RUNZHI;CHUANG, ALICE Z.;FELDMAN, ROBERT M.;GIANCARDO, LUCA	CHOLLET F, 2017, PROC CVPR IEEE, P1800, DOI 10.1109/CVPR.2017.195;CROWELL EL, 2020, J GLAUCOMA, V29, P1036, DOI 10.1097/IJG.0000000000001664;DOSOVITSKIY A, 2021, ARXIV, DOI ARXIV:2010.11929, DOI 10.48550/ARXIV.2010.11929;FU HZ, 2020, MED IMAGE ANAL, V66, DOI 10.1016/J.MEDIA.2020.101798;FU HZ, 2019, AM J OPHTHALMOL, V203, P37, DOI 10.1016/J.AJO.2019.02.028;GEDDE SJ, 2021, OPHTHALMOLOGY, V128, PP30…	OBJECTIVE: CORRECT DIAGNOSIS OF PRIMARY ANGLE-CLOSURE DISEASE (PACD) AND CLASSIFICATION OF PLATEAU IRIS CONFIGURATION (PIC) EXISTENCE IS ESSENTIAL FOR APPROPRIATE GLAUCOMA TREATMENT. A FAST NON-CONTACT METHOD THAT CAN AUTOMATICALLY DETECT PACD AND PIC WOULD BE VALUABLE FOR IMPROVING TREATMENT DECISIONS AND REDUCING THE MISDIAGNOSIS RATE. METHODS: IN THIS WORK, WE PROPOSE AN AUTOMATED METHOD TO AN…	104778				UNIV TEXAS HLTH SCI CTR HOUSTON, CTR PRECIS HLTH, SCH BIOMED INFORMAT, HOUSTON, TX 77030 USA.; UNIV TEXAS HLTH SCI CTR HOUSTON, MCGOVERN MED SCH, RUIZ DEPT OPHTHALMOL & VISUAL SCI, HOUSTON, TX USA.; UNIV TEXAS HLTH SCI CTR HOUSTON, DEPT BIOSTAT & DATA SCI, HOUSTON, TX USA.;	UNIVERSITY OF TEXAS SYSTEM; UNIVERSITY OF TEXAS HEALTH SCIENCE CENTER HOUSTON; UNIVERSITY OF TEXAS SYSTEM; UNIVERSITY OF TEXAS HEALTH SCIENCE CENTER HOUSTON; UNIVERSITY OF TEXAS SYSTEM; UNIVERSITY OF TEXAS HEALTH SCIENCE CENTER HOUSTON					2024-02-18	ANTERIOR CHAMBER ANGLE CLASSIFICATION; PLATEAU IRIS; GLAUCOMA; AS-OCT; DEEP LEARNING; MULTI -VIEW	10.1016/j.bspc.2023.104778	ARTICLE; EARLY ACCESS	MAR 2023		1746-8108	LUCA.GIANCARDO@UTH.TMC.EDU			TRANSLATIONAL RESEARCH INSTITUTE FOR SPACE HEALTH THROUGH NASA [NNX16AO69A]; NIH [UL1TR003167, R01NS121154]; CANCER PREVENTION AND RESEARCH INSTITUTE OF TEXAS GRANT [RP 170668]; NIH/NEI VISION CORE GRANTS [P30EY028102]	THIS WORK IS SUPPORTED BY THE TRANSLATIONAL RESEARCH INSTITUTE FOR SPACE HEALTH THROUGH NASA COOPERATIVE AGREEMENT NNX16AO69A. LG IS ALSO SUPPORTED IN PART BY NIH GRANTS UL1TR003167 AND R01NS121154, AND A CANCER PREVENTION AND RESEARCH INSTITUTE OF TEXAS GRANT (RP 170668) . AZC AND RMF ARE PARTIALLY SUPPORTED BY NIH/NEI VISION CORE GRANTS P30EY028102.	A7XA6	PARAMETERS		BIOMED SIGNAL PROCES	BIOMED. SIGNAL PROCESS. CONTROL	ENGLISH	29			THE BOULEVARD, LANGFORD LANE, KIDLINGTON, OXFORD OX5 1GB, OXON, ENGLAND	2023 AUG	8	OXFORD		J	ELSEVIER SCI LTD	2023		GIANCARDO, L (CORRESPONDING AUTHOR), UNIV TEXAS HLTH SCI CTR HOUSTON, CTR PRECIS HLTH, SCH BIOMED INFORMAT, HOUSTON, TX 77030 USA.	ENGINEERING			1746-8094	BIOMEDICAL SIGNAL PROCESSING AND CONTROL
WEN JC;STINNETT SS;ASRANI S	WEN, JOANNE C.;STINNETT, SANDRA S.;ASRANI, SANJAY	CAIRNS JE, 1968, AM J OPHTHALMOL, V66, P673, DOI 10.1016/0002-9394(68)91288-9;CANTOR LB, 2003, J GLAUCOMA, V12, P266, DOI 10.1097/00061198-200306000-00015;FAKHRAIE G, 2011, IRAN J OPHTHALMOL, V23, P21;FUKUDA S, 2014, INVEST OPHTH VIS SCI, V55, P5200, DOI 10.1167/IOVS.14-14474;FURRER S, 2012, BMC OPHTHALMOL, V12, DOI 10.1186/1471-2415-12-24;HAMANAKA T, 2013, INVEST OPHTH VIS SCI, V54, P6536, DOI 1…	PURPOSE: TO COMPARE A NOVEL ANTERIOR SEGMENT OPTICAL COHERENCE TOMOGRAPHY (AS-OCT) BLEB GRADING SYSTEM WITH A CLINICAL BLEB GRADING SYSTEM AND BOTH WITH INTRAOCULAR PRESSURE (IOP) FOLLOWING TRABECULECTOMY SURGERY. MATERIALS AND METHODS: A NOVEL AS-OCT GRADING SYSTEM BASED ON BLEB SIZE AND INTERNAL REFLECTIVITY WAS DEVELOPED. AN IMAGING CENTER WAS TASKED WITH MASKED GRADING OF AS-OCT IMAGES ACQUIR…				403	UNIV WASHINGTON, DEPT OPHTHALMOL, SEATTLE, WA 98195 USA.; DUKE UNIV, CTR EYE, DEPT OPHTHALMOL, DURHAM, NC 27710 USA.;	UNIVERSITY OF WASHINGTON; UNIVERSITY OF WASHINGTON SEATTLE; DUKE UNIVERSITY					2024-02-18	ANTERIOR SEGMENT OPTICAL COHERENCE TOMOGRAPHY; BLEB; GLAUCOMA; IMAGING; MOORFIELDS BLEB GRADING SYSTEM; TRABECULECTOMY	10.1097/IJG.0000000000000636	ARTICLE			1536-481X	SANJAY.ASRANI@DUKE.EDU	408				ET7JY	FILTERING BLEBS; CLASSIFICATION SCORE; GLAUCOMA SURGERY; MITOMYCIN-C; MORPHOLOGY; SCALE	5	J GLAUCOMA	J. GLAUCOMA	ENGLISH	29		STINNETT, SANDRA/0000-0001-7192-0195	TWO COMMERCE SQ, 2001 MARKET ST, PHILADELPHIA, PA 19103 USA	MAY	6	PHILADELPHIA	28221330	J	LIPPINCOTT WILLIAMS & WILKINS	2017		ASRANI, S (CORRESPONDING AUTHOR), DUKE EYE CTR, 2351 ERWIN RD DUMC 3802, DURHAM, NC 27710 USA.	OPHTHALMOLOGY			1057-0829	JOURNAL OF GLAUCOMA
SIHOTA R;VASHISHT P;SHARMA A;CHAKRABORTY S;GUPTA V;PANDEY RM	SIHOTA, RAMANJIT;VASHISHT, PRAVEEN;SHARMA, AJAY;CHAKRABORTY, SWAPNA;GUPTA, VINEY;PANDEY, RAVINDRA M.	CONSOLE JW, 2008, BR J OPHTHALMOL, V92, P1575;DANDONA L, 2000, OPHTHALMOLOGY, V107, P1710, DOI 10.1016/S0161-6420(00)00274-8;GARUDADRI CS, 2002, J GLAUCOMA, V11, P502, DOI 10.1097/00061198-200212000-00009;HE MG, 2006, INVEST OPHTH VIS SCI, V47, P4772, DOI 10.1167/IOVS.06-0309;KUMAR RS, 2008, OPHTHALMOLOGY, V115, P430, DOI 10.1016/J.OPHTHA.2007.07.026;KUMAR RS, 2009, ARCH OPHTHALMOL-CHIC, V127, P1…	PURPOSE: TO QUANTIFY THE ANGLE CHARACTERISTICS IN AN INDIAN POPULATION, AND DETERMINE THE PREVALENCE OF EYES AT RISK OF ANGLE CLOSURE. MATERIALS AND METHODS: THIS POPULATION-BASED COHORT STUDY WAS CARRIED OUT TO EVALUATE INDIVIDUALS, 40 TO 59 YEARS OF AGE, CLINICALLY. THE INDIVIDUALS UNDERWENT ANTERIOR SEGMENT OPTICAL COHERENCE TOMOGRAPHY OF THEIR RIGHT EYES IN THE HORIZONTAL MERIDIAN, USING THE …				180	ALL INDIA INST MED SCI, DR RAJENDRA PRASAD CTR OPHTHALM SCI, GLAUCOMA RES FACIL, NEW DELHI 110029, INDIA.; ALL INDIA INST MED SCI, DEPT BIOSTAT, NEW DELHI 110029, INDIA.; ALL INDIA INST MED SCI, DR RAJENDRA PRASAD CTR OPHTHALM SCI, CLIN SERV, NEW DELHI 110029, INDIA.;	ALL INDIA INSTITUTE OF MEDICAL SCIENCES (AIIMS) NEW DELHI; DR. RAJENDRA PRASAD CENTRE FOR OPHTHALMIC SCIENCES; ALL INDIA INSTITUTE OF MEDICAL SCIENCES (AIIMS) NEW DELHI; ALL INDIA INSTITUTE OF MEDICAL SCIENCES (AIIMS) NEW DELHI; DR. RAJENDRA PRASAD CENTRE FOR OPHTHALMIC SCIENCES					2024-02-18	ANTERIOR SEGMENT OCT; POPULATION; ANGLE PARAMETERS	10.1097/IJG.0b013e3182070cb1	ARTICLE				RJSIHOTA@HOTMAIL.COM	185				900PM	PRIMARY ANGLE-CLOSURE; RURAL-POPULATION; SOUTHERN INDIA; CHAMBER ANGLE; GLAUCOMA; EYE; PREVALENCE; GONIOSCOPY; DISEASE; IRIS	3	J GLAUCOMA	J. GLAUCOMA	ENGLISH	16		GARG, RAKESH/0000-0001-5842-8024; GUPTA, VINEY/0000-0002-8850-0485	530 WALNUT ST, PHILADELPHIA, PA 19106-3621 USA	MAR	6	PHILADELPHIA	21430553	J	LIPPINCOTT WILLIAMS & WILKINS	2012	GARG, RAKESH/H-4591-2011	SIHOTA, R (CORRESPONDING AUTHOR), ALL INDIA INST MED SCI, DR RAJENDRA PRASAD CTR OPHTHALM SCI, GLAUCOMA RES FACIL, NEW DELHI 110029, INDIA.	OPHTHALMOLOGY			1057-0829	JOURNAL OF GLAUCOMA
LI DJ;WANG NL;WANG BS;WANG T;JONAS JB	LI, DEJIAO;WANG, NINGLI;WANG, BINGSONG;WANG, TAO;JONAS, JOST B.	BARKANA Y, 2007, ARCH OPHTHALMOL-CHIC, V125, P1331, DOI 10.1001/ARCHOPHT.125.10.1331;CONGDON N, 1995, AM J CLIN NUTR, V61, P1076, DOI 10.1093/AJCN/61.5.1076;CONGDON NG, 2000, AM J CLIN NUTR, V72, P1004;GLOSTER J, 1973, BRIT J OPHTHALMOL, V57, P170, DOI 10.1136/BJO.57.3.170;GORIN G, 1965, AM J OPHTHALMOL, V58, P235;HANLEY JA, 1988, MED DECIS MAKING, V8, P197, DOI 10.1177/0272989X8800800308;HANLEY …	PURPOSE: TO EXAMINE THE DIAGNOSTIC VALUE OF A MODIFIED DARK ROOM PROVOCATIVE TEST (DRPT) IN DETECTING PRIMARY CLOSURE OF THE ANTERIOR CHAMBER ANGLE. METHODS: THE CROSS-SECTIONAL OBSERVATIONAL PROSPECTIVE CLINICAL STUDY INCLUDED SUSPECTS OF PRIMARY ANGLE CLOSURE. USING ANTERIOR SEGMENT OPTICAL COHERENCE TOMOGRAPHY (AS-OCT), WE MEASURED THE ANTERIOR CHAMBER ANGLE CONFIGURATION AT ROOM LIGHT AND AFT…				155	CAPITAL UNIV MED SCI, TONGREN EYE CTR, BEIJING TONGREN HOSP, BEIJING 100730, PEOPLES R CHINA.; CAPITAL UNIV MED SCI, BEIJING INST OPHTHALMOL, BEIJING TONGREN HOSP, BEIJING 100730, PEOPLES R CHINA.; CAPITAL UNIV MED SCI, DEPT OPHTHALMOL, CHINA JAPAN FRIENDSHIP HOSP, BEIJING 100730, PEOPLES R CHINA.;	CAPITAL MEDICAL UNIVERSITY; CAPITAL MEDICAL UNIVERSITY; CAPITAL MEDICAL UNIVERSITY; CHINA-JAPAN FRIENDSHIP HOSPITAL					2024-02-18	DARK ROOM PROVOCATIVE TEST; PRIMARY ANGLE-CLOSURE GLAUCOMA; PRIMARY ANGLE CLOSURE; ANTERIOR SEGMENT OPTICAL COHERENCE TOMOGRAPHY	10.1097/IJG.0b013e31820bd215	ARTICLE				MEINIANG1973@SINA.COM	159		MINISTRY OF SCIENCE AND TECHNOLOGY OF THE PEOPLE'S REPUBLIC OF CHINA [2007BAI18B08]	SUPPORTED BY THE NATIONAL 11TH FIVE-YEAR PLAN SCIENCE AND TECHNOLOGY SUPPORTING PROGRAMS, THE MINISTRY OF SCIENCE AND TECHNOLOGY OF THE PEOPLE'S REPUBLIC OF CHINA (GRANT NO. 2007BAI18B08).	900PM	OPTICAL COHERENCE TOMOGRAPHY; VITAMIN-A STATUS; ANTERIOR-CHAMBER; ULTRASOUND BIOMICROSCOPY; GLAUCOMA; POPULATION; GONIOSCOPY; RESPONSIVENESS; THRESHOLD; PUPILLARY	3	J GLAUCOMA	J. GLAUCOMA	ENGLISH	30			530 WALNUT ST, PHILADELPHIA, PA 19106-3621 USA	MAR	5	PHILADELPHIA	21336147	J	LIPPINCOTT WILLIAMS & WILKINS	2012		WANG, NL (CORRESPONDING AUTHOR), CAPITAL UNIV MED SCI, TONGREN EYE CTR, BEIJING TONGREN HOSP, 2 CHONGNEI ST, BEIJING 100730, PEOPLES R CHINA.	OPHTHALMOLOGY			1057-0829	JOURNAL OF GLAUCOMA
FAKHRAIE G;KOHANSAL S;ESLAMI Y;JABBARVAND M;ZAREI R;RAFIZADEH SM;RAJABI MB;FALLAH MR;MOGHIMI S	FAKHRAIE, GHASEM;KOHANSAL, SEDIGHEH;ESLAMI, YADOLLAH;JABBARVAND, MAHMOUD;ZAREI, REZA;RAFIZADEH, SEYED MOHSEN;RAJABI, MOHAMMAD BAGHER;FALLAH, MOHAMMAD REZA;MOGHIMI, SASAN	ADDICKS EM, 1983, ARCH OPHTHALMOL-CHIC, V101, P795;CAIRNS JE, 1968, AM J OPHTHALMOL, V66, P673, DOI 10.1016/0002-9394(68)91288-9;CANTOR LB, 2003, J GLAUCOMA, V12, P266, DOI 10.1097/00061198-200306000-00015;CIANCAGLINI M, 2008, J GLAUCOMA, V17, P308, DOI 10.1097/IJG.0B013E31815C3A19;JANCEVSKI M, 2010, SEMIN OPHTHALMOL, V25, P317, DOI 10.3109/08820538.2010.518473;LEUNG CKS, 2007, BRIT J OPHTHALMOL,…	PURPOSE: TO EVALUATE USEFULNESS OF ANTERIOR SEGMENT OPTICAL COHERENCE TOMOGRAPHY (AS-OCT) IN EVALUATION OF FILTERING BLEB FUNCTIONALITY AND TO CORRELATE ITS FINDINGS WITH CLINICAL BLEB EXAMINATION METHODS: IN THIS CROSS-SECTIONAL, DESCRIPTIVE STUDY 55 EYES WITH APPARENTLY FUNCTIONAL BLEB WERE EVALUATED. FOLLOWING A COMPREHENSIVE OPHTHALMIC EXAMINATION, FILTERING BLEB GRADING WAS PERFORMED BASED O…				21	UNIV TEHRAN MED SCI, FARABI EYE HOSP, EYE RES CTR, TEHRAN, IRAN.;	TEHRAN UNIVERSITY OF MEDICAL SCIENCES					2024-02-18	ANTERIOR SEGMENT OPTICAL COHERENCE TOMOGRAPHY; FILTERING BLEB; GLAUCOMA		ARTICLE				SASANIMII@YAHOO.COM	28		TEHRAN UNIVERSITY OF MEDICAL SCIENCE (TUMS)	NONE OF THE AUTHORS HAS ANY PROPRIETARY OR FINANCIAL INTEREST IN THE PRODUCTS MENTIONED IN THIS ARTICLE. THIS STUDY WAS SUPPORTED BY A GRANT FROM THE TEHRAN UNIVERSITY OF MEDICAL SCIENCE (TUMS).	869DY	APPEARANCE GRADING SCALE; TRABECULECTOMY BLEBS; SURGERY	4	IRAN J OPHTHALMOL	IRAN. J. OPHTHALMOL.	ENGLISH	16		RAJABI, MOHAMMAD BAGHER/0000-0002-2796-0162; RAFIZADEH, SEYED MOHSEN/0000-0002-5480-590X; FALLAH, MOHAMMAD/0000-0003-1759-7387	NORTH KARGAR AVE, 2ND FLR, NO 4, HOMA ALLEY, TEHRAN, 1418654743, IRAN		8	TEHRAN		J	IRANIAN SOC OPHTHALMOLOGY	2011	ZAREI, REZA/GRF-6080-2022; RAJABI, MOHAMMAD BAGHER/AAD-7442-2022; MOHAMMADI-FALLAH, MOHAMMADREZA/L-6493-2017; RAFIZADEH, SEYED MOHSEN/ABA-4812-2020; FALLAH, MOHAMMAD/U-6877-2017	MOGHIMI, S (CORRESPONDING AUTHOR), UNIV TEHRAN MED SCI, FARABI EYE HOSP, EYE RES CTR, TEHRAN, IRAN.	OPHTHALMOLOGY			1735-4153	IRANIAN JOURNAL OF OPHTHALMOLOGY
SHON K;SUNG KR;KWAK J;SHIN JW;LEE JY	SHON, KILHWAN;SUNG, KYUNG RIM;KWAK, JIEHOON;SHIN, JOONG WON;LEE, JOO YEON	ABDI H, 2010, WIRES COMPUT STAT, V2, P433, DOI 10.1002/WICS.101;BAEK S, 2013, INVEST OPHTH VIS SCI, V54, P848, DOI 10.1167/IOVS.12-10391;CIRESAN D.C., 2011, PROCEEDINGS OF THE 22ND INTERNATIONAL JOINT CONFERENCE ON ARTIFICIAL INTELLIGENCE-VOLUME VOLUME TWO, VVOLUME 22, P1237, DOI 10.5591/978-1-57735-516-8/IJCAI11-210;FU HZ, 2019, AM J OPHTHALMOL, V203, P37, DOI 10.1016/J.AJO.2019.02.028;GONG SX, …	PURPOSE: TO INVESTIGATE THE FEASIBILITY OF EXTRACTING A LOW-DIMENSIONAL LATENT STRUCTURE OF ANTERIOR SEGMENT OPTICAL COHERENCE TOMOGRAPHY (AS-OCT) IMAGES BY USE OF A /3METHODS: WE RETROSPECTIVELY COLLECTED 2111 AS-OCT IMAGES FROM 2111 EYES OF 1261 PARTICIPANTS FROM THE ONGOING ASAN GLAUCOMA PROGRESSION STUDY. AFTER HYPERPARAMETER OPTIMIZATION, THE IMAGES WERE ANALYZED WITH /3-VAE. RESULTS: THE ME…					GANGNEUNG ASAN HOSP, DEPT OPHTHALMOL, KANGNUNG, SOUTH KOREA.; ASAN ARTIFICIAL INTELLIGENCE INST, HWASEONG SI, GYEONGGI DO, SOUTH KOREA.; UNIV ULSAN, COLL MED, ASAN MED CTR, DEPT OPHTHALMOL, 388-1 PUNGNAP 2 DONG, SEOUL 138736, SOUTH KOREA.; CAMP 9 ORTHOPED CLIN, HWASEONG SI, GYEONGGI DO, SOUTH KOREA.;	UNIVERSITY OF ULSAN; ASAN MEDICAL CENTER					2024-02-18	ANTERIOR SEGMENT OCT; DEEP LEARNING; ARTIFICIAL INTELLIGENCE; 3-VARIATIONAL AUTOENCODER	10.1167/tvst.11.2.11	ARTICLE				SUNGEYE@GMAIL.COM					ZP3ZX	ANGLE-CLOSURE	2	TRANSL VIS SCI TECHN	TRANSL. VIS. SCI. TECHNOL.	ENGLISH	28	GOLD, GREEN PUBLISHED		12300 TWINBROOK PARKWAY, ROCKVILLE, MD 20852-1606 USA	FEB	10	ROCKVILLE	35133405	J	ASSOC RESEARCH VISION OPHTHALMOLOGY INC	2022		SUNG, KR (CORRESPONDING AUTHOR), UNIV ULSAN, COLL MED, ASAN MED CTR, DEPT OPHTHALMOL, 388-1 PUNGNAP 2 DONG, SEOUL 138736, SOUTH KOREA.	OPHTHALMOLOGY			2164-2591	TRANSLATIONAL VISION SCIENCE & TECHNOLOGY
SAVASTANO A;CARLÀ MM;GAMBINI G;GIANNUZZI F;BOSELLI F;RIZZO S	SAVASTANO, ALFONSO;CARLA, MATTEO MARIO;GAMBINI, GLORIA;GIANNUZZI, FEDERICO;BOSELLI, FRANCESCO;RIZZO, STANISLAO	AL-JAZZAF AM, 2005, J GLAUCOMA, V14, P40, DOI 10.1097/01.IJG.0000145811.62095.FA;CHATZARA A, 2019, SEMIN OPHTHALMOL, V34, P93, DOI 10.1080/08820538.2019.1581820;CHAUDHARY A, 2018, EXPERT REV MED DEVIC, V15, P47, DOI 10.1080/17434440.2018.1419060;DE GREGORIO A, 2018, INT OPHTHALMOL, V38, P1129, DOI 10.1007/S10792-017-0571-X;FEA AM, 2020, CLIN OPHTHALMOL, V14, P1805, DOI 10.2147/OPTH.S178348;FEA AM…	BACKGROUND TO DISCUSS THE EFFICACY OF AN INFERIOR IMPLANT OF XEN 63 GEL STENT IN A PATIENT WITH REFRACTORY GLAUCOMA AFTER TRABECULECTOMY FAILURE AND VITREORETINAL SURGERY WITH SILICONE OIL TAMPONADE. CASE DESCRIPTION WE REPORT THE CASE OF A 73-YEAR-OLD MAN WITH A HISTORY OF REFRACTORY OPEN GLAUCOMA WITH TRABECULECTOMY FAILURE. HE EXPERIENCED RECURRENT RETINAL DETACHMENTS WITH SILICONE OIL TAMPONA…				NP27	FDN POLICLIN UNIV A GEMELLI IRCCS, OPHTHALMOL UNIT, ROME, ITALY.; UNIV CATTOLICA SACRO CUORE, OPHTHALMOL UNIT, ROME, ITALY.; FDN POLICLIN UNIV A GEMELLI IRCCS, OPHTHALMOL UNIT, ROME, ITALY.; UNIV CATTOLICA SACRO CUORE, LARGO A GEMELLI 8, ROME, ITALY.;	CATHOLIC UNIVERSITY OF THE SACRED HEART; IRCCS POLICLINICO GEMELLI; CATHOLIC UNIVERSITY OF THE SACRED HEART; IRCCS POLICLINICO GEMELLI; CATHOLIC UNIVERSITY OF THE SACRED HEART; IRCCS POLICLINICO GEMELLI; CATHOLIC UNIVERSITY OF THE SACRED HEART; IRCCS POLICLINICO GEMELLI					2024-02-18	XEN 63 GEL STENT; SILICONE OIL TAMPONADE; REFRACTORY GLAUCOMA; ANTERIOR SEGMENT OPTICAL COHERENCE TOMOGRAPHY	10.1177/11206721231172231	ARTICLE; EARLY ACCESS	MAY 2023		1724-6016		NP31				FB4A0	VITREORETINAL SURGERY; INSERTION; OUTCOMES; SAFETY	1	EUR J OPHTHALMOL	EUR. J. OPHTHALMOL.	ENGLISH	24		CARLA, MATTEO MARIO/0000-0003-2979-1638	1 OLIVERS YARD, 55 CITY ROAD, LONDON EC1Y 1SP, ENGLAND	2024 JAN	5	LONDON	37192674	J	SAGE PUBLICATIONS LTD	2024		CARLÀ, MM (CORRESPONDING AUTHOR), FDN POLICLIN UNIV A GEMELLI IRCCS, OPHTHALMOL UNIT, ROME, ITALY.; CARLÀ, MM (CORRESPONDING AUTHOR), UNIV CATTOLICA SACRO CUORE, LARGO A GEMELLI 8, ROME, ITALY.	OPHTHALMOLOGY			1120-6721	EUROPEAN JOURNAL OF OPHTHALMOLOGY
JUNG KI;LIM SA;PARK HYL;PARK CK	JUNG, KYOUNG IN;LIM, SUNG A.;PARK, HAE-YOUNG L.;PARK, CHAN KEE	BLAND JM, 1986, LANCET, V1, P307, DOI 10.1016/S0140-6736(86)90837-8;CANTOR LB, 2003, J GLAUCOMA, V12, P266, DOI 10.1097/00061198-200306000-00015;FELDMAN RM, 1997, J GLAUCOMA, V6, P10;GEDDE SJ, 2009, AM J OPHTHALMOL, V148, P670, DOI 10.1016/J.AJO.2009.06.018;HILL RA, 2000, AM J OPHTHALMOL, V129, P608, DOI 10.1016/S0002-9394(99)00465-1;JOSHI AB, 2005, J GLAUCOMA, V14, P172, DOI 10.1097/01.IJG.00001…	OBJECTIVE: THE CURRENT STUDY INVESTIGATED THE INTERNAL STRUCTURE OF BLEBS USING ANTERIOR-SEGMENT OPTICAL COHERENCE TOMOGRAPHY (AS-OCT) IN PATIENTS WHO HAD UNDERGONE AHMED GLAUCOMA VALVE (AGV) (NEW WORLD MEDICAL INC, RANCHO CUCAMONGA, CA) IMPLANTATION AND COMPARED THE DIFFERENCES BETWEEN SUCCESSFUL AND FAILED SURGERIES. DESIGN: CROSS-SECTIONAL, OBSERVATIONAL STUDY. PARTICIPANTS: A TOTAL OF 76 PATI…				978	CATHOLIC UNIV KOREA, SEOUL ST MARYS HOSP, COLL MED, DEPT OPHTHALMOL & VISUAL SCI, SEOUL 137701, SOUTH KOREA.;	SEOUL ST. MARY'S HOSPITAL; CATHOLIC UNIVERSITY OF KOREA					2024-02-18		10.1016/j.ophtha.2012.10.015	ARTICLE				CKPARK@CATHOLIC.AC.KR	983				140VE	FILTERING BLEBS; TRABECULECTOMY	5	OPHTHALMOLOGY	OPHTHALMOLOGY	ENGLISH	16			360 PARK AVE SOUTH, NEW YORK, NY 10010-1710 USA	MAY	6	NEW YORK	23347982	J	ELSEVIER SCIENCE INC	2013		PARK, CK (CORRESPONDING AUTHOR), CATHOLIC UNIV KOREA, SEOUL ST MARYS HOSP, COLL MED, DEPT OPHTHALMOL & VISUAL SCI, 505 BANPO DONG, SEOUL 137701, SOUTH KOREA.	OPHTHALMOLOGY			0161-6420	OPHTHALMOLOGY
DAWCZYNSKI J;KOENIGSDOERFFER E;AUGSTEN R;STROBEL J	DAWCZYNSKI, J.;KOENIGSDOERFFER, E.;AUGSTEN, R.;STROBEL, J.	BAIKOFF G, 2005, J CATARACT REFR SURG, V31, P1722, DOI 10.1016/J.JCRS.2005.02.030;BAIKOFF G, 2004, J CATARACT REFR SURG, V30, P1843, DOI 10.1016/J.JCRS.2004.05.024;BLECKMANN H, 2006, OPHTHALMOLOGE, V103, P199, DOI 10.1007/S00347-005-1255-X;GOLDSMITH JA, 2005, OPHTHALMOLOGY, V112, P238, DOI 10.1016/J.OPHTHA.2004.09.019;HAYASHI K, 2000, OPHTHALMOLOGY, V107, P698, DOI 10.1016/S0161-6420(00)00007-5;J…	PURPOSE. TO EXAMINE ANTERIOR CHAMBER DEPTH (ACD) AND ANTERIOR CHAMBER ANGLE (ACA) IN PATIENTS WITH GLAUCOMA AFTER CATARACT EXTRACTION WITH AN ANTERIOR OPTICAL COHERENCE TOMOGRAPHY (OCT) SYSTEM. METHODS. A NEW COMMERCIALLY AVAILABLE 1310 NM INFRARED LIGHT ANTERIOR SEGMENT OCT SYSTEM WAS USED FOR ANTERIOR CHAMBER EVALUATION. SIXTY PATIENTS (N=20 WITH PRIMARY OPEN ANGLE GLAUCOMA [POAG], N=20 WITH AN…				363	UNIV HOSP, DEPT OPHTHALMOL, D-07743 JENA, GERMANY.;	FRIEDRICH SCHILLER UNIVERSITY OF JENA					2024-02-18	ANTERIOR SEGMENT OCT; ANTERIOR CHAMBER ANGLE; ANTERIOR CHAMBER DEPTH; CATARACT; GLAUCOMA	10.1177/112067210701700314	ARTICLE			1724-6016	JENS.DAWCZYNSKI@MED.UNI-JENA.DE	367				190IE	CLOSURE; GONIOMETRY; WIDTH	3	EUR J OPHTHALMOL	EUR. J. OPHTHALMOL.	ENGLISH	16			1 OLIVERS YARD, 55 CITY ROAD, LONDON EC1Y 1SP, ENGLAND	MAY-JUN	5	LONDON	17534817	J	SAGE PUBLICATIONS LTD	2007		DAWCZYNSKI, J (CORRESPONDING AUTHOR), UNIV HOSP, DEPT OPHTHALMOL, BACHSTR 18, D-07743 JENA, GERMANY.	OPHTHALMOLOGY			1120-6721	EUROPEAN JOURNAL OF OPHTHALMOLOGY
NARITA A;MORIZANE Y;MIYAKE T;SUGIHARA K;ISHIKAWA T;SEGUCHI J;SHIRAGA F	NARITA, AKIKO;MORIZANE, YUKI;MIYAKE, TOMOE;SUGIHARA, KAE;ISHIKAWA, TOMOKO;SEGUCHI, JIRO;SHIRAGA, FUMIO	AWAI-KASAOKA N, 2012, J CATARACT REFR SURG, V38, P419, DOI 10.1016/J.JCRS.2011.09.035;BLACKWELL B, 2001, ARCH OPHTHALMOL-CHIC, V119, P1771;CHEN PP, 1998, OPHTHALMOLOGY, V105, P1928, DOI 10.1016/S0161-6420(98)91044-2;DADA TANUJ, 2013, J CURR GLAUCOMA PRACT, V7, P99, DOI 10.5005/JP-JOURNALS-10008-1145;FRIEDMAN DS, 2002, OPHTHALMOLOGY, V109, P1902, DOI 10.1016/S0161-6420(02)01267-8;HUSAIN R, 2012, A…	PRECIS: ANALYSIS OF FILTERING BLEB MORPHOLOGY USING SWEPT-SOURCE 3-DIMENSIONAL ANTERIOR SEGMENT OPTICAL COHERENCE TOMOGRAPHY (3D AS-OCT) INDICATES THAT PHACOEMULSIFICATION CAN NEGATIVELY IMPACT THE MORPHOLOGY OF PREEXISTING FILTERING BLEBS. PURPOSE: TO IDENTIFY THE CROSS-SECTIONAL MORPHOLOGIC CHANGES IN SUCCESSFUL FILTERING BLEBS AFTER PHACOEMULSIFICATION USING SWEPT-SOURCE 3D AS-OCT. MATERIALS A…				433	OKAYAMA SAISEIKAI GEN HOSP, DEPT OPHTHALMOL, OKAYAMA, JAPAN.; OKAYAMA UNIV, DEPT OPHTHALMOL, GRAD SCH MED DENT & PHARMACEUT SCI, OKAYAMA, JAPAN.;	OKAYAMA UNIVERSITY					2024-02-18	FILTERING BLEB; CATARACT; PHACOEMULSIFICATION; SWEPT-SOURCE ANTERIOR SEGMENT OPTICAL COHERENCE TOMOGRAPHY; TRABECULECTOMY	10.1097/IJG.0000000000001204	ARTICLE			1536-481X	AKIKO.N@ORANGE.MEGAEGG.NE.JP	439				HX9PJ	INTRAOCULAR-PRESSURE; TRABECULECTOMY; PHACOEMULSIFICATION; GLAUCOMA; EYES	5	J GLAUCOMA	J. GLAUCOMA	ENGLISH	23			TWO COMMERCE SQ, 2001 MARKET ST, PHILADELPHIA, PA 19103 USA	MAY	7	PHILADELPHIA	30720573	J	LIPPINCOTT WILLIAMS & WILKINS	2019		NARITA, A (CORRESPONDING AUTHOR), OKAYAMA SAISEIKAI GEN HOSP, DEPT OPHTHALMOL, KITA KU, 2-25 KOKUTAI CHO, OKAYAMA 7008511, JAPAN.	OPHTHALMOLOGY			1057-0829	JOURNAL OF GLAUCOMA
HWANG HS;PARK CW;JOO CK	HWANG, HO SIK;PARK, CHANG WON;JOO, CHOUN-KI	ARITA R, 2008, OPHTHALMOLOGY, V115, P911, DOI 10.1016/J.OPHTHA.2007.06.031;ARITA R, 2009, OPHTHALMOLOGY, V116, P379, DOI 10.1016/J.OPHTHA.2008.10.012;BIZHEVA K, 2010, J BIOMED OPT, V15, DOI 10.1117/1.3475957;KRACHMER J., 2005, CORNEA, V1;ROBIN JB, 1985, OPHTHALMOLOGY, V92, P1423;TOMLINSON A, 2011, INVEST OPHTH VIS SCI, V52, P2006, DOI 10.1167/IOVS.10-6997F	PURPOSE: TO PRESENT A NOVEL NONCONTACT MEIBOGRAPHY SYSTEM WITH ANTERIOR SEGMENT OPTICAL COHERENCE TOMOGRAPHY (OCT), WHICH IS WIDELY USED IN CLINICS FOR THE ANTERIOR SEGMENT (CORNEA, ANTERIOR CHAMBER ANGLE, ETC.), AND COMPARE THE RESULTS WITH PREEXISTING INFRARED MEIBOGRAPHY. METHODS: THIS RESEARCH WAS CARRIED OUT AT THE SEOUL ST MARY'S HOSPITAL WITH 2 VOLUNTEERS. PREEXISTING INFRARED MEIBOGRAPHY …				40	SEOUL ST MARYS HOSP, DEPT OPHTHALMOL, SEOUL 137040, SOUTH KOREA.; CATHOLIC UNIV KOREA, COLL MED, DEPT OPHTHALMOL & VISUAL SCI, SEOUL, SOUTH KOREA.;	SEOUL ST. MARY'S HOSPITAL; CATHOLIC UNIVERSITY OF KOREA					2024-02-18	INFRARED; MEIBOGRAPHY; MEIBOMIAN GLAND; OPTICAL COHERENCE TOMOGRAPHY	10.1097/ICO.0b013e318247b2fd	ARTICLE				CKJOO@CATHOLIC.AC.KR	43				049TY	MEIBOMIAN GLAND DYSFUNCTION	1	CORNEA	CORNEA	ENGLISH	6			530 WALNUT ST, PHILADELPHIA, PA 19106-3621 USA	JAN	4	PHILADELPHIA	22677640	J	LIPPINCOTT WILLIAMS & WILKINS	2013		JOO, CK (CORRESPONDING AUTHOR), SEOUL ST MARYS HOSP, DEPT OPHTHALMOL, 505 BANPO DONG, SEOUL 137040, SOUTH KOREA.	OPHTHALMOLOGY			0277-3740	CORNEA
DANGDA S;RADELL JE;MAVROMMATIS MA;LEE R;DO A;SIDOTI PA;PANARELLI JF	DANGDA, SONAL;RADELL, JAKE E.;MAVROMMATIS, MARIA A.;LEE, RACHEL;DO, ANNA;SIDOTI, PAUL A.;PANARELLI, JOSEPH F.	DE GREGORIO A, 2018, INT OPHTHALMOL, V38, P1129, DOI 10.1007/S10792-017-0571-X;FEA AM, 2017, J OPHTHALMOL, V2017, DOI 10.1155/2017/9364910;GALAL A, 2017, J OPHTHALMOL, V2017, DOI 10.1155/2017/5457246;GATER R, 2019, INVEST OPHTH VIS SCI, V60, P605, DOI 10.1167/IOVS.18-25335;GEDDE SJ, 2012, AM J OPHTHALMOL, V153, P789, DOI 10.1016/J.AJO.2011.10.026;GROVER DS, 2017, AM J OPHTHALMOL, V183, P25, DOI 1…	PRECIS: SUB-TENON'S IMPLANTATION OF THE XEN GEL STENT RESULTED IN SIGNIFICANT INTRAOCULAR PRESSURE (IOP) LOWERING ALONG WITH A LOW RATE OF POSTOPERATIVE BLEB NEEDLING, AND A FAVORABLE BLEB MORPHOLOGY ON ANTERIOR SEGMENT OPTICAL COHERENCE TOMOGRAPHY (AS-OCT). PURPOSE: THE AIM WAS TO ASSESS CLINICAL OUTCOMES AND BLEB MORPHOLOGY FOLLOWING SUB-TENON'S IMPLANTATION OF THE XEN GEL STENT. METHODS: THE M…				988	NEW YORK EYE & EAR INFIRM MT SINAI, DEPT OPHTHALMOL, NEW YORK, NY USA.; ICAHN SCH MED MT SINAI, DEPT OPHTHALMOL, NEW YORK, NY USA.; NYU, LANGONE HLTH, DEPT OPHTHALMOL, 222 EAST 41ST ST, NEW YORK, NY 10017 USA.;	NEW YORK EYE & EAR INFIRMARY OF MOUNT SINAI; ICAHN SCHOOL OF MEDICINE AT MOUNT SINAI; NEW YORK UNIVERSITY					2024-02-18	MIGS; BLEB MORPHOLOGY; SUB-TENON'S MICROSHUNT IMPLANTATION; OPEN CONJUNCTIVAL APPROACH FOR MICROSHUNT IMPLANTATION; ANTERIOR SEGMENT OCT IMAGING	10.1097/IJG.0000000000001929	ARTICLE			1536-481X	JOSEPH.PANARELLI@NYULANGONEHEALTH.ORG	995				ZB1LV	FILTERING BLEBS; GLAUCOMA; IMPLANT; SAFETY; EFFICACY; OUTCOMES; SURGERY	11	J GLAUCOMA	J. GLAUCOMA	ENGLISH	29		LEE, RACHEL S.K./0000-0002-8358-8182	TWO COMMERCE SQ, 2001 MARKET ST, PHILADELPHIA, PA 19103 USA	NOV	8	PHILADELPHIA	34402463	J	LIPPINCOTT WILLIAMS & WILKINS	2021	LEE, RACHEL S.K./HNI-5213-2023	PANARELLI, JF (CORRESPONDING AUTHOR), NYU, LANGONE HLTH, DEPT OPHTHALMOL, 222 EAST 41ST ST, NEW YORK, NY 10017 USA.	OPHTHALMOLOGY			1057-0829	JOURNAL OF GLAUCOMA
KELES A;KARAMAN SK	KELES, ALI;KARAMAN, SULEYMAN KORHAN	ANAND N, 1996, EYE, V10, P509, DOI 10.1038/EYE.1996.111;ARI S, 2012, OPHTHAL SURG LAS IM, V43, P395, DOI 10.3928/15428877-20120705-03;ARON-ROSA D, 1980, J AM INTRAOCUL IMPLANT SOC, V6, P352;AUFFARTH GU, 2004, OPHTHAL EPIDEMIOL, V11, P319, DOI 10.1080/09286580490515116;BARNES EA, 2004, OPHTHALMOLOGY, V111, P1393, DOI 10.1016/J.OPHTHA.2003.12.047;CHONG RS, 2013, INVEST OPHTH VIS SCI, V54, P1650, DO…	THIS STUDY IS TO DETERMINE WHETHER POST-PROCEDURE INTRAOCULAR PRESSURE (IOP) INCREASE IS ASSOCIATED WITH THE ANTERIOR CHAMBER ANGLE IN CASES OF NEODYMIUM: YTTRIUM-ALUMINUM GARNET (ND: YAG) LASER CAPSULOTOMY. THE STUDY INCLUDED 51 EYES WITH POSTERIOR CAPSULE OPACIFICATION. INITIAL IOP VALUES OF THE PATIENTS WERE COMPARED WITH IOP VALUES WITHOUT INTRAOCULAR PRESSURE-LOWERING ADMINISTRATION AT THE E…	13				BILECIK SEYH EDEBALI UNIV, FAC ENGN, DEPT OPHTHALMOL, TR-11230 BILECIK, TURKIYE.; UNIV HLTH SCI, ULUCANLAR EYE TRAINING & RES HOSP, DEPT OPHTHALMOL, ANKARA, TURKIYE.;	BILECIK SEYH EDEBALI UNIVERSITY; ANKARA ULUCANLAR EYE TRAINING & RESEARCH HOSPITAL; UNIVERSITY OF HEALTH SCIENCES TURKEY					2024-02-18	ANTERIOR CHAMBER ANGLE; ANTERIOR SEGMENT OPTICAL COHERENCE TOMOGRAPHY; INTRAOCULAR PRESSURE; ND:YAG LASER CAPSULOTOMY	10.1007/s10103-023-03958-0	ARTICLE			1435-604X	ALIKELES06@GMAIL.COM					DB3O7	POSTERIOR CAPSULOTOMY; CHAMBER DEPTH; NEODYMIUM; REPRODUCIBILITY; REFRACTION; ELEVATION	1	LASER MED SCI	LASERS MED. SCI.	ENGLISH	24		KELES, ALI/0000-0002-4684-9996	236 GRAYS INN RD, 6TH FLOOR, LONDON WC1X 8HL, ENGLAND	DEC 22	6	LONDON	38135858	J	SPRINGER LONDON LTD	2023		KELES, A (CORRESPONDING AUTHOR), BILECIK SEYH EDEBALI UNIV, FAC ENGN, DEPT OPHTHALMOL, TR-11230 BILECIK, TURKIYE.	ENGINEERING; SURGERY			0268-8921	LASERS IN MEDICAL SCIENCE
MADANAGOPALAN VG;VELIS G;DEVULAPALLY S	MADANAGOPALAN, V. G.;VELIS, GIRISH;DEVULAPALLY, SANTOSH	BISWAS J, 2008, INDIAN J OPHTHALMOL, V56, DOI 10.4103/0301-4738.42425;ICHHPUJANI P, 2009, GRAEF ARCH CLIN EXP, V247, P1585, DOI 10.1007/S00417-009-1155-X;RAJ P, 2017, SEMIN OPHTHALMOL, V32, P537, DOI 10.3109/08820538.2015.1123734;SUIC SP, 2001, COLLEGIUM ANTROPOL, V25, P117;VALONE J, 1994, OPHTHALMOLOGY, V101, P1908, DOI 10.1016/S0161-6420(94)31084-0	PURPOSETO DEMONSTRATE THE PRESENCE OF EMULSIFIED SILICONE OIL (SO) DROPLETS IN THE CANAL OF SCHLEMM WITH ANTERIOR SEGMENT OPTICAL COHERENCE TOMOGRAPHY (AS-OCT).METHODSAS-OCT IMAGES FROM AN EYE THAT HAD UNDERGONE RETINAL DETACHMENT (RD) SURGERY THREE YEARS AGO WERE REVIEWED. AT THE TIME OF SURGERY, SO HAD BEEN USED AS THE TAMPONADING AGENT.RESULTSTHE AS-OCT IMAGES DEMONSTRATED THAT MINUTE EMULSIFI…				925	ARAVIND EYE HOSP, VITREORETINAL SERV, PONDICHERRY 605007, INDIA.;						2024-02-18	EMULSIFIED SILICONE OIL; ANTERIOR CHAMBER ANGLE; CANAL OF SCHLEMM; SECONDARY GLAUCOMA	10.1007/s10792-018-0877-3	ARTICLE			1573-2630	DRMADANAGOPALAN@GMAIL.COM	926				HR2NR	GLAUCOMA	4	INT OPHTHALMOL	INT. OPHTHALMOL.	ENGLISH	5		VELIS, GIRISH/0000-0003-3189-9920; MADANAGOPALAN, V G/0000-0002-9970-466X	VAN GODEWIJCKSTRAAT 30, 3311 GZ DORDRECHT, NETHERLANDS	APR	2	DORDRECHT	29500698	J	SPRINGER	2019	VELIS, GIRISH/AAL-7672-2020; MADANAGOPALAN, V G/M-5417-2019	MADANAGOPALAN, VG (CORRESPONDING AUTHOR), ARAVIND EYE HOSP, VITREORETINAL SERV, PONDICHERRY 605007, INDIA.	OPHTHALMOLOGY			0165-5701	INTERNATIONAL OPHTHALMOLOGY
YOO C;EOM YS;SUH YW;KIM YY	YOO, CHUNGKWON;EOM, YOUNG SUB;SUH, YOUNG-WOO;KIM, YONG YEON	AGHAIAN E, 2004, OPHTHALMOLOGY, V111, P2211, DOI 10.1016/J.OPHTHA.2004.06.013;BAILEY MD, 2008, INVEST OPHTH VIS SCI, V49, P4353, DOI 10.1167/IOVS.08-2008;BECHMANN M, 2001, CORNEA, V20, P50, DOI 10.1097/00003226-200101000-00010;BURGOYNE CF, 2005, PROG RETIN EYE RES, V24, P39, DOI 10.1016/J.PRETEYERES.2004.06.001;CASSON RJ, 2008, ARCH OPHTHALMOL-CHIC, V126, P981, DOI 10.1001/ARCHOPHT.126.7.981;COPT…	PURPOSE: TO ASSESS THE CORRELATION BETWEEN CENTRAL CORNEAL THICKNESS (CCT) AND ANTERIOR SCLERAL THICKNESS (AST) IN KOREAN PATIENTS WITH NORMAL TENSION GLAUCOMA (NTG) AND PRIMARY OPEN ANGLE GLAUCOMA (POAG). PATIENTS AND METHODS: CONSECUTIVE PATIENTS WITH POAG, NTG, AND NORMAL INDIVIDUALS WERE RECRUITED. ANTERIOR SEGMENT OPTICAL COHERENCE TOMOGRAPHY (AS-OCT, VISANTE) WAS USED TO MEASURE CCT AND AST…				95	KOREA UNIV, COLL MED, DEPT OPHTHALMOL, SEOUL 152703, SOUTH KOREA.;	KOREA UNIVERSITY; KOREA UNIVERSITY MEDICINE (KU MEDICINE)					2024-02-18	ANTERIOR SEGMENT OPTICAL COHERENCE TOMOGRAPHY; CENTRAL CORNEAL THICKNESS; GLAUCOMA; SCLERAL THICKNESS	10.1097/IJG.0b013e3181dde051	ARTICLE			1536-481X	YONGYKIM@MAIL.KOREA.AC.KR	99				715WP	INTRAOCULAR-PRESSURE; ULTRASOUND PACHYMETRY; OCULAR HYPERTENSION; AFRICAN-AMERICANS; TENSION GLAUCOMA; NERVE HEAD; EYE; POPULATION; CHINESE; BIOMICROSCOPY	2	J GLAUCOMA	J. GLAUCOMA	ENGLISH	30		EOM, YOUNGSUB/0000-0001-9475-4409; YOO, CHUNGKWON/0000-0003-4564-4400	TWO COMMERCE SQ, 2001 MARKET ST, PHILADELPHIA, PA 19103 USA	FEB	5	PHILADELPHIA	20577104	J	LIPPINCOTT WILLIAMS & WILKINS	2011	YOO, CHUNGKWON/AAJ-6270-2020	KIM, YY (CORRESPONDING AUTHOR), KOREA UNIV, GURO HOSP, DEPT OPHTHALMOL, 97 GURO DONG GIL, SEOUL 152703, SOUTH KOREA.	OPHTHALMOLOGY			1057-0829	JOURNAL OF GLAUCOMA
QUEK DTL;NONGPIUR ME;PERERA SA;AUNG T	QUEK, DESMOND T. L.;NONGPIUR, MONISHA E.;PERERA, SHAMIRA A.;AUNG, TIN	AHMED I, 2007, GLAUCOMA TODAY, V4, P1;ALSAGOFF Z, 2000, OPHTHALMOLOGY, V107, P2300, DOI 10.1016/S0161-6420(00)00385-7;ANG LPK, 2004, OPHTHALMOLOGY, V111, P1636, DOI 10.1016/J.OPHTHA.2004.01.032;ANONYMOUS, OCULAR SURG NEWS;AUNG T, 2005, OPHTHALMOLOGY, V112, P28, DOI 10.1016/J.OPHTHA.2004.06.033;BAEZ KA, 1992, OPHTHALMIC SURG LAS, V23, P426;BARKANA Y, 2007, ARCH OPHTHALMOL-CHIC, V125, P1331, DOI 10…	PRIMARY ANGLE CLOSURE GLAUCOMA (PACG) IS A MAJOR FORM OF GLAUCOMA IN LARGE POPULOUS COUNTRIES IN EAST AND SOUTH ASIA. THE HIGH VISUAL MORBIDITY FROM PACG IS RELATED TO THE DESTRUCTIVE NATURE OF THE ASYMPTOMATIC FORM OF THE DISEASE. EARLY DETECTION OF ANATOMICALLY NARROW ANGLES IS IMPORTANT AND THE SUBSEQUENT PREVENTION OF VISUAL LOSS FROM PACG DEPENDS ON AN ACCURATE ASSESSMENT OF THE ANTERIOR CHA…				S69	NATL UNIV SINGAPORE, SINGAPORE NATL EYE CTR, SINGAPORE 117548, SINGAPORE.; NATL UNIV SINGAPORE, SINGAPORE EYE RES INST, SINGAPORE 117548, SINGAPORE.; NATL UNIV SINGAPORE, YONG LOO LIN SCH MED, SINGAPORE 117548, SINGAPORE.;	SINGAPORE NATIONAL EYE CENTER; NATIONAL UNIVERSITY OF SINGAPORE; NATIONAL UNIVERSITY OF SINGAPORE; SINGAPORE NATIONAL EYE CENTER; NATIONAL UNIVERSITY OF SINGAPORE					2024-02-18	ANTERIOR CHAMBER ANGLE IMAGING; ANTERIOR SEGMENT OPTICAL COHERENCE TOMOGRAPHY; EYECAM; GONIOSCOPY; SCHEIMPFLUG PHOTOGRAPHY; ULTRASOUND BIOMICROSCOPY	10.4103/0301-4738.73699	ARTICLE				AUNG_TIN@YAHOO.CO.UK	S75				V29IK			INDIAN J OPHTHALMOL	INDIAN J. OPHTHALMOL.	ENGLISH	59	GREEN PUBLISHED, GOLD	PERERA, SHAMIRA/0000-0002-1404-5096	B-9, KANARA BUSINESS CENTRE, OFF LINK RD, GHAKTOPAR-E, MUMBAI, 400075, INDIA	JAN	7	MUMBAI	21150037	J	MEDKNOW PUBLICATIONS & MEDIA PVT LTD	2011	TIN, AUNG/B-6521-2009	AUNG, T (CORRESPONDING AUTHOR), NATL UNIV SINGAPORE, SINGAPORE NATL EYE CTR, SINGAPORE EYE RES INST, YONG LOO LIN SCH MED, SINGAPORE 117548, SINGAPORE.	OPHTHALMOLOGY			0301-4738	INDIAN JOURNAL OF OPHTHALMOLOGY
CHONG RS;SAKATA LM;NARAYANASWAMY AK;HO SW;HE MG;BASKARAN M;WONG TY;PERERA SA;AUNG T	CHONG, RACHEL S.;SAKATA, LISANDRO M.;NARAYANASWAMY, ARUN K.;HO, SUE-WEI;HE, MINGGUANG;BASKARAN, MANI;WONG, TIEN YIN;PERERA, SHAMIRA A.;AUNG, TIN	APTEL F, 2010, OPHTHALMOLOGY, V117, PC, DOI 10.1016/J.OPHTHA.2009.10.030;AUNG T, 2005, OPHTHALMOLOGY, V112, P28, DOI 10.1016/J.OPHTHA.2004.06.033;FOSTER PJ, 2004, BRIT J OPHTHALMOL, V88, P486, DOI 10.1136/BJO.2003.020016;FOSTER PJ, 2003, INVEST OPHTH VIS SCI, V44, P3885, DOI 10.1167/IOVS.03-0012;HAMANAKA T, 2011, INVEST OPHTH VIS SCI, V52, P8849, DOI 10.1167/IOVS.11-7591;NOLAN WP, 2007, OPHTHALMO…	PURPOSE. TO ASSESS THE RELATIONSHIP BETWEEN INTRAOCULAR PRESSURE (IOP) AND ANTERIOR CHAMBER ANGLE (ACA) CONFIGURATION AS ASSESSED BY GONIOSCOPY AND ANTERIOR SEGMENT OPTICAL COHERENCE TOMOGRAPHY (AS-OCT). METHODS. A TOTAL OF 2045 SUBJECTS AGED 50 YEARS AND OLDER, WERE RECRUITED FROM A COMMUNITY CLINIC AND UNDERWENT AS-OCT, GOLDMANN APPLANATION TONOMETRY, AND GONIOSCOPY. A QUADRANT WAS CLASSIFIED A…				1650	SINGAPORE EYE RES INST, SINGAPORE, SINGAPORE.; SINGAPORE NATL EYE CTR, SINGAPORE 168751, SINGAPORE.; UNIV FED PARANA, BR-80060000 CURITIBA, PARANA, BRAZIL.; SUN YAT SEN UNIV, STATE KEY LAB OPHTHALMOL, ZHONGSHAN OPHTHALM CTR, GUANGZHOU 510275, GUANGDONG, PEOPLES R CHINA.; NATL UNIV SINGAPORE, YONG LOO LIN SCH MED, SINGAPORE 117595, SINGAPORE.;	NATIONAL UNIVERSITY OF SINGAPORE; SINGAPORE NATIONAL EYE CENTER; SINGAPORE NATIONAL EYE CENTER; UNIVERSIDADE FEDERAL DO PARANA; SUN YAT SEN UNIVERSITY; NATIONAL UNIVERSITY OF SINGAPORE					2024-02-18		10.1167/iovs.12-9986	ARTICLE			1552-5783	AUNG_TIN@YAHOO.CO.UK	1655		BIOMEDICAL RESEARCH COUNCIL, SINGAPORE; NATIONAL MEDICAL RESEARCH COUNCIL, SINGAPORE	SUPPORTED BY GRANTS FROM THE BIOMEDICAL RESEARCH COUNCIL, SINGAPORE, AND THE NATIONAL MEDICAL RESEARCH COUNCIL, SINGAPORE.	117GV	GLAUCOMATOUS OPTIC NEUROPATHY; COHERENCE TOMOGRAPHY; CLOSURE GLAUCOMA; DRAINAGE ANGLE; CHAMBER; WIDTH; RISK	3	INVEST OPHTH VIS SCI	INVEST. OPHTHALMOL. VIS. SCI.	ENGLISH	15	BRONZE	CHONG, RACHEL/0000-0003-1339-4099; HE, MINGGUANG/0000-0002-6912-2810; WONG, TIEN YIN/0000-0002-8448-1264; PERERA, SHAMIRA/0000-0002-1404-5096	12300 TWINBROOK PARKWAY, ROCKVILLE, MD 20852-1606 USA	MAR	6	ROCKVILLE	23299476	J	ASSOC RESEARCH VISION OPHTHALMOLOGY INC	2013	CHONG, RACHEL/AAY-2015-2021; TIN, AUNG/B-6521-2009; HE, MINGGUANG/AAY-5239-2020; HE, MING/JDN-0835-2023; WONG, TIEN YIN/AAC-9724-2020; HE, MING/HZM-5794-2023; MANI, BASKARAN/GWZ-8299-2022	AUNG, T (CORRESPONDING AUTHOR), SINGAPORE NATL EYE CTR, 11 3RD HOSP AVE, SINGAPORE 168751, SINGAPORE.	OPHTHALMOLOGY			0146-0404	INVESTIGATIVE OPHTHALMOLOGY & VISUAL SCIENCE
BAEK S;SUNG KR;SUN JH;LEE JR;LEE KS;KIM CY;SHON K	BAEK, SEUNGHEE;SUNG, KYUNG RIM;SUN, JAE HONG;LEE, JONG RAK;LEE, KYOUNG SUB;KIM, CHAN YUN;SHON, KILHWAN	ALSAGOFF Z, 2000, OPHTHALMOLOGY, V107, P2300, DOI 10.1016/S0161-6420(00)00385-7;ANG LPK, 2000, OPHTHALMOLOGY, V107, P2092, DOI 10.1016/S0161-6420(00)00360-2;APTEL F, 2010, OPHTHALMOLOGY, V117, PC, DOI 10.1016/J.OPHTHA.2009.10.030;AUNG T, 2005, ARCH OPHTHALMOL-CHIC, V123, P527, DOI 10.1001/ARCHOPHT.123.4.527;AUNG T, 2001, AM J OPHTHALMOL, V131, P7, DOI 10.1016/S0002-9394(00)00621-8;CHEUNG CYL, 201…	PURPOSE. TO INVESTIGATE THE POSSIBILITY OF CLASSIFYING ANGLE CLOSURE EYES IN TERMS OF FEATURES PROVIDED BY ANTERIOR SEGMENT OPTICAL COHERENCE TOMOGRAPHY (AS OCT). METHODS. ANGLE CLOSURE (PRIMARY ANGLE CLOSURE [PAC] OR PAC GLAUCOMA [PACG]) EYES DIAGNOSED BY GONIOSCOPY WERE IMAGED USING AS OCT UNDER THE SAME LIGHTING CONDITIONS. ANTERIOR CHAMBER DEPTH (ACD), ANTERIOR CHAMBER WIDTH (ACW), IRIS CROSS…				848	UNIV ULSAN, COLL MED, ASAN MED CTR, DEPT CLIN EPIDEMIOL & BIOSTAT, SEOUL 138736, SOUTH KOREA.; UNIV ULSAN, COLL MED, ASAN MED CTR, DEPT OPHTHALMOL, SEOUL 138736, SOUTH KOREA.; YONSEI UNIV, COLL MED, INST VIS RES, DEPT OPHTHALMOL, SEOUL, SOUTH KOREA.;	UNIVERSITY OF ULSAN; ASAN MEDICAL CENTER; UNIVERSITY OF ULSAN; ASAN MEDICAL CENTER; YONSEI UNIVERSITY; YONSEI UNIVERSITY HEALTH SYSTEM					2024-02-18		10.1167/iovs.12-10391	ARTICLE			1552-5783	SUNGEYE@GMAIL.COM	853		KOREA HEALTH TECHNOLOGY R&D PROJECT, MINISTRY OF HEALTH & WELFARE, REPUBLIC OF KOREA [A101727]	SUPPORTED BY A GRANT OF THE KOREA HEALTH TECHNOLOGY R&D PROJECT, MINISTRY OF HEALTH & WELFARE, REPUBLIC OF KOREA (A101727). NONE OF THE AUTHORS HAVE ANY PROPRIETARY INTEREST OR FINANCIAL SUPPORT IN THE DEVELOPMENT OR MARKETING OF INSTRUMENTS OR EQUIPMENT MENTIONED IN THIS ARTICLE, OR ANY COMPETING INSTRUMENTS OR PIECES OF EQUIPMENT.	081QX	LASER PERIPHERAL IRIDOTOMY; INTRAOCULAR-PRESSURE; DYNAMIC-ANALYSIS; CHAMBER ANGLE; GLAUCOMA; IRIS; POPULATION; EYES; ASSOCIATION; PREVALENCE	1	INVEST OPHTH VIS SCI	INVEST. OPHTHALMOL. VIS. SCI.	ENGLISH	33			12300 TWINBROOK PARKWAY, ROCKVILLE, MD 20852-1606 USA	JAN	6	ROCKVILLE	23299485	J	ASSOC RESEARCH VISION OPHTHALMOLOGY INC	2013		SUNG, KR (CORRESPONDING AUTHOR), UNIV ULSAN, COLL MED, ASAN MED CTR, DEPT OPHTHALMOL, 388-1 PUNGNAP 2 DONG, SEOUL 138736, SOUTH KOREA.	OPHTHALMOLOGY			0146-0404	INVESTIGATIVE OPHTHALMOLOGY & VISUAL SCIENCE
WEN JC;COUSINS SW;SCHUMAN SG;ALLINGHAM RR	WEN, JOANNE C.;COUSINS, SCOTT W.;SCHUMAN, STEFANIE G.;ALLINGHAM, R. RAND	ALKIN Z, 2013, EUR J OPHTHALMOL, V23, P504, DOI 10.5301/EJO.5000241;BAKRI SJ, 2009, EYE, V23, P181, DOI 10.1038/SJ.EYE.6702938;BAKRI SJ, 2014, OPHTHALMOLOGY, V121, P1102, DOI 10.1016/J.OPHTHA.2013.11.029;BROWN DM, 2006, NEW ENGL J MED, V355, P1432, DOI 10.1056/NEJMOA062655;CHENG JW, 2014, PLOS ONE, V9, DOI 10.1371/JOURNAL.PONE.0103222;FOSTER PJ, 2000, ARCH OPHTHALMOL-CHIC, V118, P1105, DOI 10.100…	PURPOSE:TO USE ANTERIOR SEGMENT OPTICAL COHERENCE TOMOGRAPHY (AS-OCT) TO EVALUATE THE ANTERIOR CHAMBER AFTER INTRAVITREAL ANTI-VASCULAR ENDOTHELIAL GROWTH FACTOR (ANTI-VEGF) INJECTIONS.METHODS:PREINJECTION AND IMMEDIATE POSTINJECTION AS-OCT IMAGES WERE TAKEN AND MEASUREMENTS WERE COMPARED INCLUDING ANGLE OPENING DISTANCE (AOD) AND TRABECULO-IRIS SPACE AREA (TISA) AT 500 M AND 750 M FROM THE SCLER…				1874	UNIV WASHINGTON, DEPT OPHTHALMOL, BOX 359608,325 NINTH AVE, SEATTLE, WA 98105 USA.; DUKE UNIV EYE CTR, DEPT OPHTHALMOL, DURHAM, NC USA.;	UNIVERSITY OF WASHINGTON; UNIVERSITY OF WASHINGTON SEATTLE; DUKE UNIVERSITY					2024-02-18	ANTERIOR SEGMENT; ANTERIOR-SEGMENT OPTICAL COHERENCE TOMOGRAPHY (AS-OCT); ANTI-VASCULAR ENDOTHELIAL GROWTH FACTORS (ANTI-VEGF); INTRAVITREAL INJECTION	10.1097/IAE.0000000000001018	ARTICLE			1539-2864	WENJC@UW.EDU	1881		RESEARCH TO PREVENT BLINDNESS DUKE'S UNRESTRICTED GRANT AWARD	RESEARCH TO PREVENT BLINDNESS-2014 DUKE'S UNRESTRICTED GRANT AWARD. THE FUNDING ORGANIZATION HAD NO ROLE IN THE DESIGN OR CONDUCT OF THIS RESEARCH.	DZ6US	OPTICAL COHERENCE TOMOGRAPHY; INTRAOCULAR-PRESSURE CHANGES; LIGHT-DARK CHANGES; MACULAR DEGENERATION; CLOSURE GLAUCOMA; RANIBIZUMAB LUCENTIS; OCCLUDABLE ANGLES; OCULAR BIOMETRY; SEGMENT OCT; BEVACIZUMAB	10	RETINA-J RET VIT DIS	RETIN.-J. RETIN. VITR. DIS.	ENGLISH	39			TWO COMMERCE SQ, 2001 MARKET ST, PHILADELPHIA, PA 19103 USA	OCT	8	PHILADELPHIA	26938953	J	LIPPINCOTT WILLIAMS & WILKINS	2016		WEN, JC (CORRESPONDING AUTHOR), UNIV WASHINGTON, DEPT OPHTHALMOL, BOX 359608,325 NINTH AVE, SEATTLE, WA 98105 USA.	OPHTHALMOLOGY			0275-004X	RETINA-THE JOURNAL OF RETINAL AND VITREOUS DISEASES
KLINK T;PANIDOU E;KANZOW-TERAI B;KLINK J;SCHLUNCK G;GREHN FJ	KLINK, THOMAS;PANIDOU, ERMIONI;KANZOW-TERAI, BARBARA;KLINK, JANINE;SCHLUNCK, GUENTHER;GREHN, FRANZ J.	APTEL F, 2009, EUR J OPHTHALMOL, V19, P223, DOI 10.1177/112067210901900208;CARASSA RG, 1998, EUR J OPHTHALMOL, V8, P57, DOI 10.1177/112067219800800201;DRÜSEDAU MUH, 2000, J CATARACT REFR SURG, V26, P1367, DOI 10.1016/S0886-3350(00)00449-1;GRIESHABER MC, 2010, EYE, V24, P1220, DOI 10.1038/EYE.2009.317;GRIESHABER MC, 2009, KLIN MONATSBL AUGENH, V226, P245, DOI 10.1055/S-0028-1109305;GRIESHABER MC, …	PURPOSE: AIM OF THE STUDY WAS TO ASSESS THE DEVELOPMENT OF FILTERING BLEBS AFTER CANALOPLASTY. METHODS: TWENTY EYES OF 20 CONSECUTIVE PATIENTS RECEIVING CANALOPLASTY WERE INCLUDED. ALL EYES WERE EXAMINED CLINICALLY (SLIT LAMP), AND BY ANTERIOR SEGMENT OPTICAL COHERENCE TOMOGRAPHY AND HIGH-FREQUENCY ULTRASOUND BIOMICROSCOPY TO DETECT FILTERING BLEBS. PREOPERATIVE AND POSTOPERATIVE INTRAOCULAR PRES…				89	UNIV HOSP WURZBURG, DEPT OPHTHALMOL, D-97080 WURZBURG, GERMANY.; KLIN WURZBURG, WURZBURG, GERMANY.;	UNIVERSITY OF WURZBURG					2024-02-18	GLAUCOMA SURGERY; CANALOPLASTY; NONPENETRATING GLAUCOMA SURGERY; FILTERING BLEB; ANTERIOR SEGMENT OCT; HIGH-FREQUENCY ULTRASOUND BIOMICROSCOPY	10.1097/IJG.0b013e3182027905	ARTICLE				KLINK_T@KLINIK.UNI-WUERZBURG.DE	94				894BY	OPEN-ANGLE GLAUCOMA; OPTICAL COHERENCE TOMOGRAPHY; ULTRASOUND BIOMICROSCOPY; FLEXIBLE MICROCATHETER; CIRCUMFERENTIAL VISCODILATION; CATARACT-SURGERY; VISCOCANALOSTOMY; ADULTS	2	J GLAUCOMA	J. GLAUCOMA	ENGLISH	19			530 WALNUT ST, PHILADELPHIA, PA 19106-3621 USA	FEB	6	PHILADELPHIA	21278586	J	LIPPINCOTT WILLIAMS & WILKINS	2012		KLINK, T (CORRESPONDING AUTHOR), UNIV HOSP WURZBURG, DEPT OPHTHALMOL, JOSEF SCHNEIDER STR 11, D-97080 WURZBURG, GERMANY.	OPHTHALMOLOGY			1057-0829	JOURNAL OF GLAUCOMA
WAIBEL S;SPOERL E;FURASHOVA O;PILLUNAT LE;PILLUNAT KR	WAIBEL, SOEREN;SPOERL, EBERHARD;FURASHOVA, OLGA;PILLUNAT, LUTZ E.;PILLUNAT, KARIN R.	AZUARA-BLANCO A, 1998, SURV OPHTHALMOL, V43, P93, DOI 10.1016/S0039-6257(98)00025-3;CAGLAR C, 2016, J GLAUCOMA, V25, PE377, DOI 10.1097/IJG.0000000000000377;CAIRNS JE, 1968, AM J OPHTHALMOL, V66, P673, DOI 10.1016/0002-9394(68)91288-9;CANTOR LB, 2003, J GLAUCOMA, V12, P266, DOI 10.1097/00061198-200306000-00015;CHEN CW, 1983, TRANS ASIA PACIF ACAD OPHTHALMOL, V9, P172;CIANCAGLINI M, 2008, J GLAUCO…	PURPOSE: THE MAIN AIM OF THIS ARTICLE WAS TO STUDY THE LONGITUDINAL CORRELATION BETWEEN THE CLINICAL, MORPHOLOGICAL APPEARANCE OF FILTERING BLEBS WITH ANTERIOR SEGMENT OPTICAL COHERENCE TOMOGRAPHY (AS-OCT) IN THE EARLY POSTOPERATIVE PERIOD. METHODS: THIRTY EYES OF 30 GLAUCOMA PATIENTS SCHEDULED FOR FIRST-TIME TRABECULECTOMY WITH 0.02% MITOMYCIN-C WERE CONSECUTIVELY ENROLLED. THE FILTERING BLEBS W…				447	TECH UNIV, MED FAC CARL GUSTAV CARUS, DEPT OPHTHALMOL, FETSCHERSTR 74, D-01307 DRESDEN, GERMANY.; KLINIKUM CHEMNITZ, DEPT OPHTHALMOL, CHEMNITZ, GERMANY.;	TECHNISCHE UNIVERSITAT DRESDEN; CARL GUSTAV CARUS UNIVERSITY HOSPITAL; CHEMNITZ CLINIC					2024-02-18	GLAUCOMA SURGERY; ANTERIOR SEGMENT OPTICAL COHERENCE TOMOGRAPHY; BLEB MORPHOLOGY; ENCAPSULATED FILTERING BLEB; TRABECULECTOMY	10.1097/IJG.0000000000001206	ARTICLE			1536-481X	SOEREN.WAIBEL@UNIKLINIKUM-DRESDEN.DE	451				HX9PJ	VIVO CONFOCAL MICROSCOPY; FILTERING BLEBS; DEEP SCLERECTOMY; SURGERY	5	J GLAUCOMA	J. GLAUCOMA	ENGLISH	27		PILLUNAT, KARIN R/0000-0002-4400-6004	TWO COMMERCE SQ, 2001 MARKET ST, PHILADELPHIA, PA 19103 USA	MAY	5	PHILADELPHIA	30720575	J	LIPPINCOTT WILLIAMS & WILKINS	2019		WAIBEL, S (CORRESPONDING AUTHOR), TECH UNIV, MED FAC CARL GUSTAV CARUS, DEPT OPHTHALMOL, FETSCHERSTR 74, D-01307 DRESDEN, GERMANY.	OPHTHALMOLOGY			1057-0829	JOURNAL OF GLAUCOMA
ARIMURA S;TAKAMURA Y;TAKIHARA Y;MATSUMURA T;TOMOMATSU T;INATANI M	ARIMURA, SHOGO;TAKAMURA, YOSHIHIRO;TAKIHARA, YUJI;MATSUMURA, TAKEHIRO;TOMOMATSU, TAKESHI;INATANI, MASARU	APTEL F, 2010, OPHTHALMOLOGY, V117, PC, DOI 10.1016/J.OPHTHA.2009.10.030;BRON AJ, 2000, OPHTHALMOLOGICA, V214, P86, DOI 10.1159/000027475;CONGDON NG, 1997, OPHTHALMOLOGY, V104, P1489, DOI 10.1016/S0161-6420(97)30112-2;FOSTER PJ, 2001, BRIT J OPHTHALMOL, V85, P1277, DOI 10.1136/BJO.85.11.1277;GEORGE R, 2003, BRIT J OPHTHALMOL, V87, P399, DOI 10.1136/BJO.87.4.399;HE MG, 2006, INVEST OPHTH VIS SCI, …	PURPOSE TO IDENTIFY THE DETERMINANTS OF ANTERIOR CHAMBER ANGLE NARROWING AFTER MYDRIASIS BY QUANTITATIVE ASSESSMENT OF THE ANTERIOR CHAMBER COMPONENTS USING ANTERIOR SEGMENT OPTICAL COHERENCE TOMOGRAPHY (AS-OCT). METHODS IN THIS INTERVENTION STUDY, ANTERIOR CHAMBER ANGLE ANALYSIS WAS PERFORMED USING AS-OCT IN PATIENTS WITH CATARACT BEFORE PHARMACOLOGICAL PUPILLARY DILATION AND 30 MIN AFTERWARDS. …				307	UNIV FUKUI, FAC MED SCI, DEPT OPHTHALMOL, FUKUI 9101193, JAPAN.;	UNIVERSITY OF FUKUI					2024-02-18	ANGLE ANALYSIS; ANTERIOR CHAMBER COMPONENTS; ANTERIOR SEGMENT OPTICAL COHERENCE TOMOGRAPHY; LENS VAULT; MYDRIASIS	10.1007/s00417-014-2817-x	ARTICLE			1435-702X	YTAKAMURA@HOTMAIL.COM	312		GRANTS-IN-AID FOR SCIENTIFIC RESEARCH [24390395] FUNDING SOURCE: KAKEN		CA6FI	CLOSURE GLAUCOMA; RISK-FACTOR; CHINESE; ASSOCIATION; BIOMETRY; SINGAPORE; AREA; EYES	2	GRAEF ARCH CLIN EXP	GRAEFES ARCH. CLIN. EXP. OPHTHALMOL.	ENGLISH	22			ONE NEW YORK PLAZA, SUITE 4600, NEW YORK, NY, UNITED STATES	FEB	6	NEW YORK	25311654	J	SPRINGER	2015		TAKAMURA, Y (CORRESPONDING AUTHOR), UNIV FUKUI, FAC MED SCI, DEPT OPHTHALMOL, 23-3 SHIMOAIZUKI, FUKUI 9101193, JAPAN.	OPHTHALMOLOGY			0721-832X	GRAEFES ARCHIVE FOR CLINICAL AND EXPERIMENTAL OPHTHALMOLOGY
BEN AOUN S;HACHICHA I;BOURAOUI R;EL MATRI K;LIMAIEM R;EL MATRI L	BEN AOUN, SAFA;HACHICHA, INES;BOURAOUI, RIM;EL MATRI, KHALED;LIMAIEM, RIM;EL MATRI, LEILA	AGARWAL R., BMJ CASE REP, V14;ALBERS EC, 1958, AM J OPHTHALMOL, V46, P794, DOI 10.1016/0002-9394(58)90990-5;CARNEVALINI A, 1988, J FR OPHTALMOL, V11, P329;CHEN YY, 2017, BMC OPHTHALMOL, V17, DOI 10.1186/S12886-017-0418-2;GOGAKI E., 2011, CLIN OPHTHALMOL;GOGAKI E, 2011, CLIN OPHTHALMOL, V5, P381, DOI 10.2147/OPTH.S17269;GOYENECHE HFG., 2018, PAN-AMERICAN J OPHTHALMOL, V17, P84;LAARIBI N, 2017, J F…	PURPOSE: TO DESCRIBE CLINICAL AND ANTERIOR SEGMENT OPTICAL COHERENCE TOMOGRAPHY (AS-OCT) FINDINGS IN A PATIENT WITH BILATERAL IRIDOSCHISIS AND UNILATERAL ANGLE CLOSURE GLAUCOMA (ACG) ASSOCIATED WITH ABNORMAL VISIBILITY OF IRIS VESSELS. CASE PRESENTATION: A 67-YEAR-OLD MALE PATIENT WITH A HISTORY OF RED AND PAINFUL LEFT EYE (LE) ONE YEAR EARLIER, PRESENTED TO OUR OPHTHALMOLOGY DEPARTMENT FOR A ROU…					INST HEDI RAIES OPHTALMOL TUNIS, DEPT OPHTHALMOL B, TUNIS, TUNISIA.; UNIV TUNIS EL MANAR, FAC MED TUNIS, TUNIS, TUNISIA.; OCULOGENET LAB LR14SP01, TUNIS, TUNISIA.;	UNIVERSITE DE TUNIS-EL-MANAR; INSTITUT HEDI RAIES D'OPHTALMOLOGIE DE TUNIS; UNIVERSITE DE TUNIS-EL-MANAR; FACULTE DE MEDECINE DE TUNIS (FMT); UNIVERSITE DE TUNIS-EL-MANAR; INSTITUT HEDI RAIES D'OPHTALMOLOGIE DE TUNIS					2024-02-18	IRIDOSCHISIS; ANGLE CLOSURE GLAUCOMA; ATYPICAL PRESENTATION; ANTERIOR SEGMENT OPTICAL COHERENCE TOMOGRAPHY	10.1177/11206721231206792	ARTICLE; EARLY ACCESS	OCT 2023		1724-6016	KHALED.ELMATRI@GMAIL.COM					W5OK5	ANGLE; GLAUCOMA		EUR J OPHTHALMOL	EUR. J. OPHTHALMOL.	ENGLISH	16		BEN AOUN, SAFA/0000-0002-0864-1449	1 OLIVERS YARD, 55 CITY ROAD, LONDON EC1Y 1SP, ENGLAND	2023 OCT 6	5	LONDON	37801513	J	SAGE PUBLICATIONS LTD	2023		EL MATRI, K (CORRESPONDING AUTHOR), INST HEDI RAIES OPHTALMOL TUNIS, DEPT OPHTHALMOL B, TUNIS, TUNISIA.	OPHTHALMOLOGY			1120-6721	EUROPEAN JOURNAL OF OPHTHALMOLOGY
NOLAN WP;SEE JL;CHEW PTK;FRIEDMAN DS;SMITH SD;RADHAKRISHNAN S;ZHENG C;FOSTER PJ;AUNG T	NOLAN, WINIFRED P.;SEE, JOVINA L.;CHEW, PAUL T. K.;FRIEDMAN, DAVID S.;SMITH, SCOTT D.;RADHAKRISHNAN, SUNITA;ZHENG, CE;FOSTER, PAUL J.;AUNG, TIN	CONGDON N, 1992, SURV OPHTHALMOL, V36, P411, DOI 10.1016/S0039-6257(05)80022-0;DANDONA L, 2000, OPHTHALMOLOGY, V107, P1710, DOI 10.1016/S0161-6420(00)00274-8;DEVEREUX JG, 2000, ARCH OPHTHALMOL-CHIC, V118, P257;FOSTER PJ, 2004, BRIT J OPHTHALMOL, V88, P486, DOI 10.1136/BJO.2003.020016;FOSTER PJ, 1996, ARCH OPHTHALMOL-CHIC, V114, P1235, DOI 10.1001/ARCHOPHT.1996.01100140435011;FOSTER PJ, 2000, BRIT…	OBJECTIVE: TO EVALUATE NONCONTACT ANTERIOR SEGMENT OPTICAL COHERENCE TECHNOLOGY (AS-OCT) AS A QUALITATIVE METHOD OF IMAGING THE ANTERIOR CHAMBER ANGLE AND TO DETERMINE ITS ABILITY TO DETECT PRIMARY ANGLE CLOSURE WHEN COMPARED WITH GONIOSCOPY IN ASIAN SUBJECTS. DESIGN: PROSPECTIVE OBSERVATIONAL CASE SERIES. PARTICIPANTS: TWO HUNDRED THREE SUBJECTS WERE RECRUITED FROM GLAUCOMA CLINICS IN SINGAPORE …				33	INST OPHTHALMOL, DEPT EPIDEMIOL & INT EYE HTLH, LONDON EC1V 9EL, ENGLAND.; NATL UNIV SINGAPORE HOSP, SINGAPORE 117548, SINGAPORE.; NATL UNIV SINGAPORE, SINGAPORE 117548, SINGAPORE.; JOHNS HOPKINS UNIV, BLOOMBERG SCH PUBL HLTH, BALTIMORE, MD USA.; WILMER EYE INST, BALTIMORE, MD USA.; COLE EYE INST, CLEVELAND, OH USA.; MOORFIELDS EYE HOSP, LONDON, ENGLAND.;	UNIVERSITY OF LONDON; UNIVERSITY COLLEGE LONDON; NATIONAL UNIVERSITY OF SINGAPORE; NATIONAL UNIVERSITY OF SINGAPORE; JOHNS HOPKINS UNIVERSITY; JOHNS HOPKINS BLOOMBERG SCHOOL OF PUBLIC HEALTH; JOHNS HOPKINS UNIVERSITY; JOHNS HOPKINS MEDICINE; UNIVERSITY OF LONDON; UNIVERSITY COLLEGE LONDON; MOORFIELDS EYE HOSPITAL NHS FOUNDATION TRUST					2024-02-18		10.1016/j.ophtha.2006.05.073	ARTICLE			1549-4713	WINNIE_NOLAN@YAHOO.COM	39				123DA	OCCLUDABLE ANGLES; CHAMBER DEPTH; GLAUCOMA; POPULATION	1	OPHTHALMOLOGY	OPHTHALMOLOGY	ENGLISH	17		FOSTER, PAUL/0000-0002-4755-177X; FRIEDMAN, DAVID/0000-0002-2055-5797	STE 800, 230 PARK AVE, NEW YORK, NY 10169 USA	JAN	7	NEW YORK	17070597	J	ELSEVIER SCIENCE INC	2007	TIN, AUNG/B-6521-2009; FOSTER, PAUL/V-7288-2019	NOLAN, WP (CORRESPONDING AUTHOR), INST OPHTHALMOL, DEPT EPIDEMIOL & INT EYE HTLH, BATH ST, LONDON EC1V 9EL, ENGLAND.	OPHTHALMOLOGY			0161-6420	OPHTHALMOLOGY
LI HT;LEUNG CKS;CHEUNG CYL;WONG L;PANG CP;WEINREB RN;LAM DSC	LI, HAITAO;LEUNG, CHRISTOPHER KAI SHUN;CHEUNG, CAROL YIM LUI;WONG, LEE;PANG, CHI PUI;WEINREB, ROBERT NEAL;LAM, DENNIS SHUN CHIU	ESAKI K, 2000, JPN J OPHTHALMOL, V44, P46, DOI 10.1016/S0021-5155(99)00173-2;ISHIKAWA H, 2000, OPHTHALMIC SURG LAS, V31, P342;ISHIKAWA H, 1999, JPN J OPHTHALMOL, V43, P526, DOI 10.1016/S0021-5155(99)00139-2;MÜLLER M, 2006, J CATARACT REFR SURG, V32, P1803, DOI 10.1016/J.JCRS.2006.07.014;PAVLIN CJ, 1992, AM J OPHTHALMOL, V113, P381, DOI 10.1016/S0002-9394(14)76159-8;PAVLIN CJ, 1991, OPHTHALMOLOGY,…	AIM: TO EVALUATE THE REPEATABILITY AND REPRODUCIBILITY OF ANTERIOR CHAMBER ANGLE MEASUREMENT OBTAINED BY ANTERIOR SEGMENT OPTICAL COHERENCE TOMOGRAPHY. METHODS: TWENTY-FIVE NORMAL SUBJECTS WERE INVITED FOR ANTERIOR CHAMBER ANGLE IMAGING WITH AN ANTERIOR SEGMENT OPTICAL COHERENCE TOMOGRAPHY (OCT) ON ONE RANDOMLY SELECTED EYE IN THREE SEPARATE VISITS WITHIN A WEEK. EACH EYE WAS IMAGED THREE TIMES U…				1490	CHINESE UNIV HONG KONG, DEPT OPHTHALMOL & VISUAL SCI, HONG KONG, HONG KONG, PEOPLES R CHINA.; UNIV CALIF SAN DIEGO, HAMILTON GLAUCOMA CTR, DEPT OPHTHALMOL, SAN DIEGO, CA 92103 USA.;	CHINESE UNIVERSITY OF HONG KONG; UNIVERSITY OF CALIFORNIA SYSTEM; UNIVERSITY OF CALIFORNIA SAN DIEGO					2024-02-18		10.1136/bjo.2007.118901	ARTICLE			1468-2079	TLIMS00@HOTMAIL.COM	1492				221LN	ULTRASOUND BIOMICROSCOPY; INTRAOBSERVER	11	BRIT J OPHTHALMOL	BR. J. OPHTHALMOL.	ENGLISH	10	GREEN PUBLISHED	LEUNG, CHRIS/0000-0003-4862-777X; CHEUNG, CAROL/0000-0002-9672-1819; CHEUNG, CAROL/0000-0003-0869-859X	BRITISH MED ASSOC HOUSE, TAVISTOCK SQUARE, LONDON WC1H 9JR, ENGLAND	NOV	3	LONDON	17475709	J	BMJ PUBLISHING GROUP	2007	LEUNG, CHRIS/N-8015-2019; LAM, DENNIS/AAL-1211-2020; CHEUNG, CAROL/AAF-1101-2020; CHEUNG, CAROL Y./G-7895-2016; PANG, CHI P/I-5388-2014	LEUNG, CKS (CORRESPONDING AUTHOR), CHINESE UNIV HONG KONG, HOSP EYE, DEPT OPHTHALMOL & VISUAL SCI, 147 ARGYLE ST, KOWLOON, HONG KONG, PEOPLES R CHINA.	OPHTHALMOLOGY			0007-1161	BRITISH JOURNAL OF OPHTHALMOLOGY
BASKARAN M;IYER JV;NARAYANASWAMY AK;HE YK;SAKATA LM;WU RY;LIU DN;NONGPIUR ME;FRIEDMAN DS;AUNG T	BASKARAN, MANI;IYER, JAYANT V.;NARAYANASWAMY, ARUN K.;HE, YINGKE;SAKATA, LISANDRO M.;WU, RENYI;LIU, DIANNA;NONGPIUR, MONISHA E.;FRIEDMAN, DAVID S.;AUNG, TIN	DOOLEY I, 2010, EYE, V24, P520, DOI 10.1038/EYE.2009.339;FLECK BW, 1997, BRIT J OPHTHALMOL, V81, P884, DOI 10.1136/BJO.81.10.884;FOSTER PJ, 2000, ARCH OPHTHALMOL-CHIC, V118, P1105, DOI 10.1001/ARCHOPHT.118.8.1105;LAVANYA R, 2008, OPHTHALMOLOGY, V115, P1720, DOI 10.1016/J.OPHTHA.2008.03.015;LEE Y, 2012, INVEST OPHTH VIS SCI, V53, P693, DOI 10.1167/IOVS.11-8389;NOLAN WP, 2007, OPHTHALMOLOGY, V114, …	PURPOSE: TO INVESTIGATE THE INCIDENCE OF GONIOSCOPIC ANGLE CLOSURE AFTER 4 YEARS IN SUBJECTS WITH GONIOSCOPICALLY OPEN ANGLES BUT VARYING DEGREES OF ANGLE CLOSURE DETECTED ON ANTERIOR SEGMENT OPTICAL COHERENCE TOMOGRAPHY (AS OCT; VISANTE; CARL ZEISS MEDITEC, DUBLIN, CA) AT BASELINE. DESIGN: PROSPECTIVE, OBSERVATIONAL STUDY. PARTICIPANTS: THREE HUNDRED FORTY-TWO SUBJECTS, MOSTLY CHINESE, 50 YEARS …				2380	SINGAPORE EYE RES INST, SINGAPORE, SINGAPORE.; SINGAPORE NATL EYE CTR, SINGAPORE 168751, SINGAPORE.; DUKE NUS GRAD MED SCH, SINGAPORE, SINGAPORE.; NATL UNIV SINGAPORE, YONG LOO LIN SCH MED, SINGAPORE 117595, SINGAPORE.; UNIV FED PARANA, BR-80060000 CURITIBA, PARANA, BRAZIL.; XIAMEN UNIV, XIAMEN EYE CTR, XIAMEN, PEOPLES R CHINA.; JOHNS HOPKINS UNIV, WILMER EYE INST, DANA CTR PREVENT OPHTHALMOL, BA…	SINGAPORE NATIONAL EYE CENTER; NATIONAL UNIVERSITY OF SINGAPORE; SINGAPORE NATIONAL EYE CENTER; NATIONAL UNIVERSITY OF SINGAPORE; NATIONAL UNIVERSITY OF SINGAPORE; UNIVERSIDADE FEDERAL DO PARANA; XIAMEN UNIVERSITY; JOHNS HOPKINS UNIVERSITY; JOHNS HOPKINS MEDICINE					2024-02-18		10.1016/j.ophtha.2015.07.030	ARTICLE			1549-4713	AUNG.TIN@SNEC.COM.SG	2384		SINGHEALTH FOUNDATION, SINGAPORE, REPUBLIC OF SINGAPORE; NATIONAL MEDICAL RESEARCH COUNCIL, SINGAPORE, REPUBLIC OF SINGAPORE	SUPPORTED BY THE SINGHEALTH FOUNDATION, SINGAPORE, REPUBLIC OF SINGAPORE; AND THE NATIONAL MEDICAL RESEARCH COUNCIL, SINGAPORE, REPUBLIC OF SINGAPORE.	CZ4EZ	OPTICAL COHERENCE TOMOGRAPHY; INTRAOCULAR-PRESSURE; GLAUCOMA; POPULATION; PARAMETERS; SINGAPORE; EYES	12	OPHTHALMOLOGY	OPHTHALMOLOGY	ENGLISH	13		WU, RENYI/0000-0002-5945-0124; FRIEDMAN, DAVID/0000-0002-2055-5797	360 PARK AVE SOUTH, NEW YORK, NY 10010-1710 USA	DEC	5	NEW YORK	26359189	J	ELSEVIER SCIENCE INC	2015	MANI, BASKARAN/GWZ-8299-2022; TIN, AUNG/B-6521-2009; WU, RENYI/HTN-2323-2023	AUNG, T (CORRESPONDING AUTHOR), SINGAPORE NATL EYE CTR, 11 THIRD HOSP AVE, SINGAPORE 168751, SINGAPORE.	OPHTHALMOLOGY			0161-6420	OPHTHALMOLOGY
PHU J;WANG H;KHOU V;ZHANG S;KALLONIATIS M	PHU, JACK;WANG, HENRIETTA;KHOU, VINCENT;ZHANG, SOPHIA;KALLONIATIS, MICHAEL	ASIAN PACIFIC GLAUCOMA SOCIETY (APGS), 2016, AS PAC GLAUC GUID;AZUARA-BLANCO A, 2007, BRIT J OPHTHALMOL, V91, P1639, DOI 10.1136/BJO.2007.119628;BAKER H, 2016, OPHTHAL PHYSL OPT, V36, P545, DOI 10.1111/OPO.12312;BARKANA Y, 2007, ARCH OPHTHALMOL-CHIC, V125, P1331, DOI 10.1001/ARCHOPHT.125.10.1331;BLIEDEN LS, 2015, INVEST OPHTH VIS SCI, V56, P2842, DOI 10.1167/IOVS.14-15883;BOODHNA T, 2015, EYE, V2…	PURPOSE: TO EVALUATE THE AGREEMENT AND ACCURACY OF GRADING GONIOPHOTOGRAPHS AND ANTERIOR SEGMENT OPTICAL COHERENCE TOMOGRAPHY (AS-OCT) RESULTS FOR ASSESSMENT OF THE ANTERIOR CHAMBER ANGLE, AND ELICIT FACTORS DRIVING CONCORDANCE BETWEEN PERCEIVED GRADE AND GROUND TRUTH. METHODS: THREE CLINICIANS EVALUATED THE GONIOPHOTOGRAPHS AND AS-OCT RESULTS OF 75 PATIENTS. GRADERS' IMPRESSIONS OF THE ANGLE GRA…	16				UNIV NEW SOUTH WALES, CTR EYE HLTH, KENSINGTON, NSW, AUSTRALIA.; UNIV NEW SOUTH WALES, SCH OPTOMETRY & VIS SCI, KENSINGTON, NSW, AUSTRALIA.;	UNIVERSITY OF NEW SOUTH WALES SYDNEY; UNIVERSITY OF NEW SOUTH WALES SYDNEY					2024-02-18	GLAUCOMA; ANGLE CLOSURE; NARROW ANGLES; GONIOSCOPY; ANTERIOR SEGMENT OPTICAL COHERENCE TOMOGRAPHY	10.1167/tvst.8.5.16	ARTICLE				JPHU@CFEH.COM.AU			GUIDE DOGS NSW/ACT; AUSTRALIAN GOVERNMENT; GUIDE DOGS NSW/ACT PHD SCHOLARSHIP	THE AUTHORS THANK THE STAFF AT CENTRE FOR EYE HEALTH FOR THEIR ASSISTANCE. THE AUTHORS ACKNOWLEDGE THE FUNDING PROVIDED TO THE CENTRE FOR EYE HEALTH BY GUIDE DOGS NSW/ACT FOR THE DELIVERY OF CLINICAL SERVICES AND SALARY SUPPORT FOR JP, HW, SZ, AND MK. VK IS SUPPORTED BY AN AUSTRALIAN GOVERNMENT RESEARCH TRAINING PROGRAM PHD SCHOLARSHIP AND A GUIDE DOGS NSW/ACT PHD SCHOLARSHIP. THE FUNDING BODIES …	JB8ZU	SCLERAL SPUR; GLAUCOMA PATIENTS; AGREEMENT; OPHTHALMOLOGISTS; OPTOMETRISTS; GONIOSCOPY; EYE; PREVALENCE; CARE; AUSTRALIA	5	TRANSL VIS SCI TECHN	TRANSL. VIS. SCI. TECHNOL.	ENGLISH	54	GREEN PUBLISHED, GOLD	PHU, JACK/0000-0002-9933-6780; KHOU, VINCENT/0000-0002-4696-9226; KALLONIATIS, MICHAEL/0000-0002-5264-4639; WANG, HENRIETTA/0000-0002-6694-7622	12300 TWINBROOK PARKWAY, ROCKVILLE, MD 20852-1606 USA	SEP	15	ROCKVILLE	31588379	J	ASSOC RESEARCH VISION OPHTHALMOLOGY INC	2019	PHU, JACK/AAO-6855-2020	PHU, J (CORRESPONDING AUTHOR), UNIV NEW SOUTH WALES, CTR EYE HLTH, KENSINGTON, NSW, AUSTRALIA.	OPHTHALMOLOGY			2164-2591	TRANSLATIONAL VISION SCIENCE & TECHNOLOGY
NADEEM S	NADEEM, SANA	AHMED TY, 2014, EYE, V28, P327, DOI 10.1038/EYE.2013.281;ALASIL T, 2013, OSLI RETINA, V44, PS19, DOI 10.3928/23258160-20131101-04;ANG M, 2018, PROG RETIN EYE RES, V66, P132, DOI 10.1016/J.PRETEYERES.2018.04.002;ANGMO DEWANG, 2016, OMAN J OPHTHALMOL, V9, P3, DOI 10.4103/0974-620X.176093;ANJOS R, 2014, INVEST OPHTH VIS SCI, V55;ASAM J. S., 2019, HIGH RESOLUTION IMAGING IN MICROSCOPY AND OPHTHALMOLO…	OBJECTIVETO ASSESS THE PEDIATRIC ANTERIOR SEGMENT CHARACTERISTICS IN OCULAR PATHOLOGY USING SPECTRAL DOMAIN OPTICAL COHERENCE TOMOGRAPHY (SD-OCT).METHODSTHIS CASE SERIES FOLLOWS 115 EYES OF 78 CHILDREN (2-17 YEARS) WITH ANTERIOR SEGMENT PATHOLOGY IN AN ACADEMIC FACILITY. THE ANTERIOR SEGMENT OCT (AS-OCT) ANALYSIS WAS DONE USING THE OPTOPOL REVO 80 HIGH-RESOLUTION SD-OCT USING AN IMAGING ADAPTER. …				691	FDN UNIV, FAUJI FDN HOSP, MED COLL, DEPT OPHTHALMOL, RAWALPINDI, PAKISTAN.; FDN UNIV ISLAMABAD, ISLAMABAD, PAKISTAN.;	QUAID I AZAM UNIVERSITY					2024-02-18	ANTERIOR SEGMENT; OPTICAL COHERENCE TOMOGRAPHY; PEDIATRIC; OCULAR; PATHOLOGY; DISEASES; EYE	10.1080/17434440.2023.2223966	ARTICLE; EARLY ACCESS	JUN 2023		1745-2422	SANA.NADEEM018@GMAIL.COM	702				L3ME0	CHAMBER ANGLE; OCT; CORNEAL; DIAGNOSIS	8	EXPERT REV MED DEVIC	EXPERT REV. MED. DEVICES	ENGLISH	42		NADEEM, SANA/0000-0003-3994-8774	2-4 PARK SQUARE, MILTON PARK, ABINGDON OR14 4RN, OXON, ENGLAND	2023 AUG 3	12	ABINGDON	37292025	J	TAYLOR & FRANCIS LTD	2023		NADEEM, S (CORRESPONDING AUTHOR), FDN UNIV, FAUJI FDN HOSP, MED COLL, DEPT OPHTHALMOL, RAWALPINDI, PAKISTAN.; NADEEM, S (CORRESPONDING AUTHOR), FDN UNIV ISLAMABAD, ISLAMABAD, PAKISTAN.	ENGINEERING			1743-4440	EXPERT REVIEW OF MEDICAL DEVICES
MOGHIMI S;LATIFI G;ZANDVAKIL N;MOHAMMADI M;KHATIBI N;SOLTANI-MOGHADAM R;LIN S	MOGHIMI, SASAN;LATIFI, GOLSHAN;ZANDVAKIL, NARGES;MOHAMMADI, MASSOOD;KHATIBI, NASSIM;SOLTANI-MOGHADAM, REZA;LIN, SHAN	DADA T, 2007, J CATARACT REFR SURG, V33, P837, DOI 10.1016/J.JCRS.2007.01.021;ESLAMI Y, 2013, CLIN EXP OPHTHALMOL, V41, P368, DOI 10.1111/J.1442-9071.2012.02871.X;FAKHRAIE G, 2012, EUR J OPHTHALMOL, V155, P664;FRIEDMAN DS, 2003, ARCH OPHTHALMOL-CHIC, V121, P633, DOI 10.1001/ARCHOPHT.121.5.633;GUNNING FP, 1998, J CATARACT REFR SURG, V24, P1347, DOI 10.1016/S0886-3350(98)80227-7;HAYASHI K, 2001, J …	PURPOSE:TO COMPARE THE EFFECT OF PHACOEMULSIFICATION (PHACO) VERSUS COMBINED PHACOEMULSIFICATION AND VISCOGONIOPLASTY (PHACO-VGP) ON LONG-TERM INTRAOCULAR PRESSURE (IOP) IN PRIMARY ANGLE-CLOSURE GLAUCOMA (PACG).METHODS:IN THIS PROSPECTIVE RANDOMIZED CLINICAL TRIAL, 92 EYES OF 82 PATIENTS WITH PACG AND COEXISTING CATARACT WERE RANDOMIZED TO UNDERGO PHACO ALONE (46 EYES) OR PHACO-VGP (45 EYES) AND …				575	UNIV TEHRAN MED SCI, FARABI EYE RES CTR, TEHRAN 133661635, IRAN.; UNIV CALIF SAN FRANCISCO, DEPT OPHTHALMOL, SAN FRANCISCO SCH MED, SAN FRANCISCO, CA USA.;	TEHRAN UNIVERSITY OF MEDICAL SCIENCES; UNIVERSITY OF CALIFORNIA SYSTEM; UNIVERSITY OF CALIFORNIA SAN FRANCISCO					2024-02-18	PHACOEMULSIFICATION; VISCOGONIOPLASTY; PRIMARY ANGLE-CLOSURE GLAUCOMA; ANTERIOR SEGMENT OPTICAL COHERENCE TOMOGRAPHY; ANTERIOR CHAMBER DEPTH; INTRAOCULAR PRESSURE	10.1097/IJG.0000000000000196	ARTICLE			1536-481X	SASANIMII@YAHOO.COM	582				CU1UC	INTRAOCULAR-PRESSURE REDUCTION; ANTERIOR-CHAMBER ANGLE; COMBINED PHACOTRABECULECTOMY; COEXISTING CATARACT; LENS IMPLANTATION; EYES; EXTRACTION; PACG; VISCOGONIOSYNECHIALYSIS; GONIOSYNECHIALYSIS	8	J GLAUCOMA	J. GLAUCOMA	ENGLISH	38		LATIFI, GOLSHAN/0000-0003-3060-772X; MOGHADAM, REZA SOLTANI/0000-0001-9661-3036; MOHAMMADI, MASSOOD/0000-0002-3017-6643	TWO COMMERCE SQ, 2001 MARKET ST, PHILADELPHIA, PA 19103 USA	OCT-NOV	8	PHILADELPHIA	25393036	J	LIPPINCOTT WILLIAMS & WILKINS	2015	LATIFI, GOLSHAN/ABE-4270-2020; MOGHADAM, REZA SOLTANI/I-5074-2017; MOHAMMADI, MASSOOD/ABG-2563-2020	MOGHIMI, S (CORRESPONDING AUTHOR), UNIV TEHRAN MED SCI, FARABI EYE RES CTR, QAZVIN SQ,SOUTH KARGAR AVE, TEHRAN 133661635, IRAN.	OPHTHALMOLOGY			1057-0829	JOURNAL OF GLAUCOMA
SAYEGH RR;PINEDA R	SAYEGH, RONY R.;PINEDA, ROBERTO, II	ANWAR M, 2002, CORNEA, V21, P374, DOI 10.1097/00003226-200205000-00009;AVILA M, 2006, J CATARACT REFR SURG, V32, P1836, DOI 10.1016/J.JCRS.2006.07.015;BANITT M, 2009, EYE, V23, P1972, DOI 10.1038/EYE.2008.377;BASU S, 2011, ARVO ISIE, P85;CADE F, 2011, CORNEA, V30, P1322, DOI 10.1097/ICO.0B013E31821EEAD6;CHOMA MA, 2003, OPT EXPRESS, V11, P2183, DOI 10.1364/OE.11.002183;CHUA J, 2009, CORNEA, V28, P…	ANTERIOR SEGMENT OPTICAL COHERENCE TOMOGRAPHY (AS-OCT) HAS RECENTLY EMERGED AS AN IMPORTANT MODALITY FOR IMAGING OF THE CORNEA. SINCE ITS INTRODUCTION LESS THAN A DECADE AGO, IT HAS BEEN CLINICALLY USED FOR THE DIAGNOSIS AND MANAGEMENT OF AN EXPANDING NUMBER OF CORNEAL CONDITIONS. IN THIS REVIEW, WE WILL DISCUSS THE APPLICATIONS OF ANTERIOR SEGMENT OPTICAL COHERENCE TOMOGRAPHY AFTER CORNEAL SURGE…				125	HARVARD UNIV, SCH MED, DEPT OPHTHALMOL, MASSACHUSETTS EYE & EAR INFIRM, BOSTON, MA 02114 USA.;	HARVARD UNIVERSITY; MASSACHUSETTS EYE & EAR INFIRMARY; HARVARD MEDICAL SCHOOL					2024-02-18	CORNEAL SURGERY; CORNEA; OCULAR IMAGING; OPTICAL COHERENCE TOMOGRAPHY	10.3109/08820538.2012.707274	REVIEW			1744-5205	ROBERTO_PINEDA@MEEI.HARVARD.EDU	132				041SD	IN-SITU KERATOMILEUSIS; COLLAGEN CROSS-LINKING; SWEPT SOURCE OCT; PENETRATING KERATOPLASTY; LAMELLAR KERATOPLASTY; LASIK FLAP; ENDOTHELIAL KERATOPLASTY; SECONDARY GLAUCOMA; INTERFACE FLUID; INTACS	5-6	SEMIN OPHTHALMOL	SEMIN. OPHTHALMOL.	ENGLISH	82		SAYEGH, RONY/0000-0002-0119-4201	530 WALNUT STREET, STE 850, PHILADELPHIA, PA 19106 USA	SEP-NOV	8	PHILADELPHIA	23163266	J	TAYLOR & FRANCIS INC	2012	SAYEGH, RONY/G-8777-2013	PINEDA, R (CORRESPONDING AUTHOR), HARVARD UNIV, SCH MED, DEPT OPHTHALMOL, MASSACHUSETTS EYE & EAR INFIRM, 243 CHARLES ST, BOSTON, MA 02114 USA.	OPHTHALMOLOGY			0882-0538	SEMINARS IN OPHTHALMOLOGY
LATIFI G;MOGHIMI S;ESLAMI Y;FAKHRAIE G;ZAREI R;LIN S	LATIFI, GOLSHAN;MOGHIMI, SASAN;ESLAMI, YADOLLAH;FAKHRAIE, GHASEM;ZAREI, REZA;LIN, SHAN	DADA T, 2007, J CATARACT REFR SURG, V33, P837, DOI 10.1016/J.JCRS.2007.01.021;DAWCZYNSKI J, 2007, EUR J OPHTHALMOL, V17, P363, DOI 10.1177/112067210701700314;FAKHRAIE G, 2012, EUR J OPHTHALMOL;FOSTER PAUL J, 2002, SEMIN OPHTHALMOL, V17, P50;FRIEDMAN DS, 2003, ARCH OPHTHALMOL-CHIC, V121, P633, DOI 10.1001/ARCHOPHT.121.5.633;GAZZARD G., 2004, BR J OPHTHALMOL, V88, P1357;GUNNING FP, 1998, J CATARACT…	PURPOSE. TO EVALUATE THE ANATOMIC EFFECTS OF PHACOEMULSIFICATION ON DRAINAGE ANGLE STATUS IN PRIMARY ANGLE CLOSURE GLAUCOMA (PACG) USING ANTERIOR SEGMENT OPTICAL COHERENCE TOMOGRAPHY (AS-OCT). METHODS. A TOTAL OF 62 EYES OF 58 PATIENTS UNDERWENT CATARACT SURGERY IN FARABI RYE HOSPITAL, TEHRAN, IRAN. PATIENTS WERE EXAMINED POSTOPERATIVELY ON DAY 1, WEEK 1, AND WEEK 6. INDENTATION GONIOSCOPY AND AS…				70	UNIV TEHRAN MED SCI, FARABI EYE RES CTR, TEHRAN 1336616351, IRAN.; UNIV CALIF SAN FRANCISCO, SCH MED, DEPT OPHTHALMOL, SAN FRANCISCO, CA USA.;	TEHRAN UNIVERSITY OF MEDICAL SCIENCES; UNIVERSITY OF CALIFORNIA SYSTEM; UNIVERSITY OF CALIFORNIA SAN FRANCISCO					2024-02-18	ANTERIOR CHAMBER DEPTH; ANTERIOR SEGMENT OPTICAL COHERENCE TOMOGRAPHY; PERIPHERAL ANTERIOR SYNECHIAE; PHACOEMULSIFICATION; PRIMARY ANGLE CLOSURE GLAUCOMA	10.5301/ejo.5000191	ARTICLE			1724-6016	SASANIMII@YAHOO.COM	79				224VC	OPTICAL COHERENCE TOMOGRAPHY; INTRAOCULAR-PRESSURE REDUCTION; CHAMBER ANGLE; COMBINED PHACOTRABECULECTOMY; CATARACT-SURGERY; ULTRASOUND BIOMICROSCOPY; LENS IMPLANTATION; GLAUCOMA; SEGMENT; DEPTH	1	EUR J OPHTHALMOL	EUR. J. OPHTHALMOL.	ENGLISH	49		LATIFI, GOLSHAN/0000-0003-3060-772X;	1 OLIVERS YARD, 55 CITY ROAD, LONDON EC1Y 1SP, ENGLAND	JAN-FEB	10	LONDON	22865403	J	SAGE PUBLICATIONS LTD	2013	LATIFI, GOLSHAN/ABE-4270-2020; ZAREI, REZA/GRF-6080-2022	MOGHIMI, S (CORRESPONDING AUTHOR), UNIV TEHRAN MED SCI, FARABI EYE RES CTR, TEHRAN 1336616351, IRAN.	OPHTHALMOLOGY			1120-6721	EUROPEAN JOURNAL OF OPHTHALMOLOGY
LENZHOFER M;STROHMAIER C;HOHENSINN M;HITZL W;SPERL P;GERNER M;STEINER V;MOUSSA S;KRALL E;REITSAMER HA	LENZHOFER, MARKUS;STROHMAIER, CLEMENS;HOHENSINN, MELCHIOR;HITZL, WOLFGANG;SPERL, PHILIPP;GERNER, MATTHIAS;STEINER, VEIT;MOUSSA, SARAH;KRALL, EVA;REITSAMER, HERBERT A.	AZUARA-BLANCO A, 1998, SURV OPHTHALMOL, V43, P93, DOI 10.1016/S0039-6257(98)00025-3;BOUHENNI RA, 2016, J GLAUCOMA, V25, PE35, DOI 10.1097/IJG.0000000000000199;CAIRNS JE, 1968, AM J OPHTHALMOL, V66, P673, DOI 10.1016/0002-9394(68)91288-9;CANTOR LB, 2003, J GLAUCOMA, V12, P266, DOI 10.1097/00061198-200306000-00015;CONLON R, 2017, CAN J OPHTHALMOL, V52, P114, DOI 10.1016/J.JCJO.2016.07.013;DE FENDI …	PURPOSE LIKE THE CLASSIC TRABECULECTOMY, THE MINIMALLY INVASIVE, AB INTERNO XEN GLAUCOMA GEL MICROSTENT (XEN-GGM) CREATES A FILTRATION BLEB IN THE CONJUNCTIVA. THE GOAL OF THIS STUDY WAS TO INVESTIGATE INTERNAL BLEB MORPHOLOGY OVER TIME WITH ANTERIOR SEGMENT OPTICAL COHERENCE TOMOGRAPHY (AS-OCT) AFTER XEN-GGM IMPLANTATION. METHODS IN A PROSPECTIVE, SINGLE-CENTRE, SINGLE-ARMED COHORT STUDY, BLEBS …				E231	PARACELSUS MED UNIV, UNIV CLIN SALZBURG, DEPT OPHTHALMOL & OPTOMETRY, SALZBURG, AUSTRIA.; PARACELSUS MED UNIV, RES PROGRAM EXPT OPHTHALMOL & GLAUCOMA RES, SALZBURG, AUSTRIA.;	PARACELSUS PRIVATE MEDICAL UNIVERSITY; PARACELSUS PRIVATE MEDICAL UNIVERSITY					2024-02-18	GLAUCOMA; MINIMALLY INVASIVE GLAUCOMA SURGERY; SUBCONJUNCTIVAL IMPLANT; SURGICAL SUCCESS; XEN	10.1111/aos.13902	ARTICLE			1755-3768	M.LENZHOFER@SALK.AT	E237		RESEARCH PROGRAM OF EXPERIMENTAL OPHTHALMOLOGY AND GLAUCOMA RESEARCH/PARACELSUS MEDICAL UNIVERSITY SALZBURG; FUCHS FOUNDATION; ADELE RABENSTEINER FOUNDATION	THIS RESEARCH WAS SUPPORTED BY THE RESEARCH PROGRAM OF EXPERIMENTAL OPHTHALMOLOGY AND GLAUCOMA RESEARCH/PARACELSUS MEDICAL UNIVERSITY SALZBURG, FUCHS FOUNDATION, AND ADELE RABENSTEINER FOUNDATION. HR IS CONSULTANT TO ALLERGAN PLC.	HM7DQ	TRABECULECTOMY; SURGERY	2	ACTA OPHTHALMOL	ACTA OPHTHALMOL.	ENGLISH	23	HYBRID, GREEN PUBLISHED	HITZL, WOLFGANG/0000-0002-7696-1479; STROHMAIER, CLEMENS/0000-0001-8249-1138	111 RIVER ST, HOBOKEN 07030-5774, NJ USA	MAR	7	HOBOKEN	30160048	J	WILEY	2019		LENZHOFER, M (CORRESPONDING AUTHOR), PARACELSUS MED UNIV, DEPT OPHTHALMOL & OPTOMETRY, MUELLNER HAUPTSTASSE 48, A-5020 SALZBURG, AUSTRIA.	OPHTHALMOLOGY			1755-375X	ACTA OPHTHALMOLOGICA
LIN SG;HU Y;YE C;CONGDON N;YOU RR;LIU SS;LIU C;LV F;ZHANG SD	LIN, SIGENG;HU, YING;YE, CONG;CONGDON, NATHAN;YOU, RUIRONG;LIU, SHANSHAN;LIU, CHI;LV, FAN;ZHANG, SHAODAN	ANDREATTA W, 2015, BMC OPHTHALMOL, V15, DOI 10.1186/S12886-015-0100-5;BASKARAN M, 2007, OPHTHALMOLOGY, V114, P501, DOI 10.1016/J.OPHTHA.2006.08.019;DAI YY, 2020, EYE VISION, V7, DOI 10.1186/S40662-020-00196-1;DESMOND T, 2022, GRAEF ARCH CLIN EXP, V260, P1, DOI 10.1007/S00417-021-05271-4;FOSTER PJ, 2002, BRIT J OPHTHALMOL, V86, P238, DOI 10.1136/BJO.86.2.238;GOUWS P, 2020, EYE, V34, P1956, DOI 10.…	BACKGROUNDTHE MAIN BARRIERS KEEPING INDIVIDUALS WITH HIGH-RISK OF ANGLE CLOSURE FROM SEEKING EYE-CARE SERVICE ARE THE ABSENCE OF BOTH DISEASE AWARENESS AND CONVENIENT AND LOW-COST ACCESS TO THE OCULAR HEALTH CARE SYSTEM. PRESENT STUDY DESCRIBED THE EFFICACY OF A HEALTH EXAMINATION CENTER-BASED SCREENING MODEL DESIGNED TO DETECT EYES WITH HIGH RISK OF ANGLE CLOSURE (HRAC) AMONG HEALTHY INDIVIDUALS…	513				WENZHOU MED UNIV, EYE HOSP, SCH OPHTHALMOL & OPTOMETRY, 270 XUEYUANXI ST, WENZHOU 325027, ZHEJIANG, PEOPLES R CHINA.; WENZHOU MED UNIV, GLAUCOMA RES INST, WENZHOU, PEOPLES R CHINA.; NATL CLIN RES CTR OCULAR DIS, WENZHOU, PEOPLES R CHINA.; FORTH PEOPLES HOSP SHENYANG, DEPT OPHTHALMOL, 20 HUANGHENAN ST, SHENYANG 110031, LIAONING, PEOPLES R CHINA.; QUEENS UNIV BELFAST, CTR PUBL HLTH, BELFAST, NORTH …	WENZHOU MEDICAL UNIVERSITY; WENZHOU MEDICAL UNIVERSITY; QUEENS UNIVERSITY BELFAST; SUN YAT SEN UNIVERSITY					2024-02-18	NARROW ANGLE; SCREENING; ANTERIOR SEGMENT OCT; HEALTH EXAMINATION CENTER	10.1186/s12886-022-02739-7	ARTICLE			1471-2415	LIUCHI812@126.COM			NATIONAL KEY R&D PROGRAM OF CHINA; BASIC SCIENTIFIC RESEARCH PROGRAM OF WENZHOU [2020YFC2008200]; KEY INNOVATION AND GUIDANCE PROGRAM OF THE EYE HOSPITAL, SCHOOL OF OPHTHALMOLOGY & OPTOMETRY, WENZHOU MEDICAL UNIVERSITY [Y20190695]; SCIENTIFIC RESEARCH FOUNDATION OF THE EYE HOSPITAL, SCHOOL OF OPHTHALMOLOGY & OPTOMETRY, WENZHOU MEDICAL UNIVERSITY [YNZD2201903]; [KYQD20180306]	THIS WORK WAS SUPPORTED BY THE NATIONAL KEY R & D PROGRAM OF CHINA (2020YFC2008200), THE BASIC SCIENTIFIC RESEARCH PROGRAM OF WENZHOU (Y20190695), THE KEY INNOVATION AND GUIDANCE PROGRAM OF THE EYE HOSPITAL, SCHOOL OF OPHTHALMOLOGY & OPTOMETRY, WENZHOU MEDICAL UNIVERSITY (YNZD2201903), AND THE SCIENTIFIC RESEARCH FOUNDATION OF THE EYE HOSPITAL, SCHOOL OF OPHTHALMOLOGY & OPTOMETRY, WENZHOU MEDICAL…	7L0JG	OPTICAL COHERENCE TOMOGRAPHY; ADULT CHINESE; CHAMBER ANGLE; NARROW ANGLES; POPULATION; PREVALENCE; GLAUCOMA; GONIOSCOPY	1	BMC OPHTHALMOL	BMC OPHTHALMOL.	ENGLISH	35	GREEN PUBLISHED, GOLD	CONGDON, NATHAN/0000-0001-9866-3416	CAMPUS, 4 CRINAN ST, LONDON N1 9XW, ENGLAND	DEC 28	8	LONDON	36577987	J	BMC	2022	ZHANG, SHAODAN/HTO-5473-2023	LIU, C (CORRESPONDING AUTHOR), FORTH PEOPLES HOSP SHENYANG, DEPT OPHTHALMOL, 20 HUANGHENAN ST, SHENYANG 110031, LIAONING, PEOPLES R CHINA.	OPHTHALMOLOGY				BMC OPHTHALMOLOGY
ESLAMI Y;LATIFI G;MOGHIMI S;GHAFFARI R;FAKHRAIE G;ZAREI R;JABBARVAND M;MOHAMMADI M;LIN S	ESLAMI, YADOLLAH;LATIFI, GOLSHAN;MOGHIMI, SASAN;GHAFFARI, REZA;FAKHRAIE, GHASEM;ZAREI, REZA;JABBARVAND, MAHMOOD;MOHAMMADI, MASSOOD;LIN, SHAN	CASSON RJ, 2007, BRIT J OPHTHALMOL, V91, P856, DOI 10.1136/BJO.2006.108688;DADA T, 2007, J CATARACT REFR SURG, V33, P837, DOI 10.1016/J.JCRS.2007.01.021;DAWCZYNSKI J, 2007, EUR J OPHTHALMOL, V17, P363, DOI 10.1177/112067210701700314;FAKHRAIE G, 2012, EUR J OPHTHALMOL, V22, P714, DOI 10.5301/EJO.5000101;FOSTER PAUL J, 2002, SEMIN OPHTHALMOL, V17, P50;FRIEDMAN DS, 2003, ARCH OPHTHALMOL-CHIC, V121, …	BACKGROUND TO COMPARE THE ANATOMIC EFFECTS OF PHACOEMULSIFICATION (PHACO) VERSUS COMBINED PHACOEMULSIFICATION AND VISCOGONIOPLASTY (PHACO-VGP) ON DRAINAGE ANGLE STATUS IN PRIMARY ANGLE-CLOSURE GLAUCOMA (PACG) USING ANTERIOR SEGMENT OPTICAL COHERENCE TOMOGRAPHY (AS-OCT). DESIGN PROSPECTIVE, RANDOMIZED CLINICAL TRIAL. PARTICIPANTS SIXTY-SEVEN EYES OF 57 PATIENTS WITH THE DIAGNOSIS OF PACG. METHOD P…				368	UNIV TEHRAN MED SCI, FARABI EYE RES CTR, TEHRAN, IRAN.; UNIV CALIF SAN FRANCISCO, SCH MED, DEPT OPHTHALMOL, SAN FRANCISCO, CA USA.;	TEHRAN UNIVERSITY OF MEDICAL SCIENCES; UNIVERSITY OF CALIFORNIA SYSTEM; UNIVERSITY OF CALIFORNIA SAN FRANCISCO					2024-02-18	ANTERIOR CHAMBER DEPTH; ANTERIOR SEGMENT OPTICAL COHERENCE TOMOGRAPHY; PHACOEMULSIFICATION; PRIMARY ANGLE CLOSURE GLAUCOMA; VISCOGONIOPLASTY	10.1111/j.1442-9071.2012.02871.x	ARTICLE			1442-9071	SASANIMII@YAHOO.COM	378				159GD	ANTERIOR-CHAMBER ANGLE; OPTICAL COHERENCE TOMOGRAPHY; INTRAOCULAR-LENS IMPLANTATION; CLOSURE GLAUCOMA; COMBINED PHACOEMULSIFICATION; COMBINED PHACOTRABECULECTOMY; ULTRASOUND BIOMICROSCOPY; SEGMENT; EYES; PRESSURE	4	CLIN EXP OPHTHALMOL	CLIN. EXP. OPHTHALMOL.	ENGLISH	51		LATIFI, GOLSHAN/0000-0003-3060-772X; MOHAMMADI, MASSOOD/0000-0002-3017-6643;	111 RIVER ST, HOBOKEN 07030-5774, NJ USA	MAY-JUN	11	HOBOKEN	22958160	J	WILEY	2013	LATIFI, GOLSHAN/ABE-4270-2020; MOHAMMADI, MASSOOD/ABG-2563-2020; ZAREI, REZA/GRF-6080-2022	MOGHIMI, S (CORRESPONDING AUTHOR), UNIV TEHRAN MED SCI, FARABI EYE RES CTR, TEHRAN, IRAN.	OPHTHALMOLOGY			1442-6404	CLINICAL AND EXPERIMENTAL OPHTHALMOLOGY
LUO ZHK;JACOBS DS	LUO, ZHONGHUI K.;JACOBS, DEBORAH S.	CHOMA MA, 2005, J BIOMED OPT, V10, DOI 10.1117/1.1961474;DE BOER JF, 2003, OPT LETT, V28, P2067, DOI 10.1364/OL.28.002067;DREXLER W, 2008, PROG RETIN EYE RES, V27, P45, DOI 10.1016/J.PRETEYERES.2007.07.005;ERIE JC, 2009, AM J OPHTHALMOL, V148, P639, DOI 10.1016/J.AJO.2009.06.022;FERCHER AF, 1988, OPT LETT, V13, P186, DOI 10.1364/OL.13.000186;GEITZENAUER W, 2011, BRIT J OPHTHALMOL, V95, P171, DOI …	OPTICAL COHERENCE TOMOGRAPHY (OCT) IS A NON-INVASIVE, HIGH-RESOLUTION AND HIGH-SPEED IMAGING MODALITY THAT HAS ENJOYED RAPID GROWTH IN OPHTHALMOLOGY SINCE ITS DEVELOPMENT 20 YEARS AGO. CONTACT LENS FITTING IS TRADITIONALLY BASED ON TRIAL LENSES, WHICH IS EXPENSIVE AND TIME-CONSUMING. MODERN ANTERIOR SEGMENT OCT IS CAPABLE OF GENERATING THREE-DIMENSIONAL OCULAR SURFACE MAPS OF THE CORNEA AND SCLER…				133	BOSTON FDN SIGHT, NEEDHAM, MA 02494 USA.; HARVARD UNIV, MASSACHUSETTS EYE & EAR INFIRM, SCH MED, BOSTON, MA USA.;	HARVARD UNIVERSITY; HARVARD MEDICAL SCHOOL; MASSACHUSETTS EYE & EAR INFIRMARY					2024-02-18	ANTERIOR SEGMENT OCT; TOPOGRAPHY; SCLERAL LENS; CONTACT LENS; OCULAR SURFACE	10.3109/08820538.2012.708814	REVIEW			1744-5205	DJACOBS@BOSTONSIGHT.ORG	137				041SD	DOMAIN MODE-LOCKING; VERSUS-HOST-DISEASE; BOSTON SCLERAL LENS; SWEPT SOURCE OCT; CORNEAL TOPOGRAPHY; IN-VIVO; LASER; EYE; GLAUCOMA; REFLECTOMETRY	5-6	SEMIN OPHTHALMOL	SEMIN. OPHTHALMOL.	ENGLISH	59		JACOBS, DEBORAH/0000-0002-8587-1184	530 WALNUT STREET, STE 850, PHILADELPHIA, PA 19106 USA	SEP-NOV	5	PHILADELPHIA	23163267	J	TAYLOR & FRANCIS INC	2012	LUO, ZHONGHUI/HIZ-9370-2022	JACOBS, DS (CORRESPONDING AUTHOR), BOSTON FDN SIGHT, 464 HILLSIDE AVE,SUITE 205, NEEDHAM, MA 02494 USA.	OPHTHALMOLOGY			0882-0538	SEMINARS IN OPHTHALMOLOGY
CARNEVALE C;RIVA I;ROBERTI G;MICHELESSI M;TANGA L;VERCELLIN ACV;AGNIFILI L;MANNI G;HARRIS A;QUARANTA L;ODDONE F	CARNEVALE, CARMELA;RIVA, IVANO;ROBERTI, GLORIA;MICHELESSI, MANUELE;TANGA, LUCIA;VERCELLIN, ALICE C. VERTICCHIO;AGNIFILI, LUCA;MANNI, GIANLUCA;HARRIS, ALON;QUARANTA, LUCIANO;ODDONE, FRANCESCO	AGNIFILI L, 2020, J GLAUCOMA, V29, P374, DOI 10.1097/IJG.0000000000001469;AGNIFILI L, 2019, SCI REP-UK, V9, DOI 10.1038/S41598-019-47823-Z;AGNIFILI L, 2018, J GLAUCOMA, V27, P364, DOI 10.1097/IJG.0000000000000899;AGNIFILI L, 2016, INVEST OPHTH VIS SCI, V57, P2928, DOI 10.1167/IOVS.16-19257;AGNIFILI L, 2014, INVEST OPHTH VIS SCI, V55, P5254, DOI 10.1167/IOVS.14-14365;AGNIFILI L, 2013, BRIT J OPHTH…	GLAUCOMA PATIENTS OFTEN SUFFER FROM OCULAR SURFACE DISEASE (OSD) CAUSED BY THE CHRONIC ADMINISTRATION OF TOPICAL ANTI-GLAUCOMA MEDICATIONS, ESPECIALLY IN CASES OF LONG-TERM THERAPY WITH PRESERVED OR MULTIPLE DRUGS. ADDITIONALLY, GLAUCOMA SURGERY MAY DETERMINE OCULAR SURFACE CHANGES RELATED TO THE FORMATION AND LOCATION OF THE FILTERING BLEB, THE APPLICATION OF ANTI-MITOTIC AGENTS, AND THE POST-OP…	581				IRCCS FDN BIETTI, VIA LIVENZA 3, I-00198 ROME, ITALY.; UNIV PAVIA, DEPT SURG & CLIN DIAGNOST & PEDIAT SCI, SECT OPHTHALMOL, IRCCS FDN POLICLIN SAN MATTEO, I-27100 PAVIA, ITALY.; MT SINAI HOSP, DEPT OPHTHALMOL, ICAHN SCH MED, NEW YORK, NY 10029 USA.; UNIV G DANNUNZIO, DEPT MED & AGING SCI, OPHTHALMOL CLIN, I-66100 CHIETI, ITALY.; UNIV ROMA TOR VERGATA, DEPT CLIN SCI & TRANSLAT MED, VIALE OXFORD 81…	IRCCS - FONDAZIONE "G.B. BIETTI" PER LO STUDIO E LA RICERCA IN OFTALMOLOGIA; IRCCS FONDAZIONE SAN MATTEO; UNIVERSITY OF PAVIA; ICAHN SCHOOL OF MEDICINE AT MOUNT SINAI; G D'ANNUNZIO UNIVERSITY OF CHIETI-PESCARA; UNIVERSITY OF ROME TOR VERGATA					2024-02-18	GLAUCOMA; OCULAR SURFACE; MEDICAL TREATMENT; SURGICAL TREATMENT; IN VIVO CONFOCAL MICROSCOPY; ANTERIOR SEGMENT OPTICAL COHERENCE TOMOGRAPHY	10.3390/ph14060581	REVIEW			1424-8247	CARMELA.CARNEVALE@FONDAZIONEBIETTI.IT; IVANO.RIVA@VIRGILIO.IT; GLORIA.ROBERTI@FONDAZIONEBIETTI.IT; MANUELE.MICHELESSI@FONDAZIONEBIETTI.IT; LUCIA.TANGA@FONDAZIONEBIETTI.IT; ALICE.VERTICCHIO@GMAIL.COM; L.AGNIFILI@UNICH.IT; GIANLUCAMANNI53@GMAIL.COM; PALONHARRIS@GMAIL.COM; LUCIANO.QUARANTA@UNIPV.IT; ODD1FR@GMAIL.COM			NIH [R01EY030851]; NSF DMS [1853222/2021192]; RESEARCH TO PREVENT BLINDNESS, NY	THIS WORK RECEIVED NO EXTERNAL FUNDING. A.H. IS SUPPORTED BY NIH GRANT (R01EY030851), NSF DMS (1853222/2021192), AND IN PART BY A CHALLENGE GRANT AWARD FROM RESEARCH TO PREVENT BLINDNESS, NY.	SZ3ND	OPEN-ANGLE GLAUCOMA; PRESERVATIVE-FREE TAFLUPROST; FILTERING BLEBS; FILTRATION SURGERY; DRY EYE; CONJUNCTIVAL MODIFICATIONS; TRABECULECTOMY BLEBS; INFLAMMATORY MARKERS; LYMPHOID-TISSUE; VIVO	6	PHARMACEUTICALS-BASE	PHARMACEUTICALS	ENGLISH	116	GOLD, GREEN PUBLISHED	ODDONE, FRANCESCO/0000-0002-2504-0004; CARNEVALE, CARMELA/0000-0003-0966-6311; AGNIFILI, LUCA/0000-0002-1625-6305; QUARANTA, LUCIANO/0000-0002-5462-1713; RIVA, IVANO/0000-0002-7397-2260	ST ALBAN-ANLAGE 66, CH-4052 BASEL, SWITZERLAND	JUN	26	BASEL	34207162	J	MDPI	2021	AGNIFILI, LUCA/AAC-6345-2022; QUARANTA, LUCIANO/F-8922-2011; ODDONE, FRANCESCO/K-8876-2016; RIVA, IVANO/B-9860-2019	ODDONE, F (CORRESPONDING AUTHOR), IRCCS FDN BIETTI, VIA LIVENZA 3, I-00198 ROME, ITALY.	PHARMACOLOGY & PHARMACY				PHARMACEUTICALS
SHOKOOHI-RAD S;KARIMI F;ZAREI-GHANAVATI S;TIREH H	SHOKOOHI-RAD, SAEED;KARIMI, FARSHID;ZAREI-GHANAVATI, SIAMAK;TIREH, HOSSEIN	BUYS YM, 2008, OPHTHALMOLOGY, V115, P1130, DOI 10.1016/J.OPHTHA.2007.09.007;CHEN PP, 2015, OPHTHALMOLOGY, V122, P1294, DOI 10.1016/J.OPHTHA.2015.03.021;COGAN D G, 1951, TRANS AM ACAD OPHTHALMOL OTOLARYNGOL, V55, P329;CUMBA RJ, 2012, J OPHTHALMOL, V2012, DOI 10.1155/2012/487309;DELMONTE DW, 2011, J CATARACT REFR SURG, V37, P588, DOI 10.1016/J.JCRS.2010.12.037;DENG BL, 2011, INT J OPHTHALMOL-CHI, V…	OBJECTIVE: THE AIM OF THIS STUDY WAS TO EVALUATE THE EFFECTS OF GONIOTOMY ON PATIENTS WITH PRIMARY ANGLE-CLOSURE GLAUCOMA WHO UNDERWENT "PHACOEMULSIFICATION AND VISCO-GONIOSYNECHIALYSIS." MATERIALS AND METHODS: THIS PROSPECTIVE RANDOMIZED CLINICAL TRIAL WAS CARRIED OUT ON 63 EYES OF 61 PATIENTS (48-85 YEARS) WITH PRIMARY ANGLE-CLOSURE GLAUCOMA WHO WERE ENROLLED. THE SUBJECTS WERE RANDOMLY ASSIGNE…	1120672119879331			88	MASHHAD UNIV MED SCI, EYE RES CTR, DEPT OPHTHALMOL, MASHHAD, RAZAVI KHORASAN, IRAN.; MASHHAD UNIV MED SCI, DEPT OPTOMETRY, MASHHAD, RAZAVI KHORASAN, IRAN.; MASHHAD UNIV MED SCI, DEPT EPIDEMIOL & BIOSTAT, MASHHAD, RAZAVI KHORASAN, IRAN.;	MASHHAD UNIVERSITY MEDICAL SCIENCE; MASHHAD UNIVERSITY MEDICAL SCIENCE; MASHHAD UNIVERSITY MEDICAL SCIENCE					2024-02-18	GLAUCOMA; PHACOEMULSIFICATION; MASHHAD	10.1177/1120672119879331	ARTICLE; EARLY ACCESS	OCT 2019		1724-6016	KARIMI.FARSHIDOM24@GMAIL.COM	95				QC0TA	OPTICAL COHERENCE TOMOGRAPHY; INTRAOCULAR-PRESSURE; VISCOGONIOPLASTY; PHACOTRABECULECTOMY; TRABECULECTOMY; ASSOCIATION; CATARACT; ADULT; WIDTH; EYES	1	EUR J OPHTHALMOL	EUR. J. OPHTHALMOL.	ENGLISH	42			1 OLIVERS YARD, 55 CITY ROAD, LONDON EC1Y 1SP, ENGLAND	2021 JAN	8	LONDON	31578887	J	SAGE PUBLICATIONS LTD	2021		KARIMI, F (CORRESPONDING AUTHOR), MASHHAD UNIV MED SCI, DEPT OPTOMETRY, MASHHAD, RAZAVI KHORASAN, IRAN.	OPHTHALMOLOGY			1120-6721	EUROPEAN JOURNAL OF OPHTHALMOLOGY
MAHMOUD MSED;MOHAMED AA;ZEIN HA	MAHMOUD, MOHAMED SALAH EL-DIN;MOHAMED, ASMAA ANWAR;ZEIN, HOSNY AHMED	BIANCHI G R, 2020, CESK SLOV OFTALMOL, V76, P211, DOI 10.31348/2020/30;BIANCHI GERMAN ROBERTO, 2019, MED HYPOTHESIS DISCOV INNOV OPHTHALMOL, V8, P57;COSKUNSEVEN EFEKAN, 2017, J REFRACT SURG, V33, P604, DOI 10.3928/1081597X-20170504-06;FERNANDES P, 2011, J REFRACT SURG, V27, P765, DOI 10.3928/1081597X-20110617-01;GARGALLO-MARTINEZ B, 2020, SCI REP-UK, V10, DOI 10.1038/S41598-020-66146-Y;GREWAL DS,…	PURPOSE TO EVALUATE THE CHANGES IN THE ANGLE OF THE AC AND LENS VAULT AFTER IPCL IMPLANTATION BY AS-OCT IN MYOPIC PATIENTS. METHODS THIS WAS A PROSPECTIVE OBSERVATIONAL STUDY INVOLVING 30 MYOPIC EYES IMPLANTED WITH IPCL. AS-OCT WAS USED TO EVALUATE LENS VAULT AND AC ANGLE PARAMETERS INCLUDING ANTERIOR CHAMBER ANGLE, ANGLE OPENING DISTANCE AND TRABECULAR-IRIS SPACE AREA (TISA) AT 1, 3 AND 6 MONTHS…				2449	MINIA UNIV, FAC MED, OPHTHALMOL DEPT, AL MINYA, EGYPT.;	EGYPTIAN KNOWLEDGE BANK (EKB); MINIA UNIVERSITY					2024-02-18	ANTERIOR CHAMBER (AC) ANGLE; ANTERIOR SEGMENT OPTICAL COHERENCE TOMOGRAPHY (AS-OCT); IMPLANTABLE PHAKIC CONTACT LENS (IPCL)	10.1007/s10792-022-02244-2	ARTICLE; EARLY ACCESS	MAR 2022		1573-2630	MOHAMED_ZAKI@MU.EDU.EG	2457		SCIENCE, TECHNOLOGY & INNOVATION FUNDING AUTHORITY (STDF); EGYPTIAN KNOWLEDGE BANK (EKB)	OPEN ACCESS FUNDING PROVIDED BY THE SCIENCE, TECHNOLOGY & INNOVATION FUNDING AUTHORITY (STDF) IN COOPERATION WITH THE EGYPTIAN KNOWLEDGE BANK (EKB). THE AUTHORS DID NOT RECEIVE SUPPORT FROM ANY ORGANIZATION FOR THE SUBMITTED WORK.	3E4YE	INTRAOCULAR LENSES; COLLAMER LENS; SAFETY	8	INT OPHTHALMOL	INT. OPHTHALMOL.	ENGLISH	17	HYBRID, GREEN PUBLISHED, GREEN SUBMITTED	ZEIN, HOSNY/0000-0002-2519-0977; ELDIASTY, ASMAA/0000-0002-9799-3525; SALAH EL-DIN MAHMOUD, MOHAMED/0000-0003-4537-2177; ANWAR MOHAMED, ASMAA/0000-0002-4351-8534	VAN GODEWIJCKSTRAAT 30, 3311 GZ DORDRECHT, NETHERLANDS	2022 AUG	9	DORDRECHT	35243558	J	SPRINGER	2022	ZEIN, HOSNY/GRE-9603-2022; ELDIASTY, ASMAA/IXD-5924-2023	MAHMOUD, MSED (CORRESPONDING AUTHOR), MINIA UNIV, FAC MED, OPHTHALMOL DEPT, AL MINYA, EGYPT.	OPHTHALMOLOGY			0165-5701	INTERNATIONAL OPHTHALMOLOGY
TAY ELT;YONG VKY;LIM BA;SIA S;WONG EPY;YIP LWL	TAY, ELTON LIK TONG;YONG, VERNON KHET YAU;LIM, BOON ANG;SIA, STELSON;WONG, ELIZABETH POH YING;YIP, LEONARD WEI LEON	BASKARAN M, 2007, OPHTHALMOLOGY, V114, P501, DOI 10.1016/J.OPHTHA.2006.08.019;CHEUNG CY, 2011, BRIT J OPHTHALMOL, V95, P955, DOI 10.1136/BJO.2010.189217;FOSTER PAUL J, 2002, SEMIN OPHTHALMOL, V17, P50;IZATT JA, 1994, ARCH OPHTHALMOL-CHIC, V112, P1584, DOI 10.1001/ARCHOPHT.1994.01090240090031;LEUNG CKS, 2011, EYE, V25, P261, DOI 10.1038/EYE.2010.201;NOLAN WP, 2007, OPHTHALMOLOGY, V114, P33, DOI 10…	AIM: TO DETERMINE ANGLE CLOSURE AGREEMENTS BETWEEN GONIOSCOPY AND ANTERIOR SEGMENT OPTICAL COHERENCE TOMOGRAPHY (AS -OCT), AS WELL AS GONIOSCOPY AND SPECTRAL DOMAIN OCT (SD-OCT). A SECONDARY OBJECTIVE WAS TO QUANTIFY INTER-OBSERVER AGREEMENTS OF AS -OCT AND SD-OCT ASSESSMENTS. METHODS: SEVENTEEN CONSECUTIVE SUBJECTS (33 EYES) WERE RECRUITED FROM THE STUDY HOSPITAL'S GLAUCOMA CLINIC. GONIOSCOPY WA…				342	TAN TOCK SENG HOSP, DEPT OPHTHALMOL, SINGAPORE 308433, SINGAPORE.; REPUBL SINGAPORE AIR FORCE AEROMED CTR, SINGAPORE 539945, SINGAPORE.; CARDINAL SANTOS MED CTR, SAN JUAN 1502, METRO MANILA, PHILIPPINES.;	TAN TOCK SENG HOSPITAL					2024-02-18	ANTERIOR SEGMENT IMAGING; SPECTRAL DOMAIN IMAGING; ANGLE CLOSURE ASSESSMENT	10.3980/j.issn.2222-3959.2015.02.23	ARTICLE			2227-4898	ELTONTAYLT@HOTMAIL.COM	346				CF7RN	CHAMBER ANGLE; ASSOCIATION; SYSTEM; WIDTH; EYE	2	INT J OPHTHALMOL-CHI	INT. J. OPHTHALMOL.	ENGLISH	21		YIP, LEONARD WL/0000-0002-7306-5126; WONG, ELIZABETH/0000-0001-5288-0546	NO 269 YOUYI EAST RD, XI AN, 710054, PEOPLES R CHINA	APR 18	5	XI AN	25938053	J	IJO PRESS	2015	YIP, LEONARD WL/F-6362-2017	TAY, ELT (CORRESPONDING AUTHOR), TAN TOCK SENG HOSP, DEPT OPHTHALMOL, 11 JALAN TAN TOCK SENG, SINGAPORE 308433, SINGAPORE.	OPHTHALMOLOGY			2222-3959	INTERNATIONAL JOURNAL OF OPHTHALMOLOGY
SCOTTO R;BAGNIS A;PAPADIA M;CUTOLO CA;RISSO D;TRAVERSO CE	SCOTTO, RICCARDO;BAGNIS, ALESSANDRO;PAPADIA, MARINA;CUTOLO, CARLO ALBERTO;RISSO, DOMENICO;TRAVERSO, CARLO ENRICO	ALMUBRAD TM, 2011, CLIN OPHTHALMOL, V5, P871, DOI 10.2147/OPTH.S21247;ASHWIN PT, 2010, BRIT J OPHTHALMOL, V94, P965, DOI 10.1136/BJO.2009.164228;BAO FJ, 2014, CORNEA, V33, P576, DOI 10.1097/ICO.0000000000000113;BECHMANN M, 2000, BRIT J OPHTHALMOL, V84, P1233, DOI 10.1136/BJO.84.11.1233;BLAND JM, 1986, LANCET, V1, P307, DOI 10.1016/S0140-6736(86)90837-8;BOVELLE R, 1999, ARCH OPHTHALMOL-CHIC, V117,…	PURPOSE: TO EVALUATE AND COMPARE CENTRAL CORNEAL THICKNESS (CCT) VALUES MEASURED WITH ANTERIOR SEGMENT OPTICAL COHERENCE TOMOGRAPHY (AS-OCT), NONCONTACT SPECULAR MICROSCOPY (NCSM), AND ULTRASOUND PACHYMETRY (USP). MATERIALS AND METHODS: CCT WAS MEASURED IN 182 HEALTHY EYES WITHOUT OCULAR ABNORMALITIES OTHER THAN REFRACTIVE ERRORS. THREE CONSECUTIVE MEASUREMENTS OF CCT BY THE SAME EXAMINER WERE OB…				860	UNIV GENOA, S MARTINO HOSP, EYE CLIN, DEPT NEUROSCI REHABIL OPHTHALMOL GENET MATERNAL &, GENOA, ITALY.; UNIV GENOA, S MARTINO HOSP, DEPT HLTH SCI DISSAL, GENOA, ITALY.;	UNIVERSITY OF GENOA; IRCCS AOU SAN MARTINO IST; UNIVERSITY OF GENOA; IRCCS AOU SAN MARTINO IST					2024-02-18	CENTRAL CORNEAL THICKNESS; ANTERIOR SEGMENT OCT; ULTRASOUND PACHYMETRY; NONCONTACT SPECULAR MICROSCOPY	10.1097/IJG.0000000000000745	ARTICLE			1536-481X	ALEBAGNIS@LIBERO.IT	865				FP0MM	OPTICAL COHERENCE TOMOGRAPHY; ROTATING SCHEIMPFLUG CAMERA; OPEN-ANGLE GLAUCOMA; DEVICES; PRECISION; ORBSCAN	10	J GLAUCOMA	J. GLAUCOMA	ENGLISH	33		CUTOLO, CARLO A/0000-0002-2433-0704	TWO COMMERCE SQ, 2001 MARKET ST, PHILADELPHIA, PA 19103 USA	OCT	6	PHILADELPHIA	28834824	J	LIPPINCOTT WILLIAMS & WILKINS	2017	CUTOLO, CARLO A/B-7467-2017	BAGNIS, A (CORRESPONDING AUTHOR), UNIV GENOA, DEPT NEUROSCI REHABIL OPHTHALMOL GENET MATERNAL &, CLIN OCULIST, OSPED POLICLIN SAN MARTINO, VIALE BENEDETTO 15 5, I-16132 GENOA, ITALY.	OPHTHALMOLOGY			1057-0829	JOURNAL OF GLAUCOMA
LIM SH	LIM, SU-HO	AHN SJ, 2013, CORNEA, V32, P971, DOI 10.1097/ICO.0B013E31828344C9;ALKABES M, 2011, INVEST OPHTH VIS SCI, V52, P8349, DOI 10.1167/IOVS.11-8043;BIANCIOTTO C, 2011, OPHTHALMOLOGY, V118, P1297, DOI 10.1016/J.OPHTHA.2010.11.011;BUJAK MC, 2011, OPHTHAL SURG LAS IM, V42, P308, DOI 10.3928/15428877-20110603-02;CAN I, 2011, J CATARACT REFR SURG, V37, P490, DOI 10.1016/J.JCRS.2010.09.024;CHEUNG CYL, 2010, …	ANTERIOR SEGMENT OPTICAL COHERENCE TOMOGRAPHY (AS-OCT) WAS RECENTLY DEVELOPED AND HAS BECOME A CRUCIAL TOOL IN CLINICAL PRACTICE. AS-OCT IS A NONCONTACT IMAGING DEVICE THAT PROVIDES THE DETAILED STRUCTURE OF THE ANTERIOR PART OF THE EYES. IN THIS REVIEW, THE AUTHOR WILL DISCUSS THE VARIOUS CLINICAL APPLICATIONS OF AS-OCT, SUCH AS THE NORMAL FINDINGS, TEAR MENISCUS MEASUREMENT, OCULAR SURFACE DISE…	605729				YEUNGNAM UNIV, COLL MED, DEPT OPHTHALMOL, DAEGU, SOUTH KOREA.; DAEGU VET HLTH SERV MED CTR, DEPT OPHTHALMOL, DAEGU 704802, SOUTH KOREA.;	YEUNGNAM UNIVERSITY					2024-02-18		10.1155/2015/605729	REVIEW			2090-0058	MDSHLIM@GMAIL.COM					CD9BG	GRANULAR CORNEAL-DYSTROPHY; TEAR MENISCUS; FEMTOSECOND LASER; CONFOCAL MICROSCOPY; LASIK FLAP; IN-VIVO; AS-OCT; GRAFT; BLEBS; KERATOCONUS		J OPHTHALMOL	J. OPHTHALMOL.	ENGLISH	70	GOLD, GREEN PUBLISHED, GREEN SUBMITTED	LIM, SU-HO/0000-0003-3807-4163	ADAM HOUSE, 3RD FLR, 1 FITZROY SQ, LONDON, W1T 5HF, ENGLAND		12	LONDON	25821589	J	HINDAWI LTD	2015	LIM, SU-HO/AAE-4344-2019	LIM, SH (CORRESPONDING AUTHOR), YEUNGNAM UNIV, COLL MED, DEPT OPHTHALMOL, DAEGU, SOUTH KOREA.	OPHTHALMOLOGY			2090-004X	JOURNAL OF OPHTHALMOLOGY
MENDRINOS E;DOSSO A;SOMMERHALDER J;SHAARAWY T	MENDRINOS, E.;DOSSO, A.;SOMMERHALDER, J.;SHAARAWY, T.	AL-TORBAK A, 2003, CORNEA, V22, P194, DOI 10.1097/00003226-200304000-00002;ALANKO HI, 1986, ACTA OPHTHALMOL, V64, P623;ARNAVIELLE S, 2007, J GLAUCOMA, V16, P324, DOI 10.1097/IJG.0B013E3180391A04;BENETZ BAM, 1999, CORNEA, V18, P67;BHATIA LINI S., 2004, INTERNATIONAL OPHTHALMOLOGY CLINICS, V44, P123, DOI 10.1097/00004397-200404410-00014;BIGAR F, 1982, OPHTHALMOLOGY, V89, P596;BÖHNKE M, 1999, PROG R…	AIMS TO REPORT CORNEAL ENDOTHELIAL CELL LOSS AND IN VIVO VISUALIZATION OF THE AHMED GLAUCOMA VALVE IMPLANT IN EYES WITH REFRACTORY GLAUCOMA. METHODS TEN EYES UNDERWENT AHMED VALVE IMPLANT SURGERY AND WERE FOLLOWED-UP FOR 12 MONTHS. DATA COLLECTED INCLUDED INTRAOCULAR PRESSURE (IOP), NUMBER OF ANTIGLAUCOMA MEDICATIONS AND SURGERY-RELATED COMPLICATIONS. AT 6 AND 12 MONTHS POSTOPERATIVELY, THE INTRA…				1836	UNIV HOSP GENEVA, DEPT OPHTHALMOL, CH-1211 GENEVA 14, SWITZERLAND.;	UNIVERSITY OF GENEVA		SINGAPORE, SINGAPORE	2ND WORLD GLAUCOMA CONGRESS	JUL 18-21, 2007	2024-02-18	AHMED VALVE; CORNEAL ENDOTHELIAL CELL LOSS; ANTERIOR SEGMENT OCT; IN VIVO CONFOCAL MICROSCOPY	10.1038/eye.2008.321	ARTICLE; PROCEEDINGS PAPER			1476-5454	TAREK.SHAARAWY@HCUGE.CH	1844				492VX	OPTICAL COHERENCE TOMOGRAPHY; ANGLE-CLOSURE GLAUCOMA; FLUID-BASED SYSTEM; CONFOCAL MICROSCOPY; ANTERIOR SEGMENT; PENETRATING KERATOPLASTY; ULTRASOUND BIOMICROSCOPY; SPECULAR MICROSCOPES; CATARACT-SURGERY; IMAGE-ANALYSIS	9	EYE	EYE	ENGLISH	44	BRONZE, GREEN PUBLISHED		MACMILLAN BUILDING, 4 CRINAN ST, LONDON N1 9XW, ENGLAND	SEP	9	LONDON	18949003	J	NATURE PUBLISHING GROUP	2009		SHAARAWY, T (CORRESPONDING AUTHOR), UNIV HOSP GENEVA, DEPT OPHTHALMOL, 22 RUE ALCIDE JENTZER, CH-1211 GENEVA 14, SWITZERLAND.	OPHTHALMOLOGY			0950-222X	EYE
GOZAWA M;TAKAMURA Y;IWASAKI K;ARIMURA S;INATANI M	GOZAWA, MAKOTO;TAKAMURA, YOSHIHIRO;IWASAKI, KENTARO;ARIMURA, SHOGO;INATANI, MASARU	BENGTSSON B, 2007, OPHTHALMOLOGY, V114, P205, DOI 10.1016/J.OPHTHA.2006.07.060;BROADWAY DC, 1994, ARCH OPHTHALMOL-CHIC, V112, P1437, DOI 10.1001/ARCHOPHT.1994.01090230051020;DE SAINT JM, 2000, AM J OPHTHALMOL, V130, P264;DOGAN AL, 2004, CLIN EXP OPHTHALMOL, V32, P62, DOI 10.1046/J.1442-9071.2003.00760.X;GOZAWA M, 2017, ACTA OPHTHALMOL, V95, PE602, DOI 10.1111/AOS.13459;GOZAWA M, 2016, ACTA OPHTHA…	BACKGROUND TO DETERMINE THE EFFECT OF VARIOUS FACTORS TO THE PRESERVATION RATE OF THE CONJUNCTIVAL LAYER BORDERLINES OF GLAUCOMATOUS EYES TREATED WITH ANTI-GLAUCOMA EYE DROPS. METHODS ANTERIOR SEGMENT OPTICAL COHERENCE TOMOGRAPHY (AS-OCT) IMAGES OF THE BULBAR CONJUNCTIVA OF 328 EYES WERE ANALYZED WITH AND WITHOUT ANTI-GLAUCOMA EYE DROPS TO QUANTIFY THE PRESERVATION RATES OF THE CONJUNCTIVAL LAYER…	244				UNIV FUKUI, FAC MED SCI, DEPT OPHTHALMOL, 23-3 SHIMOAIZUKI, FUKUI 9101193, JAPAN.;	UNIVERSITY OF FUKUI					2024-02-18	GLAUCOMA; CONJUNCTIVA; ANTERIOR SEGMENT OPTICAL COHERENCE TOMOGRAPHY; ANTI-GLAUCOMA EYE DROPS	10.1186/s12886-020-01518-6	ARTICLE			1471-2415	MAKOTO.GOZAWA@GMAIL.COM					MC6CG	OCULAR SURFACE; IN-VITRO; LATANOPROST; PROGRESSION; MEDICATION; TIMOLOL; VIVO	1	BMC OPHTHALMOL	BMC OPHTHALMOL.	ENGLISH	22	GOLD, GREEN PUBLISHED		CAMPUS, 4 CRINAN ST, LONDON N1 9XW, ENGLAND	JUN 19	7	LONDON	32560643	J	BMC	2020		GOZAWA, M (CORRESPONDING AUTHOR), UNIV FUKUI, FAC MED SCI, DEPT OPHTHALMOL, 23-3 SHIMOAIZUKI, FUKUI 9101193, JAPAN.	OPHTHALMOLOGY				BMC OPHTHALMOLOGY
WY S;SHIN YI;KIM YK;JEOUNG JW;PARK KH	WY, SEOYOUNG;SHIN, YOUNG IN;KIM, YOUNG KOOK;JEOUNG, JIN WOOK;PARK, KI HO	BALAS MICHAEL, 2023, VISION (BASEL), V7, DOI 10.3390/VISION7030054;BEAUCHAMP GR, 1979, OPHTHALMOLOGY, V86, P170;BUFFAULT J, 2020, SCI REP-UK, V10, DOI 10.1038/S41598-020-61319-1;CANTOR LB, 2003, J GLAUCOMA, V12, P266, DOI 10.1097/00061198-200306000-00015;CHATZARA A, 2019, SEMIN OPHTHALMOL, V34, P93, DOI 10.1080/08820538.2019.1581820;FEA AM, 2020, CLIN OPHTHALMOL, V14, P1805, DOI 10.2147/OPTH.S178…	WE INVESTIGATED THE INTERNAL MORPHOLOGY OF FILTRATION BLEBS AFTER XEN GEL STENT IMPLANTATION USING ANTERIOR SEGMENT OPTICAL COHERENCE TOMOGRAPHY (AS-OCT) AND IDENTIFIED FACTORS RELATED TO INTRAOCULAR PRESSURE (IOP) POSTOPERATIVELY. EIGHTEEN EYES OF 18 PATIENTS WHO HAD UNDERGONE XEN GEL STENT IMPLANTATION WERE ANALYZED. BLEBS WERE IMAGED USING VISANTE OCT (CARL ZEISS MEDITEC AG, GERMANY) AT 6 MONT…	6740				SEOUL NATL UNIV, COLL MED, DEPT OPHTHALMOL, SEOUL 03080, SOUTH KOREA.; HANGIL EYE HOSP, INCHEON 21388, SOUTH KOREA.; SEOUL NATL UNIV HOSP, DEPT OPHTHALMOL, SEOUL 03080, SOUTH KOREA.;	SEOUL NATIONAL UNIVERSITY (SNU); SEOUL NATIONAL UNIVERSITY (SNU); SEOUL NATIONAL UNIVERSITY HOSPITAL					2024-02-18	XEN GEL STENT IMPLANTATION; BLEB MORPHOLOGY; ANTERIOR-SEGMENT OPTICAL COHERENCE TOMOGRAPHY	10.3390/jcm12216740	ARTICLE			2077-0383	WSY445@GMAIL.COM; POOHSYI@HANMAIL.NET; EYEDRY@SNU.AC.KR; NEUROPROTECT@SNU.AC.KR; KIHOPARK@SNU.AC.KR			MINISTRY OF TRADE, INDUSTRY AND ENERGY (MOTIE); KOREA INSTITUTE FOR ADVANCEMENT OF TECHNOLOGY (KIAT) THROUGH THE INTERNATIONAL COOPERATIVE RD PROGRAM [P0017190]	THIS RESEARCH WAS FINANCIALLY SUPPORTED BY THE MINISTRY OF TRADE, INDUSTRY AND ENERGY (MOTIE) AND KOREA INSTITUTE FOR ADVANCEMENT OF TECHNOLOGY (KIAT) THROUGH THE INTERNATIONAL COOPERATIVE R & D PROGRAM (PROJECT NO. P0017190).	X7NN4	FILTERING SURGERY; GLAUCOMA; DRUGS	21	J CLIN MED	J. CLIN. MED.	ENGLISH	42		SHIN, YOUNG IN/0000-0002-3791-0089	ST ALBAN-ANLAGE 66, CH-4052 BASEL, SWITZERLAND	NOV	11	BASEL	37959206	J	MDPI	2023		PARK, KH (CORRESPONDING AUTHOR), SEOUL NATL UNIV, COLL MED, DEPT OPHTHALMOL, SEOUL 03080, SOUTH KOREA.; PARK, KH (CORRESPONDING AUTHOR), SEOUL NATL UNIV HOSP, DEPT OPHTHALMOL, SEOUL 03080, SOUTH KOREA.	GENERAL & INTERNAL MEDICINE				JOURNAL OF CLINICAL MEDICINE
LENIS TL;GUNZENHAUSER RC;FUNG SSM;DHINDSA YK;SARRAF D;PINELES SL;TSUI I	LENIS, TAMARA L.;GUNZENHAUSER, ROBERT C.;FUNG, SIMON S. M.;DHINDSA, YASMEEN K.;SARRAF, DAVID;PINELES, STACY L.;TSUI, IRENA	BAKER PS, 2008, AM J OPHTHALMOL, V145, P1090, DOI 10.1016/J.AJO.2008.01.026;BALASUBRAMANIAN S, 2018, RETINA, V39, P2233;CHANG SHL, 2017, AM J OPHTHALMOL, V179, P46, DOI 10.1016/J.AJO.2017.04.010;CHEN YH, 2014, EYE, V28, P1081, DOI 10.1038/EYE.2014.172;CHOI MY, 2000, BRIT J OPHTHALMOL, V84, P138, DOI 10.1136/BJO.84.2.138;COOK A, 2003, INVEST OPHTH VIS SCI, V44, P953, DOI 10.1167/IOVS.02-0124;FALAV…	PURPOSE TO EVALUATE STRUCTURAL FEATURES AND VISUAL OUTCOMES IN EYES WITH A PRIOR HISTORY OF LASER TREATMENT FOR RETINOPATHY OF PREMATURITY (ROP). METHODS LASER-TREATED EYES FOR TYPE 1 ROP, PRETERM MONITORED EYES, AND FULL-TERM CONTROL EYES WERE INCLUDED. LOGMAR CONVERSION OF SNELLEN BEST-CORRECTED VISUAL ACUITY AND SPHERICAL EQUIVALENT BASED ON CYCLOPLEGIC REFRACTION WERE MEASURED IN CHILDREN 5-1…					UNIV CALIF LOS ANGELES, STEIN EYE INST, LOS ANGELES, CA USA.; UNIV CALIF LOS ANGELES, DAVID GEFFEN SCH MED, LOS ANGELES, CA USA.;	UNIVERSITY OF CALIFORNIA SYSTEM; UNIVERSITY OF CALIFORNIA LOS ANGELES; UNIVERSITY OF CALIFORNIA SYSTEM; UNIVERSITY OF CALIFORNIA LOS ANGELES; UNIVERSITY OF CALIFORNIA LOS ANGELES MEDICAL CENTER; DAVID GEFFEN SCHOOL OF MEDICINE AT UCLA					2024-02-18		10.1016/j.jaapos.2020.01.007	ARTICLE			1528-3933	PINELES@JSEI.UCLA.EDU			RESEARCH TO PREVENT BLINDNESS (SLP)	THIS RESEARCH WAS SUPPORTED BY AN UNRESTRICTED GRANT FROM RESEARCH TO PREVENT BLINDNESS (SLP).	LW0KG	INTRAVITREAL BEVACIZUMAB; REFRACTIVE OUTCOMES; CHAMBER ANGLE; CHILDREN; INFANTS; CLOSURE; ERROR	2	J AAPOS	J. AAPOS	ENGLISH	28			360 PARK AVENUE SOUTH, NEW YORK, NY 10010-1710 USA	APR	7	NEW YORK	32224286	J	MOSBY-ELSEVIER	2020		PINELES, SL (CORRESPONDING AUTHOR), 200 STEIN PLAZA, LOS ANGELES, CA 90095 USA.	OPHTHALMOLOGY; PEDIATRICS			1091-8531	JOURNAL OF AAPOS
RAMOS JLB;LI Y;HUANG D	RAMOS, JOSE LUIZ BRANCO;LI, YAN;HUANG, DAVID	ALIÓ JL, 2006, J REFRACT SURG, V22, P307;ALIÓ JL, 2005, J CATARACT REFR SURG, V31, P943, DOI 10.1016/J.JCRS.2004.09.050;AMBROSIO R, 2006, J CATARACT REFR SURG, V32, P1851, DOI 10.1016/J.JCRS.2006.06.025;ASBELL PA, 2001, J REFRACT SURG, V17, P25;BURRIS TE, 1993, J CATARACT REFR SURG, V19, P182, DOI 10.1016/S0886-3350(13)80404-X;CHALITA MR, 2005, AM J OPHTHALMOL, V140, P1133, DOI 10.1016/J.AJO.2005…	OPTICAL COHERENCE TOMOGRAPHY (OCT) IS BEING EMPLOYED MORE AND MORE OFTEN TO IMAGE PATHOLOGIES AND SURGICAL ANATOMY WITHIN THE ANTERIOR SEGMENT, SPECIFICALLY IN ANTERIOR CHAMBER BIOMETRY, CORNEAL PACHYMETRIC MAPPING, ANGLE EVALUATION AND HIGH-RESOLUTION CROSS-SECTIONAL IMAGING. THE CROSS-SECTIONAL IMAGING CAPABILITY OF OCT IS SIMILAR TO ULTRASOUND, BUT ITS HIGHER RESOLUTION ALLOWS OCT TO MEASURE A…				81	UNIV SO CALIF, KECK SCH MED, DOHENY EYE INST, CTR OPHTHALM OPT & LASERS, LOS ANGELES, CA 90033 USA.; UNIV SO CALIF, KECK SCH MED, DEPT OPHTHALMOL, LOS ANGELES, CA 90033 USA.;	UNIVERSITY OF SOUTHERN CALIFORNIA; DOHENY EYE INSTITUTE; UNIVERSITY OF SOUTHERN CALIFORNIA					2024-02-18	ANTERIOR CHAMBER; CLINICAL APPLICATIONS; CORNEA; OPTICAL COHERENCE TOMOGRAPHY	10.1111/j.1442-9071.2008.01823.x	REVIEW			1442-9071	DHUANG@USC.EDU	89		NIH [R01 EY018184, P30 EY03040]; OPTOVUE, INC.; RESEARCH TO PREVENT BLINDNESS, INC.; CHARLES C. MANGER III, MD CHAIR IN CORNEAL LASER SURGERY	THIS STUDY WAS FINANCIALLY SUPPORTED BY NIH GRANTS R01 EY018184 AND P30 EY03040; A GRANT FROM OPTOVUE, INC.; A UNRESTRICTED GRANT FROM RESEARCH TO PREVENT BLINDNESS, INC.; AND ENDOWMENT FUNDING FROM THE CHARLES C. MANGER III, MD CHAIR IN CORNEAL LASER SURGERY.	425AO	CORNEAL RING SEGMENTS; ULTRASOUND BIOMICROSCOPY; FEMTOSECOND LASER; CHAMBER ANGLE; KERATOCONUS; THICKNESS; INTACS; EYE; LASIK	1	CLIN EXP OPHTHALMOL	CLIN. EXP. OPHTHALMOL.	ENGLISH	36	GREEN ACCEPTED, BRONZE		111 RIVER ST, HOBOKEN 07030-5774, NJ USA	JAN-FEB	9	HOBOKEN	19016809	J	WILEY	2009		HUANG, D (CORRESPONDING AUTHOR), UNIV SO CALIF, KECK SCH MED, DOHENY EYE INST, CTR OPHTHALM OPT & LASERS, 1450 SAN PABLO ST,DEI 5702, LOS ANGELES, CA 90033 USA.	OPHTHALMOLOGY			1442-6404	CLINICAL AND EXPERIMENTAL OPHTHALMOLOGY
HIROSE F;HATA M;ITO S;MATSUKI T;KURIMOTO Y	HIROSE, FUMITAKA;HATA, MASAYUKI;ITO, SHIN-ICHIRO;MATSUKI, TAKAAKI;KURIMOTO, YASUO	ALSAGOFF Z, 2000, OPHTHALMOLOGY, V107, P2300, DOI 10.1016/S0161-6420(00)00385-7;BAÏKOFF G, 2005, J CATARACT REFR SURG, V31, P674, DOI 10.1016/J.JCRS.2004.09.034;ESAKI K, 2000, JPN J OPHTHALMOL, V44, P46, DOI 10.1016/S0021-5155(99)00173-2;FOSTER PJ, 2002, BRIT J OPHTHALMOL, V86, P238, DOI 10.1136/BJO.86.2.238;KHOR WB, 2010, J GLAUCOMA, V19, P365, DOI 10.1097/IJG.0B013E3181BF4DD5;KUNIMATSU S, 2005,…	THE PURPOSE OF THIS STUDY WAS TO INVESTIGATE AND MEASURE LIGHT-DARK CHANGES IN IRIS THICKNESS (IT) AND ANTERIOR CHAMBER ANGLE WIDTH IN EYES WITH OCCLUDABLE ANGLES AND OPEN ANGLES BY USING ANTERIOR SEGMENT OPTICAL COHERENCE TOMOGRAPHY (AS-OCT). WE EXAMINED 153 EYES OF 153 JAPANESE PATIENTS WITH PRIMARY ANGLE CLOSURE SUSPECT, PRIMARY ANGLE CLOSURE, PRIMARY ANGLE CLOSURE GLAUCOMA, OR PRIMARY OPEN AN…				2395	KOBE CITY MED CTR GEN HOSP, DEPT OPHTHALMOL, CHUO KU, KOBE, HYOGO 6500047, JAPAN.;	KOBE CITY MEDICAL CENTER GENERAL HOSPITAL					2024-02-18	PRIMARY ANGLE CLOSURE; GLAUCOMA; IRIS THICKNESS; ANTERIOR CHAMBER ANGLE WIDTH; ANTERIOR SEGMENT OPTICAL COHERENCE TOMOGRAPHY	10.1007/s00417-013-2378-4	ARTICLE				HIROSE@KCHO.JP	2402				220PW	OPTICAL COHERENCE TOMOGRAPHY; ULTRASOUND BIOMICROSCOPY; CLOSURE GLAUCOMA; AREA DECREASES; NARROW ANGLES; REPRODUCIBILITY; PREVALENCE	10	GRAEF ARCH CLIN EXP	GRAEFES ARCH. CLIN. EXP. OPHTHALMOL.	ENGLISH	23		HATA, MASAYUKI/0000-0002-5248-5762	233 SPRING ST, NEW YORK, NY 10013 USA	OCT	8	NEW YORK	23689995	J	SPRINGER	2013		HIROSE, F (CORRESPONDING AUTHOR), KOBE CITY MED CTR GEN HOSP, DEPT OPHTHALMOL, CHUO KU, 2-1-1 MINATOJIMA MINAMIMACHI, KOBE, HYOGO 6500047, JAPAN.	OPHTHALMOLOGY			0721-832X	GRAEFES ARCHIVE FOR CLINICAL AND EXPERIMENTAL OPHTHALMOLOGY
CHO HK;KEE C;YANG H;HUH HD;KIM SJ;PARK YM;PARK JM	CHO, HYUN-KYUNG;KEE, CHANGWON;YANG, HEON;HUH, HYOUN DO;KIM, SU JIN;PARK, YOUNG MIN;PARK, JONG MOON	ALSAGOFF Z, 2000, OPHTHALMOLOGY, V107, P2300, DOI 10.1016/S0161-6420(00)00385-7;CHEW PTK, 1995, INT OPHTHALMOL, V19, P67, DOI 10.1007/BF00133174;CHO HK, 2016, ACTA OPHTHALMOL;CHO HK, 2014, SURV OPHTHALMOL, V59, P434, DOI 10.1016/J.SURVOPHTHAL.2013.09.003;CONGDON N, 1992, SURV OPHTHALMOL, V36, P411, DOI 10.1016/S0039-6257(05)80022-0;FOSTER PJ, 2002, BRIT J OPHTHALMOL, V86, P238, DOI 10.1136/BJO.86…	PURPOSE: TO COMPARE THE QUANTITATIVE CHANGES OF PERIPHERAL ANGLE AFTER LASER IRIDOTOMY (LI) ALONE (GROUP A) OR COMBINED LI AND IRIDOPLASTY (GROUP B) USING IRIDOTRABECULAR CONTACT (ITC) INDEX BY SWEPT-SOURCE ANTERIOR SEGMENT OPTICAL COHERENCE TOMOGRAPHY (AS-OCT). METHODS: IN THIS PROSPECTIVE COMPARATIVE OBSERVATIONAL STUDY, OCT IMAGES WERE OBTAINED BEFORE AND AFTER THE PROCEDURE. IN EACH IMAGE FRA…				E539	GYEONGSANG NATL UNIV, CHANGWON HOSP, SCH MED, DEPT OPHTHALMOL, 11 SAMJEONGJA RO, CHANG WON 51472, GYEONGSANGNAM D, SOUTH KOREA.; SUNGKYUNKWAN UNIV, SCH MED, SAMSUNG MED CTR, DEPT OPHTHALMOL, SEOUL, SOUTH KOREA.; SUNGMO EYE HOSP, DEPT OPHTHALMOL, BUSAN, SOUTH KOREA.;	GYEONGSANG NATIONAL UNIVERSITY; SUNGKYUNKWAN UNIVERSITY (SKKU); SAMSUNG MEDICAL CENTER					2024-02-18	LASER IRIDOPLASTY; LASER IRIDOTOMY; PERIPHERAL ANGLE; PRIMARY ANGLE CLOSURE; SWEPT-SOURCE ANTERIOR SEGMENT OPTICAL COHERENCE TOMOGRAPHY	10.1111/aos.13450	ARTICLE			1755-3768	PARKJM@GNU.AC.KR	E547				FM0JE	OPTICAL COHERENCE TOMOGRAPHY; ANTERIOR-CHAMBER ANGLE; PLATEAU IRIS; GLAUCOMA; PREVALENCE; EYES; POPULATION; CHINESE; SUSPECTS; PEOPLE	7	ACTA OPHTHALMOL	ACTA OPHTHALMOL.	ENGLISH	38	BRONZE	PARK, YOUNG MIN/0000-0001-8495-9224	111 RIVER ST, HOBOKEN 07030-5774, NJ USA	NOV	9	HOBOKEN	28556512	J	WILEY	2017		PARK, JM (CORRESPONDING AUTHOR), GYEONGSANG NATL UNIV, CHANGWON HOSP, SCH MED, DEPT OPHTHALMOL, 11 SAMJEONGJA RO, CHANG WON 51472, GYEONGSANGNAM D, SOUTH KOREA.	OPHTHALMOLOGY			1755-375X	ACTA OPHTHALMOLOGICA
KOKUBUN T;TSUDA S;KUNIKATA H;HIMORI N;YOKOYAMA Y;OMODAKA K;KUNIMATSU-SANUKI S;NAKAZAWA T	KOKUBUN, TAIKI;TSUDA, SATORU;KUNIKATA, HIROSHI;HIMORI, NORIKO;YOKOYAMA, YU;OMODAKA, KAZUKO;KUNIMATSU-SANUKI, SHIHO;NAKAZAWA, TORU	ADDICKS EM, 1983, ARCH OPHTHALMOL-CHIC, V101, P795;ALLEN RC, 1982, OPHTHALMOLOGY, V89, P1181;BABALOLA O, 2014, ARCH DERMATOL RES, V306, P1, DOI 10.1007/S00403-013-1417-7;BEAUCHAMP GR, 1979, OPHTHALMOLOGY, V86, P170;BROADWAY D, 1995, J GLAUCOMA, V4, P136, DOI 10.1097/00061198-199504000-00012;CIANCAGLINI M, 2009, BRIT J OPHTHALMOL, V93, P1204, DOI 10.1136/BJO.2008.152496;DENK PO, 2003, CURR EYE RES…	PURPOSE: TO DETERMINE THE POTENTIAL OF ANTERIOR-SEGMENT OPTICAL COHERENCE TOMOGRAPHY (AS-OCT) TO PREDICT POSTTRABECULECTOMY OUTCOMES IN NEOVASCULAR GLAUCOMA (NVG). PATIENTS AND METHODS: WE RECRUITED 45 EYES OF 40 NVG PATIENTS WHO UNDERWENT TRABECULECTOMY. THE PATIENTS WERE DIVIDED INTO SUCCESS AND FAILURE GROUPS BASED ON THE POSTTRABECULECTOMY OUTCOME AFTER 12 MONTHS. AS-OCT FINDINGS WERE COMPARE…				1157	TOHOKU UNIV, GRAD SCH MED, DEPT OPHTHALMOL, AOBA KU, 1-1 SEIRYO MACHI, SENDAI, MIYAGI 9808574, JAPAN.; TOHOKU UNIV, GRAD SCH MED, DEPT RETINAL DIS CONTROL, OPHTHALMOL,AOBA KU, SENDAI, MIYAGI, JAPAN.; TOHOKU UNIV, GRAD SCH MED, DEPT ADV OPHTHALM MED, AOBA KU, SENDAI, MIYAGI, JAPAN.;	TOHOKU UNIVERSITY; TOHOKU UNIVERSITY; TOHOKU UNIVERSITY					2024-02-18	NVG; TRABECULECTOMY; FILTERING BLEB; PROGNOSIS; ANTERIOR-SEGMENT OPTICAL COHERENCE TOMOGRAPHY	10.1097/IJG.0000000000001081	ARTICLE			1536-481X	NTORU@OPH.MED.TOHOKU.AC.JP	1164		JST GRANT: A JSPS KAKENHI [26293372]; ALCON JAPAN LTD.	SUPPORTED IN PART BY A JST GRANT: A JSPS KAKENHI GRANT-IN-AID FOR SCIENTIFIC RESEARCH (B) (T.N. 26293372) AND RESEARCH GRANT ALCON JAPAN LTD.	HE6XQ	FILTERING BLEBS; MITOMYCIN-C; AQUEOUS-HUMOR; RISK-FACTORS; FOLLOW-UP; SURGERY; ACTIVATION	12	J GLAUCOMA	J. GLAUCOMA	ENGLISH	46			TWO COMMERCE SQ, 2001 MARKET ST, PHILADELPHIA, PA 19103 USA	DEC	8	PHILADELPHIA	30188465	J	LIPPINCOTT WILLIAMS & WILKINS	2018		NAKAZAWA, T (CORRESPONDING AUTHOR), TOHOKU UNIV, GRAD SCH MED, DEPT OPHTHALMOL, AOBA KU, 1-1 SEIRYO MACHI, SENDAI, MIYAGI 9808574, JAPAN.	OPHTHALMOLOGY			1057-0829	JOURNAL OF GLAUCOMA
ZANTUT F;GRACITELLI CPB;SOUZA PH;TEIXEIRA SH;PARANHOS JR A	ZANTUT, FABIO;GRACITELLI, CAROLINA PELEGRINI BARBOSA;SOUZA, PAULO H.;TEIXEIRA, SERGIO H.;PARANHOS JR., AUGUSTO	CHEN CW, 1983, TRANS ASIA PACIF ACAD OPHTHALMOL, V9, P172;DERMO F, 1979, AM J OPHTHALMOL, V88, P829, DOI 10.1016/0002-9394(79)90559-2;FELDMAN RM, 2008, J GLAUCOMA, V17, P594, DOI 10.1097/IJG.0B013E318181283E;GOLEZ E, 2012, SEMIN OPHTHALMOL, V27, P155, DOI 10.3109/08820538.2012.707275;KAPETANSKY F M, 1999, SEMIN OPHTHALMOL, V14, P144, DOI 10.3109/08820539909061467;KEICHER AS., 2010, MED LASER APPL…	INTRODUCTION: THIS STUDY AIMED TO EVALUATE THE CHARACTERISTICS OF THE FILTERING BLEB IN FAILED LATE TRABECULECTOMY AND THE AGREEMENT BETWEEN GLAUCOMA SPECIALIST ASSESSMENT AND ANTERIOR SEGMENT-OPTICAL COHERENCE TOMOGRAPHY (AS-OCT) SYSTEM ASSESSMENT IN TERMS OF THE PRESENCE OF SUBCONJUNCTIVAL FLUID IN THE FILTERING BLEB. METHODS: PATIENTS WITH A DIAGNOSIS OF GLAUCOMA WHO WERE SCHEDULED TO UNDERGO …				405	UNIV FED SAO PAULO, DEPT OPHTHALMOL & VISUAL SCI, SAO PAULO, SP, BRAZIL.; GLAUCOMA SERV VER MAIS OFTALMOL, VINHEDO, SP, BRAZIL.;	UNIVERSIDADE FEDERAL DE SAO PAULO (UNIFESP)					2024-02-18	GLAUCOMA; FILTERING BLEB; TRABECULECTOMY; ANTERIOR SEGMENT-OPTICAL COHERENCE TOMOGRAPHY	10.1159/000511642	ARTICLE			1423-0259	CAROLEPM@GMAIL.COM	410				YL1JI	TRABECULECTOMY; MORPHOLOGY; REVISION	3	OPHTHALMIC RES	OPHTHALMIC RES.	ENGLISH	21	BRONZE		ALLSCHWILERSTRASSE 10, CH-4009 BASEL, SWITZERLAND	JUN	6	BASEL	32942276	J	KARGER	2021		GRACITELLI, CPB (CORRESPONDING AUTHOR), UNIV FED SAO PAULO, RUA BOTUCATU 821,VILA CLEMENTINO, BR-04023062 SAO PAULO, SP, BRAZIL.	OPHTHALMOLOGY			0030-3747	OPHTHALMIC RESEARCH
LATA S;VENKATESH P;TEMKAR S;SELVAN H;GUPTA V;DADA T;UPADHYAY AD;SIHOTA R	LATA, SUMAN;VENKATESH, PRADEEP;TEMKAR, SHREYAS;SELVAN, HARATHY;GUPTA, VINEY;DADA, TANUJ;UPADHYAY, ASHISH D.;SIHOTA, RAMANJIT	AGARWAL S, 2017, INT SURG J, V4, P3433;ANONYMOUS, 1987, INT OPHTHALMOL CLIN, V27, P254;ANONYMOUS, 1976, AM J OPHTHALMOL, V81, P383;BIRINCI H, 2006, ANN SAUDI MED, V26, P73, DOI 10.5144/0256-4947.2006.73;BLONDEAU P, 1981, ARCH OPHTHALMOL-CHIC, V99, P1239;CHAPPELOW AV, 2012, AM J OPHTHALMOL, V153, P137, DOI 10.1016/J.AJO.2011.05.035;CHHABLANI J, 2018, SURV OPHTHALMOL, V63, P307, DOI 10.1016/J.SURVO…	PURPOSE: TO COMPARE INTRAOCULAR PRESSURE, ANTERIOR SEGMENT OPTICAL COHERENCE TOMOGRAPHY, AND ULTRASOUND BIOMICROSCOPY PARAMETERS OVER 3 MONTHS AFTER PANRETINAL PHOTOCOAGULATION (PRP) FOR PROLIFERATIVE DIABETIC RETINOPATHY AFTER 1 OF 2 SITTINGS BY CONVENTIONAL LASER (HALF PRP) AND A SINGLE SITTING OF PATTERN SCAN LASER (PASCAL) PRP. METHODS: THIS WAS A PROSPECTIVE, RANDOMIZED, INTERVENTIONAL STUDY…				537	ALL INDIA INST MED SCI, GLAUCOMA SERV, DR RAJENDRA PRASAD CTR OPHTHALM SCI, NEW DELHI, INDIA.; ALL INDIA INST MED SCI, VITREORETINA SERV, DR RAJENDRA PRASAD CTR OPHTHALM SCI, NEW DELHI, INDIA.; ALL INDIA INST MED SCI, DEPT BIOSTAT, NEW DELHI, INDIA.;	ALL INDIA INSTITUTE OF MEDICAL SCIENCES (AIIMS) NEW DELHI; DR. RAJENDRA PRASAD CENTRE FOR OPHTHALMIC SCIENCES; ALL INDIA INSTITUTE OF MEDICAL SCIENCES (AIIMS) NEW DELHI; DR. RAJENDRA PRASAD CENTRE FOR OPHTHALMIC SCIENCES; ALL INDIA INSTITUTE OF MEDICAL SCIENCES (AIIMS) NEW DELHI					2024-02-18	CONVENTIONAL LASER AND PASCAL; PANRETINAL PHOTOCOAGULATION; PROLIFERATIVE DIABETIC RETINOPATHY	10.1097/IAE.0000000000002400	ARTICLE			1539-2864	RJSIHOTA@GMAIL.COM	545				LA1RI	PROLIFERATIVE DIABETIC-RETINOPATHY; PHOTO-COAGULATION; SINGLE-SESSION; CHAMBER DEPTH; EYE; PREVALENCE; GLAUCOMA	3	RETINA-J RET VIT DIS	RETIN.-J. RETIN. VITR. DIS.	ENGLISH	26		HAQUE, NIAZ MD. ASHRAFUL/0000-0002-2273-0544; SELVAN, HARATHY/0000-0003-4403-8767; GUPTA, VINEY/0000-0002-8850-0485; LATA, SUMAN/0000-0002-2218-3130	TWO COMMERCE SQ, 2001 MARKET ST, PHILADELPHIA, PA 19103 USA	MAR	9	PHILADELPHIA	30531420	J	LIPPINCOTT WILLIAMS & WILKINS	2020		SIHOTA, R (CORRESPONDING AUTHOR), ALL INDIA INST MED SCI, DR RAJENDRA PRASAD CTR OPHTHALM SCI, GLAUCOMA RES FACIL & CLIN SERV, NEW DELHI 110029, INDIA.	OPHTHALMOLOGY			0275-004X	RETINA-THE JOURNAL OF RETINAL AND VITREOUS DISEASES
SILVA RNE;TANIGUCHI EV;CRUZAT A;PASCHALIS EI;PASQUALE LR;COLBY KA;DOHLMAN CH;CHODOSH J;SHEN LQ	SILVA, RAFAELLA NASCIMENTO E;TANIGUCHI, ELISE V.;CRUZAT, ANDREA;PASCHALIS, ELEFTHERIOS I.;PASQUALE, LOUIS R.;COLBY, KATHRYN A.;DOHLMAN, CLAES H.;CHODOSH, JAMES;SHEN, LUCY Q.	ALDAVE AJ, 2009, OPHTHALMOLOGY, V116, P640, DOI 10.1016/J.OPHTHA.2008.12.058;ALI MH, 2018, CORNEA, V37, P602, DOI 10.1097/ICO.0000000000001544;BANITT M, 2011, CURR OPIN OPHTHALMOL, V22, P133, DOI 10.1097/ICU.0B013E328343723D;CHONG RS, 2013, INVEST OPHTH VIS SCI, V54, P1650, DOI 10.1167/IOVS.12-9986;CHUNG CW, 2016, TRANSL VIS SCI TECHN, V5, DOI 10.1167/TVST.5.5.3;CRNEJ A, 2015, INVEST OPHTH VIS SC…	PURPOSE: TO QUANTITATIVELY ANALYZE THE ANGLE ANATOMY IN EYES WITH A BOSTON TYPE 1 KERATOPROSTHESIS (KPRO) USING ANTERIOR SEGMENT OPTICAL COHERENCE TOMOGRAPHY (AS-OCT) AND TO ASSESS THE DIAGNOSTIC ABILITY OF AS-OCT IN KPRO-ASSOCIATED GLAUCOMA. METHODS: AS-OCT (RTVUE) IMAGES FROM KPRO EYES WITH AND WITHOUT GLAUCOMA WERE REVIEWED. THE ANGLE OPENING DISTANCE AT 500 MU M FROM THE SCLERAL SPUR (AOD500)…				713	HARVARD MED SCH, MASSACHUSETTS EYE & EAR, DEPT OPHTHALMOL, BOSTON, MA 02115 USA.; UNIV SAO PAULO, DEPT OPHTHALMOL, SAO PAULO, BRAZIL.; UNIV FED SAO PAULO, DEPT OPHTHALMOL, SAO PAULO, BRAZIL.; PONTIFICIA UNIV CATOLICA CHILE, DEPT OPHTHALMOL, SANTIAGO, CHILE.; HARVARD MED SCH, SCHEPENS EYE RES INST, MASSACHUSETTS EYE & EAR, BOSTON KERATOPROSTHESIS LAB, BOSTON, MA 02115 USA.; ICAHN SCH MED MT SINAI,…	HARVARD UNIVERSITY; MASSACHUSETTS EYE & EAR INFIRMARY; HARVARD MEDICAL SCHOOL; UNIVERSIDADE DE SAO PAULO; UNIVERSIDADE FEDERAL DE SAO PAULO (UNIFESP); PONTIFICIA UNIVERSIDAD CATOLICA DE CHILE; HARVARD UNIVERSITY; SCHEPENS EYE RESEARCH INSTITUTE; MASSACHUSETTS EYE & EAR INFIRMARY; HARVARD MEDICAL SCHOOL; ICAHN SCHOOL OF MEDICINE AT MOUNT SINAI; UNIVERSITY OF CHICAGO					2024-02-18	BOSTON TYPE I KERATOPROSTHESIS; ANTERIOR SEGMENT OPTICAL COHERENCE TOMOGRAPHY; ANTERIOR CHAMBER ANGLE ANATOMY; GLAUCOMA	10.1097/ICO.0000000000002216	ARTICLE			1536-4798	LUCY_SHEN@MEEI.HARVARD.EDU	719		BOSTON KERATOPROSTHESIS, MASSACHUSETTS EYE AND EAR; TOPCON; NIH	THIS RESEARCH RECEIVED FUNDING SUPPORT FROM BOSTON KERATOPROSTHESIS, MASSACHUSETTS EYE AND EAR.; UNRELATED TO THIS WORK: R. NASCIMENTO E SILVA RECEIVES RESEARCH FUNDING FROM TOPCON. L. Q. SHEN IS A CONSULTANT FOR TOPCON AND RECEIVES RESEARCH FUNDING FROM TOPCON. L. R. PASQUALE IS A CONSULTANT FOR VERILY, BAUSCH & LOMB, NICOX, EMERALD BIOSCIENCE, AND EYENOVIA AND HAS NIH GRANT SUPPORT. J. CHODOSH …	NR8BP	OPTICAL COHERENCE TOMOGRAPHY; TYPE-1 KERATOPROSTHESIS; TERM OUTCOMES; IMPLANTATION; COMPLICATIONS; PROGRESSION; CLOSURE; VISION	6	CORNEA	CORNEA	ENGLISH	27		TANIGUCHI, ELISE/0000-0002-9825-0731; CRUZAT CORSSEN, ANDREA/0000-0002-3724-7037	TWO COMMERCE SQ, 2001 MARKET ST, PHILADELPHIA, PA 19103 USA	JUN	7	PHILADELPHIA	31764284	J	LIPPINCOTT WILLIAMS & WILKINS	2020		SHEN, LQ (CORRESPONDING AUTHOR), MASSACHUSETTS EYE & EAR, DEPT OPHTHALMOL, 243 CHARLES ST, BOSTON, MA 02114 USA.	OPHTHALMOLOGY			0277-3740	CORNEA
KONSTANTOPOULOS A;HOSSAIN P;ANDERSON DF	KONSTANTOPOULOS, ARISTIDES;HOSSAIN, PARWEZ;ANDERSON, DAVID F.	ALLOUCH C, 2002, J FR OPHTALMOL, V25, P799;BAIKOFF G, 2004, J CATARACT REFR SURG, V30, P2448, DOI 10.1016/J.JCRS.2004.07.005;BAIKOFF G, 2004, J CATARACT REFR SURG, V30, P2007, DOI 10.1016/J.JCRS.2004.05.018;BANDELLO F, 1998, OPHTHALMOLOGICA, V212, P133, DOI 10.1159/000027292;BAUM G, 1958, ARCH OPHTHALMOL-CHIC, V60, P263, DOI 10.1001/ARCHOPHT.1958.00940080279015;BREZINSKI ME, 1999, IEEE J SEL TOP …	ANTERIOR SEGMENT IMAGING IS A RAPIDLY ADVANCING FIELD OF OPHTHALMOLOGY. NEW IMAGING MODALITIES, SUCH AS ROTATING SCHEIMPFLUG IMAGING (PENTACAM-SCHEIMPFLUG) AND ANTERIOR SEGMENT OPTICAL COHERENCE TOMOGRAPHY (VISANTE OCT AND SLIT-LAMP OCT), HAVE RECENTLY BECOME COMMERCIALLY AVAILABLE. THESE NEW MODALITIES SUPPLEMENT THE MORE ESTABLISHED IMAGING DEVICES OF ORBSCAN SCANNING SLIT TOPOGRAPHY AND ULTRAS…				551	UNIV SOUTHAMPTON, EYE UNIT, SOUTHAMPTON SO16 6YD, HANTS, ENGLAND.;	UNIVERSITY OF SOUTHAMPTON					2024-02-18		10.1136/bjo.2006.103408	REVIEW			1468-2079	PARWEZ@SOTON.AC.UK	557				147XH	OPTICAL COHERENCE TOMOGRAPHY; ANGLE-CLOSURE GLAUCOMA; ULTRASOUND BIOMICROSCOPY; CHAMBER DEPTH; CORNEAL THICKNESS; IRIDOCORNEAL ANGLE; LASER IRIDOTOMY; ORBSCAN-II; LENS; PACHYMETRY	4	BRIT J OPHTHALMOL	BR. J. OPHTHALMOL.	ENGLISH	41	GREEN PUBLISHED	HOSSAIN, PARWEZ/0000-0002-3131-2395	BRITISH MED ASSOC HOUSE, TAVISTOCK SQUARE, LONDON WC1H 9JR, ENGLAND	APR	7	LONDON	17372341	J	BMJ PUBLISHING GROUP	2007	HOSSAIN, PARWEZ/AAB-6065-2022	HOSSAIN, P (CORRESPONDING AUTHOR), UNIV SOUTHAMPTON, EYE UNIT, MP104,TREMONA RD, SOUTHAMPTON SO16 6YD, HANTS, ENGLAND.	OPHTHALMOLOGY			0007-1161	BRITISH JOURNAL OF OPHTHALMOLOGY
CHANSANGPETCH S;NGUYEN A;MORA M;BADR M;HE MG;PORCO TC;LIN SC	CHANSANGPETCH, SUNEE;NGUYEN, ANWELL;MORA, MARTA;BADR, MAI;HE, MINGGUANG;PORCO, TRAVIS C.;LIN, SHAN C.	ANG M, 2013, PLOS ONE, V8, DOI 10.1371/JOURNAL.PONE.0065559;APTEL F, 2014, J REFRACT SURG, V30, P354, DOI 10.3928/1081597X-20140326-01;CONSOLE JW, 2008, BRIT J OPHTHALMOL, V92, P1612, DOI 10.1136/BJO.2007.129932;GOLDBERG DB, 2011, CLIN OPHTHALMOL, V5, P1559, DOI 10.2147/OPTH.S25983;HA AHNUL, 2016, KOREAN J OPHTHALMOL, V30, P140, DOI 10.3341/KJO.2016.30.2.140;IBRAHIM MA, 2012, EYE, V26, P454, DOI …	PURPOSE. TO ASSESS THE INTERDEVICE AGREEMENT BETWEEN SWEPT-SOURCE FOURIER-DOMAIN AND TIME-DOMAIN ANTERIOR SEGMENT OPTICAL COHERENCE TOMOGRAPHY (AS-OCT). METHODS. FIFTY-THREE EYES FROM 41 SUBJECTS UNDERWENT CASIA2 AND VISANTE OCT IMAGING. ONE HUNDRED EIGHTY-DEGREE AXIS IMAGES WERE MEASURED WITH THE BUILT-IN TWO-DIMENSIONAL ANALYSIS SOFTWARE FOR THE SWEPT-SOURCE FOURIER-DOMAIN AS-OCT (CASIA2) AND A…				1554	UNIV CALIF SAN FRANCISCO, DEPT OPHTHALMOL, 10 KORET WAY, SAN FRANCISCO, CA 94143 USA.; CHULALONGKORN UNIV, DEPT OPHTHALMOL, BANGKOK, THAILAND.; KING CHULALONGKORN MEM HOSP, THAI RED CROSS SOC, BANGKOK, THAILAND.; SUN YAT SEN UNIV, ZHONGSHAN OPHTHALM CTR, STATE KEY LAB OPHTHALMOL, GUANGZHOU, GUANGDONG, PEOPLES R CHINA.; UNIV MELBOURNE, ROYAL VICTORIAN EYE & EAR HOSP, CTR EYE RES AUSTRALIA, EAST ME…	UNIVERSITY OF CALIFORNIA SYSTEM; UNIVERSITY OF CALIFORNIA SAN FRANCISCO; CHULALONGKORN UNIVERSITY; THAI RED CROSS SOCIETY; CHULALONGKORN UNIVERSITY; SUN YAT SEN UNIVERSITY; CENTRE FOR EYE RESEARCH AUSTRALIA; UNIVERSITY OF MELBOURNE					2024-02-18	CASIA2; VISANTE OCT; ANTERIOR SEGMENT OPTICAL COHERENCE TOMOGRAPHY; SWEPT-SOURCE FOURIER-DOMAIN ANTERIOR SEGMENT OPTICAL COHERENCE TOMOGRAPHY; TIME-DOMAIN ANTERIOR SEGMENT OPTICAL COHERENCE TOMOGRAPHY	10.1167/iovs.17-23574	ARTICLE			1552-5783	SHAN.LIN@UCSF.EDU	1561		RESEARCH TO PREVENT BLINDNESS; NATIONAL INSTITUTES OF HEALTH/NATIONAL EYE INSTITUTE [EY002162]	SUPPORTED BY AN UNRESTRICTED GRANT FROM RESEARCH TO PREVENT BLINDNESS AND THE NATIONAL INSTITUTES OF HEALTH/NATIONAL EYE INSTITUTE EY002162 CORE GRANT FOR VISION RESEARCH. CASIA2 ANTERIOR SEGMENT OPTICAL COHERENCE TOMOGRAPHY EQUIPMENT HAS BEEN LOANED BY TOMEY CORPORATION, NAGOYA, JAPAN.	GB4CA	CHAMBER ANGLE MEASUREMENTS; NARROW ANGLES; GLAUCOMA; REPRODUCIBILITY; VISANTE; EYES; THICKNESS; BIOMETRY; DEVICES; CLOSURE	3	INVEST OPHTH VIS SCI	INVEST. OPHTHALMOL. VIS. SCI.	ENGLISH	34	GREEN PUBLISHED, GOLD	HE, MINGGUANG/0000-0002-6912-2810; LIU, YIZHI/0000-0003-4108-9593	12300 TWINBROOK PARKWAY, ROCKVILLE, MD 20852-1606 USA	MAR	8	ROCKVILLE	29625479	J	ASSOC RESEARCH VISION OPHTHALMOLOGY INC	2018	MORA, MARTA/HDM-9133-2022; HE, MING/JDN-0835-2023; HE, MINGGUANG/AAY-5239-2020; HE, MING/HZM-5794-2023	LIN, SC (CORRESPONDING AUTHOR), UNIV CALIF SAN FRANCISCO, DEPT OPHTHALMOL, 10 KORET WAY, SAN FRANCISCO, CA 94143 USA.	OPHTHALMOLOGY			0146-0404	INVESTIGATIVE OPHTHALMOLOGY & VISUAL SCIENCE
HUSSNAIN SA;KOVACS KD;WARREN JL;TENG CC	HUSSNAIN, SYED AMAL;KOVACS, KYLE D.;WARREN, JOSHUA L.;TENG, CHRISTOPHER C.	ABITBOL O, 2010, ACTA OPHTHALMOL, V88, P116, DOI 10.1111/J.1755-3768.2009.01554.X;CONGDON NG, 2006, AM J OPHTHALMOL, V141, P868, DOI 10.1016/J.AJO.2005.12.007;EMANUEL ME, 2014, CURR OPIN OPHTHALMOL, V25, P89, DOI 10.1097/ICU.0000000000000028;HOW AC, 2012, OPHTHALMOLOGY, V119, DOI 10.1016/J.OPHTHA.2012.01.019;HUSSNAIN SA, 2015, ACTA OPHTHALMOL, V93, PE627, DOI 10.1111/AOS.12726;LUCE DA, 2005, J CA…	IMPORTANCECORNEAL HYSTERESIS (CH) IS A DYNAMIC MARKER OF STRUCTURAL AND FUNCTIONAL CHANGES IN THE CORNEA ASSOCIATED WITH INTRAOCULAR PRESSURE (IOP) AND CENTRAL CORNEAL THICKNESS, BUT ITS UTILITY IN ASSESSING PRIMARY ANGLE CLOSURE SUSPECTS (PACS) HAS NOT BEEN FULLY ELUCIDATED. BACKGROUNDTHIS STUDY ASSESSES IF ANTERIOR SEGMENT MEASUREMENTS CORRELATE WITH CH IN PACS PATIENTS. DESIGNIRB-APPROVED RETR…				468	YALE SCH MED, DEPT OPHTHALMOL & VISUAL SCI, NEW HAVEN, CT USA.; YALE SCH PUBL HLTH, DEPT BIOSTAT, NEW HAVEN, CT USA.;	YALE UNIVERSITY; YALE UNIVERSITY					2024-02-18	CORNEAL HYSTERESIS; GLAUCOMA; OPTICAL COHERENCE TOMOGRAPHY; PRIMARY ANGLE-CLOSURE GLAUCOMA SUSPECTS	10.1111/ceo.13135	ARTICLE			1442-9071	KYLE.KOVACS@GMAIL.COM	472		RESEARCH TO PREVENT BLINDNESS; CLINICAL AND TRANSLATIONAL SCIENCE AWARDS PROGRAM FROM THE NATIONAL CENTER FOR ADVANCING TRANSLATIONAL SCIENCES (NCATS) [UL1 TR001863, KL2 TR001862]	THIS STUDY WAS SUPPORTED IN PART BY AN UNRESTRICTED DEPARTMENT GRANT FROM RESEARCH TO PREVENT BLINDNESS, AND ONE AUTHOR (JLW) IS THE RECIPIENT OF CLINICAL AND TRANSLATIONAL SCIENCE AWARDS PROGRAM GRANT NUMBERS UL1 TR001863 AND KL2 TR001862 FROM THE NATIONAL CENTER FOR ADVANCING TRANSLATIONAL SCIENCES (NCATS). THE AUTHORS HAVE NO OTHER FUNDING OR POTENTIAL CONFLICTS OF INTEREST TO DISCLOSE.	GM8QJ	OCULAR RESPONSE ANALYZER; BIOMECHANICAL PROPERTIES; INTRAOCULAR-PRESSURE; GLAUCOMATOUS EYES; THICKNESS; ASSOCIATION; MORPHOLOGY	5	CLIN EXP OPHTHALMOL	CLIN. EXP. OPHTHALMOL.	ENGLISH	22	GREEN ACCEPTED	WARREN, JOSHUA/0000-0002-6274-6970; TENG, CHRISTOPHER/0000-0002-9484-3572	111 RIVER ST, HOBOKEN 07030-5774, NJ USA	JUL	5	HOBOKEN	29251401	J	WILEY	2018		KOVACS, KD (CORRESPONDING AUTHOR), 40 TEMPLE ST,SUITE 302, NEW HAVEN, CT 06510 USA.	OPHTHALMOLOGY			1442-6404	CLINICAL AND EXPERIMENTAL OPHTHALMOLOGY
TSUTSUMI-KURODA U;KOJIMA S;FUKUSHIMA A;NAKASHIMA KI;IWAO K;TANIHARA H;INOUE T	TSUTSUMI-KURODA, UTAKO;KOJIMA, SACHI;FUKUSHIMA, AYAKO;NAKASHIMA, KEI-ICHI;IWAO, KEIICHIRO;TANIHARA, HIDENOBU;INOUE, TOSHIHIRO	CANTOR LB, 2003, J GLAUCOMA, V12, P266, DOI 10.1097/00061198-200306000-00015;INOUE T, 2014, CLIN EXP OPHTHALMOL, V42, P334, DOI 10.1111/CEO.12204;INOUE T, 2012, INVEST OPHTH VIS SCI, V53, P8288, DOI 10.1167/IOVS.12-10941;INOUE T, 2012, J CATARACT REFR SURG, V38, P1389, DOI 10.1016/J.JCRS.2012.04.028;KAWANA K, 2009, OPHTHALMOLOGY, V116, P848, DOI 10.1016/J.OPHTHA.2008.11.019;KOJIMA S, 2015, JAMA O…	BACKGROUND: THE OBJECT OF THIS STUDY IS TO INVESTIGATE THE EFFECT OF EARLY BLEB PARAMETERS MEASURED BY THREE-DIMENSIONAL ANTERIOR-SEGMENT OPTICAL COHERENCE TOMOGRAPHY ON THE SURGICAL SUCCESS OF TRABECULECTOMY. METHODS: THIS RETROSPECTIVE STUDY INCLUDED 45 PATIENTS WITH 19 OF EXFOLIATION GLAUCOMA, 17 OF PRIMARY OPEN ANGLE GLAUCOMA, 4 OF NEOVASCULAR GLAUCOMA, 4 OF UVEITIC GLAUCOMA AND 1 OF GLAUCOMA…	155				KUMAMOTO UNIV, FAC LIFE SCI, DEPT OPHTHALMOL, CHUO KU, 1-1-1 HONJO, KUMAMOTO 8608556, JAPAN.;	KUMAMOTO UNIVERSITY					2024-02-18	GLAUCOMA; TRABECULECTOMY; ANTERIOR SEGMENT OCT; FILTRATION OPENING; SURGICAL SUCCESS	10.1186/s12886-019-1159-1	ARTICLE			1471-2415	NOEL@DA2.SO-NET.NE.JP			MINISTRY OF HEALTH, LABOR AND WELFARE, TOKYO, JAPAN	THIS WORK WAS SUPPORTED BY GRANTS-IN-AID FOR SCIENTIFIC RESEARCH FROM THE MINISTRY OF HEALTH, LABOR AND WELFARE, TOKYO, JAPAN. THE FUNDERS HAD NO ROLE IN STUDY DESIGN, DATA COLLECTION AND ANALYSIS, DECISION TO PUBLISH, OR PREPARATION OF THE MANUSCRIPT.	IK3NE	MULTIPLE PROINFLAMMATORY CYTOKINES; FILTERING BLEBS; AQUEOUS-HUMOR; TRABECULECTOMY; APPEARANCE; GLAUCOMA		BMC OPHTHALMOL	BMC OPHTHALMOL.	ENGLISH	21	GREEN PUBLISHED, GOLD	INOUE, TOSHIHIRO/0000-0003-3769-7609; IWAO, KEIICHIRO/0000-0002-4102-9374	CAMPUS, 4 CRINAN ST, LONDON N1 9XW, ENGLAND	JUL 19	7	LONDON	31324172	J	BMC	2019		INOUE, T (CORRESPONDING AUTHOR), KUMAMOTO UNIV, FAC LIFE SCI, DEPT OPHTHALMOL, CHUO KU, 1-1-1 HONJO, KUMAMOTO 8608556, JAPAN.	OPHTHALMOLOGY				BMC OPHTHALMOLOGY
CAMPBELL P;REDMOND T;AGARWAL R;MARSHALL LR;EVANS BJW	CAMPBELL, PETER;REDMOND, TONY;AGARWAL, RISHI;MARSHALL, LEWIS R.;EVANS, BRUCE J. W.	ALTMAN DG, 1991, PRACTICAL STAT MED R, V1, P396;AOA, 2011, CAR PAT OP ANGL GLAU;BELL RWD, 1997, OPHTHAL PHYSL OPT, V17, P7;BLAND JM, 1986, LANCET, V1, P307, DOI 10.1016/S0140-6736(86)90837-8;BREZINSKI ME, 1999, IEEE J SEL TOP QUANT, V5, P1185, DOI 10.1109/2944.796345;CLOPPER CJ, 1934, BIOMETRIKA, V26, P404, DOI 10.2307/2331986;COLLEGE OF OPTOMETRISTS, EX PAT RISK GLAUC;DABASIA PL, 2014, OPHTHAL P…	PURPOSETO ASSESS THE REPEATABILITY OF GONIOSCOPY, VAN HERICK METHOD AND ANTERIOR SEGMENT OPTICAL COHERENCE TOMOGRAPHY (AS-OCT) AND DETERMINE THE AGREEMENT BETWEEN THESE TECHNIQUES WITHIN A COMMUNITY OPTOMETRY SETTING. METHODSGONIOSCOPY, VAN HERICK METHOD AND AS-OCT IMAGING WERE PERFORMED BY AN OPTOMETRIST ON TWO OCCASIONS, 1MONTH APART, ON 80 SUBJECTS AGED OVER 40YEARS RECRUITED FROM COMMUNITY OP…				170	ST THOMAS HOSP, OPHTHALMOL, LONDON, ENGLAND.; NEVILLE CHAPPELL RES CLIN, INST OPTOMETRY, LONDON, ENGLAND.; LONDON S BANK UNIV, FAC HLTH & SOCIAL CARE, LONDON, ENGLAND.; CARDIFF UNIV, SCH OPTOMETRY & VIS SCI, CARDIFF CF10 3AX, S GLAM, WALES.; COLE MARTIN TREGASKIS OPTOMETRISTS, BRENTWOOD, ESSEX, ENGLAND.;	GUY'S & ST THOMAS' NHS FOUNDATION TRUST; UNIVERSITY OF LONDON; UNIVERSITY COLLEGE LONDON; LONDON SOUTH BANK UNIVERSITY; CARDIFF UNIVERSITY					2024-02-18	ANTERIOR CHAMBER; ANTERIOR SEGMENT; ANTERIOR SEGMENT OPTICAL COHERENCE TOMOGRAPHY; GONIOSCOPY; IMAGING; VAN HERICK	10.1111/opo.12200	ARTICLE			1475-1313	PETER.CAMPBELL@GSTT.NHS.UK	178		COLLEGE OF OPTOMETRISTS IPRO SMALL GRANTS SCHEME AWARD	THIS WORK WAS SUPPORTED BY A COLLEGE OF OPTOMETRISTS IPRO SMALL GRANTS SCHEME AWARD. WE THANK PROFESSOR NICOLA CRICHTON OF LONDON SOUTH BANK UNIVERSITY FOR HELP WITH STATISTICAL ANALYSIS.	CD6QN	OPTICAL COHERENCE TOMOGRAPHY; CLOSURE GLAUCOMA; UK OPTOMETRISTS; NARROW ANGLES; SEGMENT; POPULATION; GONIOSCOPY; AGREEMENT	2	OPHTHAL PHYSL OPT	OPHTHALMIC PHYSIOL. OPT.	ENGLISH	35	GREEN ACCEPTED	REDMOND, TONY/0000-0002-6997-5231; CAMPBELL, PETER/0000-0002-6019-1596; EVANS, BRUCE/0000-0003-2824-4595	111 RIVER ST, HOBOKEN 07030-5774, NJ USA	MAR	9	HOBOKEN	25761580	J	WILEY-BLACKWELL	2015	REDMOND, TONY/E-9998-2013	CAMPBELL, P (CORRESPONDING AUTHOR), ST THOMAS HOSP, OPHTHALMOL, LONDON, ENGLAND.	OPHTHALMOLOGY			0275-5408	OPHTHALMIC AND PHYSIOLOGICAL OPTICS
WANG DD;PEKMEZCI M;BASHAM RP;HE MG;SEIDER MI;LIN SC	WANG, DANDAN;PEKMEZCI, MELIKE;BASHAM, RYAN P.;HE, MINGGUANG;SEIDER, MICHAEL I.;LIN, SHAN C.	DADA T, 2007, J CATARACT REFR SURG, V33, P837, DOI 10.1016/J.JCRS.2007.01.021;FINK W, 2005, J BIOMED OPT, V10, DOI 10.1117/1.1899683;GOLDSMITH JA, 2005, OPHTHALMOLOGY, V112, P238, DOI 10.1016/J.OPHTHA.2004.09.019;HUANG SH, 2004, INT J IMMUNOPATH PH, V17, P1;ISHIKAWA H, 2000, OPHTHALMIC SURG LAS, V31, P342;ISHIKAWA H, 1999, JPN J OPHTHALMOL, V43, P526, DOI 10.1016/S0021-5155(99)00139-2;ISHIKAWA H,…	PURPOSE: TO COMPARE ANTERIOR CHAMBER ANGLE WIDTH MEASUREMENTS BY LOW AND HIGH-RESOLUTION ANTERIOR SEGMENT OPTICAL COHERENCE TOMOGRAPHY (AS-OCT) AND ULTRASOUND BIOMICROSCOPY (UBM). PATIENTS AND METHODS: THIRTY-SIX EYES OF 32 PATIENTS WITH GONIOSCOPICALLY NARROW ANGLES FROM A UNIVERSITY-BASED GLAUCOMA CLINIC WERE RECRUITED IN THE STUDY. ALL SUBJECTS RECEIVED AS-OCT (IN "ANTERIOR SEGMENT SINGLE" MOD…				472	UNIV CALIF SAN FRANCISCO, DEPT OPHTHALMOL, SAN FRANCISCO, CA 94143 USA.; SUN YAT SEN UNIV, ZHONGSHAN OPHTHALM CTR, STATE KEY LAB OPHTHALMOL, GUANGZHOU 510275, GUANGDONG, PEOPLES R CHINA.;	UNIVERSITY OF CALIFORNIA SYSTEM; UNIVERSITY OF CALIFORNIA SAN FRANCISCO; SUN YAT SEN UNIVERSITY					2024-02-18	ANTERIOR SEGMENT OPTICAL COHERENCE TOMOGRAPHY; ULTRASOUND BIOMICROSCOPY; ANTERIOR CHAMBER ANGLE	10.1097/IJG.0b013e31818fb41d	ARTICLE			1536-481X	LINS@VISION.UCSF.EDU	478		HEARST FOUNDATION; MAN MAY SEE INC; RESEARCH TO PREVENT BLINDNESS; NEI CORE [EY02162]	SUPPORT BY THE HEARST FOUNDATION; THAT MAN MAY SEE INC; RESEARCH TO PREVENT BLINDNESS; AND THE NEI CORE GRANT NO. EY02162.	485WY	SEGMENT; REPRODUCIBILITY; INTRAOBSERVER; IMAGES; WIDTH	6	J GLAUCOMA	J. GLAUCOMA	ENGLISH	21		HE, MINGGUANG/0000-0002-6912-2810;	TWO COMMERCE SQ, 2001 MARKET ST, PHILADELPHIA, PA 19103 USA	AUG	7	PHILADELPHIA	19680056	J	LIPPINCOTT WILLIAMS & WILKINS	2009	HE, MING/HZM-5794-2023; HE, MINGGUANG/AAY-5239-2020; HE, MING/JDN-0835-2023; LIN, QING/JED-5250-2023	LIN, SC (CORRESPONDING AUTHOR), BOX 0730,10 KORET WAY, SAN FRANCISCO, CA 94143 USA.	OPHTHALMOLOGY			1057-0829	JOURNAL OF GLAUCOMA
DESMOND T;TRAN V;MAHARAJ M;CARNT N;WHITE A	DESMOND, THOMAS;TRAN, VINCENT;MAHARAJ, MONISH;CARNT, NICOLE;WHITE, ANDREW	ASIA-PACIFIC GLAUCOMA SOCIETY, 2016, ASIA-PACIFIC GLAUCOMA GUIDELINES;ASIAN PACIFIC GLAUCOMA SOCIETY (APGS), 2016, AS PAC GLAUC GUID;BASKARAN M, 2012, ACTA OPHTHALMOL COPE, V90;BASKARAN M, 2015, OPHTHALMOLOGY, V122, P2380, DOI 10.1016/J.OPHTHA.2015.07.030;BASKARAN M, 2013, OPHTHALMOLOGY, V120, P2226, DOI 10.1016/J.OPHTHA.2013.04.020;CAMPBELL P, 2014, INVEST OPHTH VIS SCI, V55;CAMPBELL P, 2015, OP…	PURPOSE THIS STUDY AIMS TO REVIEW THE LITERATURE THAT COMPARES THE ACCURACY OF ANTERIOR SEGMENT-OPTICAL COHERENCE TOMOGRAPHY (AS-OCT) AGAINST GONIOSCOPY IN DETECTING EYES WITH ANGLE CLOSURE. IT IS CURRENTLY UNCLEAR HOW AS-OCT FITS INTO CLINICAL PRACTICE FOR DETECTING ANGLE CLOSURE. THIS IS A SYSTEMATIC REVIEW AND META-ANALYSIS. METHODS A LITERATURE SEARCH WAS PERFORMED ON MEDLINE, EMBASE, SCOPUS …				1	UNIV SYDNEY, SYDNEY MED SCH, SYDNEY, NSW, AUSTRALIA.; UNIV NEW SOUTH WALES, SCH OPTOMETRY & VIS SCI, SYDNEY, NSW, AUSTRALIA.; UNIV NEW SOUTH WALES, FAC MED, SYDNEY, NSW, AUSTRALIA.; WAIKATO HOSP, DEPT NEUROSURG, HAMILTON, NEW ZEALAND.; WESTMEAD INST MED RES, SYDNEY, NSW, AUSTRALIA.; UCL, INST OPHTHALMOL, LONDON, ENGLAND.;	UNIVERSITY OF SYDNEY; UNIVERSITY OF NEW SOUTH WALES SYDNEY; UNIVERSITY OF NEW SOUTH WALES SYDNEY; WAIKATO HOSPITAL; UNIVERSITY OF SYDNEY; WESTMEAD INSTITUTE FOR MEDICAL RESEARCH; UNIVERSITY OF LONDON; UNIVERSITY COLLEGE LONDON					2024-02-18	ANTERIOR SEGMENT OPTICAL COHERENCE TOMOGRAPHY; OCT; GLAUCOMA; NARROW ANGLE; GONIOSCOPY; SCREENING	10.1007/s00417-021-05271-4	REVIEW; EARLY ACCESS	JUL 2021		1435-702X	THOMAS@THOMASDESMOND.NET	23				YI0WK	OPTICAL COHERENCE TOMOGRAPHY; ANTERIOR-CHAMBER ANGLE; NARROW ANGLES; GLAUCOMA; PARAMETERS; CLASSIFICATION; REPEATABILITY; ASSOCIATION; POPULATION; PREVALENCE	1	GRAEF ARCH CLIN EXP	GRAEFES ARCH. CLIN. EXP. OPHTHALMOL.	ENGLISH	53	GREEN PUBLISHED, BRONZE	TRAN, VINCENT/0000-0002-5659-3859	ONE NEW YORK PLAZA, SUITE 4600, NEW YORK, NY, UNITED STATES	2022 JAN	23	NEW YORK	34223989	J	SPRINGER	2022	WHITE, ANDREW JR/E-8462-2013	DESMOND, T (CORRESPONDING AUTHOR), UNIV SYDNEY, SYDNEY MED SCH, SYDNEY, NSW, AUSTRALIA.; DESMOND, T (CORRESPONDING AUTHOR), UNIV NEW SOUTH WALES, SCH OPTOMETRY & VIS SCI, SYDNEY, NSW, AUSTRALIA.	OPHTHALMOLOGY			0721-832X	GRAEFES ARCHIVE FOR CLINICAL AND EXPERIMENTAL OPHTHALMOLOGY
HONG S;YI JH;KANG SY;SEONG GJ;KIM CY	HONG, SAMIN;YI, JEONG-HO;KANG, SUNG YONG;SEONG, GONG JE;KIM, CHAN YUN	ALSBIRK PH, 1975, ACTA OPHTHALMOL, V53, P89;BONOMI L, 2000, OPHTHALMOLOGY, V107, P998, DOI 10.1016/S0161-6420(00)00022-1;CHEW PTK, 2001, J GLAUCOMA, V10, PS7, DOI 10.1097/00061198-200110001-00004;DANDONA L, 2000, OPHTHALMOLOGY, V107, P1710, DOI 10.1016/S0161-6420(00)00274-8;FOSTER PJ, 2002, BRIT J OPHTHALMOL, V86, P238, DOI 10.1136/BJO.86.2.238;FOSTER PJ, 2000, BRIT J OPHTHALMOL, V84, P186, DOI 1…	PURPOSE: TO ASSESS EFFICACY OF THE PENTACAM (PTC) AND THE ANTERIOR SEGMENT OPTICAL COHERENCE TOMOGRAPHY (AOCT) FOR DETECTION OF OCCLUDABLE ANGLES. MATERIALS AND METHODS: FOURTY-ONE EYES WITH GONIOSCOPICALLY DIAGNOSED OCCLUDABLE ANGLES AND 32 NORMAL OPEN-ANGLE EYES WERE INCLUDED. ANTERIOR CHAMBER ANGLE (ACA) AND ANTERIOR CHAMBER DEPTH (ACD) WERE MEASURED WITH PTC AND AOCT. RECEIVER OPERATING CHARA…				525	YONSEI UNIV, COLL MED, DEPT OPHTHALMOL, INST VIS RES, SEOUL 120752, SOUTH KOREA.;	YONSEI UNIVERSITY; YONSEI UNIVERSITY HEALTH SYSTEM		BERLIN, GERMANY	8TH CONGRESS OF THE EUROPEAN-GLAUCOMA-SOCIETY	JUN 01-06, 2008	2024-02-18	PENTACAM; ANTERIOR SEGMENT OPTICAL COHERENCE TOMOGRAPHY; OCCLUDABLE ANGLE; ANTERIOR CHAMBER ANGLE; ANTERIOR CHAMBER DEPTH	10.3349/ymj.2009.50.4.525	ARTICLE; PROCEEDINGS PAPER			1976-2437	KCYEYE@YUHS.AC	528				486ND	CLOSURE GLAUCOMA; CHAMBER-DEPTH; PREVALENCE	4	YONSEI MED J	YONSEI MED. J.	ENGLISH	16	GREEN SUBMITTED, GREEN PUBLISHED, GOLD	SEONG, GONG JE/0000-0002-5456-4296; KIM, CHAN YUN/0000-0002-8373-9999	50-1 YONSEI-RO, SEODAEMUN-GU, SEOUL 120-752, SOUTH KOREA	AUG 31	4	SEOUL	19718401	J	YONSEI UNIV COLL MEDICINE	2009		KIM, CY (CORRESPONDING AUTHOR), YONSEI UNIV, COLL MED, DEPT OPHTHALMOL, INST VIS RES, 250 SEONGSAN RO, SEOUL 120752, SOUTH KOREA.	GENERAL & INTERNAL MEDICINE			0513-5796	YONSEI MEDICAL JOURNAL
SAKATA LM;LAVANYA R;FRIEDMAN DS;AUNG HT;SEAH SK;FOSTER PJ;AUNG T	SAKATA, LISANDRO M.;LAVANYA, RAGHAVAN;FRIEDMAN, DAVID S.;AUNG, HAN T.;SEAH, STEVE K.;FOSTER, PAUL J.;AUNG, TIN	GAZZARD G, 2003, OPHTHALMOLOGY, V110, P630, DOI 10.1016/S0161-6420(02)01893-6;GOLDSMITH JA, 2005, OPHTHALMOLOGY, V112, P238, DOI 10.1016/J.OPHTHA.2004.09.019;IZATT JA, 1994, ARCH OPHTHALMOL-CHIC, V112, P1584, DOI 10.1001/ARCHOPHT.1994.01090240090031;LANDIS JR, 1977, BIOMETRICS, V33, P159, DOI 10.2307/2529310;MARCHINI G, 1998, OPHTHALMOLOGY, V105, P2091, DOI 10.1016/S0161-6420(98)91132-0;NOLAN WP,…	OBJECTIVE: TO ASSESS VISIBILITY OF THE SCLERAL SPUR IN ANTERIOR SEGMENT OPTICAL COHERENCE TOMOGRAPHY (AS-OCT) IMAGES. METHODS: THIS CROSS-SECTIONAL OBSERVATIONAL STUDY INCLUDED 502 PARTICIPANTS AGED 50 YEARS OR OLDER WHO HAD NO PREVIOUS OPHTHALMIC PROBLEMS AND WERE RECRUITED FROM A COMMUNITY CLINIC IN SINGAPORE. ALL PARTICIPANTS UNDERWENT GONIOSCOPY AND AS-OCT (VISANTE; CARL ZEISS MEDITEC, DUBLIN…				181	SINGAPORE NATL EYE CTR, SINGAPORE 168751, SINGAPORE.; EYE RES INST, SINGAPORE 168751, SINGAPORE.; WILMER EYE INST, BALTIMORE, MD USA.; JOHNS HOPKINS UNIV, SCH PUBL HLTH, BALTIMORE, MD USA.; MOORFIELDS EYE HOSP, LONDON, ENGLAND.; INST OPHTHALMOL, LONDON, ENGLAND.;	SINGAPORE NATIONAL EYE CENTER; JOHNS HOPKINS UNIVERSITY; JOHNS HOPKINS MEDICINE; JOHNS HOPKINS UNIVERSITY; UNIVERSITY OF LONDON; UNIVERSITY COLLEGE LONDON; MOORFIELDS EYE HOSPITAL NHS FOUNDATION TRUST; UNIVERSITY OF LONDON; UNIVERSITY COLLEGE LONDON					2024-02-18		10.1001/archophthalmol.2007.46	ARTICLE			1538-3601	TIN11@PACIFIC.NET.SG	185				261DQ	ULTRASOUND BIOMICROSCOPY; ASIAN EYES; CHAMBER; ANGLE; WIDTH	2	ARCH OPHTHALMOL-CHIC	ARCH. OPHTHALMOL.	ENGLISH	14		FOSTER, PAUL/0000-0002-4755-177X; FRIEDMAN, DAVID/0000-0002-2055-5797	330 N WABASH AVE, STE 39300, CHICAGO, IL 60611-5885 USA	FEB	5	CHICAGO	18268207	J	AMER MEDICAL ASSOC	2008	FOSTER, PAUL/V-7288-2019; TIN, AUNG/B-6521-2009	AUNG, HT (CORRESPONDING AUTHOR), SINGAPORE NATL EYE CTR, 11 3RD HOSP AVE, SINGAPORE 168751, SINGAPORE.	OPHTHALMOLOGY			0003-9950	ARCHIVES OF OPHTHALMOLOGY
SACCHI M;AGNIFILI L;BRESCIA L;ODDONE F;VILLANI E;NUCCI P;MASTROPASQUA L	SACCHI, MATTEO;AGNIFILI, LUCA;BRESCIA, LORENZA;ODDONE, FRANCESCO;VILLANI, EDOARDO;NUCCI, PAOLO;MASTROPASQUA, LEONARDO	AGNIFILI L, 2016, INVEST OPHTH VIS SCI, V57, P2928, DOI 10.1167/IOVS.16-19257;AMAR N, 2008, OPHTHALMOLOGY, V115, P1154, DOI 10.1016/J.OPHTHA.2007.10.024;ANONYMOUS, 2014, TERM GUID GLAUC, P1;CANTOR LB, 2003, J GLAUCOMA, V12, P266, DOI 10.1097/00061198-200306000-00015;CIANCAGLINI M, 2009, BRIT J OPHTHALMOL, V93, P1204, DOI 10.1136/BJO.2008.152496;CIANCAGLINI M, 2008, J GLAUCOMA, V17, P308, DOI 10.1…	PURPOSE TO DESCRIBE AND COMPARE THE CONJUNCTIVAL FILTERING BLEB FEATURES AFTER XEN GEL IMPLANTATION AND TRABECULECTOMY USING ANTERIOR SEGMENT OPTICAL COHERENCE TOMOGRAPHY (AS-OCT) AND IN VIVO CONFOCAL MICROSCOPY (IVCM). METHODS FIFTY-TWO PATIENTS WHO UNDERWENT COMPLETELY SUCCESSFUL TRABECULECTOMY (24 EYES) OR COMPLETELY SUCCESSFUL XEN GEL IMPLANTATION (28 EYES) WERE CONSECUTIVELY ENROLLED. AT THE…				1763	UNIV MILAN, UNIV EYE CLIN, SAN GIUSEPPE HOSP, MILAN, ITALY.; UNIV G DANNUNZIO, DEPT MED & AGING SCI, OPHTHALMOL CLIN, VIA VESTINI, I-66100 CHIETI, CH, ITALY.; IRCCS FDN GB BIETTI, ROME, ITALY.;	UNIVERSITY OF MILAN; G D'ANNUNZIO UNIVERSITY OF CHIETI-PESCARA; IRCCS -FONDAZIONE "G.B. BIETTI" PER LO STUDIO E LA RICERCA IN OFTALMOLOGIA					2024-02-18	GLAUCOMA; XEN GEL IMPLANTATION; TRABECULECTOMY; FILTRATION BLEBS; IN VIVO CONFOCAL MICROSCOPY; ANTERIOR SEGMENT OPTICAL COHERENCE TOMOGRAPHY	10.1007/s00417-020-04671-2	ARTICLE; EARLY ACCESS	MAY 2020		1435-702X	L.AGNIFILI@UNICH.IT	1770				MN9RI	GLAUCOMA FILTRATION SURGERY; MICROSCOPY	8	GRAEF ARCH CLIN EXP	GRAEFES ARCH. CLIN. EXP. OPHTHALMOL.	ENGLISH	31		ODDONE, FRANCESCO/0000-0002-2504-0004; SACCHI, MATTEO/0000-0001-6399-3140; NUCCI, PAOLO/0000-0002-4036-703X; SACCHI, MATTEO/0000-0001-8313-4909	ONE NEW YORK PLAZA, SUITE 4600, NEW YORK, NY, UNITED STATES	2020 AUG	8	NEW YORK	32415535	J	SPRINGER	2020	ODDONE, FRANCESCO/K-8876-2016; AGNIFILI, LUCA/AAC-6345-2022; BRESCIA, LORENZA/AAC-6416-2022; SACCHI, MATTEO/AAN-8216-2020; NUCCI, PAOLO/J-9523-2016	AGNIFILI, L (CORRESPONDING AUTHOR), UNIV G DANNUNZIO, DEPT MED & AGING SCI, OPHTHALMOL CLIN, VIA VESTINI, I-66100 CHIETI, CH, ITALY.	OPHTHALMOLOGY			0721-832X	GRAEFES ARCHIVE FOR CLINICAL AND EXPERIMENTAL OPHTHALMOLOGY
RADHAKRISHNAN S;SEE J;SMITH SD;NOLAN WP;CE Z;FRIEDMAN DS;HUANG D;LI Y;AUNG T;CHEW PTK	RADHAKRISHNAN, SUNITA;SEE, JOVINA;SMITH, SCOTT D.;NOLAN, WINIFRED P.;CE, ZHENG;FRIEDMAN, DAVID S.;HUANG, DAVID;LI, YAN;AUNG, TIN;CHEW, PAUL T. K.	HOERAUF H, 2000, OPHTHALMIC SURG LAS, V31, P218;HUANG D, 1991, SCIENCE, V254, P1178, DOI 10.1126/SCIENCE.1957169;ISHIKAWA H, 2000, CURR OPIN OPHTHALMOL, V11, P133, DOI 10.1097/00055735-200004000-00012;IZATT JA, 1994, ARCH OPHTHALMOL-CHIC, V112, P1584, DOI 10.1001/ARCHOPHT.1994.01090240090031;KARANDISH A, 2004, OPHTHALMOLOGE, V101, P608, DOI 10.1007/S00347-003-0968-Y;MEINHARDT B, 2006, GRAEF ARCH …	PURPOSE. TO EVALUATE THE REPRODUCIBILITY OF ANTERIOR CHAMBER (AC) ANGLE MEASUREMENTS OBTAINED USING ANTERIOR SEGMENT OPTICAL COHERENCE TOMOGRAPHY (AS-OCT). METHODS. PATIENTS WITH SUSPECTED GLAUCOMA AND THOSE WITH GLAUCOMA, OCULAR HYPERTENSION, OR ANATOMICALLY NARROW ANGLES WERE RECRUITED FROM THE GLAUCOMA SERVICE AT THE NATIONAL UNIVERSITY HOSPITAL, SINGAPORE. ALL SUBJECTS UNDERWENT IMAGING OF TH…				3683	WILMER EYE INST, BALTIMORE, MD USA.; NATL UNIV SINGAPORE HOSP, SINGAPORE 117548, SINGAPORE.; NATL UNIV SINGAPORE, SINGAPORE 117548, SINGAPORE.; JOHNS HOPKINS UNIV, BLOOMBERG SCH PUBL HLTH, BALTIMORE, MD USA.; UNIV SO CALIF, DOHENY EYE INST, KECK SCH MED, LOS ANGELES, CA USA.; UNIV SO CALIF, DEPT OPHTHALMOL, KECK SCH MED, LOS ANGELES, CA 90089 USA.; SINGAPORE NATL EYE CTR, SINGAPORE, SINGAPORE.;	JOHNS HOPKINS UNIVERSITY; JOHNS HOPKINS MEDICINE; NATIONAL UNIVERSITY OF SINGAPORE; NATIONAL UNIVERSITY OF SINGAPORE; JOHNS HOPKINS UNIVERSITY; JOHNS HOPKINS BLOOMBERG SCHOOL OF PUBLIC HEALTH; DOHENY EYE INSTITUTE; UNIVERSITY OF SOUTHERN CALIFORNIA; UNIVERSITY OF SOUTHERN CALIFORNIA; SINGAPORE NATIONAL EYE CENTER					2024-02-18		10.1167/iovs.06-1120	ARTICLE				SMITHS@CCF.ORG	3688				199VF	ULTRASOUND BIOMICROSCOPY; GONIOMETRY; EYES	8	INVEST OPHTH VIS SCI	INVEST. OPHTHALMOL. VIS. SCI.	ENGLISH	13		FRIEDMAN, DAVID/0000-0002-2055-5797	12300 TWINBROOK PARKWAY, ROCKVILLE, MD 20852-1606 USA	AUG	6	ROCKVILLE	17652739	J	ASSOC RESEARCH VISION OPHTHALMOLOGY INC	2007	TIN, AUNG/B-6521-2009	SMITH, SD (CORRESPONDING AUTHOR), CLEVELAND CLIN, COLE EYE INST, 9500 EUCLID AVE,I-32, CLEVELAND, OH 44195 USA.	OPHTHALMOLOGY			0146-0404	INVESTIGATIVE OPHTHALMOLOGY & VISUAL SCIENCE
BECK AD;FREEDMAN SF;NIZAM A;LAMBERT SR;INFANT APHAKIA TREATMENT STUDY GRP	BECK, ALLEN D.;FREEDMAN, SHARON F.;NIZAM, AZHAR;LAMBERT, SCOTT R.;INFANT APHAKIA TREATMENT STUDY GRP	AZAD RV, 2014, INDIAN J OPHTHALMOL, V62, P163, DOI 10.4103/0301-4738.116487;BECK AD, 2012, ARCH OPHTHALMOL-CHIC, V130, P300, DOI 10.1001/ARCHOPHTHALMOL.2011.347;CHEN TC, 2006, J PEDIAT OPHTH STRAB, V43, P274, DOI 10.3928/01913913-20060901-01;DANIEL MC, 2019, OPHTHALMOLOGY, V126, P233, DOI 10.1016/J.OPHTHA.2018.08.031;FREEDMAN SF, 2021, JAMA OPHTHALMOL, V139, P165, DOI 10.1001/JAMAOPHTHALMOL.2020.…	PURPOSE TO CORRELATE THE DIAGNOSIS OF GLAUCOMA AMONG CHILDREN IN THE INFANT APHAKIA TREATMENT STUDY (IATS) BY AGE 10 YEARS WITH ANTERIOR SEGMENT OPTICAL COHERENCE TOMOGRAPHY (AS-OCT) FINDINGS. METHODS A MULTICENTER RANDOMIZED CONTROLLED TRIAL OF 114 INFANTS WITH UNILATERAL CONGENITAL CATARACT WHO WERE 1-6 MONTHS OF AGE AT SURGERY. DATA ON LONG-TERM GLAUCOMA-RELATED STATUS AND OUTCOMES WERE COLLEC…				E1	EMORY UNIV, DEPT OPHTHALMOL, SCH MED, ATLANTA, GA USA.; DUKE UNIV, DEPT OPHTHALMOL, MED CTR, DURHAM, NC USA.; EMORY UNIV, DEPT BIOSTAT & BIOINFORMAT, ROLLINS SCH PUBL HLTH, ATLANTA, GA USA.; STANFORD UNIV, DEPT OPHTHALMOL, STANFORD, CA USA.; EMORY UNIV, DEPT OPHTHALMOL, 1365 B CLIFTON RD,NE, ATLANTA, GA 30322 USA.;	EMORY UNIVERSITY; DUKE UNIVERSITY; EMORY UNIVERSITY; ROLLINS SCHOOL PUBLIC HEALTH; STANFORD UNIVERSITY; EMORY UNIVERSITY					2024-02-18		10.1016/j.jaapos.2022.05.016	ARTICLE			1528-3933	ABECK@EMORY.EDU	E6		NATIONAL INSTITUTES OF HEALTH [U10EY13272, U10EY013287]; NIH DEPARTMENTAL CORE GRANT [EY06360]	SUPPORTED BY NATIONAL INSTITUTES OF HEALTH GRANTS U10EY13272 AND U10EY013287 AND IN PART BY NIH DEPARTMENTAL CORE GRANT EY06360 AND RESEARCH TO PREVENT BLINDNESS INC, NEW YORK, NEW YORK. THE FUNDERS HAD NO ROLE IN THE DESIGN AND CONDUCT OF THE STUDY; COLLECTION, MANAGEMENT, ANALYSIS, OR INTERPRETATION OF THE DATA; PREPARATION, REVIEW, OR APPROVAL OF THE MANUSCRIPT; OR DECISION TO SUBMIT THE MANUS…	9N3BO	CONGENITAL CATARACT; ULTRASOUND BIOMICROSCOPY; ADVERSE EVENTS; GLAUCOMA; RISK; GONIOSCOPY; SURGERY	5	J AAPOS	J. AAPOS	ENGLISH	20			360 PARK AVENUE SOUTH, NEW YORK, NY 10010-1710 USA	OCT	6	NEW YORK	36122874	J	MOSBY-ELSEVIER	2022		BECK, AD (CORRESPONDING AUTHOR), EMORY UNIV, DEPT OPHTHALMOL, 1365 B CLIFTON RD,NE, ATLANTA, GA 30322 USA.	OPHTHALMOLOGY; PEDIATRICS			1091-8531	JOURNAL OF AAPOS
BRONIEK-KOWALIK K;DZIEZYC K;LITWIN T;CZLONKOWSKA A;SZAFLIK JP	BRONIEK-KOWALIK, KARINA;DZIEZYC, KAROLINA;LITWIN, TOMASZ;CZLONKOWSKA, ANNA;SZAFLIK, JACEK P.	ALA A, 2007, LANCET, V369, P397, DOI 10.1016/S0140-6736(07)60196-2;CERESARA G, 2014, OPHTHALMOLOGICA, V231, P147, DOI 10.1159/000355090;DEMIRKIRAN M, 1996, NEUROLOGY, V46, P1040, DOI 10.1212/WNL.46.4.1040;FERENCI P, 2007, GASTROENTEROLOGY, V132, P1294, DOI 10.1053/J.GASTRO.2007.02.057;FERENCI P, 2012, J HEPATOL, V56, P671, DOI 10.1016/J.JHEP.2011.11.007;FLEISCHER B., 1903, KLIN MONBL AUGENHEIL, V…	PURPOSE KAYSER-FLEISCHER RING PATHOGNOMONIC FOR WILSON DISEASE (WD) IS FORMED OF CORNEAL COPPER DEPOSITS PRESENT PREDOMINANTLY WITHIN THE ANTERIOR CHAMBER ANGLE AT THE SCHWALBE'S LINE. THE SLIT-LAMP ASSESSMENT COMMONLY USED AS A STANDARD OF CARE CANNOT DETECT THEM EARLY ENOUGH, AS THE ANGLE VIEW IS OBSCURED BY THE CORNEAL LIMBUS. THE AIM OF THE RESEARCH WAS TO EVALUATE THE ANTERIOR SEGMENT OPTICA…				E757	MED UNIV WARSAW, SPKSO OPHTHALM UNIV HOSP, WARSAW, POLAND.; INST PSYCHIAT & NEUROL, DEPT NEUROL 2, WARSAW, POLAND.; MED UNIV WARSAW, DEPT EXPT & CLIN PHARMACOL, WARSAW, POLAND.; MED UNIV WARSAW, DEPT OPHTHALMOL, WARSAW, POLAND.;	MEDICAL UNIVERSITY OF WARSAW; INSTITUTE OF PSYCHIATRY & NEUROLOGY; MEDICAL UNIVERSITY OF WARSAW; MEDICAL UNIVERSITY OF WARSAW					2024-02-18	ANTERIOR SEGMENT OPTICAL COHERENCE TOMOGRAPHY; COPPER DEPOSIT; KAYSER-FLEISCHER RING; WILSON DISEASE	10.1111/aos.14009	ARTICLE			1755-3768	KARINA.BRONIEK@GMAIL.COM	E760				IH9DK	DIAGNOSIS	5	ACTA OPHTHALMOL	ACTA OPHTHALMOL.	ENGLISH	27	BRONZE	LITWIN, TOMASZ/0000-0003-2670-9651; SZAFLIK, JACEK/0000-0001-9100-0847	111 RIVER ST, HOBOKEN 07030-5774, NJ USA	AUG	4	HOBOKEN	30635971	J	WILEY	2019	LITWIN, TOMASZ/IST-7668-2023	BRONIEK-KOWALIK, K (CORRESPONDING AUTHOR), SAMODZIELNY PUBLI KLIN SZPITAL OKULISTY, SIERAKOWSKIEGO 13, PL-03709 WARSAW, POLAND.	OPHTHALMOLOGY			1755-375X	ACTA OPHTHALMOLOGICA
KARA N;BAZ O;ALTINKAYNAK H;ALTAN C;DEMIROK A	KARA, NECIP;BAZ, OKKES;ALTINKAYNAK, HASAN;ALTAN, CIGDEM;DEMIROK, AHMET	AMERASINGHE N, 2009, INVEST OPHTH VIS SCI, V50, P2626, DOI 10.1167/IOVS.08-2582;BROCKHURST R J, 1974, TRANS AM OPHTHALMOL SOC, V72, P371;BROCKHURST RJ, 1975, ARCH OPHTHALMOL-CHIC, V93, P583;BROCKHURST RJ, 1990, ARCH OPHTHALMOL-CHIC, V108, P965, DOI 10.1001/ARCHOPHT.1990.01070090067041;BROCKHURST RJ, 1975, ARCH OPHTHALMOL-CHIC, V93, P1289, DOI 10.1001/ARCHOPHT.1975.01010020923001;BRUNO CHRISTINA A…	PURPOSE: TO QUANTITATIVELY ASSESS THE PARAMETERS OF ANTERIOR CHAMBER AND ANGLE DIMENSIONS BY ANTERIOR SEGMENT OPTICAL COHERENCE TOMOGRAPHY (AS-OCT) IN NANOPHTHALMOS. METHODS: IN THIS PROSPECTIVE, CROSS-SECTIONAL AND COMPARATIVE STUDY, 34 EYES OF 34 HEALTHY INDIVIDUALS (CONTROL GROUP) AND 37 EYES OF 37 PATIENTS WITH NANOPHTHALMOS (STUDY GROUP) WERE ENROLLED. A SINGLE EXPERIENCED OPHTHALMOLOGIST IM…				563	BEYOGLU EYE EDUC & RES HOSP, ISTANBUL, TURKEY.;	ISTANBUL PROF DR N RESAT BELGER BEYOGLU EYE TRAINING & RESEARCH HOSPITAL					2024-02-18	ANTERIOR CHAMBER ANGLE; ANTERIOR SEGMENT OPTICAL COHERENCE TOMOGRAPHY; NANOPHTHALMOS	10.3109/02713683.2013.774025	ARTICLE			1460-2202	DR.NECIPKARA@GMAIL.COM	568				117KL	CLOSURE GLAUCOMA; UVEAL EFFUSION; BIOMETRY; VIVO; AGE	5	CURR EYE RES	CURR. EYE RES.	ENGLISH	38		KARA, NECIP/0000-0001-8113-6206; DEMIROK, AHMET/0000-0001-8197-2458; ALTAN, CIGDEM AYSE/0000-0002-0908-6619;	530 WALNUT STREET, STE 850, PHILADELPHIA, PA 19106 USA	MAY	6	PHILADELPHIA	23470044	J	TAYLOR & FRANCIS INC	2013	KARA, NECIP/E-7142-2015; DEMIROK, AHMET/AAE-1713-2020; ALTAN, CIGDEM AYSE/AAL-2041-2020; ALTINKAYNAK, HASAN/V-6058-2017	KARA, N (CORRESPONDING AUTHOR), EYE EDUC & RES HOSP, KARTALTEPE MH AKIN SK AKIN APT 8-14 BAKIRKOY, ISTANBUL, TURKEY.	OPHTHALMOLOGY			0271-3683	CURRENT EYE RESEARCH
KHOR WB;SAKATA LM;FRIEDMAN DS;NARAYANASWAMY A;LAVANYA R;PERERA SA;AUNG T	KHOR, WEI-BOON;SAKATA, LISANDRO M.;FRIEDMAN, DAVID S.;NARAYANASWAMY, ARUN;LAVANYA, RAGHAVAN;PERERA, SHAMIRA A.;AUNG, TIN	GOLDSMITH JA, 2005, OPHTHALMOLOGY, V112, P238, DOI 10.1016/J.OPHTHA.2004.09.019;HE MG, 2006, INVEST OPHTH VIS SCI, V47, P4772, DOI 10.1167/IOVS.06-0309;KUNIMATSU S, 2005, OPHTHALMOLOGY, V112, P407, DOI 10.1016/J.OPHTHA.2004.10.026;LAVANYA R, 2008, OPHTHALMOLOGY, V115, P1720, DOI 10.1016/J.OPHTHA.2008.03.015;NOLAN WP, 2007, OPHTHALMOLOGY, V114, P33, DOI 10.1016/J.OPHTHA.2006.05.073;RADHAKRISHNAN S…	PURPOSE: TO EVALUATE DIFFERENT ANTERIOR SEGMENT-OPTICAL COHERENCE TOMOGRAPHY (AS-OCT) SCANNING PROTOCOLS FOR DETECTING EYES WITH ANGLE CLOSURE. METHODS: THIS CROSS-SECTIONAL STUDY ENROLLED 2104 SUBJECTS FROM A COMMUNITY CLINIC IN SINGAPORE. ALL PARTICIPANTS UNDERWENT AS-OCT IMAGING IN THE DARK (VISANTE, CARL-ZEISS, MEDITEC, DUBLIN, CA), AND GONIOSCOPY WITH A GOLDMANN 2-MIRROR AND A SUSSMAN LENS B…				365	SINGAPORE NATL EYE CTR, SINGAPORE EYE RES INST, SINGAPORE 168751, SINGAPORE.; NATL UNIV SINGAPORE, YONG LOO LIN SCH MED, SINGAPORE 117595, SINGAPORE.; UNIV FED PARANA, BR-80060000 CURITIBA, PARANA, BRAZIL.; JOHNS HOPKINS UNIV, WILMER EYE INST, BALTIMORE, MD 21218 USA.;	SINGAPORE NATIONAL EYE CENTER; NATIONAL UNIVERSITY OF SINGAPORE; NATIONAL UNIVERSITY OF SINGAPORE; UNIVERSIDADE FEDERAL DO PARANA; JOHNS HOPKINS UNIVERSITY; JOHNS HOPKINS MEDICINE					2024-02-18	ANGLE CLOSURE; ANTERIOR SEGMENT; OPTICAL COHERENCE TOMOGRAPHY; IMAGING; GLAUCOMA	10.1097/IJG.0b013e3181bf4dd5	ARTICLE			1536-481X	TIN11@PACIFIC.NET.SG	368		SINGHEALTH FOUNDATION, SINGAPORE; NATIONAL RESEARCH FOUNDATION, SINGAPORE; CARL ZEISS MEDITEC	SUPPORTED BY GRANTS FROM SINGHEALTH FOUNDATION, SINGAPORE AND NATIONAL RESEARCH FOUNDATION, SINGAPORE.; FINANCIAL DISCLOSURES: CARL ZEISS MEDITEC LOANED THE ANTERIOR SEGMENT OPTICAL COHERENCE TOMOGRAPHY FOR THE STUDY AND PROVIDED TECHNICAL SUPPORT. DR AUNG HAS RECEIVED FINANCIAL SUPPORT AND HONORARIA FOR TRAVEL TO CONFERENCES FROM CARL ZEISS MEDITEC.	639YM	GONIOSCOPY; CLOSURE; BIOMICROSCOPY; WIDTH; EYES	6	J GLAUCOMA	J. GLAUCOMA	ENGLISH	11		PERERA, SHAMIRA/0000-0002-1404-5096; FRIEDMAN, DAVID/0000-0002-2055-5797; KHOR, WEI BOON/0000-0001-5450-9863	TWO COMMERCE SQ, 2001 MARKET ST, PHILADELPHIA, PA 19103 USA	AUG	4	PHILADELPHIA	19855287	J	LIPPINCOTT WILLIAMS & WILKINS	2010	TIN, AUNG/B-6521-2009	AUNG, T (CORRESPONDING AUTHOR), SINGAPORE NATL EYE CTR, SINGAPORE EYE RES INST, 11 3RD HOSP AVE, SINGAPORE 168751, SINGAPORE.	OPHTHALMOLOGY			1057-0829	JOURNAL OF GLAUCOMA
ZHOU Q;WANG JM;GUO JM;HUANG ZW;DING MY;YUCHI M;ZHANG XM	ZHOU, QUAN;WANG, JUNMING;GUO, JINGMIN;HUANG, ZHIWEN;DING, MINGYUE;YUCHI, MING;ZHANG, XUMING	ANONYMOUS, 2018, 21 INT C MED IM COMP;ANONYMOUS, 2019, ABS190402874 CORR;ARDILA D, 2019, NAT MED, V25, P954, DOI 10.1038/S41591-019-0447-X;BERNARD O, 2018, IEEE T MED IMAGING, V37, P2514, DOI 10.1109/TMI.2018.2837502;CHEN ZX, 2020, INFORM SCIENCES, V541, P502, DOI 10.1016/J.INS.2020.06.072;CONSOLE JW, 2008, BRIT J OPHTHALMOL, V92, P1612, DOI 10.1136/BJO.2007.129932;DASH M, 2019, BIOMED SIGNAL PRO…	AS THE MAIN CAUSE OF IRREVERSIBLE VISUAL IMPAIRMENT, ANGLE-CLOSURE GLAUCOMA (ACG) CAN BE DETECTED WITH ANTERIOR SEGMENT OPTICAL COHERENCE TOMOGRAPHY (AS-OCT). THE AUTOMATIC CLASSIFICATION OF ANTERIOR CHAMBER ANGLES (ACA) INTO CLOSED ANGLE, NARROWED ANGLE AND OPEN ANGLE IN THE AS-OCT IMAGES IS HIGHLY SIGNIFICANT FOR UNDERSTANDING GLAUCOMA PROGRESSION. THE TRADITIONAL TECHNIQUES FOR IMAGE CLASSIFIC…	102686				HUAZHONG UNIV SCI & TECHNOL, COLL LIFE SCI & TECHNOL, DEPT BIOMED ENGN, MINIST EDUC,KEY LAB MOL BIOPHYS, WUHAN 430074, PEOPLES R CHINA.; HUAZHONG UNIV SCI & TECHNOL, TONGJI HOSP, TONGJI MED COLL, DEPT OPHTHALMOL, WUHAN 430074, PEOPLES R CHINA.;	HUAZHONG UNIVERSITY OF SCIENCE & TECHNOLOGY; HUAZHONG UNIVERSITY OF SCIENCE & TECHNOLOGY					2024-02-18	ANTERIOR CHAMBER ANGLE CLASSIFICATION; AS-OCT; DEEP LEARNING; PYRAMIDAL CONVOLUTION; HYBRID ATTENTION	10.1016/j.bspc.2021.102686	ARTICLE; EARLY ACCESS	MAY 2021		1746-8108	ZHOUDACHUAN@HUST.EDU.CN; EYEDRWJM@163.COM; GJM696@163.COM; ZHIWEN_HUANG@HUST.EDU.CN; MYDING@HUST.EDU.CN; M.YUCHI@HUST.EDU.CN; ZXMBOSHI@HUST.EDU.CN			NATIONAL KEY RESEARCH ANDDEVELOPMENT PROGRAM OF CHINA [2017YFB1303100]; NATIONAL NATURAL SCIENCE FOUNDATION OF CHINA (NSFC) [61871440]	THIS WORK WAS PARTLY SUPPORTED BY THE NATIONAL KEY RESEARCH ANDDEVELOPMENT PROGRAM OF CHINA (GRANT NO.: 2017YFB1303100) AND THE NATIONAL NATURAL SCIENCE FOUNDATION OF CHINA (NSFC) (GRANT NO.: 61871440) .	TF0AO	DEEP LEARNING FRAMEWORK		BIOMED SIGNAL PROCES	BIOMED. SIGNAL PROCESS. CONTROL	ENGLISH	42		YUCHI, MING/0000-0003-1506-0631	THE BOULEVARD, LANGFORD LANE, KIDLINGTON, OXFORD OX5 1GB, OXON, ENGLAND	2021 JUL	12	OXFORD		J	ELSEVIER SCI LTD	2021	YUCHI, MING/AHB-9595-2022; ZHANG, XUMING/AAS-7462-2020; WANG, JUNMING/AAD-9636-2019	ZHANG, XM (CORRESPONDING AUTHOR), HUAZHONG UNIV SCI & TECHNOL, COLL LIFE SCI & TECHNOL, DEPT BIOMED ENGN, MINIST EDUC,KEY LAB MOL BIOPHYS, WUHAN 430074, PEOPLES R CHINA.	ENGINEERING			1746-8094	BIOMEDICAL SIGNAL PROCESSING AND CONTROL
NAKANO N;HANGAI M;NAKANISHI H;INOUE R;UNOKI N;HIROSE F;OJIMA T;YOSHIMURA N	NAKANO, NORIKO;HANGAI, MASANORI;NAKANISHI, HIDEO;INOUE, RYO;UNOKI, NORIYUKI;HIROSE, FUMITAKA;OJIMA, TOMONARI;YOSHIMURA, NAGAHISA	ADDICKS EM, 1983, ARCH OPHTHALMOL-CHIC, V101, P795;AVITABILE T., 1998, OPHTHALMOLOGICA, V212, P17, DOI 10.1159/000055414;BABIGHIAN S, 2006, ACTA OPHTHALMOL SCAN, V84, P270, DOI 10.1111/J.1600-0420.2006.00616.X;CANTOR LB, 2003, J GLAUCOMA, V12, P266, DOI 10.1097/00061198-200306000-00015;CIANCAGLINI M, 2008, J GLAUCOMA, V17, P308, DOI 10.1097/IJG.0B013E31815C3A19;GUTHOFF R, 2006, J GLAUCOMA, V15, P…	TO CORRELATE THE CROSS-SECTIONAL FEATURES OF FILTERING BLEBS ON ANTERIOR-SEGMENT OPTICAL COHERENCE TOMOGRAPHY (AS-OCT) 2 WEEKS AFTER TRABECULECTOMY WITH BLEB FUNCTION AT 6 MONTHS. FORTY-EIGHT EYES FOLLOWED FOR 6 MONTHS OR MORE AFTER TRABECULECTOMY WITH MITOMYCIN C WERE INCLUDED. BLEB WALL REFLECTIVITY OF DEVELOPING BLEBS ON AS-OCT 2 WEEKS POSTOPERATIVELY WAS CORRELATED WITH MATURE BLEB FUNCTION A…				1173	KYOTO UNIV, GRAD SCH MED, DEPT OPHTHALMOL & VISUAL SCI, SAKYO KU, KYOTO 6068507, JAPAN.;	KYOTO UNIVERSITY					2024-02-18	ANTERIOR-SEGMENT OPTICAL COHERENCE TOMOGRAPHY; BLEB; TRABECULECTOMY	10.1007/s00417-010-1311-3	ARTICLE				HANGAI@KUHP.KYOTO-U.AC.JP	1182		JAPAN SOCIETY FOR THE PROMOTION OF SCIENCE (JSPS) [20592038]; GRANTS-IN-AID FOR SCIENTIFIC RESEARCH [20592038] FUNDING SOURCE: KAKEN	SUPPORTED IN PART BY A GRANT-IN-AID FOR SCIENTIFIC RESEARCH (20592038) FROM THE JAPAN SOCIETY FOR THE PROMOTION OF SCIENCE (JSPS).	622RO	VIVO CONFOCAL MICROSCOPY; FILTERING BLEBS; ULTRASOUND BIOMICROSCOPY; MITOMYCIN-C; GLAUCOMATOUS EYES; SURGERY; APPEARANCE	8	GRAEF ARCH CLIN EXP	GRAEFES ARCH. CLIN. EXP. OPHTHALMOL.	ENGLISH	27			233 SPRING ST, NEW YORK, NY 10013 USA	AUG	10	NEW YORK	20224953	J	SPRINGER	2010		HANGAI, M (CORRESPONDING AUTHOR), KYOTO UNIV, GRAD SCH MED, DEPT OPHTHALMOL & VISUAL SCI, SAKYO KU, 54 KAWAHARA CHO, KYOTO 6068507, JAPAN.	OPHTHALMOLOGY			0721-832X	GRAEFES ARCHIVE FOR CLINICAL AND EXPERIMENTAL OPHTHALMOLOGY
GOLEZ E;LATINA M	GOLEZ, ERNESTO, III;LATINA, MARK	AVITABILE T., 1998, OPHTHALMOLOGICA, V212, P17, DOI 10.1159/000055414;AZUARA-BLANCO A, 1998, SURV OPHTHALMOL, V43, P93, DOI 10.1016/S0039-6257(98)00025-3;BURGANSKY-ELIASH Z, 2008, OPHTHAL SURG LAS IM, V39, P155, DOI 10.3928/15428877-20080301-03;CAIRNS JE, 1968, AM J OPHTHALMOL, V66, P673, DOI 10.1016/0002-9394(68)91288-9;CAPOROSSI A., 2009, INTERNATIONAL OPHTHALMOLOGY, V29, P359, DOI 10.1007/S107…	EVALUATION OF PATIENTS AFTER TRABECULECTOMY CAN BE AIDED BY THE USE OF ANTERIOR SEGMENT IMAGING. TWO COMMONLY USED FORMS OF IMAGING ARE ULTRASOUND BIOMICROSCOPY (UBM) AND OPTICAL COHERENCE TOMOGRAPHY (OCT). BOTH MODALITIES CAN BE USED TO ASSESS BLEB MORPHOLOGY AND HOW IT AFFECTS TREATMENT OUTCOME, MEASURE ANTERIOR CHAMBER BIOMETRY, IDENTIFY THE PRESENCE OF SUPRACILIOCHOROIDAL FLUID, CYCLODIALYSIS…				155	MASSACHUSETTS EYE & EAR INFIRM, BOSTON, MA 02114 USA.;	HARVARD UNIVERSITY; MASSACHUSETTS EYE & EAR INFIRMARY					2024-02-18	ANTERIOR SEGMENT OPTICAL COHERENCE TOMOGRAPHY; EYE; GLAUCOMA; ULTRASOUND BIOMICROSCOPY	10.3109/08820538.2012.707275	REVIEW			1744-5205	DOCERNIE3G@HOTMAIL.COM	159				041SD	OPTICAL COHERENCE TOMOGRAPHY; FILTERING BLEBS; ULTRASOUND BIOMICROSCOPY; SUPRACILIOCHOROIDAL FLUID; MALIGNANT GLAUCOMA; EYES; DIAGNOSIS; SURGERY	5-6	SEMIN OPHTHALMOL	SEMIN. OPHTHALMOL.	ENGLISH	49			530 WALNUT STREET, STE 850, PHILADELPHIA, PA 19106 USA	SEP-NOV	5	PHILADELPHIA	23163270	J	TAYLOR & FRANCIS INC	2012		GOLEZ, E (CORRESPONDING AUTHOR), MASSACHUSETTS EYE & EAR INFIRM, 20 PONDMEADOW DR,SUITE 203, READING, MA 01867 USA.	OPHTHALMOLOGY			0882-0538	SEMINARS IN OPHTHALMOLOGY
PANARELLI JF;KO A;SIDOTI PA;GARCIA JP;BANITT MR	PANARELLI, JOSEPH F.;KO, ANNE;SIDOTI, PAUL A.;GARCIA, JULIAN P.;BANITT, MICHAEL R.	ALDAVE AJ, 2009, OPHTHALMOLOGY, V116, P640, DOI 10.1016/J.OPHTHA.2008.12.058;AQUAVELLA JV, 2005, AM J OPHTHALMOL, V140, P1032, DOI 10.1016/J.AJO.2005.06.041;BRADLEY JC, 2009, CORNEA, V28, P321, DOI 10.1097/ICO.0B013E31818B8BFA;CHEW HF, 2009, CORNEA, V28, P989, DOI 10.1097/ICO.0B013E3181A186DC;DOHLMAN CLAES H., 2002, CLAO JOURNAL, V28, P72;GARCIA JPS, 2008, CORNEA, V27, P180, DOI 10.1097/ICO.0B013…	PURPOSE:TO EVALUATE CHANGES IN THE ANTERIOR CHAMBER ANGLE AFTER BOSTON KERATOPROSTHESIS (KPRO) PLACEMENT.PATIENTS/METHODS:TEN PATIENTS WERE SERIALLY IMAGED WITH ANTERIOR SEGMENT OPTICAL COHERENCE TOMOGRAPHY AFTER BOSTON KPRO SURGERY. ANGLES WERE JUDGED TO BE OPEN OR CLOSED IN THE HORIZONTAL AXIS.RESULTS:SEVEN OF 10 PATIENTS HAD OPEN ANGLES BEFORE KPRO PLACEMENT. WITHIN 4 MONTHS, 4 OF 7 PATIENTS D…				725	NEW YORK EYE & EAR INFIRM, DEPT OPHTHALMOL, NEW YORK, NY 10003 USA.; NEW YORK MED COLL, NEW YORK, NY USA.; UNIV MIAMI, MILLER SCH MED, BASCOM PALMER EYE INST, MIAMI, FL 33136 USA.;	NEW YORK EYE & EAR INFIRMARY OF MOUNT SINAI; NEW YORK MEDICAL COLLEGE; BASCOM PALMER EYE INSTITUTE; UNIVERSITY OF MIAMI					2024-02-18	ANGLE CLOSURE GLAUCOMA; OPTICAL COHERENCE TOMOGRAPHY; KERATOPROSTHESIS	10.1097/IJG.0b013e318259b2fc	ARTICLE			1536-481X	MBANITT@MED.MIAMI.EDU	729				272JE	TYPE-1 KERATOPROSTHESIS; GLAUCOMA	9	J GLAUCOMA	J. GLAUCOMA	ENGLISH	15			530 WALNUT ST, PHILADELPHIA, PA 19106-3621 USA	DEC	5	PHILADELPHIA	22595935	J	LIPPINCOTT WILLIAMS & WILKINS	2013		BANITT, MR (CORRESPONDING AUTHOR), 900 NW 17TH ST, MIAMI, FL 33136 USA.	OPHTHALMOLOGY			1057-0829	JOURNAL OF GLAUCOMA
WATANABE-KITAMURA F;INOUE T;KOJIMA S;NAKASHIMA KI;FUKUSHIMA A;TANIHARA H	WATANABE-KITAMURA, FUMIKA;INOUE, TOSHIHIRO;KOJIMA, SACHI;NAKASHIMA, KEI-ICHI;FUKUSHIMA, AYAKO;TANIHARA, HIDENOBU	CIANCAGLINI M, 2008, J GLAUCOMA, V17, P308, DOI 10.1097/IJG.0B013E31815C3A19;GOLEZ E, 2012, SEMIN OPHTHALMOL, V27, P155, DOI 10.3109/08820538.2012.707275;HAMANAKA T, 2013, INVEST OPHTH VIS SCI, V54, P6536, DOI 10.1167/IOVS.13-12439;INOUE T, 2012, INVEST OPHTH VIS SCI, V53, P8288, DOI 10.1167/IOVS.12-10941;KAWANA K, 2009, OPHTHALMOLOGY, V116, P848, DOI 10.1016/J.OPHTHA.2008.11.019;KOJIMA S, 2015, …	PURPOSE. WE USED THREE-DIMENSIONAL ANTERIOR-SEGMENT OPTICAL COHERENCE TOMOGRAPHY (3D AS-OCT) TO EVALUATE TIME-DEPENDENT POSTTRABECULECTOMY CHANGES IN BLEB WALL VOLUME AND INTENSITY. METHODS. THIS PROSPECTIVE OBSERVATIONAL STUDY INCLUDED PATIENTS WITH OPEN-ANGLE GLAUCOMA WHO UNDERWENT FORNIX-BASED TRABECULECTOMY BETWEEN JANUARY 2012 AND OCTOBER 2012. TWENTY-NINE EYES MET INCLUSION CRITERIA, AND TH…	8261364				KUMAMOTO UNIV, FAC LIFE SCI, DEPT OPHTHALMOL, KUMAMOTO, JAPAN.;	KUMAMOTO UNIVERSITY					2024-02-18		10.1155/2017/8261364	ARTICLE			2090-0058	NOEL@DA2.SO-NET.NE.JP			JSPS KAKENHI [26462664]; GRANTS-IN-AID FOR SCIENTIFIC RESEARCH [26462664, 17K11458, 17H04351] FUNDING SOURCE: KAKEN	THIS WORK WAS SUPPORTED BY JSPS KAKENHI GRANT NO. 26462664.	FG5FS	OPTICAL COHERENCE TOMOGRAPHY; FILTERING BLEBS		J OPHTHALMOL	J. OPHTHALMOL.	ENGLISH	15	GREEN SUBMITTED, GREEN PUBLISHED, GOLD	INOUE, TOSHIHIRO/0000-0003-3769-7609	ADAM HOUSE, 3RD FLR, 1 FITZROY SQ, LONDON, W1T 5HF, ENGLAND		7	LONDON	28948046	J	HINDAWI LTD	2017		INOUE, T (CORRESPONDING AUTHOR), KUMAMOTO UNIV, FAC LIFE SCI, DEPT OPHTHALMOL, KUMAMOTO, JAPAN.	OPHTHALMOLOGY			2090-004X	JOURNAL OF OPHTHALMOLOGY
HEISLER M;QUONG WL;LEE S;HAN S;BEG MF;SARUNIC MV;MACKENZIE PJ	HEISLER, MORGAN;QUONG, WHITNEY L.;LEE, SIEUN;HAN, SHERRY;BEG, MIRZA F.;SARUNIC, MARINKO V.;MACKENZIE, PAUL J.	EHA J, 2013, AM J OPHTHALMOL, V155, P864, DOI 10.1016/J.AJO.2012.12.004;GEDDE SJ, 2009, AM J OPHTHALMOL, V148, P670, DOI 10.1016/J.AJO.2009.06.018;JAMPEL HD, 2005, AM J OPHTHALMOL, V140, P16, DOI 10.1016/J.AJO.2005.02.013;JIAN YF, 2013, J BIOMED OPT, V18, DOI 10.1117/1.JBO.18.2.026002;LETARTRE L, 2009, CAN J OPHTHALMOL, V44, P567, DOI 10.3129/I09-123;LEUNG CKS, 2007, BRIT J OPHTHALMOL, V91, P340,…	PURPOSE: TO DEMONSTRATE THE UTILITY OF SWEPT-SOURCE ANTERIOR SEGMENT OPTICAL COHERENCE TOMOGRAPHY (SS-AS-OCT) IN GUIDING PLACEMENT OF TRANSCONJUNCTIVAL SUTURES IN HYPOTONOUS PATIENTS AFTER A TRABECULECTOMY. PATIENTS AND METHODS: THIS IS A LONGITUDINAL CASE SERIES OF 10 EYES FROM 10 PATIENTS WHO REQUIRED TRANSCONJUNCTIVAL SUTURES AFTER A TRABECULECTOMY. SS-AS-OCT WAS USED TO AID IN THE PLACEMENT O…				486	SIMON FRASER UNIV, SCH ENGN SCI, BURNABY, BC, CANADA.; UNIV BRITISH COLUMBIA, FAC MED, VANCOUVER, BC, CANADA.; UNIV BRITISH COLUMBIA, FAC SCI APPL, VANCOUVER, BC, CANADA.; UNIV BRITISH COLUMBIA, DEPT OPHTHALMOL & VISUAL SCI, VANCOUVER, BC, CANADA.;	SIMON FRASER UNIVERSITY; UNIVERSITY OF BRITISH COLUMBIA; UNIVERSITY OF BRITISH COLUMBIA; UNIVERSITY OF BRITISH COLUMBIA					2024-02-18	GLAUCOMA; OPTICAL COHERENCE TOMOGRAPHY; TRABECULECTOMY; TRANSCONJUNCTIVAL SUTURES	10.1097/IJG.0000000000000656	ARTICLE			1536-481X	MACKENZIE.P@GMAIL.COM	490		BRAIN CANADA; MICHAEL SMITH FOUNDATION FOR HEALTH RESEARCH; CANADIAN INSTITUTES OF HEALTH RESEARCH; NATURAL SCIENCES AND ENGINEERING RESEARCH COUNCIL	THE AUTHORS THANK BRAIN CANADA, THE MICHAEL SMITH FOUNDATION FOR HEALTH RESEARCH, THE CANADIAN INSTITUTES OF HEALTH RESEARCH, AND THE NATURAL SCIENCES AND ENGINEERING RESEARCH COUNCIL FOR THEIR SUPPORT.	ET7JY	SCLERAL FLAP; HYPOTONY; SURGERY	5	J GLAUCOMA	J. GLAUCOMA	ENGLISH	8		BEG, MOHD AMIN/0000-0002-8495-4738; SARUNIC, MARINKO/0000-0002-5636-9056; BEG, MIRZA FAISAL/0000-0001-6706-8630	TWO COMMERCE SQ, 2001 MARKET ST, PHILADELPHIA, PA 19103 USA	MAY	5	PHILADELPHIA	28263262	J	LIPPINCOTT WILLIAMS & WILKINS	2017	BEG, MOHD AMIN/K-3366-2013	MACKENZIE, PJ (CORRESPONDING AUTHOR), EYE CARE CTR, SECT D,2550 WILLOW ST, VANCOUVER, BC V5Z 3N9, CANADA.	OPHTHALMOLOGY			1057-0829	JOURNAL OF GLAUCOMA
KIM H;MOON S;KIM E;KIM J;LEE J	KIM, HWAYEONG;MOON, SANGWOO R.;KIM, EUNAH;KIM, JINMI;LEE, JIWOONG	ALLINGHAM R R., 2021, SHIELDS TEXTBOOK OF GLAUCOMA, V7;ANAND N, 2006, BRIT J OPHTHALMOL, V90, P175, DOI 10.1136/BJO.2005.077800;AVITABILE T., 1998, OPHTHALMOLOGICA, V212, P17, DOI 10.1159/000055414;CAIRNS JE, 1968, AM J OPHTHALMOL, V66, P673, DOI 10.1016/0002-9394(68)91288-9;CANTOR LB, 2003, J GLAUCOMA, V12, P266, DOI 10.1097/00061198-200306000-00015;DANGDA S, 2021, J GLAUCOMA, V30, P988, DOI 10.…	INTRODUCTIONLITTLE HAS BEEN KNOWN ABOUT THE INTRABLEB STRUCTURES ASSOCIATED WITH BLEB FUNCTION AFTER TRABECULECTOMY WITH AMNIOTIC MEMBRANE TRANSPLANTATION (AMT). THE AIM OF THIS STUDY IS TO ANALYZE THE CHARACTERISTICS OF INTRABLEB STRUCTURES USING ANTERIOR SEGMENT OPTICAL COHERENCE TOMOGRAPHY (AS-OCT) AFTER TRABECULECTOMY WITH AMT. METHODSA TOTAL OF 68 EYES OF 68 PATIENTS WITH PRIMARY OPEN-ANGLE …	E0285127				PUSAN NATL UNIV, COLL MED, DEPT OPHTHALMOL, BUSAN, SOUTH KOREA.; PUSAN NATL UNIV HOSP, BIOMED RES INST, BUSAN, SOUTH KOREA.; PUSAN NATL UNIV HOSP, BIOMED RES INST, CLIN TRIAL CTR, DEPT BIOSTAT, BUSAN, SOUTH KOREA.;	PUSAN NATIONAL UNIVERSITY; PUSAN NATIONAL UNIVERSITY; PUSAN NATIONAL UNIVERSITY HOSPITAL; PUSAN NATIONAL UNIVERSITY; PUSAN NATIONAL UNIVERSITY HOSPITAL					2024-02-18		10.1371/journal.pone.0285127	ARTICLE				ALERTLEE@NAVER.COM			PATIENT CENTERED CLINICAL RESEARCH COORDINATING CENTER - MINISTRY OF HEALTH & WELFARE, REPUBLIC OF KOREA [HI19C0481, HC19C0276]	WE WOULD LIKE TO THANK EDITAGE (WWW.EDITAGE.CO.KR) FOR THE ENGLISH LANGUAGE EDITING.	F8OR8	BLOOD-AQUEOUS BARRIER; OPEN-ANGLE GLAUCOMA; MITOMYCIN-C; FILTERING BLEBS; INTRAOCULAR-PRESSURE; PSEUDOPHAKIC EYES; OUTCOMES; SURGERY	5	PLOS ONE	PLOS ONE	ENGLISH	46	GREEN PUBLISHED, GOLD	LEE, JIWOONG/0000-0002-1053-612X; KIM, EUNAH/0000-0003-4026-3502; MOON, SANG WOO/0000-0003-0313-3928	1160 BATTERY STREET, STE 100, SAN FRANCISCO, CA 94111 USA	MAY 3	15	SAN FRANCISCO	37134078	J	PUBLIC LIBRARY SCIENCE	2023		LEE, J (CORRESPONDING AUTHOR), PUSAN NATL UNIV, COLL MED, DEPT OPHTHALMOL, BUSAN, SOUTH KOREA.; LEE, J (CORRESPONDING AUTHOR), PUSAN NATL UNIV HOSP, BIOMED RES INST, BUSAN, SOUTH KOREA.	SCIENCE & TECHNOLOGY - OTHER TOPICS			1932-6203	PLOS ONE
NAKAKURA S;NOGUCHI A;NOGUCHI S;HIROSE Y;NIIMI K;TABUCHI H;KIUCHI Y	NAKAKURA, SHUNSUKE;NOGUCHI, ASUKA;NOGUCHI, SANTARO;HIROSE, YUKA;NIIMI, KOJI;TABUCHI, HITOSHI;KIUCHI, YOSHIAKI	AKAGI T, 2016, JAMA OPHTHALMOL, V134, DOI 10.1001/JAMAOPHTHALMOL.2015.3674;CHUA J, 2009, CORNEA, V28, P243, DOI 10.1097/ICO.0B013E318188036D;FELDMAN R. M., 2013, COMPLICATIONS OF GLAUCOMA SURGERY;GEDDE SJ, 2007, AM J OPHTHALMOL, V143, P23, DOI 10.1016/J.AJO.2006.07.022;IMAMURA H, 2018, INT OPHTHALMOL, V38, P679, DOI 10.1007/S10792-017-0517-3;KIDDEE W, 2013, J GLAUCOMA, V22, P773, DOI 10.1097/IJG.…	WE REPORT A CASE OF GLAUCOMA IMPLANT TUBE LUMEN OBSTRUCTION VISUALIZED WITH ANTERIOR SEGMENT OPTICAL COHERENCE TOMOGRAPHY (ASOCT) AND PRESENT ITS SURGICAL MANAGEMENT. THE PATIENT WAS A 66-YEAR-OLD MAN WITH REFRACTORY GLAUCOMA ASSOCIATED WITH TRAUMATIC APHAKIA IN THE RIGHT EYE AFTER TRABECULECTOMY, SEVERAL BLEB NEEDLING PROCEDURES, AND SCLERAL FIXATION OF THE INTRAOCULAR LENS WITH PARS PLANA VITRE…				E64	SANEIKAI TSUKAZAKI HOSP, DEPT OPHTHALMOL, 68-1 ABOSHI WAKU, HIMEJI, HYOGO 6711227, JAPAN.; ISHINKAI NIIMI EYE CLIN, DEPT OPHTHALMOL, AKASHI, HYOGO, JAPAN.; HIROSHIMA UNIV, GRAD SCH BIOMED SCI, DEPT OPHTHALMOL & VISUAL SCI, HIGASHIHIROSHIMA, JAPAN.;	HIROSHIMA UNIVERSITY					2024-02-18	GLAUCOMA; TUBE OBSTRUCTION; BAERVELDT IMPLANT; ANTERIOR SEGMENT OPTICAL COHERENCE TOMOGRAPHY	10.1097/IJG.0000000000000872	ARTICLE			1536-481X	SHUNSUKENAKAKURA@YAHOO.CO.JP	E67		GRANTS-IN-AID FOR SCIENTIFIC RESEARCH [15K00438] FUNDING SOURCE: KAKEN		GB1IC	INSERTION; MUSCLES	3	J GLAUCOMA	J. GLAUCOMA	ENGLISH	13			TWO COMMERCE SQ, 2001 MARKET ST, PHILADELPHIA, PA 19103 USA	MAR	4	PHILADELPHIA	29329136	J	LIPPINCOTT WILLIAMS & WILKINS	2018		NAKAKURA, S (CORRESPONDING AUTHOR), SANEIKAI TSUKAZAKI HOSP, DEPT OPHTHALMOL, 68-1 ABOSHI WAKU, HIMEJI, HYOGO 6711227, JAPAN.	OPHTHALMOLOGY			1057-0829	JOURNAL OF GLAUCOMA
WERNER L;MICHELSON J;OLLERTON A;LEISHMAN L;BODNAR Z	WERNER, LILIANA;MICHELSON, JENNIFER;OLLERTON, ANDREW;LEISHMAN, LISA;BODNAR, ZACHARY	APPLE DJ, 2002, OPHTHALMOLOGY, V109, P1666, DOI 10.1016/S0161-6420(02)01122-3;DAHLE N, 2006, ARCH OPHTHALMOL-CHIC, V124, P1350, DOI 10.1001/ARCHOPHT.124.9.1350;FOOT L, 2004, AM J OPHTHALMOL, V137, P979, DOI 10.1016/J.AJO.2003.12.047;HALL RC, 2011, J CATARACT REFR SURG, V37, P544, DOI 10.1016/J.JCRS.2010.10.037;HAYMORE J, 2007, OPHTHALMOLOGY, V114, P1689, DOI 10.1016/J.OPHTHA.2006.12.024;KHOR WB, …	PURPOSE: TO EVALUATE THE USE OF ANTERIOR SEGMENT OPTICAL COHERENCE TOMOGRAPHY (AS-OCT) TO ASSESS POSTOPERATIVE INTRAOCULAR LENS (IOL) OPTIC CHANGES. SETTING: JOHN A. MORAN EYE CENTER, UNIVERSITY OF UTAH, SALT LAKE CITY, UTAH, USA. DESIGN: EXPERIMENTAL STUDY. METHODS: INTRAOCULAR LENSES EXPLANTED BECAUSE OF VARIOUS COMPLICATIONS WERE USED, INCLUDING POLY(METHYL METHACRYLATE) (PMMA) IOLS WITH SNOWF…				1077	UNIV UTAH, JOHN A MORAN EYE CTR, DEPT OPHTHALMOL & VISUAL SCI, SALT LAKE CITY, UT 84132 USA.;	UTAH SYSTEM OF HIGHER EDUCATION; UNIVERSITY OF UTAH					2024-02-18		10.1016/j.jcrs.2012.01.027	ARTICLE				LILIANA.WERNER@HSC.UTAH.EDU	1085		RESEARCH TO PREVENT BLINDNESS, INC., NEW YORK, NEW YORK, USA	SUPPORTED IN PART BY AN UNRESTRICTED GRANT FROM RESEARCH TO PREVENT BLINDNESS, INC., NEW YORK, NEW YORK, USA, TO THE DEPARTMENT OF OPHTHALMOLOGY AND VISUAL SCIENCES, JOHN A. MORAN EYE CENTER, UNIVERSITY OF UTAH.	955SA	CLINICOPATHOLOGICAL ANALYSIS; POLYMETHYL METHACRYLATE; SNOWFLAKE DEGENERATION; SURFACE CALCIFICATION; ASTEROID HYALOSIS; OPACIFICATION; THICKNESS	6	J CATARACT REFR SURG	J. CATARACT. REFRACT. SURG.	ENGLISH	22			360 PARK AVE SOUTH, NEW YORK, NY 10010-1710 USA	JUN	9	NEW YORK	22624909	J	ELSEVIER SCIENCE INC	2012		WERNER, L (CORRESPONDING AUTHOR), UNIV UTAH, JOHN A MORAN EYE CTR, DEPT OPHTHALMOL & VISUAL SCI, 65 MARIO CAPECCHI DR, SALT LAKE CITY, UT 84132 USA.	OPHTHALMOLOGY; SURGERY			0886-3350	JOURNAL OF CATARACT AND REFRACTIVE SURGERY
SHIN YU;KIM JH;CHO H;KIM DS;YI JH;HAN SW;SEONG M	SHIN, YONG UN;KIM, JI HONG;CHO, HEEYOON;KIM, DAE SUNG;YI, JOO-HARK;HAN, SANG-WOONG;SEONG, MINCHEOL	CECCHIN E, 1986, NEPHRON, V43, P73, DOI 10.1159/000183724;ÇELIKAY O, 2015, J OPHTHALMOL, V2015, DOI 10.1155/2015/528681;CHELALA E, 2015, CLIN OPHTHALMOL, V9, P109, DOI 10.2147/OPTH.S74481;CHONG KL, 2017, J GLAUCOMA, V26, PE37, DOI 10.1097/IJG.0000000000000542;DEMARCHI S, 1989, RENAL FAILURE, V11, P117, DOI 10.3109/08860228909066953;DEMIR MN, 2009, EUR J OPHTHALMOL, V19, P1034, DOI 10.1177/1120672…	PURPOSE. TO INVESTIGATE THE EFFECT OF HEMODIALYSIS (HD) ON THE ANTERIOR CHAMBER ANGLE BY ANTERIOR SEGMENT OPTICAL COHERENCE TOMOGRAPHY (ASOCT) AND OTHER OPHTHALMOLOGIC PARAMETERS IN PATIENTS WITH END-STAGE KIDNEY DISEASE (ESKD). METHODS. A PROSPECTIVE OBSERVATIONAL STUDY WAS PERFORMED ON 20 PATIENTS WHO UNDERWENT HD FOR ESKD. ANTERIOR CHAMBER ANGLE IMAGES WERE OBTAINED BY 16 MM LINE SCAN OF ASOCT…	2406547				HANYANG UNIV, DEPT OPHTHALMOL, COLL MED, SEOUL, SOUTH KOREA.; HANYANG UNIV, DEPT INTERNAL MED, DIV NEPHROL, COLL MED, SEOUL, SOUTH KOREA.;	HANYANG UNIVERSITY; HANYANG UNIVERSITY					2024-02-18		10.1155/2019/2406547	ARTICLE			2090-0058	CARDION@HANYANG.AC.KR; GODDNS76@HANMAIL.NET			BASIC SCIENCE RESEARCH PROGRAM THROUGH THE NATIONAL RESEARCH FOUNDATION OF KOREA - MINISTRY OF EDUCATION [NRF-2017R1D1A1B03030905, NRF-2017R1D1A1B03031934]	THE AUTHORS WOULD LIKE TO THANK BIOSTATISTICAL CONSULTING AND RESEARCH LAB, HANYANG UNIVERSITY, FOR ASSISTANCE WITH STATISTICAL ANALYSIS. THIS RESEARCH WAS SUPPORTED BY BASIC SCIENCE RESEARCH PROGRAM THROUGH THE NATIONAL RESEARCH FOUNDATION OF KOREA FUNDED BY THE MINISTRY OF EDUCATION (NRF-2017R1D1A1B03030905 AND NRF-2017R1D1A1B03031934).	IU0QG	CHRONIC-RENAL-FAILURE; INTRAOCULAR-PRESSURE; VISUAL-ACUITY; THICKNESS; PREVENTION		J OPHTHALMOL	J. OPHTHALMOL.	ENGLISH	28	GREEN PUBLISHED, GREEN SUBMITTED, GOLD	KIM, DEA SUNG/0000-0002-7134-2257; SEONG, MINCHEOL/0000-0001-7912-0096; HAN, SANG-WOONG/0000-0003-3658-7248; SHIN, YONG-UN/0000-0003-1251-8985	ADAM HOUSE, 3RD FLR, 1 FITZROY SQ, LONDON, W1T 5HF, ENGLAND	AUG 14	6	LONDON	31485341	J	HINDAWI LTD	2019	SHIN, YONG-UN/AAI-9824-2020; HAN, SANG-WOONG/Q-1458-2015; SHIN, YONG-UN/V-7668-2017	SEONG, M (CORRESPONDING AUTHOR), HANYANG UNIV, DEPT OPHTHALMOL, COLL MED, SEOUL, SOUTH KOREA.; HAN, SW (CORRESPONDING AUTHOR), HANYANG UNIV, DEPT INTERNAL MED, DIV NEPHROL, COLL MED, SEOUL, SOUTH KOREA.	OPHTHALMOLOGY			2090-004X	JOURNAL OF OPHTHALMOLOGY
LEE RY;KASUGA T;CUI QN;HUANG GF;WANG SY;LIN SC	LEE, ROLAND Y.;KASUGA, TOSHIMITSU;CUI, QI N.;HUANG, GUOFU;WANG, SOPHIA Y.;LIN, SHAN C.	AHMED IIK, 2002, J CATARACT REFR SURG, V28, P100, DOI 10.1016/S0886-3350(01)00994-4;ALLEN D, 2006, BMJ-BRIT MED J, V333, P128, DOI 10.1136/BMJ.333.7559.128;ALTAN C, 2004, J CATARACT REFR SURG, V30, P832, DOI 10.1016/J.JCRS.2003.08.023;BERDAHL JP, 2009, MIDDLE EAST AFR J OP, V16, P119, DOI 10.4103/0974-9233.56222;CHO YK, 2008, J CATARACT REFR SURG, V34, P1104, DOI 10.1016/J.JCRS.2008.03.023;CONGDO…	BACKGROUND TO DETERMINE THE ASSOCIATION BETWEEN ETHNICITY AND CHANGES IN INTRAOCULAR PRESSURE AND ANTERIOR SEGMENT BIOMETRIC PARAMETERS FOLLOWING CATARACT SURGERY BY PHACOEMULSIFICATION IN NONGLAUCOMATOUS SUBJECTS. DESIGN PROSPECTIVE CLINICAL COHORT STUDY. PARTICIPANTS CAUCASIAN AND ASIAN SUBJECTS. METHODS CUSTOMIZED SOFTWARE WAS USED TO CALCULATE PARAMETERS FROM ANTERIOR SEGMENT OPTICAL COHERENC…				442	UNIV CALIF SAN FRANCISCO, DEPT OPHTHALMOL, SAN FRANCISCO, CA 94143 USA.; JUNTENDO UNIV, SCH MED, DEPT OPHTHALMOL, TOKYO 113, JAPAN.; NANCHANG UNIV, DEPT OPHTHALMOL, NANCHANG, JIANGXI, PEOPLES R CHINA.;	UNIVERSITY OF CALIFORNIA SYSTEM; UNIVERSITY OF CALIFORNIA SAN FRANCISCO; JUNTENDO UNIVERSITY; NANCHANG UNIVERSITY					2024-02-18	ANTERIOR SEGMENT; CATARACT SURGERY; ETHNICITY; INTRAOCULAR PRESSURE; PHACOEMULSIFICATION	10.1111/ceo.12032	ARTICLE			1442-9071	LINS@VISION.UCSF.EDU	449		NIH-NEI [EY002162]; RESEARCH TO PREVENT BLINDNESS; THAT MAN MAY SEE, INC.	THIS STUDY WAS SUPPORTED BY NIH-NEI EY002162 - CORE GRANT FOR VISION RESEARCH, RESEARCH TO PREVENT BLINDNESS, AND THAT MAN MAY SEE, INC.	171LB	PRIMARY ANGLE-CLOSURE; OCULAR HYPERTENSION TREATMENT; CHAMBER ANGLE; UNEVENTFUL PHACOEMULSIFICATION; LENS IMPLANTATION; RANDOMIZED-TRIAL; NARROW ANGLES; GLAUCOMA; EYES; DEPTH	5	CLIN EXP OPHTHALMOL	CLIN. EXP. OPHTHALMOL.	ENGLISH	48		CUI, QI/0000-0002-5338-0401; CUI, QI/0000-0002-5338-0401; LEE, ROLAND/0000-0002-6351-3562; WANG, SOPHIA/0000-0003-0916-9403	111 RIVER ST, HOBOKEN 07030-5774, NJ USA	JUL	8	HOBOKEN	23146132	J	WILEY	2013	CUI, QI/AAQ-7761-2021; CUI, QI/AAU-7327-2020	LIN, SC (CORRESPONDING AUTHOR), UNIV CALIF SAN FRANCISCO, SCH MED, DEPT OPHTHALMOL, BOX 0730,10 KORET ST, SAN FRANCISCO, CA 94143 USA.	OPHTHALMOLOGY			1442-6404	CLINICAL AND EXPERIMENTAL OPHTHALMOLOGY
VAN ISSUM C;MAVRAKANAS N;SCHUTZ JS;SHAARAWY T	VAN ISSUM, CHRISTOPHER;MAVRAKANAS, NIKOLAOS;SCHUTZ, JAMES S.;SHAARAWY, TAREK	BANTA JT, 2001, AM J OPHTHALMOL, V132, P112, DOI 10.1016/S0002-9394(01)01013-3;CRAIG JE, 2004, AM J OPHTHALMOL, V137, P193, DOI 10.1016/S0002-9394(03)00774-8;DE SIMONE G, 2009, CHEM BIOL DRUG DES, V74, P317, DOI 10.1111/J.1747-0285.2009.00857.X;FRAUNFELDER FW, 2004, OPHTHALMOLOGY, V111, P109, DOI 10.1016/J.OPHTHA.2003.04.004;GRINBAUM A, 1993, ANN OPHTHALMOL, V25, P224;KRIEG PH, 1996, EYE, V10, P1…	PURPOSE. TO DISCUSS THE UNUSUAL FEATURES OF TOPIRAMATE-INDUCED ACUTE ANGLE CLOSURE GLAUCOMA, ITS PATHOPHYSIOLOGIC MECHANISMS, AND TREATMENT CONTROVERSIES, AND TO REPORT THE FIRST ANTERIOR SEGMENT OPTICAL COHERENCE TOMOGRAPHY (OCT) OF THIS CONDITION. METHODS. LITERATURE REVIEW AND CASE REPORT WITH OCT FINDINGS. RESULTS. TOPIRAMATE-INDUCED ANGLE CLOSURE IS USUALLY BILATERAL AND ASSOCIATED WITH ACUT…				404	UNIV HOSP GENEVA, DEPT OPHTHALMOL, GLAUCOMA SECT, CH-1211 GENEVA 14, SWITZERLAND.;	UNIVERSITY OF GENEVA					2024-02-18	ACUTE MYOPIA; ANTERIOR SEGMENT OCT; BILATERAL ANGLE CLOSURE; CILIOCHOROIDAL EFFUSION; TOPIRAMATE	10.5301/EJO.2010.5979	ARTICLE				TAREK.SHAARAWY@HCUGE.CH	409				807BH	OPTICAL COHERENCE TOMOGRAPHY; PERIPHERAL IRIDOPLASTY; ACUTE-ONSET; GLAUCOMA; MECHANISM	4	EUR J OPHTHALMOL	EUR. J. OPHTHALMOL.	ENGLISH	27			72/74 VIA FRIULI, 20135 MILAN, ITALY	JUL-AUG	6	MILAN	21058272	J	WICHTIG EDITORE	2011		SHAARAWY, T (CORRESPONDING AUTHOR), UNIV HOSP GENEVA, DEPT OPHTHALMOL, GLAUCOMA SECT, 22 ALCIDE JENTZER STR, CH-1211 GENEVA 14, SWITZERLAND.	OPHTHALMOLOGY			1120-6721	EUROPEAN JOURNAL OF OPHTHALMOLOGY
KAN JTC;BETZLER BK;LIM SY;ANG BCH	KAN, JOHN TSIA-CHUEN;BETZLER, BJORN KAIJUN;LIM, SHENG YANG;ANG, BRYAN CHIN HOU	ADDICKS EM, 1983, ARCH OPHTHALMOL-CHIC, V101, P795;AHMED SF, 2018, GRAEF ARCH CLIN EXP, V256, P1703, DOI 10.1007/S00417-018-4023-8;ANG BCH, 2020, EYE, V34, P168, DOI 10.1038/S41433-019-0689-3;ANSARI E, 2017, OPHTHALMOL THER, V6, P233, DOI 10.1007/S40123-017-0098-2;ARRIOLA-VILLALOBOS P, 2016, J OPHTHALMOL, V2016, DOI 10.1155/2016/1056573;AU J, 2015, CORNEA, V34, P1039, DOI 10.1097/ICO.000000000000…	MINIMALLY INVASIVE GLAUCOMA SURGERY (MIGS) HAS GROWN IN POPULARITY OVER THE PAST DECADE. THIS SYSTEMATIC REVIEW EXPLORES THE PERI-OPERATIVE AND INTRAOPERATIVE APPLICATION OF ANTERIOR SEGMENT IMAGING TO MAXIMIZE THE EFFICACY AND SAFETY OF MIGS. A REVIEW OF THE PUBMED, EMBASE AND CINAHL DATABASES WAS CONDUCTED, WITH INCLUSION CRITERIA RESTRICTED TO MIGS THAT HAD RECEIVED UNITED STATES FOOD AND DRUG…				E617	NATL HEALTHCARE GRP EYE INST, TAN TOCK SENG HOSP, DEPT OPHTHALMOL, 11 JLN TAN TOCK SENG, SINGAPORE 308433, SINGAPORE.; NATL UNIV SINGAPORE, YONG LOO LIN SCH MED, SINGAPORE, SINGAPORE.; NATL HEALTHCARE GRP EYE INST, DEPT OPHTHALMOL, WOODLANDS HLTH CAMPUS, SINGAPORE, SINGAPORE.;	TAN TOCK SENG HOSPITAL; NATIONAL UNIVERSITY OF SINGAPORE					2024-02-18	GLAUCOMA; IMAGING; MINIMALLY INVASIVE GLAUCOMA SURGERY; SYSTEMATIC REVIEW	10.1111/aos.14962	REVIEW; EARLY ACCESS	JUL 2021		1755-3768	DRBRYANANG@GMAIL.COM	E634		GLAUKOS CORPORATION; ALLERGAN PLC; SANTEN PHARMACEUTICAL CO., LTD	DR BRYAN ANG HAS PREVIOUSLY RECEIVED FUNDING FROM GLAUKOS CORPORATION (HONORARIA, TRAVEL, RESEARCH), ALLERGAN PLC (HONORARIA, TRAVEL, RESEARCH) AND SANTEN PHARMACEUTICAL CO., LTD (HONORARIA, TRAVEL). HE HAS NOT RECEIVED FUNDING FOR HIS WORK IN THIS PUBLICATION. ALL OTHER AUTHORS DECLARE NO CONFLICT OF INTEREST OR FUNDING REGARDING THE PUBLICATION OF THIS PAPER.	0L1ID	OPTICAL COHERENCE TOMOGRAPHY; OPEN-ANGLE GLAUCOMA; FILTERING BLEBS; TRABECULAR MESHWORK; CATARACT-EXTRACTION; TRABECTOME; ISTENT; STENT; IDENTIFICATION; MANAGEMENT	3	ACTA OPHTHALMOL	ACTA OPHTHALMOL.	ENGLISH	85		BETZLER, BJORN/0000-0002-4843-7514	111 RIVER ST, HOBOKEN 07030-5774, NJ USA	2022 MAY	18	HOBOKEN	34250742	J	WILEY	2022		ANG, BCH (CORRESPONDING AUTHOR), NATL HEALTHCARE GRP EYE INST, TAN TOCK SENG HOSP, DEPT OPHTHALMOL, 11 JLN TAN TOCK SENG, SINGAPORE 308433, SINGAPORE.	OPHTHALMOLOGY			1755-375X	ACTA OPHTHALMOLOGICA
ABDEEN W;ESMAEL AF;GAWDAT G;EL-FAYOUMI D	ABDEEN, WEAM;ESMAEL, AMANNE F.;GAWDAT, GHADA;EL-FAYOUMI, DINA	AHMED IIK, 2009, J CURR GLAUCOMA PRAC, V3, P14, DOI 10.5005/JP-JOURNALS-10008-1004;BARKAN O, 1953, AM J OPHTHALMOL, V36, P1523, DOI 10.1016/0002-9394(53)91780-2;CAUDURO RS, 2012, J OPHTHALMOL, V2012, DOI 10.1155/2012/313120;CHANG TC, 2013, J OPHTHALMOL, V2013, DOI 10.1155/2013/612708;DELUISE VP, 1983, SURV OPHTHALMOL, V28, P1, DOI 10.1016/0039-6257(83)90174-1;EL SHAKANKIRI NM, 2009, J CATARACT RE…	PURPOSE TO DESCRIBE ANTERIOR CHAMBER ANGLE (ACA) STRUCTURES AND PARAMETERS IN PRIMARY CONGENITAL GLAUCOMA (PCG) AND NORMAL INFANT EYES, USING HAND-HELD ANTERIOR SEGMENT OPTICAL COHERENCE TOMOGRAPHY (HH AS-OCT), AS AN IN-OFFICE, NON-CONTACT TECHNIQUE. METHODS NORMAL AND PCG-INFANTS <24 MONTHS WERE EXAMINED, USING HH AS-OCT (RTVUE RT- 100, OPTOVUE INC., FREMONT, CA). SEDATION WAS NOT REQUIRED. CORN…				1238	MINIST HLTH EGYPT, OPHTHALMOL DEPT, CAIRO, EGYPT.; CAIRO UNIV, FAC MED, OPHTHALMOL DEPT, CAIRO, EGYPT.;	EGYPTIAN KNOWLEDGE BANK (EKB); MINISTRY OF HEALTH & POPULATION - EGYPT; EGYPTIAN KNOWLEDGE BANK (EKB); CAIRO UNIVERSITY					2024-02-18		10.1038/s41433-021-01583-1	ARTICLE; EARLY ACCESS	JUN 2021		1476-5454	D_ELFAYOUMI@YAHOO.COM	1245				1U7PW	OPTICAL COHERENCE TOMOGRAPHY; BIOMICROSCOPY; ULTRASOUND; EYES	6	EYE	EYE	ENGLISH	23	GREEN PUBLISHED, BRONZE	ELFAYOUMI, DINA/0000-0002-1785-0517	CAMPUS, 4 CRINAN ST, LONDON, N1 9XW, ENGLAND	2022 JUN	8	LONDON	34117386	J	SPRINGERNATURE	2022		EL-FAYOUMI, D (CORRESPONDING AUTHOR), CAIRO UNIV, FAC MED, OPHTHALMOL DEPT, CAIRO, EGYPT.	OPHTHALMOLOGY			0950-222X	EYE
KIM ST;SHIN GR;PARK JM	KIM, SEONG TAECK;SHIN, GWANG RAE;PARK, JI MAN	ALPAR J J, 1979, J AM INTRAOCUL IMPLANT SOC, V5, P33;CAIRNS JE, 1968, AM J OPHTHALMOL, V66, P673, DOI 10.1016/0002-9394(68)91288-9;CANTOR LB, 2003, J GLAUCOMA, V12, P266, DOI 10.1097/00061198-200306000-00015;CHOUDHRI SA, 1997, AM J OPHTHALMOL, V123, P554, DOI 10.1016/S0002-9394(14)70186-2;FINE HF, 2007, OPHTHALMOLOGY, V114, P1197, DOI 10.1016/J.OPHTHA.2007.02.020;FUJII GY, 2002, OPHTHALMOLOGY, V1…	BACKGROUND: WE INVESTIGATED THE OUTCOME OF 23-GAUGE TRANSCONJUNCTIVAL PARS PLANA VITRECTOMY (23G PPV) FOR THE TREATMENT OF VITREORETINAL DISORDER IN PATIENTS WITH PRIOR TRABECULECTOMY. METHODS: WE RETROSPECTIVELY REVIEWED MEDICAL RECORDS OF 23G PPV IN 11 EYES THAT HAD FUNCTIONING FILTERING BLEBS AFTER TRABECULECTOMY. THE MAIN OUTCOME MEASURES WERE THE VISUAL ACUITY, INTRAOCULAR PRESSURE (IOP) AND…	81				CHOSUN UNIV, SCH MED, DEPT OPHTHALMOL, GWANGJU 501717, SOUTH KOREA.;	CHOSUN UNIVERSITY					2024-02-18	TRABECULECTOMY; FILTERING BLEB; 23-GAUGE TRANSCONJUNCTIVAL VITRECTOMY	10.1186/s12886-015-0069-0	ARTICLE				S20AGE@HANMAIL.NET					CN4LY	AUTOLOGOUS BLOOD INJECTION; MITOMYCIN-C; GLAUCOMA SURGERY; LEAKING BLEBS; TRABECULECTOMY; SYSTEM		BMC OPHTHALMOL	BMC OPHTHALMOL.	ENGLISH	21	GOLD, GREEN PUBLISHED		CAMPUS, 4 CRINAN ST, LONDON N1 9XW, ENGLAND	JUL 24	7	LONDON	26204924	J	BMC	2015		KIM, ST (CORRESPONDING AUTHOR), CHOSUN UNIV, SCH MED, DEPT OPHTHALMOL, 365 PHILMUN DAERO ST, GWANGJU 501717, SOUTH KOREA.	OPHTHALMOLOGY			1471-2415	BMC OPHTHALMOLOGY
AU L;FENERTY C	AU, LEON;FENERTY, CECILIA	BAÏKOFF G, 2006, J CATARACT REFR SURG, V32, P1827, DOI 10.1016/J.JCRS.2006.08.025;FINE IH, 2007, J CATARACT REFR SURG, V33, P94, DOI 10.1016/J.JCRS.2006.09.016;LAI MM, 2006, J CATARACT REFR SURG, V32, P1860, DOI 10.1016/J.JCRS.2006.05.030;LEUNG CKS, 2007, BRIT J OPHTHALMOL, V91, P340, DOI 10.1136/BJO.2006.100321;LI HT, 2007, BRIT J OPHTHALMOL, V91, P1490, DOI 10.1136/BJO.2007.118901;LI Y, 2007, O…	ANTERIOR SEGMENT OPTICAL COHERENCE TOMOGRAPHY IS A RAPID, NON-CONTACT METHOD OF ASSESSING ANTERIOR SEGMENT STRUCTURES AND HAS HIGH RELIABILITY AND REPEATABILITY. THREE CASES ARE PRESENTED TO ILLUSTRATE HOW THIS TECHNOLOGY CAN BE USED IN THE ASSESSMENT AND MANAGEMENT OF A GLAUCOMA DRAINAGE IMPLANT. ANTERIOR SEGMENT OPTICAL COHERENCE TOMOGRAPHY PROVIDES HIGH-RESOLUTION IMAGES OF THE GLAUCOMA DRAINA…				164	MANCHESTER ROYAL EYE HOSP, MANCHESTER M13 9WH, LANCS, ENGLAND.;	MANCHESTER ROYAL EYE HOSPITAL					2024-02-18		10.3928/15428877-20080301-01	ARTICLE					166				277RC	REPRODUCIBILITY; TRABECULECTOMY; DEPTH; EYES	2	OPHTHAL SURG LAS IM	OPHTHALMIC SURG. LASERS IMAGING	ENGLISH	10			6900 GROVE RD, THOROFARE, NJ 08086 USA	MAR-APR	3	THOROFARE	18435346	J	SLACK INC	2008		AU, L (CORRESPONDING AUTHOR), MANCHESTER ROYAL EYE HOSP, OXFORD RD, MANCHESTER M13 9WH, LANCS, ENGLAND.	OPHTHALMOLOGY; SURGERY			1542-8877	OPHTHALMIC SURGERY LASERS & IMAGING
HAN S;SUNG KR;LEE KS;HONG JW	HAN, SEUNGBONG;SUNG, KYUNG RIM;LEE, KYOUNG SUB;HONG, JI WOOK	ALSAGOFF Z, 2000, OPHTHALMOLOGY, V107, P2300, DOI 10.1016/S0161-6420(00)00385-7;ANG LPK, 2000, OPHTHALMOLOGY, V107, P2092, DOI 10.1016/S0161-6420(00)00360-2;APTEL F, 2010, OPHTHALMOLOGY, V117, PC, DOI 10.1016/J.OPHTHA.2009.10.030;AUNG T, 2001, AM J OPHTHALMOL, V131, P7, DOI 10.1016/S0002-9394(00)00621-8;BAEK S, 2013, INVEST OPHTH VIS SCI, V54, P848, DOI 10.1167/IOVS.12-10391;CHOI JS, 2005, AM J O…	PURPOSE. TO INVESTIGATE THE EFFECT OF LASER PERIPHERAL IRIDOTOMY (LPI) IN SUBGROUPS OF ANGLE CLOSURE EYES BASED ON ANTERIOR SEGMENT OPTICAL COHERENCE TOMOGRAPHY (AS OCT)-DERIVED PARAMETERS. METHODS. ANGLE CLOSURE (PRIMARY ANGLE CLOSURE [PAC] OR PAC GLAUCOMA [PACG]) EYES WERE IMAGED USING AS OCT BEFORE AND 2 WEEKS AFTER LPI. A HIERARCHICAL CLUSTER ANALYSIS WAS PERFORMED USING AS OCT PARAMETERS OBT…					ASAN MED CTR, COLL MED, DEPT CLIN EPIDEMIOL & BIOSTAT, SEOUL, SOUTH KOREA.; UNIV ULSAN, COLL MED, ASAN MED CTR, DEPT OPHTHALMOL, SEOUL 138736, SOUTH KOREA.;	UNIVERSITY OF ULSAN; ASAN MEDICAL CENTER; UNIVERSITY OF ULSAN; ASAN MEDICAL CENTER					2024-02-18	GLAUCOMA; ANGLE CLOSURE; PUPILLARY BLOCK; LASER PERIPHERAL IRIDOTOMY; AS OCT	10.1167/iovs.14-14714	ARTICLE			1552-5783	SUNGEYE@GMAIL.COM					AT1ZS	CHAMBER ANGLE; GLAUCOMA; IRIS; CLASSIFICATION; ASSOCIATION; POPULATION; PREVALENCE; SUSPECTS; AREA; EYES	10	INVEST OPHTH VIS SCI	INVEST. OPHTHALMOL. VIS. SCI.	ENGLISH	36			12300 TWINBROOK PARKWAY, ROCKVILLE, MD 20852-1606 USA	OCT	7	ROCKVILLE	25249604	J	ASSOC RESEARCH VISION OPHTHALMOLOGY INC	2014		SUNG, KR (CORRESPONDING AUTHOR), UNIV ULSAN, COLL MED, ASAN MED CTR, DEPT OPHTHALMOL, 388-1 PUNGNAP 2 DONG, SEOUL 138736, SOUTH KOREA.	OPHTHALMOLOGY			0146-0404	INVESTIGATIVE OPHTHALMOLOGY & VISUAL SCIENCE
PAKULIENE G;ZIMARINAS K;NEDZELSKIENE I;SIESKY B;KUZMIENE L;HARRIS A;JANULEVICIENE I	PAKULIENE, GIEDRE;ZIMARINAS, KIRILAS;NEDZELSKIENE, IRENA;SIESKY, BRENT;KUZMIENE, LORETA;HARRIS, ALON;JANULEVICIENE, INGRIDA	AKMAN A, 2016, BRIT J OPHTHALMOL, V100, P1201, DOI 10.1136/BJOPHTHALMOL-2015-307779;BAEK SU, 2019, J KOREAN MED SCI, V34, DOI 10.3346/JKMS.2019.34.E47;BILAK S, 2015, OPTOMETRY VISION SCI, V92, P464, DOI 10.1097/OPX.0000000000000553;BULLIMORE MA, 2019, EYE CONTACT LENS, V45, P117, DOI 10.1097/ICL.0000000000000552;CAMPBELL P, 2015, OPHTHAL PHYSL OPT, V35, P170, DOI 10.1111/OPO.12200;CHEN PP, 2015, …	BACKGROUNDANTERIOR CHAMBER ANGLE ANATOMY IN PERSPECTIVE OF OCULAR BIOMETRY MAY BE THE KEY ELEMENT TO INTRAOCULAR PRESSURE (IOP) REDUCTION, ESPECIALLY IN GLAUCOMA PATIENTS. WE AIM TO INVESTIGATE ANTERIOR CHAMBER ANGLE AND BIOMETRICAL DATA PRIOR TO CATARACT SURGERY IN PATIENTS WITH AND WITHOUT GLAUCOMA COMORBIDITY.MATERIALS AND METHODSTHIS PROSPECTIVE COMPARATIVE CASE-CONTROL STUDY INCLUDED 62 SUBJ…	127				LITHUANIAN UNIV HLTH SCI, OPHTHALMOL DEPT, EIVENIU G 2, LT-50161 KAUNAS, LITHUANIA.; LITHUANIAN UNIV HLTH SCI, ODONTOL FAC, DEPT DENT & ORAL PATHOL, KAUNAS, LITHUANIA.; ICAHN SCH MED MT SINAI, NEW YORK, NY 10029 USA.;	LITHUANIAN UNIVERSITY OF HEALTH SCIENCES; LITHUANIAN UNIVERSITY OF HEALTH SCIENCES; ICAHN SCHOOL OF MEDICINE AT MOUNT SINAI					2024-02-18	ANTERIOR CHAMBER; CATARACT; GLAUCOMA; OPEN-ANGLE; NARROW-ANGLE; LENS-CRYSTALLINE	10.1186/s12886-021-01874-x	ARTICLE			1471-2415	GIEDREPAKULIENE@GMAIL.COM					QU3AK		1	BMC OPHTHALMOL	BMC OPHTHALMOL.	ENGLISH	32	GOLD, GREEN PUBLISHED	JANULEVICIENE, INGRIDA/0000-0002-2660-7922; PAKULIENE, GIEDRE/0000-0002-7402-9960	CAMPUS, 4 CRINAN ST, LONDON N1 9XW, ENGLAND	MAR 8	9	LONDON	33685443	J	BMC	2021		PAKULIENE, G (CORRESPONDING AUTHOR), LITHUANIAN UNIV HLTH SCI, OPHTHALMOL DEPT, EIVENIU G 2, LT-50161 KAUNAS, LITHUANIA.	OPHTHALMOLOGY				BMC OPHTHALMOLOGY
HAO HY;ZHAO YT;YAN QF;HIGASHITA R;ZHANG J;ZHAO YF;XU YW;LI F;ZHANG XL;LIU J	HAO, HUAYING;ZHAO, YITIAN;YAN, QIFENG;HIGASHITA, RISA;ZHANG, JIONG;ZHAO, YIFAN;XU, YANWU;LI, FEI;ZHANG, XIULAN;LIU, JIANG	AMIL P, 2019, SCI REP-UK, V9, DOI 10.1038/S41598-018-38136-8;APTEL F, 2012, INVEST OPHTH VIS SCI, V53, P4005, DOI 10.1167/IOVS.11-9387;BADRINARAYANAN V, 2017, IEEE T PATTERN ANAL, V39, P2481, DOI 10.1109/TPAMI.2016.2644615;CAO X., 2020, ARXIV PREPRINT ARXIV;CARREIRA J, 2017, PROC CVPR IEEE, P4724, DOI 10.1109/CVPR.2017.502;CASSON RJ, 2007, BRIT J OPHTHALMOL, V91, P856, DOI 10.1136/BJO.2006.108688…	PRECISE CHARACTERIZATION AND ANALYSIS OF ANTERIOR CHAMBER ANGLE (ACA) ARE OF GREAT IMPORTANCE IN FACILITATING CLINICAL EXAMINATION AND DIAGNOSIS OF ANGLE-CLOSURE DISEASE. CURRENTLY, THE GOLD STANDARD FOR DIAGNOSTIC ANGLE ASSESSMENT IS OBSERVATION OF ACA BY GONIOSCOPY. HOWEVER, GONIOSCOPY REQUIRES DIRECT CONTACT BETWEEN THE GONIOSCOPE AND PATIENTS' EYE, WHICH IS UNCOMFORTABLE FOR PATIENTS AND MAY …	101956				CHINESE ACAD SCI, CIXI INST BIOMED ENGN, NINGBO INST MAT TECHNOL & ENGN, NINGBO, ZHEJIANG, PEOPLES R CHINA.; SUN YAT SEN UNIV, ZHONGSHAN OPHTHALM CTR, STATE KEY LAB OPHTHALMOL, GUANGZHOU, PEOPLES R CHINA.; SOUTHERN UNIV SCI & TECHNOL, DEPT COMP SCI & ENGN, SHENZHEN, PEOPLES R CHINA.; GLAUCOMA ARTIFICIAL INTELLIGENCE DIAG & IMAGING A, GUANGZHOU, PEOPLES R CHINA.; GLAUCOMA ARTIFICIAL INTELLIGENCE D…	CHINESE ACADEMY OF SCIENCES; NINGBO INSTITUTE OF MATERIALS TECHNOLOGY AND ENGINEERING, CAS; SUN YAT SEN UNIVERSITY; SOUTHERN UNIVERSITY OF SCIENCE & TECHNOLOGY; UNIVERSITY OF SOUTHERN CALIFORNIA; CRANFIELD UNIVERSITY					2024-02-18	ANGLE-CLOSURE; GLAUCOMA; ANTERIOR CHAMBER ANGLE; AS-OCT; DEEP LEARNING	10.1016/j.media.2021.101956	ARTICLE; EARLY ACCESS	FEB 2021		1361-8423	YITIAN.ZHAO@NIMTE.AC.CN; LIUJ@SUSTECH.EDU.CN			ZHEJIANG PROVINCIAL NATURAL SCIENCE FOUNDATION OF CHINA [LZ19F010001, LQ19H180 0 01]; KEY RESEARCH AND DEVELOPMENT PROGRAM OF ZHEJIANG PROVINCE [2020C03036]; NINGBO '2025 ST MEGAPROJECTS' [2019B10033, 2019B10061]	THIS WORK WAS SUPPORTED BY ZHEJIANG PROVINCIAL NATURAL SCIENCE FOUNDATION OF CHINA (LZ19F010001, LQ19H180 0 01), THE KEY RESEARCH AND DEVELOPMENT PROGRAM OF ZHEJIANG PROVINCE (2020C03036), NINGBO `2025 S&T MEGAPROJECTS' (2019B10033, 2019B10061).	RM4GK	OPTICAL COHERENCE TOMOGRAPHY; OCCLUDABLE ANGLES; DARK CHANGES; GLAUCOMA; PREVALENCE; POPULATION; WIDTH; CLASSIFICATION; GONIOSCOPY; LIGHT		MED IMAGE ANAL	MED. IMAGE ANAL.	ENGLISH	59	GREEN PUBLISHED	LIU, JIANG JIMMY/0000-0001-6281-6505; ZHAO, YIFAN/0000-0003-2383-5724; ZHAO, YITIAN/0000-0002-0962-8377; ZHANG, XIULAN/0000-0002-9288-0767; XU, YANWU/0000-0002-1779-931X	RADARWEG 29, 1043 NX AMSTERDAM, NETHERLANDS	2021 APR	12	AMSTERDAM	33550010	J	ELSEVIER	2021	LIU, JIANG JIMMY/AHB-8921-2022; ZHAO, YIFAN/ADE-5116-2022; ZHAO, YITIAN/AAM-4907-2021; WANG, WEI/JBS-7400-2023	LIU, J (CORRESPONDING AUTHOR), CHINESE ACAD SCI, CIXI INST BIOMED ENGN, NINGBO INST MAT TECHNOL & ENGN, NINGBO, ZHEJIANG, PEOPLES R CHINA.; LIU, J (CORRESPONDING AUTHOR), SOUTHERN UNIV SCI & TECHNOL, DEPT COMP SCI & ENGN, SHENZHEN, PEOPLES R CHINA.; LIU, J (CORRESPONDING AUTHOR), GLAUCOMA ARTIFICIAL INTELLIGENCE DIAG & IMAGING A, GUANGZHOU, PEOPLES R CHINA.; LIU, J (CORRESPONDING AUTHOR), GLAUCOM…	COMPUTER SCIENCE; ENGINEERING; RADIOLOGY, NUCLEAR MEDICINE & MEDICAL IMAGING			1361-8415	MEDICAL IMAGE ANALYSIS
SHON K;SUNG KR;KWAK J;LEE JY;SHIN JW	SHON, KILHWAN;SUNG, KYUNG RIM;KWAK, JIEHOON;LEE, JOO YEON;SHIN, JOONG WON	BAEK S, 2013, INVEST OPHTH VIS SCI, V54, P848, DOI 10.1167/IOVS.12-10391;BOLLEN KA, 2002, ANNU REV PSYCHOL, V53, P605, DOI 10.1146/ANNUREV.PSYCH.53.100901.135239;BOOKSTEIN FL, 1989, IEEE T PATTERN ANAL, V11, P567, DOI 10.1109/34.24792;FU HZ, 2019, AM J OPHTHALMOL, V203, P37, DOI 10.1016/J.AJO.2019.02.028;HAN S, 2014, INVEST OPHTH VIS SCI, V55, DOI 10.1167/IOVS.14-14714;HAO HY, 2021, MED IMAGE ANA…	PURPOSE: TO DEVELOP A VARIATIONAL AUTOENCODER ( VAE) SUITABLE FOR ANALYSIS OF THE LATENT STRUCTURE OF ANTERIOR SEGMENT OPTICAL COHERENCE TOMOGRAPHY (AS-OCT) IMAGES AND TO INVESTIGATE POSSIBILITIES OF LATENT STRUCTURE ANALYSIS OF THE AS-OCT IMAGES. METHODS: WE RETROSPECTIVELY COLLECTED CLINICAL DATA AND AS-OCT IMAGES FROM2111 EYES OF 1261 PARTICIPANTS FROM THE ONGOING ASAN GLAUCOMA PROGRESSION STU…	30				GANGNEUNG ASAN HOSP, DEPT OPHTHALMOL, KANGNUNG, SOUTH KOREA.; UNIV ULSAN, DEPT OPHTHALMOL, COLL MED, ASAN MED CTR, SEOUL, SOUTH KOREA.; CAMP 9 ORTHOPED CLIN, HWASEONG SI, GYEONGGI DO, SOUTH KOREA.; ASAN ARTIFICIAL INTELLIGENCE INST, HWASEONG SI, GYEONGGI DO, SOUTH KOREA.;	UNIVERSITY OF ULSAN					2024-02-18	VARIATIONAL AUTOENCODER; ARTIFICIAL INTELLIGENCE; ANGLE CLOSURE GLAUCOMA; ANTERIOR SEGMENT OPTICAL COHERENCE TOMOGRAPHY	10.1167/tvst.11.8.30	ARTICLE				SUNGEYE@GMAIL.COM			ASAN INSTITUTE FOR LIFE SCIENCES, ASAN MEDICAL CENTER, SEOUL, SOUTH KOREA [2018-0500]	SUPPORTED BY A GRANT (2018-0500) FROM THE ASAN INSTITUTE FOR LIFE SCIENCES, ASAN MEDICAL CENTER, SEOUL, SOUTH KOREA.	I1UB9	ANGLE-CLOSURE; EYES	8	TRANSL VIS SCI TECHN	TRANSL. VIS. SCI. TECHNOL.	ENGLISH	26	GOLD, GREEN PUBLISHED		12300 TWINBROOK PARKWAY, ROCKVILLE, MD 20852-1606 USA	AUG	10	ROCKVILLE	36040250	J	ASSOC RESEARCH VISION OPHTHALMOLOGY INC	2022		SUNG, KR (CORRESPONDING AUTHOR), UNIV ULSAN, COLL MED, ASAN MED CTR, DEPT OPHTHALMOL, 388-1 PUNGNAP 2 DONG, SEOUL, SOUTH KOREA.	OPHTHALMOLOGY			2164-2591	TRANSLATIONAL VISION SCIENCE & TECHNOLOGY
AKIL H;HUANG P;CHOPRA V;FRANCIS B	AKIL, HANDAN;HUANG, PING;CHOPRA, VIKAS;FRANCIS, BRIAN	CHOMA MA, 2003, OPT EXPRESS, V11, P2183, DOI 10.1364/OE.11.002183;DAWCZYNSKI J, 2007, EUR J OPHTHALMOL, V17, P363, DOI 10.1177/112067210701700314;ESLAMI Y, 2013, CLIN EXP OPHTHALMOL, V41, P368, DOI 10.1111/J.1442-9071.2012.02871.X;FERCHER AF, 1995, OPT COMMUN, V117, P43, DOI 10.1016/0030-4018(95)00119-S;FRANCIS BA, 2008, J CATARACT REFR SURG, V34, P1096, DOI 10.1016/J.JCRS.2008.03.032;HUANG GF, 2…	PURPOSE. TO COMPARE THE CHANGES OF ANTERIOR SEGMENT PARAMETERS, ASSESSED BY SWEPT SOURCE ANTERIOR SEGMENT OPTICAL COHERENCE TOMOGRAPHY (AS-OCT) AFTER COMBINED TRABECTOME-CATARACT SURGERY AND TRABECTOME-ONLY SURGERY IN OPEN ANGLE GLAUCOMA PATIENTS. METHODS. THIRTY-EIGHT EYES OF 24 PATIENTS WITH OPEN ANGLE GLAUCOMA WERE SCANNED WITH SWEPT SOURCE AS-OCT BEFORE AND 4 WEEKS AFTER COMBINED TRABECTOME-C…	4861837				DOHENY IMAGE READING CTR, DOHENY EYE INST, LOS ANGELES, CA 90033 USA.; DAVID GEFFEN SCH MED, DEPT OPHTHALMOL, LOS ANGELES, CA USA.;	DOHENY EYE INSTITUTE; UNIVERSITY OF CALIFORNIA SYSTEM; UNIVERSITY OF CALIFORNIA LOS ANGELES; UNIVERSITY OF CALIFORNIA LOS ANGELES MEDICAL CENTER; DAVID GEFFEN SCHOOL OF MEDICINE AT UCLA					2024-02-18		10.1155/2016/4861837	ARTICLE			2090-0058	HANDANAKIL84@GMAIL.COM					DZ3NC	CHAMBER ANGLE MEASUREMENT; NARROW ANGLES; COMBINED CATARACT; EYES; ASSOCIATION; GLAUCOMA; VOLUME; DEPTH; AREA; OCT		J OPHTHALMOL	J. OPHTHALMOL.	ENGLISH	28	GOLD, GREEN PUBLISHED, GREEN SUBMITTED	CHOPRA, VIKAS/0000-0002-3372-0026	ADAM HOUSE, 3RD FLR, 1 FITZROY SQ, LONDON, W1T 5HF, ENGLAND		7	LONDON	27795855	J	HINDAWI LTD	2016		AKIL, H (CORRESPONDING AUTHOR), DOHENY IMAGE READING CTR, DOHENY EYE INST, LOS ANGELES, CA 90033 USA.	OPHTHALMOLOGY			2090-004X	JOURNAL OF OPHTHALMOLOGY
MOHAMMADI M;JOHARI M;ESLAMI Y;MOGHIMI S;ZAREI R;FAKHRAIE G;SAFIZADEH M	MOHAMMADI, MASSOOD;JOHARI, MOHAMMADKARIM;ESLAMI, YADOLLAH;MOGHIMI, SASAN;ZAREI, REZA;FAKHRAIE, GHASEM;SAFIZADEH, MONA	AKIL H, 2017, BMC OPHTHALMOL, V17, DOI 10.1186/S12886-017-0425-3;ANONYMOUS, 2017, BRIT J OPHTHALMOL, V101, P73, DOI 10.1136/BJOPHTHALMOL-2016-EGSGUIDELINE.002;DAMJI KF, 2009, CAN J OPHTHALMOL, V44, P70, DOI 10.3129/I08-181;DOGANAY S, 2012, CLIN EXP OPTOM, V95, P218, DOI 10.1111/J.1444-0938.2011.00691.X;EHRNROOTH P, 2002, ACTA OPHTHALMOL SCAN, V80, P267, DOI 10.1034/J.1600-0420.2002.800307.X;FUTA …	PURPOSE: TO COMPARE ANTERIOR SEGMENT AND ANGLE PARAMETERS BETWEEN PSEUDOEXFOLIATION SYNDROME (PEX) AND PEX GLAUCOMA (PEXG) AND NORMAL CONTROL SUBJECTS USING ANTERIOR SEGMENT OPTICAL COHERENCE TOMOGRAPHY (ASOCT) IMAGING. DESIGN: CROSS-SECTIONAL STUDY. METHODS: ONE HUNDRED AND TWO SUBJECTS WITH PEXG, PEX, AND NORMAL EYES AS THE CONTROL GROUP WERE RECRUITED FROM AN ACADEMIC REFERRAL INSTITUTION. ALL…				199	UNIV TEHRAN MED SCI, FARABI EYE HOSP MM, TEHRAN, IRAN.; UNIV CALIF SAN DIEGO, HAMILTON GLAUCOMA CTR, VITERBI FAMILY DEPT OPHTHALMOL, SHILEY EYE INST, SAN DIEGO, CA 92103 USA.; SHIRAZ UNIV MED SCI, POOSTCHI OPHTHALMOL RES CTR, SCH MED, DEPT OPHTHALMOL, SHIRAZ, IRAN.;	TEHRAN UNIVERSITY OF MEDICAL SCIENCES; UNIVERSITY OF CALIFORNIA SYSTEM; UNIVERSITY OF CALIFORNIA SAN DIEGO; SHIRAZ UNIVERSITY OF MEDICAL SCIENCE					2024-02-18		10.1016/j.ajo.2021.07.025	ARTICLE; EARLY ACCESS	NOV 2021		1879-1891	MONA.SAFIZADEH@GMAIL.COM	204				XI3TM	OPEN-ANGLE GLAUCOMA; ULTRASOUND BIOMICROSCOPY; TRABECULECTOMY; EYES		AM J OPHTHALMOL	AM. J. OPHTHALMOL.	ENGLISH	31		MOHAMMADI, MASSOOD/0000-0002-3017-6643	STE 800, 230 PARK AVE, NEW YORK, NY 10169 USA	2022 FEB	6	NEW YORK	34329617	J	ELSEVIER SCIENCE INC	2022	ZAREI, REZA/GRF-6080-2022	SAFIZADEH, M (CORRESPONDING AUTHOR), FARABI EYE HOSP, QAZVIN SQ,SOUTH KARGAR ST, TEHRAN 1336616351, IRAN.	OPHTHALMOLOGY			0002-9394	AMERICAN JOURNAL OF OPHTHALMOLOGY
WANG GW;GONZALEZ E;LIN SC	WANG, GLORIA W.;GONZALEZ, EDUARDO;LIN, SHAN C.	BELL RWD, 1997, EYE, V11, P663, DOI 10.1038/EYE.1997.174;PALMBERG P, 1996, INVEST OPHTH VIS SCI, V37, P2032;PERKINS TW, 1998, J GLAUCOMA, V7, P230;SEAH S K, 1995, J GLAUCOMA, V4, P73;STAMPER RL, 1992, AM J OPHTHALMOL, V114, P544, DOI 10.1016/S0002-9394(14)74481-2	PURPOSE: TO REPORT A CASE OF EXTENSIVE INTRASTROMAL CORNEAL INFILTRATION WITH OPACIFICATION AFTER COMPRESSION SUTURE PLACEMENT FOR HYPOTONY MACULOPATHY. DESIGN: RETROSPECTIVE CASE REPORT. METHODS: A 24-YEAR-OLD INDIAN MALE WITH HYPOTONY MACULOPATHY AFTER TRABECULECTOMY WAS REFERRED TO US FOR MANAGEMENT OF OVERFILTRATION. COMPRESSION SUTURES WERE PLACED TO REDUCE BLEB SIZE AND AREA OF FILTRATION. …				244	STANFORD UNIV, DEPT OPHTHALMOL, STANFORD, CA 94305 USA.; UNIV CALIF SAN FRANCISCO, DEPT OPHTHALMOL, SAN FRANCISCO, CA 94143 USA.;	STANFORD UNIVERSITY; UNIVERSITY OF CALIFORNIA SYSTEM; UNIVERSITY OF CALIFORNIA SAN FRANCISCO					2024-02-18	HYPOTONY; HYPOTONY MACULOPATHY; COMPRESSION SUTURES; VISANTE ANTERIOR SEGMENT OCT; OVERFILTERING BLEB	10.1097/IJG.0b013e3181e3d0cd	ARTICLE			1536-481X	GLOWANG@STANFORD.EDU	245				744BW	TRABECULECTOMY	4	J GLAUCOMA	J. GLAUCOMA	ENGLISH	5			TWO COMMERCE SQ, 2001 MARKET ST, PHILADELPHIA, PA 19103 USA	APR-MAY	2	PHILADELPHIA	20520566	J	LIPPINCOTT WILLIAMS & WILKINS	2011		WANG, GW (CORRESPONDING AUTHOR), STANFORD UNIV, DEPT OPHTHALMOL, 300 PASTEUR DR,ROOM A157, STANFORD, CA 94305 USA.	OPHTHALMOLOGY			1057-0829	JOURNAL OF GLAUCOMA
BOUTBOUL S;LETAIEF I;LALLOUM F;PUECH M;BORDERIE V;LAROCHE L	BOUTBOUL, SANDRINE;LETAIEF, IMENE;LALLOUM, FRANCK;PUECH, MICHEL;BORDERIE, VINCENT;LAROCHE, LAURENT	BRANDT JD, 2001, AM J OPHTHALMOL, V131, P260, DOI 10.1016/S0002-9394(00)00606-1;CHANG SHL, 2004, J CATARACT REFR SURG, V30, P2219, DOI 10.1016/J.JCRS.2004.03.034;DETRY-MOREL ML, 2006, J CATARACT REFR SURG, V32, P1866, DOI 10.1016/J.JCRS.2006.08.018;KODJIKIAN L, 2002, J CATARACT REFR SURG, V28, P2217, DOI 10.1016/S0886-3350(02)01213-0;LEBOYER RM, 2005, J CATARACT REFR SURG, V31, P1421, DOI 10.1016…	AFTER UNEVENTFUL PHACOEMULSIFICATION AND IN-THE-BAG IMPLANTATION OF AN ACRYSOF SA60AT (ALCON) INTRAOCULAR LENS (IOL), A 52-YEAR-OLD BLACK MAN DEVELOPED PIGMENTARY GLAUCOMA. SLITLAMP EXAMINATION, ANTERIOR SEGMENT OPTICAL COHERENCE TOMOGRAPHY, AND ULTRASOUND BIOMICROSCOPY SHOWED THAT THE POSTERIOR SURFACE OF THE IRIS WAS BEING RUBBED BY THE INFERIOR HAPTIC OF THE IOL, WHICH WAS IN THE BAG BUT DEFOR…				1595	CHNO 15 20, DEPT OPHTHALMOL, F-75012 PARIS, FRANCE.;	SORBONNE UNIVERSITE; CHNO DES QUINZE-VINGTS					2024-02-18		10.1016/j.jcrs.2008.04.054	ARTICLE			1873-4502	SKOWRONEK@FREE.FR	1597				346EK	CILIARY SULCUS; DISPERSION; PRESSURE	9	J CATARACT REFR SURG	J. CATARACT. REFRACT. SURG.	ENGLISH	9		BORDERIE, VINCENT/0000-0002-1395-8483	360 PARK AVE SOUTH, NEW YORK, NY 10010-1710 USA	SEP	3	NEW YORK	18721726	J	ELSEVIER SCIENCE INC	2008	BORDERIE, VINCENT/AAT-1092-2021	BOUTBOUL, S (CORRESPONDING AUTHOR), CHNO 15 20, DEPT OPHTHALMOL, 28 RUE CHARENTON, F-75012 PARIS, FRANCE.	OPHTHALMOLOGY; SURGERY			0886-3350	JOURNAL OF CATARACT AND REFRACTIVE SURGERY
ERASLAN N;CELIKAY O	ERASLAN, NUMAN;CELIKAY, OSMAN	ANONYMOUS, 2017, BRIT J OPHTHALMOL, V101, P73, DOI 10.1136/BJOPHTHALMOL-2016-EGSGUIDELINE.002;BAFA M, 2011, ACTA OPHTHALMOL, V89, P448, DOI 10.1111/J.1755-3768.2009.01731.X;BRANDT JD, 2008, OPHTHALMOLOGY, V115, P1550, DOI 10.1016/J.OPHTHA.2008.02.001;CAVDARLI C., 2015, INT EYE SCI, V15, P2040;EHLERS N, 1975, ACTA OPHTHALMOL, V53, P34;FOGAGNOLO P, 2010, J GLAUCOMA, V19, P418, DOI 10.1097/IJG.0B013…	PURPOSETO EVALUATE THE EFFECTS OF LATANOPROST, BIMATOPROST, AND TRAVOPROST EYE DROPS AND THEIR PRESERVATIVES ON EACH CORNEAL LAYER THICKNESS IN PATIENTS WITH PRIMARY OPEN-ANGLE GLAUCOMA (POAG).METHODSWE RETROSPECTIVELY ANALYZED 79 EYES OF 79 PATIENTS WITH POAG WHO WERE RECEIVING PROSTAGLANDIN THERAPY. PATIENTS WERE DIVIDED INTO THREE SUBGROUPS ACCORDING TO MONOTHERAPY WITH LATANOPROST, BIMATOPROS…				3175	DISKAPI YILDIRIM BEYAZIT TRAINING & RES HOSP, DEPT OPHTHALMOL, ANKARA, TURKIYE.;	DISKAPI YILDIRIM BEYAZIT TRAINING & RESEARCH HOSPITAL					2024-02-18	CENTRAL CORNEAL LAYERS' THINNING; PRIMARY OPEN-ANGLE GLAUCOMA; PROSTAGLANDIN ANALOGS; PROSTAMIDE; PRESERVATIVES	10.1007/s10792-023-02717-y	ARTICLE; EARLY ACCESS	APR 2023		1573-2630	NUMANERASLAN@HOTMAIL.COM	3184				N9PR8	OCULAR HYPERTENSION; CILIARY MUSCLE; LATANOPROST; TRAVOPROST; BIMATOPROST; ANALOGS; MATRIX; EXPRESSION; RECEPTOR; CELLS	9	INT OPHTHALMOL	INT. OPHTHALMOL.	ENGLISH	38			VAN GODEWIJCKSTRAAT 30, 3311 GZ DORDRECHT, NETHERLANDS	2023 SEP	10	DORDRECHT	37067694	J	SPRINGER	2023	ERASLAN, NUMAN/AGS-2216-2022; ERASLAN, NUMAN/ADO-1391-2022	ERASLAN, N (CORRESPONDING AUTHOR), DISKAPI YILDIRIM BEYAZIT TRAINING & RES HOSP, DEPT OPHTHALMOL, ANKARA, TURKIYE.	OPHTHALMOLOGY			0165-5701	INTERNATIONAL OPHTHALMOLOGY
KOKUBUN T;TSUDA S;KUNIKATA H;HIMORI N;YOKOYAMA Y;KUNIMATSU-SANUKI S;NAKAZAWA T	KOKUBUN, TAIKI;TSUDA, SATORU;KUNIKATA, HIROSHI;HIMORI, NORIKO;YOKOYAMA, YU;KUNIMATSU-SANUKI, SHIHO;NAKAZAWA, TORU	ADDICKS EM, 1983, ARCH OPHTHALMOL-CHIC, V101, P795;ALLEN RC, 1982, OPHTHALMOLOGY, V89, P1181;AVITABILE T., 1998, OPHTHALMOLOGICA, V212, P17, DOI 10.1159/000055414;BABALOLA O, 2014, ARCH DERMATOL RES, V306, P1, DOI 10.1007/S00403-013-1417-7;CAIRNS J E, 1972, TRANSACTIONS OF THE AMERICAN ACADEMY OF OPHTHALMOLOGY AND OTO-LARYNGOLOGY, V76, P384;CHORITZ L, 2013, OPHTHALMOLOGE, V110, P714, DOI 10.1007/…	PURPOSE: TO DETERMINE WHETHER ANTERIOR-SEGMENT OPTICAL COHERENCE TOMOGRAPHY (AS-OCT) CAN BE USED TO PREDICT POST-TRABECULECTOMY BLEB OUTCOMES.MATERIALS AND METHODS: WE DIVIDED 58 EYES OF 47 TRABECULECTOMY PATIENTS INTO SUCCESS OR FAILURE GROUPS BASED ON THEIR STATUS AT 12MONTHS AFTER SURGERY. WE THEN COMPARED VARIOUS AS-OCT MEASUREMENT PARAMETERS BETWEEN THE TWO GROUPS AT 1 AND 2WEEKS AND 1, 3, 6…				762	TOHOKU UNIV, GRAD SCH MED, DEPT OPHTHALMOL, SENDAI, MIYAGI, JAPAN.; TOHOKU UNIV, GRAD SCH MED, DEPT RETINAL DIS CONTROL, OPHTHALMOL, SENDAI, MIYAGI, JAPAN.; TOHOKU UNIV, GRAD SCH MED, DEPT ADV OPHTHALM MED, SENDAI, MIYAGI, JAPAN.; TOHOKU UNIV, GRAD SCH MED, DEPT OPHTHALM IMAGING & INFORMAT ANALYT, SENDAI, MIYAGI, JAPAN.;	TOHOKU UNIVERSITY; TOHOKU UNIVERSITY; TOHOKU UNIVERSITY; TOHOKU UNIVERSITY					2024-02-18	FILTERING BLEB; ANTERIOR SEGMENT OPTICAL COHERENCE TOMOGRAPHY; TRABECULECTOMY; GLAUCOMA ANTERIOR SEGMENT; PROGNOSIS	10.1080/02713683.2018.1446535	ARTICLE			1460-2202	NTORU@OPH.MED.TOHOKU.AC.JP	770		JST GRANT FROM JSPS KAKENHI [T.N. 26293372]	THIS PAPER WAS SUPPORTED IN PART BY A JST GRANT FROM JSPS KAKENHI GRANTS-IN-AID FOR SCIENTIFIC RESEARCH (B) (T.N. 26293372). THE FUNDER HAD NO ROLE IN DESIGN OR CONDUCT OF THE STUDY; COLLECTION, MANAGEMENT, ANALYSIS, OR INTERPRETATION OF THE DATA; PREPARATION, REVIEW, OR APPROVAL OF THE MANUSCRIPT; OR THE DECISION TO SUBMIT THE MANUSCRIPT FOR PUBLICATION.	GG3YZ	GLAUCOMA FILTRATION SURGERY; FILTERING BLEBS; ULTRASOUND BIOMICROSCOPY; NEOVASCULAR GLAUCOMA; AQUEOUS-HUMOR; MITOMYCIN-C; CONFOCAL MICROSCOPY; PHASE RETARDATION; FOLLOW-UP; MODULATION	6	CURR EYE RES	CURR. EYE RES.	ENGLISH	58			530 WALNUT STREET, STE 850, PHILADELPHIA, PA 19106 USA		9	PHILADELPHIA	29513109	J	TAYLOR & FRANCIS INC	2018		NAKAZAWA, T (CORRESPONDING AUTHOR), TOHOKU UNIV, GRAD SCH MED, DEPT OPHTHALMOL, AOBA KU, 1-1 SEIRYO MACHI, SENDAI, MIYAGI 9808574, JAPAN.	OPHTHALMOLOGY			0271-3683	CURRENT EYE RESEARCH
SAKATA LM;WONG TTL;WONG HT;KUMAR RS;HTOON HM;AUNG HT;HE M;AUNG T	SAKATA, L. M.;WONG, T. T. L.;WONG, H-T;KUMAR, R. S.;HTOON, H. M.;AUNG, H. T.;HE, M.;AUNG, T.	BLAND JM, 1999, STAT METHODS MED RES, V8, P135, DOI 10.1177/096228029900800204;BLAND JM, 1986, LANCET, V1, P307, DOI 10.1016/S0140-6736(86)90837-8;CHAN Y H, 2003, SINGAPORE MED J, V44, P614;CONSOLE JW, 2008, BRIT J OPHTHALMOL, V92, P1612, DOI 10.1136/BJO.2007.129932;GOLDSMITH JA, 2005, OPHTHALMOLOGY, V112, P238, DOI 10.1016/J.OPHTHA.2004.09.019;ISHIKAWA H, 2000, CURR OPIN OPHTHALMOL, V11, P133, D…	AIMS TO COMPARE THE DIAGNOSTIC PERFORMANCE OF TWO ANTERIOR SEGMENT OPTICAL COHERENCE TOMOGRAPHY (AS-OCT) DEVICES IN ASSESSING THE ANTERIOR CHAMBER ANGLE (ACA). METHODS VISANTE-OCT AND SLIT-LAMP-OCT (SL-OCT) WERE PERFORMED ON 101 PATIENTS BY A SINGLE OPERATOR. THE AS-OCT IMAGES WERE PROCESSED BY CUSTOMISED 'DEWARPING' SOFTWARE AND ASSESSED BY TWO GLAUCOMA SPECIALISTS MASKED TO CLINICAL FINDINGS. A…				578	SINGAPORE NATL EYE CTR, SINGAPORE EYE RES INST, SINGAPORE 168751, SINGAPORE.; TAN TOCK SENG HOSP, SINGAPORE, SINGAPORE.; ZHONGSHAN OPHTHALM CTR, GUANGZHOU, GUANGDONG, PEOPLES R CHINA.; NATL UNIV SINGAPORE, YONG LOO LIN SCH MED, SINGAPORE 117595, SINGAPORE.;	NATIONAL UNIVERSITY OF SINGAPORE; SINGAPORE NATIONAL EYE CENTER; TAN TOCK SENG HOSPITAL; NATIONAL UNIVERSITY OF SINGAPORE					2024-02-18	ANGLE CLOSURE GLAUCOMA; ANGLE CLOSURE; CLOSED ANGLE; OPTICAL COHERENCE TOMOGRAPHY	10.1038/eye.2009.141	ARTICLE			1476-5454	TIN11@PACIFIC.NET.SG	587		CARL ZEISS MEDITEC; HEIDELBERG ENGINEERING	CARL ZEISS MEDITEC AND HEIDELBERG ENGINEERING LOANED THE RESPECTIVE ANTERIOR SEGMENT OCTS AND PROVIDED TECHNICAL SUPPORT. DR AUNG HAS RECEIVED RESEARCH SUPPORT AND HONORARIA FOR TRAVEL TO CONFERENCES FROM CARL ZEISS MEDITEC. DR HT WONG HAS RECEIVED FINANCIAL SUPPORT AND HONORARIA FOR TRAVEL TO CONFERENCES FROM CARL ZEISS MEDITEC AND HEIDELBERG ENGINEERING.	583SY	ULTRASOUND BIOMICROSCOPY; WIDTH	4	EYE	EYE	ENGLISH	18	BRONZE	HE, MINGGUANG/0000-0002-6912-2810;	MACMILLAN BUILDING, 4 CRINAN ST, LONDON N1 9XW, ENGLAND	APR	10	LONDON	19521435	J	NATURE PUBLISHING GROUP	2010	HE, MINGGUANG/AAY-5239-2020; HE, MING/HZM-5794-2023; TIN, AUNG/B-6521-2009; HE, MING/JDN-0835-2023; KUMAR, RAJESH S/L-2018-2019	AUNG, T (CORRESPONDING AUTHOR), SINGAPORE NATL EYE CTR, SINGAPORE EYE RES INST, 11 3RD HOSP AVE, SINGAPORE 168751, SINGAPORE.	OPHTHALMOLOGY			0950-222X	EYE
BALD M;LI Y;HUANG D	BALD, MATTHEW;LI, YAN;HUANG, DAVID	CHEUNG CY, 2011, BRIT J OPHTHALMOL, V95, P955, DOI 10.1136/BJO.2010.189217;CHOMA MA, 2003, OPT EXPRESS, V11, P2183, DOI 10.1364/OE.11.002183;DORAIRAJ SYRIL, 2007, TRANS AM OPHTHALMOL SOC, V105, P99;FUJIMOTO J., 2010, IMAGING EYE FRONT BA;FUKUDA R, 2012, CORNEA, V31, P259, DOI 10.1097/ICO.0B013E318226DAA9;HEE MR, 1995, ARCH OPHTHALMOL-CHIC, V113, P325, DOI 10.1001/ARCHOPHT.1995.01100030081025;HUAN…	NEW ADVANCES IN ANTERIOR SEGMENT OPTICAL COHERENCE TOMOGRAPHY (OCT) TECHNOLOGY DEVELOPMENT ALLOW VISUALIZING THE ANTERIOR CHAMBER ANGLE OF THE EYE WITH HIGH SPEED AND HIGH RESOLUTION. FOURIER-DOMAIN (FD) OCT INSTRUMENTS WORKING AT 840 NM CAN RELIABLY IDENTIFY FINE ANGLE STRUCTURES SUCH AS THE SCHWALBE'S LINE. THIS PAPER DEMONSTRATES QUANTITATIVE ANGLE ASSESSMENT WITH 840NM FD-OCT AND PROVIDES DIA…	103704				OREGON HLTH & SCI UNIV, CTR OPHTHALM OPT & LASERS, CASEY EYE INST, PORTLAND, OR 97239 USA.; OREGON HLTH & SCI UNIV, DEPT OPHTHALMOL, PORTLAND, OR 97239 USA.;	OREGON HEALTH & SCIENCE UNIVERSITY; OREGON HEALTH & SCIENCE UNIVERSITY					2024-02-18		10.1155/2012/103704	REVIEW			2090-0058	DAVIDHUANG@ALUM.MIT.EDU			NATIONAL INSTITUTE OF HEALTH GRANT [R01 EY018184]; OPTOVUE, INC.; RESEARCH TO PREVENT BLINDNESS	THE AUTHORS WOULD LIKE TO ACKNOWLEDGE THE FINANCIAL SUPPORT OF NATIONAL INSTITUTE OF HEALTH GRANT R01 EY018184, A RESEARCH GRANT FROM OPTOVUE, INC., AND AN UNRESTRICTED GRANT FROM RESEARCH TO PREVENT BLINDNESS.	979EE	SWEPT SOURCE; IN-VIVO; SEGMENT; CLOSURE		J OPHTHALMOL	J. OPHTHALMOL.	ENGLISH	28	GREEN SUBMITTED, GREEN PUBLISHED, GOLD		ADAM HOUSE, 3RD FLR, 1 FITZROY SQ, LONDON, W1T 5HF, ENGLAND		5	LONDON	22811886	J	HINDAWI LTD	2012		HUANG, D (CORRESPONDING AUTHOR), OREGON HLTH & SCI UNIV, CTR OPHTHALM OPT & LASERS, CASEY EYE INST, PORTLAND, OR 97239 USA.	OPHTHALMOLOGY			2090-004X	JOURNAL OF OPHTHALMOLOGY
PALANISAMY S;RAJA V;SENTHILKUMAR VA;MANI I;KRISHNADAS R	PALANISAMY, SREERAMYAA;RAJA, VIDYA;SENTHILKUMAR, VIJAYALAKSHMI A.;MANI, ISWARYA;KRISHNADAS, R.	ACET Y, 2016, J GLAUCOMA, V25, P14, DOI 10.1097/IJG.0000000000000068;ANG LPK, 2004, OPHTHALMOLOGY, V111, P1636, DOI 10.1016/J.OPHTHA.2004.01.032;ATALAY E, 2016, OPHTHALMOLOGY, V123, P1957, DOI 10.1016/J.OPHTHA.2016.05.026;CHYLACK LT, 1993, ARCH OPHTHALMOL-CHIC, V111, P831, DOI 10.1001/ARCHOPHT.1993.01090060119035;DAS JAYACHANDRA, 2001, INDIAN JOURNAL OF OPHTHALMOLOGY, V49, P25;DHILLON B, 1990, AS…	PURPOSE: TO CORRELATE AND ANALYZE THE PATTERN OF THE VISUAL FIELD (VF) DEFECTS BY PERIMETRY AND ANTERIOR CHAMBER ANGLE PARAMETERS BY AS-OCT IN PRIMARY ANGLE-CLOSURE GLAUCOMA (PACG) ACROSS VARIED SEVERITY LEVELS ON PRESENTATION TO A TERTIARY EYE CARE CENTER. METHODS: THIS WAS A CROSS-SECTIONAL STUDY, WHICH INCLUDED 323 EYES OF CLINICALLY DIAGNOSED CASES OF PACG. GLAUCOMA SEVERITY WAS CATEGORIZED A…				2895	ARAVIND EYE HOSP & POSTGRAD INST OPHTHALMOL, DEPT GLAUCOMA, MADURAI, TAMIL NADU, INDIA.; ARAVIND EYE HOSP & POSTGRAD INST OPHTHALMOL, DEPT BIOSTAT, MADURAI, TAMIL NADU, INDIA.;						2024-02-18	ANTERIOR CHAMBER ANGLE PARAMETERS; AS-OCT; MEAN DEVIATION; PRIMARY ANGLE-CLOSURE GLAUCOMA; VISUAL FIELD DEFECTS	10.4103/ijo.IJO_232_22	ARTICLE			1998-3689	VIJIMMC@GMAIL.COM	2901				4D6HV	CLASSIFICATION; SUBTYPES; PEOPLE; EYES	8	INDIAN J OPHTHALMOL	INDIAN J. OPHTHALMOL.	ENGLISH	20	GOLD, GREEN PUBLISHED		WOLTERS KLUWER INDIA PVT LTD , A-202, 2ND FLR, QUBE, C T S NO 1498A-2 VILLAGE MAROL, ANDHERI EAST, MUMBAI, MAHARASHTRA, INDIA	AUG	7	MUMBAI	35918939	J	WOLTERS KLUWER MEDKNOW PUBLICATIONS	2022		SENTHILKUMAR, VA (CORRESPONDING AUTHOR), ARAVIND EYE HOSP & POSTGRAD INST OPHTHALMOL, DEPT GLAUCOMA, MADURAI, TAMIL NADU, INDIA.	OPHTHALMOLOGY			0301-4738	INDIAN JOURNAL OF OPHTHALMOLOGY
DAI YY;ZHANG SD;SHEN MX;JIN Z;ZHOU YH;YE SL;BAO CH;ZHU DX	DAI, YINGYING;ZHANG, SHAODAN;SHEN, MEIXIAO;JIN, ZI;ZHOU, YUHENG;YE, SHULING;BAO, CHENHONG;ZHU, DEXI	AUNG T, 2005, OPHTHALMOLOGY, V112, P28, DOI 10.1016/J.OPHTHA.2004.06.033;BASKARAN M, 2013, OPHTHALMOLOGY, V120, P2226, DOI 10.1016/J.OPHTHA.2013.04.020;CAMPBELL DG, 1984, OPHTHALMOLOGY, V91, P1052;CHANG DS, 2013, INVEST OPHTH VIS SCI, V54, P5596, DOI 10.1167/IOVS.13-12142;CUMBA RJ, 2012, J OPHTHALMOL, V2012, DOI 10.1155/2012/487309;DAI YY, 2020, EYE VISION, V7, DOI 10.1186/S40662-020-00196-1;FOO …	PURPOSE TO GENERATE A MODEL THAT EVALUATES THE PRESENCE AND EXTENT OF PERIPHERAL ANTERIOR SYNECHIA (PAS) BASED ON ANTERIOR SEGMENT OPTICAL COHERENCE TOMOGRAPHY (AS-OCT). METHODS THE EXTENT OF PAS INVOLVEMENT IN THE EYES OF PATIENTS WITH ANGLE CLOSURE WAS ASSESSED BY INDENTATION GONIOSCOPY, AND THE PART OF NON-PAS AND PAS WERE ASSIGNED INTO TWO GROUPS (NPAS AND PAS). ANTERIOR CHAMBER ANGLES WERE T…				2753	ZHEJIANG IND & TRADE VOCAT COLL, WENZHOU, ZHEJIANG, PEOPLES R CHINA.; WENZHOU MED UNIV, SCH OPHTHALMOL & OPTOMETRY, WENZHOU, ZHEJIANG, PEOPLES R CHINA.;	WENZHOU MEDICAL UNIVERSITY					2024-02-18	PERIPHERAL ANTERIOR SYNECHIA; OPTICAL COHERENCE TOMOGRAPHY; ANTERIOR CHAMBER ANGLE; GLAUCOMA; MODEL	10.1007/s00417-021-05220-1	ARTICLE; EARLY ACCESS	MAY 2021		1435-702X	ZHUDEXIOO@HOTMAIL.COM	2759		NATURAL SCIENCE FOUNDATION OF ZHEJIANG PROVINCE [LY18H180008]; OPTOMETRY ENGINEERING TECHNOLOGY DEVELOPMENT PROJECT OF ZHEJIANG EYE HOSPITAL [GCKF201603]	THIS WORK WAS SUPPORTED BY THE [NATURAL SCIENCE FOUNDATION OF ZHEJIANG PROVINCE] UNDER GRANT [NO. LY18H180008] AND [OPTOMETRY ENGINEERING TECHNOLOGY DEVELOPMENT PROJECT OF ZHEJIANG EYE HOSPITAL] UNDER GRANT [NO. GCKF201603].	UD4CF	ANGLE-CLOSURE; CHAMBER ANGLE; WIDTH; LIGHT; EYES; GONIOSCOPY; OCT	9	GRAEF ARCH CLIN EXP	GRAEFES ARCH. CLIN. EXP. OPHTHALMOL.	ENGLISH	27		ZHU, DEXI/0000-0001-5553-2088	ONE NEW YORK PLAZA, SUITE 4600, NEW YORK, NY, UNITED STATES	2021 SEP	7	NEW YORK	33974133	J	SPRINGER	2021	ZHANG, SHAODAN/HTO-5473-2023; JIN, ZI/IYI-9577-2023	ZHU, DX (CORRESPONDING AUTHOR), WENZHOU MED UNIV, SCH OPHTHALMOL & OPTOMETRY, WENZHOU, ZHEJIANG, PEOPLES R CHINA.	OPHTHALMOLOGY			0721-832X	GRAEFES ARCHIVE FOR CLINICAL AND EXPERIMENTAL OPHTHALMOLOGY
PARK HYL;AHN MD	PARK, HAE-YOUNG LOPILLY;AHN, MYUNG DOUK	ADDICKS EM, 1983, ARCH OPHTHALMOL-CHIC, V101, P795;APTEL F, 2009, EUR J OPHTHALMOL, V19, P223, DOI 10.1177/112067210901900208;CANTOR LB, 2003, J GLAUCOMA, V12, P266, DOI 10.1097/00061198-200306000-00015;GOUWS P, 2008, CAN J OPHTHALMOL, V43, P222, DOI 10.3129/I08-006;HENDERER JD, 2001, J GLAUCOMA, V10, P266, DOI 10.1097/00061198-200108000-00004;HUANG D, 1991, SCIENCE, V254, P1178, DOI 10.1126/SCIE…	WE INVESTIGATED CHANGES IN INTRABLEB MORPHOLOGY OF FUNCTIONING TRABECULECTOMY BLEBS WITH ANTERIOR SEGMENT OPTICAL COHERENCE TOMOGRAPHY (AS-OCT) AFTER DIGITAL OCULAR COMPRESSION. SIXTY-EIGHT PATIENTS WHO UNDERWENT FORNIX-BASED TRABECULECTOMY WERE RECRUITED FROM SEOUL ST. MARY'S HOSPITAL. INTRAOCULAR PRESSURE (IOP) AND AS-OCT IMAGES WERE TAKEN BEFORE AND AFTER OCULAR COMPRESSION. BLEB HEIGHT AND WA…				38	CATHOLIC UNIV KOREA, COLL MED, SEOUL ST MARYS HOSP, DEPT OPHTHALMOL & VISUAL SCI, SEOUL 137701, SOUTH KOREA.;	CATHOLIC UNIVERSITY OF KOREA; SEOUL ST. MARY'S HOSPITAL					2024-02-18	TRABECULECTOMY; BLEB MORPHOLOGY; ANTERIOR SEGMENT OPTICAL COHERENCE TOMOGRAPHY; OCULAR COMPRESSION	10.1007/s10384-011-0101-8	ARTICLE			1613-2246	MDAHN@CATHOLIC.AC.KR	45				877JS	FILTERING BLEBS; FILTRATION	1	JPN J OPHTHALMOL	JPN. J. OPHTHALMOL.	ENGLISH	23			SHIROYAMA TRUST TOWER 5F, 4-3-1 TORANOMON, MINATO-KU, TOKYO, 105-6005, JAPAN	JAN	8	TOKYO	22116581	J	SPRINGER JAPAN KK	2012		AHN, MD (CORRESPONDING AUTHOR), CATHOLIC UNIV KOREA, COLL MED, SEOUL ST MARYS HOSP, DEPT OPHTHALMOL & VISUAL SCI, 505 BANPO DONG, SEOUL 137701, SOUTH KOREA.	OPHTHALMOLOGY			0021-5155	JAPANESE JOURNAL OF OPHTHALMOLOGY
KANG JJ;ALLEMANN N;DE LA CRUZ J;CORTINA MS	KANG, JOANN J.;ALLEMANN, NORMA;DE LA CRUZ, JOSE;CORTINA, MARIA SOLEDAD	BRADLEY JC, 2009, CORNEA, V28, P321, DOI 10.1097/ICO.0B013E31818B8BFA;COHEN EJ, 1982, OPHTHALMIC SURG LAS, V13, P994;DADA T, 2008, CORNEA, V27, P402, DOI 10.1097/ICO.0B013E31816373C5;DOHLMAN CH, 2006, EXPERT REV OPHTHALMO, V1, P41, DOI 10.1586/17469899.1.1.41;DOHLMAN CLAES H., 2002, CLAO JOURNAL, V28, P72;GARCIA JPS, 2008, CORNEA, V27, P180, DOI 10.1097/ICO.0B013E318159BC7D;GILVARRY A M E, 1989, …	PURPOSE:TO ANALYZE IRIS BEHAVIOR AND ANGLE STATUS USING SERIAL ANTERIOR SEGMENT OPTICAL COHERENCE TOMOGRAPHY (AS-OCT) AFTER BOSTON KERATOPROSTHESIS (KPRO).METHODS:A PROSPECTIVE CASES SERIES CONSISTED OF 11 EYES WITH IMPLANTED TYPE 1 KPRO AT A TERTIARY CARE INSTITUTION. THE PATIENTS UNDERWENT PREOPERATIVE AND SERIAL POSTOPERATIVE AS-OCT IMAGING. THE MAIN OUTCOME MEASURES INCLUDED ANTERIOR CHAMBER …				1369	UNIV ILLINOIS, DEPT OPHTHALMOL & VISUAL SCI, CHICAGO, IL 60612 USA.; UNIV FED SAO PAULO, DEPT OPHTHALMOL, SAO PAULO, BRAZIL.;	UNIVERSITY OF ILLINOIS SYSTEM; UNIVERSITY OF ILLINOIS CHICAGO; UNIVERSITY OF ILLINOIS CHICAGO HOSPITAL; UNIVERSIDADE FEDERAL DE SAO PAULO (UNIFESP)					2024-02-18	BOSTON KERATOPROSTHESIS; ANTERIOR SEGMENT OPTICAL COHERENCE TOMOGRAPHY; ANGLE CLOSURE	10.1097/ICO.0b013e3182a0cff5	ARTICLE				MCORTINA@UIC.EDU	1374				222QU	POST-PENETRATING-KERATOPLASTY; UNIVERSITY-OF-CALIFORNIA; TYPE-1 KERATOPROSTHESIS; ULTRASOUND BIOMICROSCOPY; GLAUCOMA; PREVENTION; EXPERIENCE; OUTCOMES; CLOSURE; VISION	10	CORNEA	CORNEA	ENGLISH	19		ALLEMANN, NORMA/0000-0001-5432-4287; CORTINA, MARIA/0000-0001-7684-3424	530 WALNUT ST, PHILADELPHIA, PA 19106-3621 USA	OCT	6	PHILADELPHIA	23974896	J	LIPPINCOTT WILLIAMS & WILKINS	2013	ALLEMANN, NORMA/K-5451-2013; DE LA CRUZ, JOSE J/A-1994-2010	CORTINA, MS (CORRESPONDING AUTHOR), UNIV ILLINOIS, DEPT OPHTHALMOL & VISUAL SCI, 1855 W TAYLOR ST, CHICAGO, IL 60612 USA.	OPHTHALMOLOGY			0277-3740	CORNEA
TOMINAGA A;MIKI A;YAMAZAKI Y;MATSUSHITA K;OTORI Y	TOMINAGA, AKIKO;MIKI, ATSUYA;YAMAZAKI, YUKO;MATSUSHITA, KENJI;OTORI, YASUMASA	ADDICKS EM, 1983, ARCH OPHTHALMOL-CHIC, V101, P795;AZUARA-BLANCO A, 1998, SURV OPHTHALMOL, V43, P93, DOI 10.1016/S0039-6257(98)00025-3;CANTOR LB, 2003, J GLAUCOMA, V12, P266, DOI 10.1097/00061198-200306000-00015;HIROOKA K, 2008, ACTA OPHTHALMOL;HUANG D, 1991, SCIENCE, V254, P1178, DOI 10.1126/SCIENCE.1957169;IZATT JA, 1994, ARCH OPHTHALMOL-CHIC, V112, P1584, DOI 10.1001/ARCHOPHT.1994.010902400900…	PURPOSE: TO ASSESS THE USEFULNESS OF ANTERIOR SEGMENT OPTICAL COHERENCE TOMOGRAPHY (AS-OCT) IN EVALUATING POSTOPERATIVE FILTERING BLEB FUNCTION. METHODS: FORTY-EIGHT EYES OF 39 PATIENTS WHO HAD EARLIER UNDERGONE TRABECULECTOMY WERE ENROLLED. BLEBS WERE IMAGED WITH A COMMERCIALLY AVAILABLE AS-OCT SYSTEM. THE CORRELATION BETWEEN INTRAOCULAR PRESSURE (IOP) AND 4 QUANTITATIVE PARAMETERS, BLEB HEIGHT,…				551	OSAKA UNIV, DEPT OPHTHALMOL, SCH MED, SUITA, OSAKA 5650871, JAPAN.; YODOGAWA CHRISTIANS HOSP, DEPT OPHTHALMOL, OSAKA, JAPAN.; HOSHIGAOKA KOSEINENKIN HOSP, DEPT OPHTHALMOL, OSAKA, JAPAN.; OSAKA NATL HOSP, DEPT OPHTHALMOL, OSAKA, JAPAN.;	OSAKA UNIVERSITY; OSAKA NATIONAL HOSPITAL					2024-02-18	GLAUCOMA; FILTERING SURGERY; TRABECULECTOMY; BLEB; OCT	10.1097/IJG.0b013e3181ca76f3	ARTICLE				AMIKI@OPHTHAL.MED.OSAKA-U.AC.JP	555				664TU	TRABECULECTOMY BLEBS; SURGERY; SCALE	8	J GLAUCOMA	J. GLAUCOMA	ENGLISH	17			530 WALNUT ST, PHILADELPHIA, PA 19106-3621 USA	OCT-NOV	5	PHILADELPHIA	20164798	J	LIPPINCOTT WILLIAMS & WILKINS	2010	MATSUSHITA, KENJI/JJD-5360-2023	MIKI, A (CORRESPONDING AUTHOR), OSAKA UNIV, DEPT OPHTHALMOL, SCH MED, ROOM E7,2-2 YAMADAOKA, SUITA, OSAKA 5650871, JAPAN.	OPHTHALMOLOGY			1057-0829	JOURNAL OF GLAUCOMA
MATSUMOTO M;INOUE T;KOJIMA S;NAKASHIMA KI;FUKUSHIMA A;TANIHARA H	MATSUMOTO, MOMOKA;INOUE, TOSHIHIRO;KOJIMA, SACHI;NAKASHIMA, KEI-ICHI;FUKUSHIMA, AYAKO;TANIHARA, HIDENOBU	AWAI-KASAOKA N, 2013, JPN J OPHTHALMOL, V57, P514, DOI 10.1007/S10384-013-0257-5;CANTOR LB, 2003, J GLAUCOMA, V12, P266, DOI 10.1097/00061198-200306000-00015;CHO HK, 2015, EYE, V29, P1220, DOI 10.1038/EYE.2015.129;HAMANAKA T, 2013, INVEST OPHTH VIS SCI, V54, P6536, DOI 10.1167/IOVS.13-12439;INOUE T, 2012, INVEST OPHTH VIS SCI, V53, P8288, DOI 10.1167/IOVS.12-10941;INOUE T, 2012, JPN J OPHTHALMOL,…	OBJECTIVE: TO EVALUATE TIME-DEPENDENT CHANGES IN FILTERING BLEB PARAMETERS USING 3-DIMENSIONAL ANTERIOR SEGMENT OPTICAL COHERENCE TOMOGRAPHY (3-D AS-OCT) IN HIGH-RISK EYES AFTER A LIMBAL-BASED TRABECULECTOMY PROCEDURE. DESIGN: PROSPECTIVE, OBSERVATIONAL STUDY. PARTICIPANTS: TWENTY-THREE PATIENTS WHO UNDERWENT UNCOMBINED LIMBAL-BASED TRABECULECTOMY SURGERY AND WHO ALSO HAD A HISTORY OF PRIOR INTRA…				431	KUMAMOTO UNIV, FAC LIFE SCI, DEPT OPHTHALMOL, 1-1-1 HONJO, KUMAMOTO 8608556, JAPAN.; JAPANESE OPHTHALMOL SOC, SAPPORO, HOKKAIDO, JAPAN.;	KUMAMOTO UNIVERSITY		SAPPORO, JAPAN	119TH ANNUAL MEETING OF THE JAPANESE-OPHTHALMOLOGICAL-SOCIETY	APR 16-18, 2015	2024-02-18		10.1016/j.jcjo.2016.05.019	ARTICLE; PROCEEDINGS PAPER			1715-3360	NOEL@DA2.SO-NET.NE.JP	437				EI9GD	OPTICAL COHERENCE TOMOGRAPHY; OPEN-ANGLE GLAUCOMA; FILTERING BLEBS; MITOMYCIN-C; TRABECULECTOMY BLEBS; AQUEOUS-HUMOR; APPEARANCE; OPENINGS; SURGERY	6	CAN J OPHTHALMOL	CAN. J. OPTHALMOL.-J. CAN. OPTHALMOL.	ENGLISH	30		INOUE, TOSHIHIRO/0000-0003-3769-7609	1525 CARLING AVE SUITE 610, OTTAWA, ONTARIO K1Z 8R9, CANADA	DEC	7	OTTAWA	27938954	J	CANADIAN OPHTHAL SOC	2016		INOUE, T (CORRESPONDING AUTHOR), KUMAMOTO UNIV, FAC LIFE SCI, DEPT OPHTHALMOL, 1-1-1 HONJO, KUMAMOTO 8608556, JAPAN.	OPHTHALMOLOGY			0008-4182	CANADIAN JOURNAL OF OPHTHALMOLOGY-JOURNAL CANADIEN D OPHTALMOLOGIE
KHANDUJA S;BANSAL N;ARORA V;SOBTI A;GARG S;DADA T	KHANDUJA, SUMEET;BANSAL, NIKHIL;ARORA, VISHAL;SOBTI, AMIT;GARG, SATPAL;DADA, TANUJ	ANSEM RPJ, 1987, DOC OPHTHALMOL, V67, P19, DOI 10.1007/BF00142693;BERLER DK, 1979, ARCH OPHTHALMOL-CHIC, V97, P1518;BURTON TC, 1977, AM J OPHTHALMOL, V83, P59, DOI 10.1016/0002-9394(77)90192-1;CETIN E, 2006, J REFRACT SURG, V22, P494, DOI 10.3928/1081-597X-20060501-12;DADA T, 2007, J CATARACT REFR SURG, V33, P837, DOI 10.1016/J.JCRS.2007.01.021;DOI N, 1999, JPN J OPHTHALMOL, V43, P232, DOI 10.101…	PURPOSE: TO EVALUATE THE CHANGE IN ANTERIOR CHAMBER ANGLE PARAMETERS AFTER SCLERAL BUCKLING SURGERY USING ANTERIOR SEGMENT OPTICAL COHERENCE TOMOGRAPHY (ASOCT). METHODS: FIFTY-FIVE PHAKIC EYES OF 55 SUBJECTS UNDERGOING SCLERAL BUCKLING WITH THE PLACEMENT OF AN ENCIRCLING BAND FOR PRIMARY RHEGMATOGENOUS RETINAL DETACHMENT WERE INCLUDED IN THIS STUDY. ANTERIOR CHAMBER ANGLE ASSESSMENT WAS PERFORMED…				267	ALL INDIA INST MED SCI, DR RAJENDRA PRASAD CTR OPHTHALM SCI, NEW DELHI 110029, INDIA.;	ALL INDIA INSTITUTE OF MEDICAL SCIENCES (AIIMS) NEW DELHI; DR. RAJENDRA PRASAD CENTRE FOR OPHTHALMIC SCIENCES					2024-02-18	ANTERIOR SEGMENT OPTICAL COHERENCE TOMOGRAPHY; SCLERAL BUCKLING; ANGLE CLOSURE	10.1097/IJG.0b013e318239c374	ARTICLE			1536-481X	TANUJDADA@GMAIL.COM	271				CE9ZQ	RHEGMATOGENOUS RETINAL-DETACHMENT; CILIARY BODY; ULTRASOUND BIOMICROSCOPY; SURGERY; GLAUCOMA; OPERATIONS; SEGMENT	4	J GLAUCOMA	J. GLAUCOMA	ENGLISH	18			TWO COMMERCE SQ, 2001 MARKET ST, PHILADELPHIA, PA 19103 USA	APR-MAY	5	PHILADELPHIA	23337432	J	LIPPINCOTT WILLIAMS & WILKINS	2015	BANSAL, NIKHIL/AAD-7923-2020	DADA, T (CORRESPONDING AUTHOR), ALL INDIA INST MED SCI, DR RAJENDRA PRASAD CTR OPHTHALM SCI, NEW DELHI 110029, INDIA.	OPHTHALMOLOGY			1057-0829	JOURNAL OF GLAUCOMA
GARCIA JPS;DE LA CRUZ J;ROSEN RB;BUXTON DE	GARCIA, JULIAN P. S., JR.;DE LA CRUZ, JOSE;ROSEN, RICHARD B.;BUXTON, DOUGLAS E.	ANONYMOUS, 1995, ULTRASOUND BIOMICROS;AQUAVELLA JV, 2006, CORNEA, V25, P656, DOI 10.1097/01.ICO.0000214226.36485.D2;DOANE MG, 1996, CORNEA, V15, P179, DOI 10.1097/00003226-199603000-00011;DOHLMAN CLAES H., 2002, CLAO JOURNAL, V28, P72;GARCIA JPS, 2005, OPHTHAL SURG LAS IM, V36, P139;GARCIA JPS, 2007, OPHTHAL SURG LAS IM, V38, P314, DOI 10.3928/15428877-20070701-07;HICKS CR, 1997, SURV OPHTHALMOL,…	PURPOSE: TO DESCRIBE THE ANTERIOR OCULAR SEGMENT FINDINGS OF EYES WITH IMPLANTED BOSTON TYPE 1 KERATOPROSTHESES (KPRO) IN VIVO BY USING ANTERIOR-SEGMENT OPTICAL COHERENCE TOMOGRAPHY (AS-OCT) AND ULTRASOUND BIOMICROSCOPY (UBM). METHODS: A RETROSPECTIVE, COMPARATIVE STUDY WAS MADE OF PATIENTS WITH IMPLANTED KPROS WHO WERE EXAMINED WITH AS-OCT (AC CORNEA OCT) AND UBM (OTI SCAN 35-50MHZ ULTRASOUND). …				180	NEW YORK EYE & EAR INFIRM, RETINA CTR, NEW YORK, NY 10003 USA.; NEW YORK MED COLL, VALHALLA, NY 10595 USA.; ILLINOIS EYE & EAR INFIRM, CHICAGO, IL USA.;	NEW YORK EYE & EAR INFIRMARY OF MOUNT SINAI; NEW YORK MEDICAL COLLEGE		FT LAUDERDALE, FL	ANNUAL MEETING OF THE ASSOCIATION-FOR-RESEARCH-IN-VISION-AND-OPHTHALMOLOGY	MAY 06-10, 2007	2024-02-18	ANTERIOR-SEGMENT OPTICAL COHERENCE TOMOGRAPHY; CORONAL OPTICAL COHERENCE TOMOGRAPHY; OPTICAL COHERENCE TOMOGRAPHY; KERATOPROSTHESIS; ULTRASOUND BIOMICROSCOPY	10.1097/ICO.0b013e318159bc7d	ARTICLE; PROCEEDINGS PAPER				JGARCIA@NYEE.EDU	188				255BH		2	CORNEA	CORNEA	ENGLISH	14			530 WALNUT ST, PHILADELPHIA, PA 19106-3621 USA	FEB	9	PHILADELPHIA	18216573	J	LIPPINCOTT WILLIAMS & WILKINS	2008	DE LA CRUZ, JOSE J/A-1994-2010	GARCIA, JPS (CORRESPONDING AUTHOR), NEW YORK EYE & EAR INFIRM, RETINA CTR, 310 E 14TH ST, NEW YORK, NY 10003 USA.	OPHTHALMOLOGY			0277-3740	CORNEA
ANG GS;WELLS AP	ANG, GHEE S.;WELLS, ANTHONY P.	BONOMI L, 2000, OPHTHALMOLOGY, V107, P998, DOI 10.1016/S0161-6420(00)00022-1;CARONIA RM, 1996, AM J OPHTHALMOL, V122, P53, DOI 10.1016/S0002-9394(14)71963-4;CONSOLE JW, 2008, BRIT J OPHTHALMOL, V92, P1612, DOI 10.1136/BJO.2007.129932;DADA T, 2007, EYE, V21, P956, DOI 10.1038/SJ.EYE.6702360;GAZZARD G, 2003, OPHTHALMOLOGY, V110, P630, DOI 10.1016/S0161-6420(02)01893-6;HE MG, 2007, OPHTHALMOLOGY, V1…	BACKGROUND: TO EVALUATE BY ANTERIOR SEGMENT OPTICAL COHERENCE TOMOGRAPHY (AS-OCT) THE CHANGES IN THE ANTERIOR CHAMBER STRUCTURES IN CAUCASIAN EYES AFTER LASER PERIPHERAL IRIDOTOMY (PI). METHODS: RETROSPECTIVE STUDY OF CONSECUTIVE CAUCASIAN PRIMARY ANGLE CLOSURE SUSPECT (PACS), PRIMARY ANGLE CLOSURE (PAC) OR PRIMARY ANGLE CLOSURE GLAUCOMA (PACG) PATIENTS WHO UNDERWENT LASER PI OVER A 25-MONTH PERI…				778	CAPITAL EYE SPECIALISTS, WELLINGTON 6011, NEW ZEALAND.;						2024-02-18	ANGLE CLOSURE; ANTERIOR SEGMENT OPTICAL COHERENCE TOMOGRAPHY; LASER PERIPHERAL IRIDOTOMY	10.1111/j.1442-9071.2010.02360.x	ARTICLE				GSANG1@DOCTORS.ORG.UK	785		CAPITAL VISION RESEARCH TRUST, WELLINGTON, NEW ZEALAND	THIS RESEARCH WAS FUNDED BY CAPITAL VISION RESEARCH TRUST, WELLINGTON, NEW ZEALAND.	676VJ	PRIMARY ANGLE-CLOSURE; ULTRASOUND BIOMICROSCOPY; QUANTITATIVE-ANALYSIS; PUPILLARY BLOCK; ASIAN EYES; LIWAN EYE; GLAUCOMA; CHAMBER; PREVALENCE; IRIS	8	CLIN EXP OPHTHALMOL	CLIN. EXP. OPHTHALMOL.	ENGLISH	29			COMMERCE PLACE, 350 MAIN ST, MALDEN 02148, MA USA	NOV	8	MALDEN	20572815	J	WILEY-BLACKWELL PUBLISHING, INC	2010		ANG, GS (CORRESPONDING AUTHOR), CAPITAL EYE SPECIALISTS, LEVEL 2,148 CUBA ST, WELLINGTON 6011, NEW ZEALAND.	OPHTHALMOLOGY			1442-6404	CLINICAL AND EXPERIMENTAL OPHTHALMOLOGY
PARK SB;SUNG KR;KANG SY;JO JW;LEE KS;KOOK MS	PARK, SEONG BAE;SUNG, KYUNG RIM;KANG, SUNG YUNG;JO, JUNG WOO;LEE, KYOUNG SUB;KOOK, MICHAEL S.	ALSAGOFF Z, 2000, OPHTHALMOLOGY, V107, P2300, DOI 10.1016/S0161-6420(00)00385-7;ALSBIRK PH, 1976, ACTA OPHTHALMOL, P5;ALSBIRK PH, 1975, ACTA OPHTHALMOL, V53, P89;DANDONA L, 2000, OPHTHALMOLOGY, V107, P1710, DOI 10.1016/S0161-6420(00)00274-8;FOSTER PAUL J, 2002, SEMIN OPHTHALMOL, V17, P50;FOSTER PJ, 1996, ARCH OPHTHALMOL-CHIC, V114, P1235, DOI 10.1001/ARCHOPHT.1996.01100140435011;FOSTER PJ, 2000, …	TO EVALUATE ANTERIOR CHAMBER (AC) ANGLES USING GONIOSCOPY, VAN HERICK TECHNIQUE AND ANTERIOR SEGMENT OPTICAL COHERENCE TOMOGRAPHY (AS-OCT). ONE HUNDRED FORTY-EIGHT CONSECUTIVE SUBJECTS WERE ENROLLED. THE AGREEMENT BETWEEN ANY TWO OF THREE DIAGNOSTIC METHODS, GONIOSCOPY, AS-OCT AND VAN HERICK, WAS CALCULATED IN NARROW-ANGLE PATIENTS. THE AREA UNDER RECEIVER-OPERATING CHARACTERISTIC CURVES (AUC) FO…				343	UNIV ULSAN, DEPT OPHTHALMOL, COLL MED, ASAN MED CTR, SEOUL 138736, SOUTH KOREA.; BS EYE CTR, SEOUL, SOUTH KOREA.;	UNIVERSITY OF ULSAN					2024-02-18	GONIOSCOPY; VAN HERICK METHOD; ANTERIOR SEGMENT OPTICAL COHERENCE TOMOGRAPHY	10.1007/s10384-011-0036-0	ARTICLE			1613-2246	MSKOOK@AMC.SEOUL.KR	350				801YL	CLOSURE GLAUCOMA; ULTRASOUND BIOMICROSCOPY; CHAMBER DEPTH; ASIAN EYES; POPULATION; INTRAOBSERVER; PREVALENCE; DISTRICT; CHINESE; IMAGES	4	JPN J OPHTHALMOL	JPN. J. OPHTHALMOL.	ENGLISH	28			CHIYODA FIRST BLDG EAST, 3-8-1 NISHI-KANDA, CHIYODA-KU, TOKYO, 101-0065, JAPAN	JUL	8	TOKYO	21626304	J	SPRINGER JAPAN KK	2011		KOOK, MS (CORRESPONDING AUTHOR), UNIV ULSAN, DEPT OPHTHALMOL, COLL MED, ASAN MED CTR, 388-1 PUNGNAP 2 DONG, SEOUL 138736, SOUTH KOREA.	OPHTHALMOLOGY			0021-5155	JAPANESE JOURNAL OF OPHTHALMOLOGY
HUANG GF;GONZALEZ E;PENG PH;LEE R;LEEUNGURASATIEN T;HE MG;PORCO T;LIN SC	HUANG, GUOFU;GONZALEZ, EDUARDO;PENG, PAI-HUEI;LEE, ROLAND;LEEUNGURASATIEN, THIDARAT;HE, MINGGUANG;PORCO, TRAVIS;LIN, SHAN C.	ALTAN C, 2004, J CATARACT REFR SURG, V30, P832, DOI 10.1016/J.JCRS.2003.08.023;BASKARAN M, 2009, OPHTHALMOLOGY, V116, P2300, DOI 10.1016/J.OPHTHA.2009.06.010;CASSON RJ, 2002, J CATARACT REFR SURG, V28, P2159, DOI 10.1016/S0886-3350(02)01501-8;CONSOLE JW, 2008, BRIT J OPHTHALMOL, V92, P1612, DOI 10.1136/BJO.2007.129932;EPSTEIN DL, 1978, AM J OPHTHALMOL, V86, P101, DOI 10.1016/0002-9394(78)90023-5;…	OBJECTIVE: TO DETERMINE THE ASSOCIATION OF CHANGES IN ANTERIOR CHAMBER ANGLE AND ANTERIOR CHAMBER DEPTH (ACD) WITH INTRAOCULAR PRESSURE (IOP) REDUCTION AFTER UNCOMPLICATED PHACOEMULSIFICATION. METHODS: IN THIS PROSPECTIVE STUDY, SUBJECTS UNDERWENT PHACOEMULSIFICATION WITH FOLDABLE LENS IMPLANTATION. ANTERIOR CHAMBER ANGLE GRADING OF 2 OR LESS (SHAFFER GRADING) IN 3 OR ALL QUADRANTS WAS CONSIDERED…				1283	UNIV CALIF SAN FRANCISCO, DEPT OPHTHALMOL, SAN FRANCISCO SCH MED, SAN FRANCISCO, CA 94143 USA.; SUN YAT SEN UNIV, STATE KEY LAB OPHTHALMOL, ZHONGSHAN OPHTHALM CTR, GUANGZHOU 510275, GUANGDONG, PEOPLES R CHINA.; SHIN KONG WU HO SU MEM HOSP, DEPT OPHTHALMOL, TAIPEI, TAIWAN.;	UNIVERSITY OF CALIFORNIA SYSTEM; UNIVERSITY OF CALIFORNIA SAN FRANCISCO; SUN YAT SEN UNIVERSITY; SHIN KONG WU HO SU MEMORIAL HOSPITAL					2024-02-18		10.1001/archophthalmol.2011.272	ARTICLE			1538-3601	LINS@VISION.UCSF.EDU	1290		NATIONAL EYE INSTITUTE [EY002162]; MAN MAY SEE INC; RESEARCH TO PREVENT BLINDNESS	THIS STUDY WAS SUPPORTED BY CORE GRANT EY002162 FROM THE NATIONAL EYE INSTITUTE, THAT MAN MAY SEE INC, AND RESEARCH TO PREVENT BLINDNESS.	830ZB	OPTICAL COHERENCE TOMOGRAPHY; CLOSURE GLAUCOMA; LENS IMPLANTATION; CATARACT-SURGERY; COMBINED PHACOTRABECULECTOMY; ULTRASOUND BIOMICROSCOPY; AQUEOUS OUTFLOW; SCLERAL SPUR; SEGMENT; EYES	10	ARCH OPHTHALMOL-CHIC	ARCH. OPHTHALMOL.	ENGLISH	44		HE, MINGGUANG/0000-0002-6912-2810; LEE, ROLAND/0000-0002-6351-3562	330 N WABASH AVE, STE 39300, CHICAGO, IL 60611-5885 USA	OCT	8	CHICAGO	21987670	J	AMER MEDICAL ASSOC	2011	HE, MING/HZM-5794-2023; HE, MINGGUANG/AAY-5239-2020; HE, MING/JDN-0835-2023	LIN, SC (CORRESPONDING AUTHOR), UNIV CALIF SAN FRANCISCO, DEPT OPHTHALMOL, SAN FRANCISCO SCH MED, 10 KORET ST,POB 0730, SAN FRANCISCO, CA 94143 USA.	OPHTHALMOLOGY			0003-9950	ARCHIVES OF OPHTHALMOLOGY
LI DJ;WANG NL;WANG BS;WANG T;LI SN;CHEN LJ;MU DP	LI, DEJIAO;WANG, NINGLI;WANG, BINGSONG;WANG, TAO;LI, SHUNING;CHEN, LIJIA;MU, DAPENG	ANG LPK, 2000, OPHTHALMOLOGY, V107, P2092, DOI 10.1016/S0161-6420(00)00360-2;BARKANA Y, 2007, ARCH OPHTHALMOL-CHIC, V125, P1331, DOI 10.1001/ARCHOPHT.125.10.1331;CONGDON N, 1995, AM J CLIN NUTR, V61, P1076, DOI 10.1093/AJCN/61.5.1076;CONGDON NATHAN G, 2003, CURR OPIN OPHTHALMOL, V14, P70, DOI 10.1097/00055735-200304000-00002;CONGDON NG, 2000, AM J CLIN NUTR, V72, P1004;FOSTER PJ, 2000, ARCH OPHTH…	PURPOSE: TO STUDY THE ASSOCIATIONS BETWEEN CHANGES IN PUPIL DIAMETER AND IN THE ANTERIOR CHAMBER ANGLE CONFIGURATION DURING THE DARK ROOM PROVOCATIVE TEST. METHODS: THE STUDY INCLUDED 70 SUSPECTS OF PRIMARY ANGLE CLOSURE (STUDY GROUP) AND 40 NORMAL PARTICIPANTS (CONTROL GROUP). USING ANTERIOR-SEGMENT OPTICAL COHERENCE TOMOGRAPHY (AS-OCT), WE MEASURED THE ANTERIOR CHAMBER ANGLE CONFIGURATION AND P…				331	CAPITAL UNIV MED SCI, BEIJING TONGREN HOSP, TONGREN EYE CTR, BEIJING 100730, PEOPLES R CHINA.; CAPITAL UNIV MED SCI, DEPT OPHTHALMOL, CHINA JAPAN FIENDSHIP HOSP, BEIJING 100730, PEOPLES R CHINA.; CHINESE UNIV HONG KONG, DEPT OPHTHALMOL & VISUAL SCI, HONG KONG, HONG KONG, PEOPLES R CHINA.;	CAPITAL MEDICAL UNIVERSITY; CAPITAL MEDICAL UNIVERSITY; CHINESE UNIVERSITY OF HONG KONG					2024-02-18	PUPIL DIAMETER; DARKROOM PROVOCATIVE TEST; PRIMARY ANGLE CLOSURE GLAUCOMA; ANTERIOR SEGMENT OPTICAL COHERENCE TOMOGRAPHY	10.1097/IJG.0b013e3181eda73a	ARTICLE			1536-481X	LIDEJIAO1973@SINA.COM	335		MINISTRY OF SCIENCE AND TECHNOLOGY OF THE PEOPLE'S REPUBLIC OF CHINA [2007BAI18B08]	SUPPORTED BY THE NATIONAL 11TH FIVE-YEAR PLAN SCIENCE AND TECHNOLOGY SUPPORTING PROGRAMS, THE MINISTRY OF SCIENCE AND TECHNOLOGY OF THE PEOPLE'S REPUBLIC OF CHINA. GRANT NO. 2007BAI18B08.	801NJ	OPTICAL COHERENCE TOMOGRAPHY; CLOSURE GLAUCOMA; ANTERIOR-CHAMBER; VITAMIN-A; ULTRASOUND BIOMICROSCOPY; POPULATION; RESPONSIVENESS; THRESHOLD; CHILDREN; CHINESE	6	J GLAUCOMA	J. GLAUCOMA	ENGLISH	26		MU, DAPENG/0000-0002-4237-4559	TWO COMMERCE SQ, 2001 MARKET ST, PHILADELPHIA, PA 19103 USA	AUG	5	PHILADELPHIA	21811135	J	LIPPINCOTT WILLIAMS & WILKINS	2011	MU, DAPENG/IUO-5738-2023	WANG, NL (CORRESPONDING AUTHOR), CAPITAL UNIV MED SCI, BEIJING TONGREN HOSP, TONGREN EYE CTR, 2 CHONGNEI ST, BEIJING 100730, PEOPLES R CHINA.	OPHTHALMOLOGY			1057-0829	JOURNAL OF GLAUCOMA
DEOKULE S;ALENCAR L;VIZZERI G;MEDEIROS F;WEINREB RN	DEOKULE, SUNIL;ALENCAR, LUCIANA;VIZZERI, GIANMARCO;MEDEIROS, FELIPE;WEINREB, ROBERT N.	CONSOLE JW, 2008, BRIT J OPHTHALMOL, V92, P1612, DOI 10.1136/BJO.2007.129932;DADA T, 2007, J CATARACT REFR SURG, V33, P837, DOI 10.1016/J.JCRS.2007.01.021;ISHIKAWA H, 2000, CURR OPIN OPHTHALMOL, V11, P133, DOI 10.1097/00055735-200004000-00012;LI HT, 2007, BRIT J OPHTHALMOL, V91, P1490, DOI 10.1136/BJO.2007.118901;MÜLLER M, 2006, J CATARACT REFR SURG, V32, P1803, DOI 10.1016/J.JCRS.2006.07.014;NOL…	BACKGROUND AND OBJECTIVE: TO COMPARE THE INTRAOBSERVER AND INTEROBSERVER AGREEMENT OF ANTERIOR CHAMBER ANGLE MEASUREMENTS USING UNENHANCED AND ENHANCED IMAGING PROTOCOLS FOR ANTERIOR SEGMENT OPTICAL COHERENCE TOMOGRAPHY (AS-OCT). PATIENTS AND METHODS: ANTERIOR SEGMENTS OF 30 EYES OF 15 HEALTHY SUBJECTS (MEAN AGE: 33.8 +/- 13.0 YEARS, 8 WOMEN) WERE IMAGED BY A SINGLE EXAMINER WITH AS-OCT USING UNE…				39	UNIV KENTUCKY, KENTUCKY CLIN, DEPT OPHTHALMOL & VISUAL SCI, LEXINGTON, KY 40536 USA.; UNIV CALIF SAN DIEGO, HAMILTON GLAUCOMA CTR, LA JOLLA, CA 92093 USA.; UNIV TEXAS MED BRANCH, DEPT OPHTHALMOL & VISUAL SCI, GALVESTON, TX USA.;	UNIVERSITY OF KENTUCKY; UNIVERSITY OF CALIFORNIA SYSTEM; UNIVERSITY OF CALIFORNIA SAN DIEGO; UNIVERSITY OF TEXAS SYSTEM; UNIVERSITY OF TEXAS MEDICAL BRANCH GALVESTON					2024-02-18		10.3928/15428877-20111027-01	ARTICLE			1938-2375	SPDEOKULE@GMAIL.COM	44				959VA	ULTRASOUND BIOMICROSCOPY; CLOSURE; REPRODUCIBILITY	1	OPHTHAL SURG LAS IM	OPHTHALMIC SURG. LASERS IMAGING	ENGLISH	13		ALENCAR, LUCIANA M/0000-0001-8785-5340	6900 GROVE RD, THOROFARE, NJ 08086 USA	JAN-FEB	6	THOROFARE	22128766	J	SLACK INC	2012	ALENCAR, LUCIANA M/H-3741-2013	DEOKULE, S (CORRESPONDING AUTHOR), UNIV KENTUCKY, KENTUCKY CLIN, DEPT OPHTHALMOL & VISUAL SCI, E-328, LEXINGTON, KY 40536 USA.	OPHTHALMOLOGY; SURGERY			1542-8877	OPHTHALMIC SURGERY LASERS & IMAGING
YOSHIHARA N;TERASAKI H;SHIIHARA H;FUNATSU R;YAMASHITA T;SAKAMOTO T	YOSHIHARA, NAOYA;TERASAKI, HIROTO;SHIIHARA, HIDEKI;FUNATSU, RYOH;YAMASHITA, TAKEHIRO;SAKAMOTO, TAIJI	AGARWAL A, 2009, AM J OPHTHALMOL, V147, P413, DOI 10.1016/J.AJO.2008.09.024;AGRAWAL R, 2016, ACTA OPHTHALMOL, V94, PE135, DOI 10.1111/AOS.12833;JABS DA, 2005, AM J OPHTHALMOL, V140, P509, DOI 10.1016/J.AJO.2005.03.057;KHURANA RN, 2007, OPHTHALMOLOGY, V114, P1278, DOI 10.1016/J.OPHTHA.2006.10.033;KOIZUMI N, 2008, OPHTHALMOLOGY, V115, P292, DOI 10.1016/J.OPHTHA.2007.04.053;KONSTANTOPOULOU K, 2015, …	PURPOSE: TO DETERMINE WHETHER THE DEGREE OF PARTICLE DENSITY IN THE ANTERIOR CHAMBER CAN BE EVALUATED OBJECTIVELY AND QUANTITATIVELY BY ANTERIOR SEGMENT OPTICAL COHERENCE TOMOGRAPHY (AS-OCT) IN CASES AFTER LASER IRIDOTOMY (LI). METHODS: THIS WAS A RETROSPECTIVE OBSERVATIONAL STUDY. ALL OF THE SUBJECTS WHO RECEIVED LI FOR ANGLE-CLOSURE GLAUCOMA BETWEEN JANUARY 2018 AND MAY 2019 AT KAGOSHIMA UNIVER…	4379				KAGOSHIMA UNIV, DEPT OPHTHALMOL, GRAD SCH MED & DENT SCI, KAGOSHIMA 8908520, JAPAN.;	KAGOSHIMA UNIVERSITY					2024-02-18	ANTERIOR SEGMENT OPTICAL COHERENCE TOMOGRAPHY; ANTERIOR CHAMBER; OBJECTIVE QUANTIFICATION; LASER IRIDOTOMY	10.3390/jcm11154379	ARTICLE			2077-0383	YOSHIHARA_EYE@YAHOO.CO.JP; TERACCHI@M2.KUFM.KAGOSHIMA-U.AC.JP; 58149@M2.KUFM.KAGOSHIMA-U.AC.JP; K7890207@KADAI.JP; TAKEL@PO4.SYNAPSE.NE.JP; TSAKAMOT@M3.KUFM.KAGOSHIMA-U.AC.JP			JSPS KAKENHI [21H03095]	THE FUNDING ORGANIZATIONS HAD NO ROLE IN THE DESIGN OR CONDUCTION OF THIS RESEARCH. THIS STUDY WAS SUPPORTED BY JSPS KAKENHI, GRANT NUMBER 21H03095.	3R9AE	RESIDUAL SILICONE OIL; BINARIZATION; INFLAMMATION; EYES	15	J CLIN MED	J. CLIN. MED.	ENGLISH	19	GREEN PUBLISHED, GOLD	YAMASHITA, TAKEHIRO/0000-0001-7801-2317; FUNATSU, RYOH/0000-0002-5771-6718	ST ALBAN-ANLAGE 66, CH-4052 BASEL, SWITZERLAND	AUG	9	BASEL	35955996	J	MDPI	2022	YAMASHITA, TAKEHIRO/JJF-2937-2023	TERASAKI, H (CORRESPONDING AUTHOR), KAGOSHIMA UNIV, DEPT OPHTHALMOL, GRAD SCH MED & DENT SCI, KAGOSHIMA 8908520, JAPAN.	GENERAL & INTERNAL MEDICINE				JOURNAL OF CLINICAL MEDICINE
HAN SB;WOO SJ;HYON JY	HAN, SANG BEOM;WOO, SE JOON;HYON, JOON YOUNG	CHENG ACK, 2004, OPHTHALMOLOGY, V111, P768, DOI 10.1016/J.OPHTHA.2003.06.029;DAWSON DG, 2007, OPHTHALMOLOGY, V114, P1848, DOI 10.1016/J.OPHTHA.2007.01.029;EMARA B, 1998, J CATARACT REFR SURG, V24, P1320, DOI 10.1016/S0886-3350(98)80222-8;FRUCHT-PERY J, 2007, J REFRACT SURG, V23, P244;GALAL A, 2006, J REFRACT SURG, V22, P441, DOI 10.3928/1081-597X-20060501-04;HAMILTON DR, 2002, OPHTHALMOLOGY, V109…	A 40-YEAR-OLD MAN WITH A HISTORY OF LASER IN SITU KERATOMILEUSIS (LASIK) 13 YEARS EARLIER HAD COMBINED CATARACT EXTRACTION AND VITREORETINAL SURGERY DUE TO RHEGMATOGENOUS RETINAL DETACHMENT AND POSTERIOR SUBCAPSULAR CATARACT. TWO WEEKS POSTOPERATIVELY, HE COMPLAINED OF PAINLESS VISUAL BLURRING. DIFFUSE INTERFACE HAZE WAS OBSERVED, AND ANTIINFLAMMATORY TREATMENT INCLUDING TOPICAL STEROID AND CYCLO…				548	SEOUL NATL UNIV, DEPT OPHTHALMOL, BUNDANG HOSP, SONGNAM 463707, GYEONGGI, SOUTH KOREA.; SEOUL NATL UNIV, COLL MED, DEPT OPHTHALMOL, SEOUL, SOUTH KOREA.;	SEOUL NATIONAL UNIVERSITY (SNU); SEOUL NATIONAL UNIVERSITY (SNU)					2024-02-18		10.1016/j.jcrs.2011.12.014	ARTICLE				JYHYON@SNU.AC.KR	550				904OS	CONFOCAL MICROSCOPIC FINDINGS; DIFFUSE LAMELLAR KERATITIS; STEROID-INDUCED ELEVATION; INTRAOCULAR-PRESSURE; INDUCED GLAUCOMA; LASIK; EDEMA; EYES	3	J CATARACT REFR SURG	J. CATARACT. REFRACT. SURG.	ENGLISH	15		WOO, JOON/0000-0003-3692-7169; HYON, JOON YOUNG/0000-0003-3620-1536	360 PARK AVE SOUTH, NEW YORK, NY 10010-1710 USA	MAR	3	NEW YORK	22200509	J	ELSEVIER SCIENCE INC	2012	HYON, JOON YOUNG/J-5720-2012; WOO, JOON/I-7357-2013	HYON, JY (CORRESPONDING AUTHOR), SEOUL NATL UNIV, DEPT OPHTHALMOL, BUNDANG HOSP, 300 GUMI DONG, SONGNAM 463707, GYEONGGI, SOUTH KOREA.	OPHTHALMOLOGY; SURGERY			0886-3350	JOURNAL OF CATARACT AND REFRACTIVE SURGERY
LEE YJ;SUN SKY;KIM YK	LEE, YUN JEONG;SUN, SUKKYU;KIM, YOUNG KOOK	ABOU SHOUSHA M, 2011, OPHTHALMOLOGY, V118, P1531, DOI 10.1016/J.OPHTHA.2011.01.005;ANG M, 2018, PROG RETIN EYE RES, V66, P132, DOI 10.1016/J.PRETEYERES.2018.04.002;ASAOKA R, 2019, AM J OPHTHALMOL, V198, P136, DOI 10.1016/J.AJO.2018.10.007;CHAN HP, 2020, ADV EXP MED BIOL, V1213, P3, DOI 10.1007/978-3-030-33128-3_1;CHEFER H, 2021, PROC CVPR IEEE, P782, DOI 10.1109/CVPR46437.2021.00084;CHEN XY, 2015…	INTRODUCTION ANTERIOR SEGMENT OPTICAL COHERENCE TOMOGRAPHY (AS-OCT) IS A NON-CONTACT, RAPID, AND HIGH-RESOLUTION IN VIVO MODALITY FOR IMAGING OF THE EYEBALL'S ANTERIOR SEGMENT STRUCTURES. BECAUSE PROGRESSIVE ANTERIOR SEGMENT DEFORMATION IS A HALLMARK OF CERTAIN EYE DISEASES SUCH AS ANGLE-CLOSURE GLAUCOMA, IDENTIFICATION OF AS-OCT STRUCTURAL CHANGES OVER TIME IS FUNDAMENTAL TO THEIR DIAGNOSIS AND …	0270493				SEOUL NATL UNIV HOSP, DEPT OPHTHALMOL, SEOUL, SOUTH KOREA.; SEOUL NATL UNIV HOSP, BIOMED RES INST, SEOUL, SOUTH KOREA.; SEOUL NATL UNIV, COLL MED, DEPT OPHTHALMOL, SEOUL, SOUTH KOREA.;	SEOUL NATIONAL UNIVERSITY (SNU); SEOUL NATIONAL UNIVERSITY HOSPITAL; SEOUL NATIONAL UNIVERSITY (SNU); SEOUL NATIONAL UNIVERSITY HOSPITAL; SEOUL NATIONAL UNIVERSITY (SNU)					2024-02-18		10.1371/journal.pone.0270493	ARTICLE				MD092@NAVER.COM; SUKKYUSUN@MELAB.SNU.AC.KR					9T8ZP	OPTICAL COHERENCE TOMOGRAPHY; DIABETIC-RETINOPATHY; ANGLE CONFIGURATION; CHAMBER ANGLE; CORNEAL; THICKNESS; AGE; CONJUNCTIVAL; VALIDATION; ALGORITHM	8	PLOS ONE	PLOS ONE	ENGLISH	44	GREEN PUBLISHED, GOLD	LEE, YUN JEONG/0000-0002-4283-5589; KIM, YOUNG KOOK/0000-0002-6037-8449	1160 BATTERY STREET, STE 100, SAN FRANCISCO, CA 94111 USA	AUG 11	9	SAN FRANCISCO	35951641	J	PUBLIC LIBRARY SCIENCE	2022		KIM, YK (CORRESPONDING AUTHOR), SEOUL NATL UNIV HOSP, DEPT OPHTHALMOL, SEOUL, SOUTH KOREA.; SUN, SKY (CORRESPONDING AUTHOR), SEOUL NATL UNIV HOSP, BIOMED RES INST, SEOUL, SOUTH KOREA.; KIM, YK (CORRESPONDING AUTHOR), SEOUL NATL UNIV, COLL MED, DEPT OPHTHALMOL, SEOUL, SOUTH KOREA.	SCIENCE & TECHNOLOGY - OTHER TOPICS			1932-6203	PLOS ONE
LIU P;HIGASHITA R;GUO PY;OKAMOTO K;LI F;NGUYEN A;SAKATA R;DUAN LX;AIHARA M;LIN S;ZHANG XL;LEUNG CKS;LIU J	LIU, PENG;HIGASHITA, RISA;GUO, PHILIP YAWEN;OKAMOTO, KEIICHIRO;LI, FEI;NGUYEN, ANWELL;SAKATA, REI;DUAN, LIXIN;AIHARA, MAKOTO;LIN, SHAN;ZHANG, XIULAN;LEUNG, CHRISTOPHER KAI-SHUN;LIU, JIANG	CHAN PPM, 2020, INVEST OPHTH VIS SCI, V61;CHEN LC, 2018, IEEE T PATTERN ANAL, V40, P834, DOI 10.1109/TPAMI.2017.2699184;CUMBA RJ, 2012, J OPHTHALMOL, V2012, DOI 10.1155/2012/487309;FOSTER PJ, 2002, BRIT J OPHTHALMOL, V86, P238, DOI 10.1136/BJO.86.2.238;FU HZ, 2020, MED IMAGE ANAL, V66, DOI 10.1016/J.MEDIA.2020.101798;FU HZ, 2019, AM J OPHTHALMOL, V203, P37, DOI 10.1016/J.AJO.2019.02.028;FU HZ, 20…	AIMS TO APPLY A DEEP LEARNING MODEL FOR AUTOMATIC LOCALISATION OF THE SCLERAL SPUR (SS) IN ANTERIOR SEGMENT OPTICAL COHERENCE TOMOGRAPHY (AS-OCT) IMAGES AND COMPARE THE REPRODUCIBILITY OF ANTERIOR CHAMBER ANGLE (ACA) WIDTH BETWEEN DEEP LEARNING LOCATED SS (DLLSS) AND MANUALLY PLOTTED SS (MPSS). METHODS IN THIS MULTICENTRE, CROSS-SECTIONAL STUDY, A TEST DATASET COMPRISING 5166 AS-OCT IMAGES FROM 2…				802	UNIV ELECT SCI & TECHNOL CHINA, SCH COMP SCI & ENGN, CHENGDU, PEOPLES R CHINA.; UNIV ELECT SCI & TECHNOL CHINA, SHENZHEN INST ADV STUDY, CHENGDU, PEOPLES R CHINA.; SOUTHERN UNIV SCI & TECHNOL, DEPT COMP SCI & ENGN, SHENZHEN, PEOPLES R CHINA.; TOMEY CORP, NAGOYA, AICHI, JAPAN.; CHINESE UNIV HONG KONG, DEPT OPHTHALMOL & VISUAL SCI, HONG KONG, PEOPLES R CHINA.; SUN YAT SEN UNIV, ZHONGSHAN OPHTHALM C…	UNIVERSITY OF ELECTRONIC SCIENCE & TECHNOLOGY OF CHINA; SHENZHEN INSTITUTE FOR ADVANCED STUDY, UESTC; UNIVERSITY OF ELECTRONIC SCIENCE & TECHNOLOGY OF CHINA; SOUTHERN UNIVERSITY OF SCIENCE & TECHNOLOGY; CHINESE UNIVERSITY OF HONG KONG; SUN YAT SEN UNIVERSITY; UNIVERSITY OF CALIFORNIA SYSTEM; UNIVERSITY OF CALIFORNIA SAN FRANCISCO; UNIVERSITY OF TOKYO; CHINESE ACADEMY OF SCIENCES; SOUTHERN UNIVERS…					2024-02-18	ANTERIOR CHAMBER; GLAUCOMA	10.1136/bjophthalmol-2021-319798	ARTICLE; EARLY ACCESS	JAN 2022		1468-2079	CKSLEUNG.CUHK@GMAIL.COM; LIUJ@SUSTECH.EDU.CN	808		GUANGDONG PROVINCIAL DEPARTMENT OF EDUCATION [2020ZDZX3043]; GUANGDONG PROVINCIAL KEY LABORATORY [2020B121201001]; SHENZHEN NATURAL SCIENCE FUND [JCYJ20200109140820699]; STABLE SUPPORT PLAN PROGRAM [20200925174052004]	THIS WORK WAS SUPPORTED IN PART BY GUANGDONG PROVINCIAL DEPARTMENT OF EDUCATION (2020ZDZX3043), GUANGDONG PROVINCIAL KEY LABORATORY (2020B121201001), AND SHENZHEN NATURAL SCIENCE FUND (JCYJ20200109140820699 AND THE STABLE SUPPORT PLAN PROGRAM 20200925174052004).	L3IL3	CLASSIFICATION; GLAUCOMA; PREVALENCE	6	BRIT J OPHTHALMOL	BR. J. OPHTHALMOL.	ENGLISH	20	HYBRID, GREEN PUBLISHED	LIU, JIANG JIMMY/0000-0001-6281-6505; LIU, PENG/0000-0002-4441-3638; GUO, YAWEN/0000-0002-2893-2630	BRITISH MED ASSOC HOUSE, TAVISTOCK SQUARE, LONDON WC1H 9JR, ENGLAND	2023 JUN	7	LONDON	35091438	J	BMJ PUBLISHING GROUP	2023	AIHARA, MAKOTO/HLW-0815-2023; LI, FEI/ABB-7789-2021; LIU, JIANG JIMMY/AHB-8921-2022	LIU, J (CORRESPONDING AUTHOR), SOUTHERN UNIV SCI & TECHNOL, DEPT COMP SCI & ENGN, SHENZHEN, PEOPLES R CHINA.; LEUNG, CKS (CORRESPONDING AUTHOR), CHINESE UNIV HONG KONG, DEPT OPHTHALMOL & VISUAL SCI, HONG KONG, PEOPLES R CHINA.	OPHTHALMOLOGY			0007-1161	BRITISH JOURNAL OF OPHTHALMOLOGY
XU BY;PARDESHI AA;BURKEMPER B;RICHTER GM;LIN SC;MCKEAN-COWDIN R;VARMA R	XU, BENJAMIN Y.;PARDESHI, ANMOL A.;BURKEMPER, BRUCE;RICHTER, GRACE M.;LIN, SHAN C.;MCKEAN-COWDIN, ROBERTA;VARMA, ROHIT	ANONYMOUS, 2006, ANGLE CLOSURE AND ANGLE CLOSURE GLAUCOMA: REPORTS AND CONSENSUS STATEMENTS OF THE 3RD GLOBAL AIGS CONSENSUS MEETING ON ANGLE CLOSURE GLAUCOMA;APTEL F, 2014, J REFRACT SURG, V30, P354, DOI 10.3928/1081597X-20140326-01;BASKARAN M, 2012, J GLAUCOMA, V21, P493, DOI 10.1097/IJG.0B013E3182183362;BELL NP, 2013, ISRN OPHTHALMOL, V2013;CUMBA RJ, 2012, J OPHTHALMOL, V2012, DOI 10.1155/2012…	PURPOSE: TO EVALUATE THE RELATIONSHIP BETWEEN ANGLE DIMENSIONS ASSESSED BY GONIOSCOPY OR EYECAM AND ANTERIOR SEGMENT OPTICAL COHERENCE TOMOGRAPHY (AS-OCT). METHODS: SUBJECTS AGED 50 YEARS OR OLDER WERE RECRUITED FROM THE CHINESE AMERICAN EYE STUDY (CHES). EACH SUBJECT UNDERWENT A COMPLETE OCULAR EXAM, INCLUDING GONIOSCOPY, AS-OCT, AND EYECAM. ANGLE CLOSURE WAS DEFINED AS THREE OR MORE QUADRANTS I…	33				UNIV SOUTHERN CALIF, KECK SCH MED, DEPT OPHTHALMOL, USC ROSKI EYE INST, LOS ANGELES, CA 90033 USA.; UNIV CALIF SAN FRANCISCO, DEPT OPHTHALMOL, BECKMAN VIS CTR, SAN FRANCISCO, CA USA.; UNIV SOUTHERN CALIF, KECK SCH MED, DEPT PREVENT MED, LOS ANGELES, CA 90033 USA.;	UNIVERSITY OF SOUTHERN CALIFORNIA; UNIVERSITY OF CALIFORNIA SYSTEM; UNIVERSITY OF CALIFORNIA SAN FRANCISCO; UNIVERSITY OF SOUTHERN CALIFORNIA					2024-02-18	PRIMARY ANGLE CLOSURE GLAUCOMA; ANTERIOR SEGMENT OPTICAL COHERENCE TOMOGRAPHY; OCULAR IMAGING; ANGLE CLOSURE; GONIOSCOPY	10.1167/tvst.7.6.33	ARTICLE				BENJAMIN.XU@MED.USC.EDU			NATIONAL EYE INSTITUTE, NATIONAL INSTITUTE OF HEALTH, BETHESDA, MD [U10 EY017337]; RESEARCH TO PREVENT BLINDNESS, NEW YORK, NY	SUPPORTED BY GRANT U10 EY017337 FROM THE NATIONAL EYE INSTITUTE, NATIONAL INSTITUTE OF HEALTH, BETHESDA, MD, AND AN UNRESTRICTED GRANT FROM RESEARCH TO PREVENT BLINDNESS, NEW YORK, NY. ROHIT VARMA IS A RESEARCH TO PREVENT BLINDNESS SYBIL B. HARRINGTON SCHOLAR.	HF7VK	CHINESE-AMERICAN EYE; CLOSURE GLAUCOMA; ADULT CHINESE; 5-YEAR RISK; POPULATION; REPRODUCIBILITY; PREVALENCE; AGREEMENT; PROGRESSION; PARAMETER	6	TRANSL VIS SCI TECHN	TRANSL. VIS. SCI. TECHNOL.	ENGLISH	29	GREEN SUBMITTED, GREEN PUBLISHED, GOLD		12300 TWINBROOK PARKWAY, ROCKVILLE, MD 20852-1606 USA	DEC	9	ROCKVILLE	30619653	J	ASSOC RESEARCH VISION OPHTHALMOLOGY INC	2018		XU, BY (CORRESPONDING AUTHOR), UNIV SOUTHERN CALIF, KECK SCH MED, DEPT OPHTHALMOL, 1450 SAN PABLO ST,4TH FLOOR,SUITE 4700, LOS ANGELES, CA 90033 USA.	OPHTHALMOLOGY			2164-2591	TRANSLATIONAL VISION SCIENCE & TECHNOLOGY
AHMED TY;TURNBULL AMJ;ATTRIDGE NF;BISWAS S;LLOYD IC;AU L;ASHWORTH JL	AHMED, T. Y.;TURNBULL, A. M. J.;ATTRIDGE, N. F.;BISWAS, S.;LLOYD, I. C.;AU, L.;ASHWORTH, J. L.	ANG M, 2013, PLOS ONE, V8, DOI 10.1371/JOURNAL.PONE.0065559;ASHWORTH JL, 2006, SURV OPHTHALMOL, V51, P1, DOI 10.1016/J.SURVOPHTHAL.2005.11.007;BRADFIELD YS, 2011, ARCH OPHTHALMOL-CHIC, V129, P1132, DOI 10.1001/ARCHOPHTHALMOL.2011.225;CHEN YY, 2013, EYE, V27, P1070, DOI 10.1038/EYE.2013.127;CONNELL P, 2008, J AAPOS, V12, P7, DOI 10.1016/J.JAAPOS.2007.04.003;DE ORTA-ARELLANO F, 2011, MYSTERY GLAUCO…	PURPOSE TO DESCRIBE THE ANTERIOR SEGMENT OPTICAL COHERENCE TOMOGRAPHY (AS-OCT) CHARACTERISTICS OF PATIENTS WITH OCULAR MANIFESTATIONS OF MUCOPOLYSACCHARIDOSES TYPE I (HURLER), II (HUNTER), AND VI (MAROTEAUX-LAMY). METHODS PROSPECTIVE, OBSERVATIONAL STUDY OF NINE CONSECUTIVE PATIENTS WITH VARIANTS OF MUCOPOLYSACCHARIDOSIS (MPS) ATTENDING THE PAEDIATRIC OPHTHALMOLOGY SERVICE AT MANCHESTER ROYAL EYE…				327	UNIV MANCHESTER, CENT MANCHESTER FDN TRUST, MANCHESTER ACAD HLTH SCI CTR, MANCHESTER ROYAL EYE HOSP, MANCHESTER, LANCS, ENGLAND.; ROYAL BOURNEMOUTH HOSP, BOURNEMOUTH EYE UNIT, BOURNEMOUTH, DORSET, ENGLAND.; UNIV BATH, CTR PAIN RES, BATH, AVON, ENGLAND.;	MANCHESTER ROYAL EYE HOSPITAL; UNIVERSITY OF MANCHESTER; UNIVERSITY OF BATH					2024-02-18	MUCOPOLYSACCHARIDOSIS; HURLER; HUNTER; MAROTEAUX-LAMY; ANTERIOR SEGMENT OCT; LYSOSOMAL STORAGE DISORDERS	10.1038/eye.2013.281	ARTICLE			1476-5454	TAHAAHMED@DOCTORS.NET.UK	336		BIOMARIN EUROPE LTD.	JLA HAS RECEIVED AN EDUCATIONAL GRANT FROM BIOMARIN EUROPE LTD. THE REMAINING AUTHORS DECLARE NO CONFLICT OF INTEREST.	AD0QO	OPTICAL COHERENCE TOMOGRAPHY; BONE-MARROW-TRANSPLANTATION; CENTRAL CORNEAL THICKNESS; SLIT-LAMP OCT; MUCOPOLYSACCHARIDOSES	3	EYE	EYE	ENGLISH	26	GREEN PUBLISHED, BRONZE	BISWAS, SUSMITO/0000-0003-1548-0572; ATTRIDGE, NINA/0000-0001-9586-372X	MACMILLAN BUILDING, 4 CRINAN ST, LONDON N1 9XW, ENGLAND	MAR	10	LONDON	24384963	J	NATURE PUBLISHING GROUP	2014	BISWAS, SUSMITO/GXZ-6552-2022	AHMED, TY (CORRESPONDING AUTHOR), UNIV HOSP SOUTHAMPTON NHS FDN TRUST, EYE UNIT, SOUTHAMPTON SO16 6YD, HANTS, ENGLAND.	OPHTHALMOLOGY			0950-222X	EYE
MANSOORI T;BALAKRISHNA N	MANSOORI, TARANNUM;BALAKRISHNA, NAGALLA	AGHAIAN E, 2004, OPHTHALMOLOGY, V111, P2211, DOI 10.1016/J.OPHTHA.2004.06.013;BAYHAN HA, 2014, INT J OPHTHALMOL-CHI, V7, P302, DOI 10.3980/J.ISSN.2222-3959.2014.02.19;DOUGHTY MJ, 2000, SURV OPHTHALMOL, V44, P367, DOI 10.1016/S0039-6257(00)00110-7;HUANG JH, 2014, PLOS ONE, V9, DOI 10.1371/JOURNAL.PONE.0098316;HUANG JH, 2013, OPHTHALMOLOGY, V120, P1951, DOI 10.1016/J.OPHTHA.2013.02.022;ISHIBAZAWA A…	TO COMPARE THE CENTRAL CORNEAL THICKNESS (CCT) MEASUREMENTS AND RELIABILITY OF RTVUE XR-100 ANTERIOR SEGMENT OPTICAL COHERENCE TOMOGRAPHY (AS-OCT), AL-SCAN OPTICAL BIOMETER AND SCHWIND SIRIUS ANTERIOR SEGMENT ANALYSIS SYSTEM. THE CCT WAS MEASURED IN ONE HUNDRED AND TWENTY-SEVEN EYES OF 127 HEALTHY SUBJECTS WITH AS-OCT, AL-SCAN AND SIRIUS SYSTEM. MEAN CCT WAS COMPARED AMONG THE INSTRUMENTS, AND TH…				959	ANAND EYE INST, SITA LAKSHMI GLAUCOMA CTR, HYDERABAD 500007, TELANGANA, INDIA.; NATL INST NUTR, DEPT STAT, HYDERABAD 5000017, TELANGANA, INDIA.;	INDIAN COUNCIL OF MEDICAL RESEARCH (ICMR); ICMR - NATIONAL INSTITUTE OF NUTRITION (NIN)					2024-02-18	CCT MEASUREMENT; RTVUE XR-100 ANTERIOR SEGMENT OPTICAL COHERENCE TOMOGRAPHY; AL-SCAN OPTICAL BIOMETER; SCHWIND SIRIUS ANTERIOR SEGMENT ANALYSIS SYSTEM	10.1007/s10792-017-0543-1	ARTICLE			1573-2630	TARANNUMMANSOORI@YAHOO.COM	966				GI4XA	OPTICAL COHERENCE TOMOGRAPHY; INTRAOCULAR-PRESSURE; ULTRASOUND PACHYMETRY; AFRICAN-AMERICANS; CAUCASIANS; HISPANICS; GLAUCOMA; ORBSCAN	3	INT OPHTHALMOL	INT. OPHTHALMOL.	ENGLISH	18		NAGALLA, BALAKRISHNA/0000-0002-5613-0942	VAN GODEWIJCKSTRAAT 30, 3311 GZ DORDRECHT, NETHERLANDS	JUN	8	DORDRECHT	28434071	J	SPRINGER	2018	NAGALLA, BALAKRISHNA/GRR-4393-2022	MANSOORI, T (CORRESPONDING AUTHOR), ANAND EYE INST, SITA LAKSHMI GLAUCOMA CTR, HYDERABAD 500007, TELANGANA, INDIA.	OPHTHALMOLOGY			0165-5701	INTERNATIONAL OPHTHALMOLOGY
WANG SB;CORNISH EE;GRIGG JR;MCCLUSKEY PJ	WANG, SARAH B.;CORNISH, ELISA E.;GRIGG, JOHN R.;MCCLUSKEY, PETER J.	ABOU SHOUSHA M, 2013, OPHTHALMOLOGY, V120, P883, DOI 10.1016/J.OPHTHA.2012.10.025;ABOU SHOUSHA M, 2010, OPHTHALMOLOGY, V117, P1220, DOI 10.1016/J.OPHTHA.2009.10.027;AHN SJ, 2013, CORNEA, V32, P971, DOI 10.1097/ICO.0B013E31828344C9;AMERICAN ACADEMY OF OPHTHALMOLOGY, OPHTHALMOLOGY;ANG M, 2018, PROG RETIN EYE RES, V66, P132, DOI 10.1016/J.PRETEYERES.2018.04.002;AXMANN S, 2016, OCUL IMMUNOL INFLAMM, …	ANTERIOR SEGMENT OPTICAL COHERENCE TOMOGRAPHY (AS-OCT) HAS BECOME ONE OF THE CORNERSTONES OF NON-CONTACT IMAGING MODALITIES FOR ASSESSING SUCH STRUCTURES AS THE CORNEA, ANTERIOR CHAMBER ANGLE, AQUEOUS OUTFLOW PATHWAY, SCLERA, AND OCULAR SURFACE STRUCTURES. AS SUCH, IT HAS A BROAD RANGE OF CLINICAL APPLICATIONS, WHICH HAVE BEEN INDEPENDENTLY REPORTED IN THE LITERATURE. THIS PAPER AIMS TO PRESENT A…				195	UNIV SYDNEY, SAVE SIGHT INST, SYDNEY EYE HOSP, FAC MED & HLTH, SYDNEY, NSW, AUSTRALIA.; SYDNEY EYE HOSP, SYDNEY EYE HOSP FDN, SYDNEY, NSW, AUSTRALIA.; SYDNEY EYE HOSP, SYDNEY, NSW, AUSTRALIA.;	UNIVERSITY OF SYDNEY; NSW HEALTH; SYDNEY HOSPITAL & SYDNEY EYE HOSPITAL; NSW HEALTH; SYDNEY HOSPITAL & SYDNEY EYE HOSPITAL; NSW HEALTH; SYDNEY HOSPITAL & SYDNEY EYE HOSPITAL					2024-02-18	ANGLE; ANTERIOR SEGMENT; CORNEA; GLAUCOMA; OPTICAL COHERENCE TOMOGRAPHY; SCLERA	10.1111/cxo.12869	REVIEW			1444-0938	JOHN.GRIGG@SYDNEY.EDU.AU	207				VJ8RP	CHAMBER ANGLE MEASUREMENTS; TEAR MENISCUS; DESCEMETS-MEMBRANE; ENDOTHELIAL KERATOPLASTY; QUANTITATIVE ASSESSMENT; FEMTOSECOND LASER; SWEPT-SOURCE; CORNEAL; OCT; DIAGNOSIS	3	CLIN EXP OPTOM	CLIN. EXP. OPTOM.	ENGLISH	100		MCCLUSKEY, PETER J/0000-0002-8177-1637	2-4 PARK SQUARE, MILTON PARK, ABINGDON OR14 4RN, OXON, ENGLAND	MAY 1	13	ABINGDON	30635934	J	TAYLOR & FRANCIS LTD	2019	MCCLUSKEY, PETER J/H-7607-2013	GRIGG, JR (CORRESPONDING AUTHOR), UNIV SYDNEY, SAVE SIGHT INST, SYDNEY EYE HOSP, FAC MED & HLTH, SYDNEY, NSW, AUSTRALIA.	OPHTHALMOLOGY			0816-4622	CLINICAL AND EXPERIMENTAL OPTOMETRY
LEUNG CKS;YICK DWF;KWONG YYY;LI FCH;LEUNG DYL;MOHAMED S;THAM CCY;CHUNG-CHAI C;LAM DSC	LEUNG, CHRISTOPHER KAI-SHUN;YICK, DORIS WAI-FONG;KWONG, YOLANDA YUEN-YING;LI, FELIX CHI-HONG;LEUNG, DEXTER YU-LUNG;MOHAMED, SHAHEEDA;THAM, CLEMENT CHEE-YUNG;CHUNG-CHAI, CHI;LAM, DENNIS SHUN-CHIU	ADDICKS EM, 1983, ARCH OPHTHALMOL-CHIC, V101, P795;CAIRNS JE, 1968, AM J OPHTHALMOL, V66, P673, DOI 10.1016/0002-9394(68)91288-9;CANTOR LB, 2003, J GLAUCOMA, V12, P266, DOI 10.1097/00061198-200306000-00015;DEBRY PW, 2002, ARCH OPHTHALMOL-CHIC, V120, P297;HUANG D, 1991, SCIENCE, V254, P1178, DOI 10.1126/SCIENCE.1957169;KRONFELD PC, 1949, T PAC COAST OTOL OPH, V33, P23;PAVLIN CJ, 1992, AM J OPHTHAL…	BACKGROUND: TO DESCRIBE THE USE OF ANTERIOR SEGMENT OPTICAL COHERENCE TOMOGRAPHY (OCT) IN IMAGING INTRABLEB MORPHOLOGY AFTER TRABECULECTOMY. METHODS: 14 POST-TRABECULECTOMY EYES FROM 11 PRIMARY OPEN ANGLE GLAUCOMA AND 3 PRIMARY ANGLE CLOSURE GLAUCOMA SUBJECTS WERE STUDIED. THE BLEBS WERE CLASSIFIED WITH REFERENCE TO SLIT LAMP MORPHOLOGY AND BLEB FUNCTION. THEY INCLUDED DIFFUSE FILTERING (N=7), CY…				340	CHINESE UNIV HONG KONG, DEPT OPHTHALMOL & VISUAL SCI, HONG KONG, HONG KONG, PEOPLES R CHINA.;	CHINESE UNIVERSITY OF HONG KONG					2024-02-18		10.1136/bjo.2006.100321	ARTICLE			1468-2079	TLIMS00@HOTMAIL.COM	344				139IQ	FILTERING BLEBS; FILTRATION SURGERY; GLAUCOMATOUS EYES; MITOMYCIN	3	BRIT J OPHTHALMOL	BR. J. OPHTHALMOL.	ENGLISH	13	GREEN ACCEPTED, GREEN PUBLISHED	THAM, CHEE YUNG CLEMENT/0000-0003-4407-6907; LEUNG, CHRIS/0000-0003-4862-777X; LEUNG, DEXTER/0000-0002-9830-3143	BRITISH MED ASSOC HOUSE, TAVISTOCK SQUARE, LONDON WC1H 9JR, ENGLAND	MAR	5	LONDON	17005548	J	BMJ PUBLISHING GROUP	2007	LI, FELIX/JCP-1106-2023; THAM, CHEE YUNG CLEMENT/AAD-6528-2020; LAM, DENNIS/AAL-1211-2020; LEUNG, CHRIS/N-8015-2019	LEUNG, CKS (CORRESPONDING AUTHOR), CHINESE UNIV HONG KONG, HONG KONG EYE HOSP, DEPT OPHTHALMOL & VISUAL SCI, 147K ARGYLE ST, KOWLOON, HONG KONG, PEOPLES R CHINA.	OPHTHALMOLOGY			0007-1161	BRITISH JOURNAL OF OPHTHALMOLOGY
FU HZ;BASKARAN M;XU YW;LIN S;WONG DWK;LIU J;TUN TA;MAHESH M;PERERA SA;AUNG T	FU, HUAZHU;BASKARAN, MANI;XU, YANWU;LIN, STEPHEN;WONG, DAMON WING KEE;LIU, JIANG;TUN, TIN A.;MAHESH, MEENAKSHI;PERERA, SHAMIRA A.;AUNG, TIN	ANG M, 2018, PROG RETIN EYE RES, V66, P132, DOI 10.1016/J.PRETEYERES.2018.04.002;ASAOKA R, 2016, OPHTHALMOLOGY, V123, P1974, DOI 10.1016/J.OPHTHA.2016.05.029;BEJNORDI BE, 2017, JAMA-J AM MED ASSOC, V318, P2199, DOI 10.1001/JAMA.2017.14585;BURLINA PM, 2017, JAMA OPHTHALMOL, V135, P1170, DOI 10.1001/JAMAOPHTHALMOL.2017.3782;CHANG CC, 2011, ACM T INTEL SYST TEC, V2, DOI 10.1145/1961189.1961199;CONSO…	PURPOSE: ANTERIOR SEGMENT OPTICAL COHERENCE TOMOGRAPHY (AS-OCT) PROVIDES AN OBJECTIVE IMAGING MODALITY FOR VISUALLY IDENTIFYING ANTERIOR SEGMENT STRUCTURES. AN AUTOMATED DETECTION SYSTEM COULD ASSIST OPHTHALMOLOGISTS IN INTERPRETING AS-OCT IMAGES FOR THE PRESENCE OF ANGLE CLOSURE, DESIGN: DEVELOPMENT OF AN ARTIFICIAL INTELLIGENCE AUTOMATED DETECTION SYSTEM FOR THE PRESENCE OF ANGLE CLOSURE. METHO…				37	CHINESE ACAD SCI, NINGBO INST IND TECHNOL, CIXI INST BIOMED ENGN, NINGBO, ZHEJIANG, PEOPLES R CHINA.; INCEPTION INST ARTIFICIAL INTELLIGENCE, ABU DHABI, U ARAB EMIRATES.; AGCY SCI TECHNOL & RES, INST INFOCOMM RES, SINGAPORE, SINGAPORE.; SINGAPORE NATL EYE CTR, SINGAPORE EYE RES INST, SINGAPORE, SINGAPORE.; DUKE NUS MED SCH, EYE ACP, SINGAPORE, SINGAPORE.; BAIDU INC, DEPT ARTIFICIAL INTELLIGENCE I…	CHINESE ACADEMY OF SCIENCES; AGENCY FOR SCIENCE TECHNOLOGY & RESEARCH (A*STAR); A*STAR - INSTITUTE FOR INFOCOMM RESEARCH (I2R); NATIONAL UNIVERSITY OF SINGAPORE; SINGAPORE NATIONAL EYE CENTER; NATIONAL UNIVERSITY OF SINGAPORE; BAIDU; MICROSOFT; SOUTHERN UNIVERSITY OF SCIENCE & TECHNOLOGY; NATIONAL UNIVERSITY OF SINGAPORE; NANYANG TECHNOLOGICAL UNIVERSITY					2024-02-18		10.1016/j.ajo.2019.02.028	ARTICLE			1879-1891	HUAZHUFU@GMAIL.COM	45		ASTAR BIOMEDICAL ENGINEERING PROGRAMME UNDER THE BIOMEDICAL RESEARCH COUNCIL [1521480034]; SINGAPORE TRANSLATIONAL RESEARCH INVESTIGATOR AWARD FROM THE SINGAPORE MINISTRY OF HEALTH'S NATIONAL MEDICAL RESEARCH COUNCIL [NMRC/STAR/0023/2014]	THIS WORK WAS SUPPORTED BY ASTAR BIOMEDICAL ENGINEERING PROGRAMME GRANT 1521480034 UNDER THE BIOMEDICAL RESEARCH COUNCIL AND THE SINGAPORE TRANSLATIONAL RESEARCH INVESTIGATOR AWARD (NMRC/STAR/0023/2014) FROM THE SINGAPORE MINISTRY OF HEALTH'S NATIONAL MEDICAL RESEARCH COUNCIL. FULL ACCESS TO ALL THE DATA IN THE STUDY AND TAKE FULL RESPONSIBILITY FOR THE INTEGRITY OF THE DATA AND THE ACCURACY OF T…	IK4SK	NARROW ANGLES; QUANTITATIVE-ANALYSIS; GLAUCOMA; CHAMBER; CLASSIFICATION; ASSOCIATION; DISEASES; WIDTH		AM J OPHTHALMOL	AM. J. OPHTHALMOL.	ENGLISH	44	HYBRID	XU, YANWU/0000-0002-1779-931X; WONG, DAMON/0000-0003-4601-9121; FU, HUAZHU/0000-0002-9702-5524; LIU, JIANG JIMMY/0000-0001-6281-6505;	STE 800, 230 PARK AVE, NEW YORK, NY 10169 USA	JUL	9	NEW YORK	30849350	J	ELSEVIER SCIENCE INC	2019	XU, YANWU/AAK-8156-2020; WONG, DAMON/JCE-8444-2023; MANI, BASKARAN/GWZ-8299-2022; FU, HUAZHU/A-1411-2014; WANG, MENG/ITR-8699-2023; LIU, JIANG JIMMY/AHB-8921-2022; TIN, AUNG/B-6521-2009; TUN, TIN A/ABA-8732-2020	FU, HZ (CORRESPONDING AUTHOR), ABU DHABI GLOBAL MARKET, AL KHATEM BLDG, ABU DHABI, U ARAB EMIRATES.; XU, YW (CORRESPONDING AUTHOR), BAIDU CAMPUS,10 SHANGDI 10TH ST, BEIJING 100085, PEOPLES R CHINA.	OPHTHALMOLOGY			0002-9394	AMERICAN JOURNAL OF OPHTHALMOLOGY
PARK JH;YEON DY;YOO C;KIM YY	PARK, JI-HYE;YEON, DONG YUN;YOO, CHUNGKWON;KIM, YONG YEON	ANG MHN, 2008, J GLAUCOMA, V17, P1, DOI 10.1097/IJG.0B013E318133A81C;APTEL F, 2014, J REFRACT SURG, V30, P354, DOI 10.3928/1081597X-20140326-01;BELL NP, 2013, ISRN OPHTHALMOL, V2013, P1;DAY AC, 2013, BRIT J OPHTHALMOL, V97, P189, DOI 10.1136/BJOPHTHALMOL-2012-302147;DELLAPORTA A, 1975, SURVEY OF OPHTHALMOLOGY, V20, P137, DOI 10.1016/0039-6257(75)90021-1;ERMIS SS, 2010, CURR EYE RES, V35, P888, DO…	PURPOSE: TO INVESTIGATE THE EFFECT OF THE LATERAL DECUBITUS (LD) POSITION ON THE ANTERIOR CHAMBER (AC) ANGLE IN HEALTHY SUBJECTS. MATERIALS AND METHODS: TWENTY-THREE HEALTHY YOUNG SUBJECTS WERE INCLUDED IN THIS PROSPECTIVE OBSERVATIONAL STUDY. WE MEASURED AC ANGLE PARAMETERS IN THE SITTING AND THE LEFT LD POSITIONS USING ANTERIOR SEGMENT OPTICAL COHERENCE TOMOGRAPHY (VISANTE OCT): TRABECULAR-IRIS…				608	KOREA UNIV, COLL MED, DEPT OPHTHALMOL, 126-1 ANAM DONG 5 GA, SEOUL 02841, SOUTH KOREA.;	KOREA UNIVERSITY; KOREA UNIVERSITY MEDICINE (KU MEDICINE)					2024-02-18	GLAUCOMA; ANTERIOR CHAMBER ANGLE; ANGLE CLOSURE; POSTURE; ANTERIOR SEGMENT OPTICAL COHERENCE TOMOGRAPHY	10.1097/IJG.0000000000000678	ARTICLE			1536-481X	CKYOOMD@KOREA.AC.KR	612				EZ4DM	INTRAOCULAR-PRESSURE; CLOSURE GLAUCOMA; ULTRASOUND BIOMICROSCOPY; LIWAN EYE; GONIOSCOPY; POSITION; SURGERY; CHINESE; IMAGES; DEPTH	7	J GLAUCOMA	J. GLAUCOMA	ENGLISH	33		YOO, CHUNGKWON/0000-0003-4564-4400	TWO COMMERCE SQ, 2001 MARKET ST, PHILADELPHIA, PA 19103 USA	JUL	5	PHILADELPHIA	28369003	J	LIPPINCOTT WILLIAMS & WILKINS	2017	YOO, CHUNGKWON/AAJ-6270-2020	YOO, C (CORRESPONDING AUTHOR), KOREA UNIV, COLL MED, DEPT OPHTHALMOL, 126-1 ANAM DONG 5 GA, SEOUL 02841, SOUTH KOREA.	OPHTHALMOLOGY			1057-0829	JOURNAL OF GLAUCOMA
KANSARA S;BLIEDEN LS;CHUANG AZ;BAKER LA;BELL NP;MANKIEWICZ KA;FELDMAN RM	KANSARA, SEEMA;BLIEDEN, LAUREN S.;CHUANG, ALICE Z.;BAKER, LAURA A.;BELL, NICHOLAS P.;MANKIEWICZ, KIMBERLY A.;FELDMAN, ROBERT M.	AMERICAN ACADEMY OF OPHTHALMOLOGY GLAUCOMA PANEL, 2010, PREF PRACT PATT GUID;ANG GS, 2010, CLIN EXP OPHTHALMOL, V38, P778, DOI 10.1111/J.1442-9071.2010.02360.X;CONGDON NG, 2002, BRIT J OPHTHALMOL, V86, P18, DOI 10.1136/BJO.86.1.18;CUMBA RICARDO J, 2013, ISRN OPHTHALMOL, V2013, P828972, DOI 10.1155/2013/828972;CUMBA RJ, 2012, J OPHTHALMOL, V2012, DOI 10.1155/2012/487309;FOSTER PJ, 2002, BRIT J OPH…	PURPOSE: TO EVALUATE THE CHANGE IN TRABECULAR-IRIS CIRCUMFERENCE VOLUME (TICV) AFTER LASER PERIPHERAL IRIDOTOMY (LPI) IN PRIMARY ANGLE CLOSURE (PAC) SPECTRUM EYES. PATIENTS AND METHODS: FORTY-TWO CHRONIC PAC SPECTRUM EYES FROM 24 PATIENTS WERE ENROLLED. EYES WITH ANTERIOR CHAMBER ABNORMALITIES AFFECTING ANGLE MEASUREMENT WERE EXCLUDED. INTRAOCULAR PRESSURE, SLIT LAMP EXAMINATION, AND GONIOSCOPY W…				E469	UNIV TEXAS HOUSTON, SCH MED, RUIZ DEPT OPHTHALMOL & VISUAL SCI, HOUSTON, TX USA.; ROBERT CIZIK EYE CLIN, 6400 FANNIN ST,SUITE 1800, HOUSTON, TX 77030 USA.;	UNIVERSITY OF TEXAS SYSTEM; UNIVERSITY OF TEXAS HEALTH SCIENCE CENTER HOUSTON					2024-02-18	LASER PERIPHERAL IRIDOTOMY; ANTERIOR SEGMENT OPTICAL COHERENCE TOMOGRAPHY; TRABECULAR-IRIS SPACE AREA; TRABECULAR-IRIS CIRCUMFERENCE VOLUME; ANTERIOR CHAMBER ANGLE	10.1097/IJG.0000000000000293	ARTICLE			1536-481X	LBLIEDEN@CIZIKEYE.ORG	E474		NATIONAL EYE INSTITUTE VISION CORE GRANT [P30EY010608]; HERMANN EYE FUND; RESEARCH TO PREVENT BLINDNESS	SUPPORTED IN PART BY NATIONAL EYE INSTITUTE VISION CORE GRANT P30EY010608, A CHALLENGE GRANT TO THE UNIVERSITY OF TEXAS MEDICAL SCHOOL AT HOUSTON FROM RESEARCH TO PREVENT BLINDNESS, AND THE HERMANN EYE FUND.	DK8AV	ULTRASOUND BIOMICROSCOPY; LONGITUDINAL CHANGES; SEGMENT MORPHOLOGY; GLAUCOMA; CONFIGURATION; ASSOCIATION; PREVALENCE; PREVENTION; SUSPECTS	5	J GLAUCOMA	J. GLAUCOMA	ENGLISH	32	GREEN ACCEPTED	FELDMAN, ROBERT/0000-0001-8586-6345	TWO COMMERCE SQ, 2001 MARKET ST, PHILADELPHIA, PA 19103 USA	MAY	6	PHILADELPHIA	26066504	J	LIPPINCOTT WILLIAMS & WILKINS	2016	MANKIEWICZ, KIMBERLY/GXG-8359-2022	BLIEDEN, LS (CORRESPONDING AUTHOR), ROBERT CIZIK EYE CLIN, 6400 FANNIN ST,SUITE 1800, HOUSTON, TX 77030 USA.	OPHTHALMOLOGY			1057-0829	JOURNAL OF GLAUCOMA
ERASLAN N;CELIKAY O	ERASLAN, NUMAN;CELIKAY, OSMAN	ANONYMOUS, 2017, BR J OPHTHALMOL, V101, P130, DOI 10.1136/BJOPHTHALMOL-2016-EGSGUIDELINE.003;ANONYMOUS, 2017, BRIT J OPHTHALMOL, V101, P73, DOI 10.1136/BJOPHTHALMOL-2016-EGSGUIDELINE.002;AUGUSTIN AJ, 1995, GRAEF ARCH CLIN EXP, V233, P694, DOI 10.1007/BF00164671;BATAWI H, 2018, CORNEA, V37, P712, DOI 10.1097/ICO.0000000000001575;CHEN HY, 2015, OPTOMETRY VISION SCI, V92, PE227, DOI 10.1097/OPX.0000…	BACKGROUND: IN THIS STUDY, WE AIMED TO ASSESS THE CENTRAL CORNEAL EPITHELIAL THICKNESS (CET), CENTRAL CORNEAL STROMAL THICKNESS (CST), AND TOTAL CENTRAL CORNEAL THICKNESS (CCT) THINNING RELATIONSHIPS WITH DRY EYE DEVELOPMENT MONITORING AND UNDERESTIMATED MEASUREMENT OF INTRAOCULAR PRESSURE (IOP) IN PRIMARY OPEN-ANGLE GLAUCOMA (POAG) PATIENTS TREATED WITH TIMOLOL, DORZOLAMIDE, AND BRIMONIDINE.METH…	103728				DISKAPI YILDIRIM BEYAZIT TRAINING & RES HOSP, DEPT OPHTHALMOL, ANKARA, TURKIYE.;	DISKAPI YILDIRIM BEYAZIT TRAINING & RESEARCH HOSPITAL					2024-02-18	ANTERIOR SEGMENT OPTICAL COHERENCE TOMOGRAPHY; CORNEAL LAYER THINNING; DRY EYE MONITORING; PRIMARY OPEN-ANGLE GLAUCOMA; TOPICAL GLAUCOMA MEDICATION	10.1016/j.pdpdt.2023.103728	ARTICLE	AUG 2023		1873-1597	NUMANERASLAN@HOTMAIL.COM					Q6BB1	OCULAR SURFACE; TIMOLOL; LATANOPROST; BRIMONIDINE; PREVALENCE; THERAPY		PHOTODIAGN PHOTODYN	PHOTODIAGNOSIS PHOTODYN. THER.	ENGLISH	43			RADARWEG 29, 1043 NX AMSTERDAM, NETHERLANDS	SEP	6	AMSTERDAM	37517427	J	ELSEVIER	2023	ERASLAN, NUMAN/ADO-1391-2022	ERASLAN, N (CORRESPONDING AUTHOR), DISKAPI YILDIRIM BEYAZIT TRAINING & RES HOSP, DEPT OPHTHALMOL, ANKARA, TURKIYE.	ONCOLOGY			1572-1000	PHOTODIAGNOSIS AND PHOTODYNAMIC THERAPY
LUO M;XIAO H;HUANG JJ;JIN L;LI ZD;TU S;HUANG HS;ZHU YT;LI YQ;ZHUO YH	LUO, MAN;XIAO, HUI;HUANG, JINGJING;JIN, LING;LI, ZHIDONG;TU, SHU;HUANG, HAISHUN;ZHU, YINGTING;LI, YIQING;ZHUO, YEHONG	ALSAGOFF Z, 2001, CLIN EXP OPHTHALMOL, V29, P22, DOI 10.1046/J.1442-9071.2001.00365.X;ALTMAN DG, 1994, J NATL CANCER I, V86, P829, DOI 10.1093/JNCI/86.11.829;ALTMAN DG, 1998, BRIT J CANCER, V78, P556, DOI 10.1038/BJC.1998.537;ANG M, 2016, BRIT J OPHTHALMOL, V100, P1557, DOI 10.1136/BJOPHTHALMOL-2015-307706;ANG M, 2015, OPHTHALMOLOGY, V122, P1740, DOI 10.1016/J.OPHTHA.2015.05.017;BEER TW, 1998, HU…	PURPOSE: THE PURPOSE OF THIS STUDY WAS TO EXPLORE A QUANTITATIVE GRADING SYSTEM OF THE FILTERING BLEB COMBINED ANTERIOR SEGMENT OPTICAL COHERENCE TOMOGRAPHY ANGIOGRAPHY (AS-OCTA) VASCULAR FEATURES AND OPTICAL COHERENCE TOMOGRAPHY (OCT) MORPHOLOGICAL FEATURES. METHODS: ONE HUNDRED THREE EYES OF 103 PATIENTS DIAGNOSED WITH PRIMARY OPEN-ANGLE GLAUCOMA AND UNDERGONE TRABECULECTOMY OVER 6 MONTHS WERE …	18				SUN YAT SEN UNIV, GUANGDONG PROV CLIN RES CTR OCULAR DIS, GUANGDONG PROV KEY LAB OPHTHALMOL & VISUAL SCI, STATE KEY LAB OPHTHALMOL,ZHONGSHAN OPHTHALM CTR, GUANGZHOU, PEOPLES R CHINA.; PEKING UNIV, CTR FRONTIERS COMP STUDIES, SCH COMP SCI, BEIJING 100871, PEOPLES R CHINA.; 7 JINSUI RD, GUANGZHOU 510060, PEOPLES R CHINA.;	SUN YAT SEN UNIVERSITY; PEKING UNIVERSITY					2024-02-18	ANTERIOR SEGMENT OPTICAL COHERENCE TOMOGRAPHY ANGIOGRAPHY (AS-OCTA); FILTERING BLEB FUNCTION; ANGIOGRAPHIC PARAMETER; MORPHOLOGICAL PARAMETER; ANTERIOR SEGMENT OPTICAL COHERENCE TOMOGRAPHY (AS-OCT)	10.1167/tvst.12.7.18	ARTICLE				ZHUYT35@MAIL.SYSU.EDU.CN; LIYIQING3@MAIL.SYSU.EDU.CN; ZHUOYH@MAIL.SYSU.EDU.CN			OGY PROGRAM OF GUANGZHOU, CHINA [202206080005]; NATURAL SCIENCE FOUNDATION OF GUANGDONG PROVINCE [2022A1515012168]	OGY PROGRAM OF GUANGZHOU, CHINA (202206080005) ; AND THE NATURAL SCIENCE FOUNDATION OF GUANGDONG PROVINCE (2022A1515012168) .	Z0OT1	COHERENCE TOMOGRAPHY ANGIOGRAPHY; ANGIOGENESIS; NEOVASCULARIZATION; APPEARANCE	7	TRANSL VIS SCI TECHN	TRANSL. VIS. SCI. TECHNOL.	ENGLISH	44	GREEN PUBLISHED, GOLD	MAN, LUO/0000-0002-5152-0909	12300 TWINBROOK PARKWAY, ROCKVILLE, MD 20852-1606 USA	JUL	12	ROCKVILLE	37471100	J	ASSOC RESEARCH VISION OPHTHALMOLOGY INC	2023	MAN, LUO/IYT-4077-2023	ZHU, YT; LI, YQ; ZHUO, YH (CORRESPONDING AUTHOR), 7 JINSUI RD, GUANGZHOU 510060, PEOPLES R CHINA.	OPHTHALMOLOGY			2164-2591	TRANSLATIONAL VISION SCIENCE & TECHNOLOGY
XU BY;ISRAELSEN P;PAN BX;WANG DD;JIANG XJ;VARMA R	XU, BENJAMIN Y.;ISRAELSEN, PAUL;PAN, BILLY X.;WANG, DANDAN;JIANG, XUEJUAN;VARMA, ROHIT	ASRANI S, 2008, ARCH OPHTHALMOL-CHIC, V126, P765, DOI 10.1001/ARCHOPHT.126.6.765;BLIEDEN LS, 2015, INVEST OPHTH VIS SCI, V56, P2842, DOI 10.1167/IOVS.14-15883;CHONG RS, 2013, INVEST OPHTH VIS SCI, V54, P1650, DOI 10.1167/IOVS.12-9986;CICCHETTI D., 1994, PSYCHOLOGICAL ASSESSMENT, V6, P284, DOI 10.1037/1040-3590.6.4.284, DOI 10.1037/1040-3590.6.4.284;DASTIRIDOU AI, 2015, J OPHTHALMOL, V2015, DOI 10…	PURPOSE. THE PURPOSE OF THIS STUDY WAS TO EVALUATE THE BENEFIT OF ANALYZING AN INCREASED NUMBER OF ANTERIOR SEGMENT OPTICAL COHERENCE TOMOGRAPHY (AS-OCT) IMAGES ON MEASUREMENT VALUES OF VARIOUS ANTERIOR SEGMENT PARAMETERS. METHODS. SUBJECTS FOR THIS CROSS-SECTIONAL STUDY WERE RECRUITED FROM THE CHINESE AMERICAN EYE STUDY (CHES), A POPULATION-BASED STUDY IN LOS ANGELES, CA. THIRTY-TWO AS-OCT IMAGE…				6313	UNIV SOUTHERN CALIF LOS ANGELES, KECK SCH MED, ROSKI EYE INST, LOS ANGELES, CA USA.; UNIV SOUTHERN CALIF LOS ANGELES, KECK SCH MED, LOS ANGELES, CA USA.;						2024-02-18	ANTERIOR SEGMENT ANATOMY; ANTERIOR SEGMENT OCT; IMAGING METHODS	10.1167/iovs.16-19755	ARTICLE			1552-5783	BENJAMIN.XU@MED.USC.EDU	6319		NATIONAL INSTITUTES OF HEALTH/NATIONAL EYE INSTITUTE [EY-017337]; RESEARCH TO PREVENT BLINDNESS, INC.	SUPPORTED BY NATIONAL INSTITUTES OF HEALTH/NATIONAL EYE INSTITUTE GRANT EY-017337 AND A RESEARCH TO PREVENT BLINDNESS, INC., UNRESTRICTED GRANT. ROHIT VARMA IS A RESEARCH TO PREVENT BLINDNESS SYBIL B. HARRINGTON SCHOLAR.	EI3HG	ANGLE-CLOSURE; CHAMBER ANGLE; IRIS VOLUME; INTRAOCULAR-PRESSURE; SCHWALBES LINE; CONFIGURATION; GONIOSCOPY; WIDTH	14	INVEST OPHTH VIS SCI	INVEST. OPHTHALMOL. VIS. SCI.	ENGLISH	29	GREEN PUBLISHED, GOLD		12300 TWINBROOK PARKWAY, ROCKVILLE, MD 20852-1606 USA	NOV	7	ROCKVILLE	27893097	J	ASSOC RESEARCH VISION OPHTHALMOLOGY INC	2016		XU, BY (CORRESPONDING AUTHOR), UNIV SOUTHERN CALIF, KECK SCH MED, DEPT OPHTHALMOL, 1450 SAN PABLO ST,4TH FLOOR, LOS ANGELES, CA 90033 USA.	OPHTHALMOLOGY			0146-0404	INVESTIGATIVE OPHTHALMOLOGY & VISUAL SCIENCE
ROMERA-ROMERO P;LOSCOS-ARENAS J;MOLL-UDINA A;ROMANIC-BUBALO N;CASTELLVI-MANENT J;VALLDEPERAS X	ROMERA-ROMERO, PAU;LOSCOS-ARENAS, JORDI;MOLL-UDINA, AINA;ROMANIC-BUBALO, NEVENA;CASTELLVI-MANENT, JORDI;VALLDEPERAS, XAVIER	ANAND N, 2011, J GLAUCOMA, V20, P21, DOI 10.1097/IJG.0B013E3181CCB926;ANAND S, 2008, EYE, V22, P1040, DOI 10.1038/SJ.EYE.6702833;CHENG JW, 2010, OPHTHALMOLOGICA, V224, P138, DOI 10.1159/000236039;DEVLOO S, 2005, GRAEF ARCH CLIN EXP, V243, P1206, DOI 10.1007/S00417-005-0020-9;EL SAYYAD F, 2000, OPHTHALMOLOGY, V107, P1671, DOI 10.1016/S0161-6420(00)00263-3;FAKHRAIE G, 2011, IRAN J OPHTHALMOL, V23, …	PURPOSE: TO REPORT 2-YEAR RESULTS OF DEEP SCLERECTOMY (DS) WITH MITOMYCIN C AND THE UVEOSCLERAL IMPLANT ESNOPER-CLIP (AJL OPHTHALMICS, ALAVA, SPAIN), A NONABSORBABLE HEMA IMPLANT, AND THE MORPHOLOGIC ANALYSIS OF THE SURGICAL AREA WITH ANTERIOR SEGMENT OPTICAL COHERENCE TOMOGRAPHY (AS-OCT). MATERIALS AND METHODS: IN TOTAL, 41 EYES OF 41 PATIENTS WITH MEDICALLY UNCONTROLLED OPEN ANGLE GLAUCOMA WHO …				929	OPHTHALMOL DEPT, CARRETERA CANYET S-N, BARCELONA 08916, SPAIN.;						2024-02-18	OPHTHALMOLOGY; GLAUCOMA; DEEP SCLERECTOMY; UVEOSCLERAL IMPLANT; NONPENETRATING GLAUCOMA SURGERY; ANTERIOR SEGMENT OPTICAL COHERENCE TOMOGRAPHY; AS-OCT	10.1097/IJG.0000000000000756	ARTICLE			1536-481X	ROMERA.PAU@GMAIL.COM	935				FP0MM	INTRASCLERAL BLEB HEIGHT; OPEN-ANGLE GLAUCOMA; COLLAGEN IMPLANT; TRABECULECTOMY BLEBS; FILTERING BLEBS; MORPHOLOGY	10	J GLAUCOMA	J. GLAUCOMA	ENGLISH	31		UDINA, AINA MOLL/0000-0003-4753-2111; VALLDEPERAS, XAVIER/0000-0002-6343-6405; ROMERA ROMERO, PAU/0000-0003-1699-6378; CASTELLVI-MANENT, JORDI/0000-0001-8395-9548	TWO COMMERCE SQ, 2001 MARKET ST, PHILADELPHIA, PA 19103 USA	OCT	7	PHILADELPHIA	28991150	J	LIPPINCOTT WILLIAMS & WILKINS	2017	UDINA, AINA MOLL/AAF-7319-2021	ROMERA-ROMERO, P (CORRESPONDING AUTHOR), OPHTHALMOL DEPT, CARRETERA CANYET S-N, BARCELONA 08916, SPAIN.; ROMERA-ROMERO, P (CORRESPONDING AUTHOR), CARRER POMPEU FABRA 10,2 7, BARCELONA 08940, SPAIN.	OPHTHALMOLOGY			1057-0829	JOURNAL OF GLAUCOMA
AGRA C;AGRA L;DANTAS J;ARANTES TEFE;NETO JLD	AGRA, CRISTIANA;AGRA, LYDIANNE;DANTAS, JEANINE;FARIA E ARANTES, TIAGO EUGENIO;DE ANDRADE NETO, JOAO LINS	AGRAWAL RV, 2010, INDIAN J OPHTHALMOL, V58, P11, DOI 10.4103/0301-4738.58468;BODH SONAM A, 2011, OMAN J OPHTHALMOL, V4, P3, DOI 10.4103/0974-620X.77655;DE OLIVEIRA F, 2009, ARQ BRAS OFTALMOL, V72, P457, DOI 10.1590/S0004-27492009000400006;EHLERS N, 1975, ACTA OPHTHALMOL, V53, P34;HEINZ C, 2012, OPHTHALMIC RES, V48, P38, DOI 10.1159/000336021;HIRANO K, 2001, CORNEA, V20, P281, DOI 10.1097/00003226…	PURPOSE: TO ANALYZE THE CORNEAL THICKNESS AND ANTERIOR CHAMBER (AC) ANGLE USING ANTERIOR SEGMENT OPTICAL COHERENCE TOMOGRAPHY (AS-OCT) IN PATIENTS WITH ACUTE ANTERIOR UVEITIS (AAU). METHODS: TWENTY TWO PATIENTS (24 EYES) WERE INCLUDED. ALL PATIENTS UNDERWENT COMPLETE OPHTHALMOLOGICAL EXAMINATION, APPLANATION TONOMETRY AND AS-OCT AT DIAGNOSIS AND FIFTEEN DAYS AFTER TREATMENT. RESULTS: AVERAGE CORN…				1	FUNDACAO ALTINO VENTURA, BR-50070040 RECIFE, PE, BRAZIL.;						2024-02-18	UVEITIS, ANTERIOR/DIAGNOSIS; TOMOGRAPHY, OPTICAL COHERENCE; ANTERIOR EYE SEGMENT; INFLAMMATION; CORNEAL PACHYMETRY	10.5935/0004-2749.20140002	ARTICLE			1678-2925	CLMAGRA@GMAIL.COM	3				AN3KB	CORNEAL THICKNESS; APPLANATION	1	ARQ BRAS OFTALMOL	ARQ. BRAS. OFTALMOL.	ENGLISH	13	GOLD, GREEN SUBMITTED	ARANTES, TIAGO EF/0000-0002-8122-3446; AGRA, CRISTIANA/0000-0002-4400-7744	ALAMEDA SANTOS 1343, 11 ANDAR CJ 1110, CERQUEIRA CESAR, SAO PAULO, SP 00000, BRAZIL	JAN-FEB	3	SAO PAULO	25076363	J	CONSEL BRASIL OFTALMOLOGIA	2014	ARANTES, TIAGO EF/I-3093-2013	AGRA, C (CORRESPONDING AUTHOR), FUNDACAO ALTINO VENTURA, RUA SOLEDADE 170, BR-50070040 RECIFE, PE, BRAZIL.	OPHTHALMOLOGY			0004-2749	ARQUIVOS BRASILEIROS DE OFTALMOLOGIA
SINGH M;CHEW PTK;FRIEDMAN DS;NOLAN WP;SEE JL;SMITH SD;ZHENG C;FOSTER PJ;AUNG T	SINGH, MANDEEP;CHEW, PAUL T. K.;FRIEDMAN, DAVID S.;NOLAN, WINIFRED P.;SEE, JOVINA L.;SMITH, SCOTT D.;ZHENG, CE;FOSTER, PAUL J.;AUNG, TIN	ADDICKS EM, 1983, ARCH OPHTHALMOL-CHIC, V101, P795;AVITABILE T, 1998, OPHTHALMOLOGICA S, V21, P17;BROADWAY DC, 2004, OPHTHALMOLOGY, V111, P665, DOI 10.1016/J.OPHTHA.2003.07.009;CAIRNS JE, 1968, AM J OPHTHALMOL, V66, P673, DOI 10.1016/0002-9394(68)91288-9;CANTOR LB, 2003, J GLAUCOMA, V12, P266, DOI 10.1097/00061198-200306000-00015;CROWSTON JG, 2004, EYE, V18, P299, DOI 10.1038/SJ.EYE.6700638;DEBRY…	OBJECTIVE: TO IMAGE TRABECULECTOMY BLEBS USING ANTERIOR SEGMENT OPTICAL COHERENCE TOMOGRAPHY (AS-OCT). DESIGN: PROSPECTIVE CROSS-SECTIONAL STUDY. PARTICIPANTS: FIFTY-FIVE PATIENTS WHO HAD PREVIOUSLY UNDERGONE TRABECULECTOMY SURGERY. METHODS: ALL BLEBS WERE IMAGED WITH A PROTOTYPE OF THE AS-OCT. STANDARDIZED COLOR MONOPHOTOGRAPHS OF BLEBS WERE ALSO OBTAINED. BLEBS WERE ASSESSED FOR THE FOLLOWING Q…				47	SINGAPORE NATL EYE CTR, GLAUCOMA DEPT, SINGAPORE 168751, SINGAPORE.; NATL UNIV SINGAPORE HOSP, SINGAPORE 117548, SINGAPORE.; NATL UNIV SINGAPORE, SINGAPORE 117548, SINGAPORE.; JOHNS HOPKINS UNIV, BLOOMBERG SCH PUBL HLTH, BALTIMORE, MD USA.; WILMER EYE INST, BALTIMORE, MD USA.; COLE EYE INST, CLEVELAND, OH USA.; INST OPHTHALMOL, LONDON, ENGLAND.; MOORFIELDS EYE HOSP, LONDON, ENGLAND.;	SINGAPORE NATIONAL EYE CENTER; NATIONAL UNIVERSITY OF SINGAPORE; NATIONAL UNIVERSITY OF SINGAPORE; JOHNS HOPKINS UNIVERSITY; JOHNS HOPKINS BLOOMBERG SCHOOL OF PUBLIC HEALTH; JOHNS HOPKINS UNIVERSITY; JOHNS HOPKINS MEDICINE; UNIVERSITY OF LONDON; UNIVERSITY COLLEGE LONDON; UNIVERSITY OF LONDON; UNIVERSITY COLLEGE LONDON; MOORFIELDS EYE HOSPITAL NHS FOUNDATION TRUST					2024-02-18		10.1016/j.ophtha.2006.05.078	ARTICLE				TIN11@PACIFIC.NET.SG	53				123DA	FILTERING BLEBS; MITOMYCIN-C; ULTRASOUND BIOMICROSCOPY; IN-VIVO; SURGERY; COMPLICATIONS; APPEARANCE; SCALE; EYES	1	OPHTHALMOLOGY	OPHTHALMOLOGY	ENGLISH	25		SINGH, MANDEEP/0000-0003-1749-0088; FOSTER, PAUL/0000-0002-4755-177X; FRIEDMAN, DAVID/0000-0002-2055-5797	360 PARK AVE SOUTH, NEW YORK, NY 10010-1710 USA	JAN	7	NEW YORK	17070581	J	ELSEVIER SCIENCE INC	2007	SINGH, MANDEEP/AAS-8842-2021; FOSTER, PAUL/V-7288-2019; TIN, AUNG/B-6521-2009	AUNG, T (CORRESPONDING AUTHOR), SINGAPORE NATL EYE CTR, GLAUCOMA DEPT, 11 3RD HOSP AVE, SINGAPORE 168751, SINGAPORE.	OPHTHALMOLOGY			0161-6420	OPHTHALMOLOGY
[truncated: 742 more rows]
[truncated: 18 more columns]
