# Supplementary material for: The applications of anterior segment optical coherence tomography in glaucoma: a 20-year bibliometric analysis
Source: PeerJ. 2024 Nov 28;12:e18611. doi: 10.7717/peerj.18611 (PMC11608565; doi:10.7717/peerj.18611)
Supplement: Supplemental Information 2 [file peerj-12-18611-s002.xlsx]

## Sheet: Sheet1
source	documents	citations	Average citation/Publication
progress in retinal and eye research	2	261	130.5
archives of ophthalmology	7	822	117.429
optics express	2	166	84
ophthalmology	46	3443	74.8478
survey of ophthalmology	5	204	40.8
journal of biomedical optics	1	38	38
journal of telemedicine and telecare	1	38	38
ieee transactions on cybernetics	1	37	37
current opinion in ophthalmology	10	359	35.9
acta ophthalmologica scandinavica	1	35	35
ieee transactions on medical imaging	2	68	34
british journal of ophthalmology	44	1425	32.3864
ieee journal of biomedical and health informatics	1	32	32
investigative ophthalmology & visual science	69	2190	31.7391
journal of cataract and refractive surgery	32	979	30.5938
clinical and experimental ophthalmology	22	610	27.7273
medical image analysis	2	53	26.5
american journal of ophthalmology	37	968	26.1622
british medical bulletin	1	25	25
oncotarget	1	24	24
biomed research international	3	71	23.6667
acta ophthalmologica	27	589	21.8148
eye	21	404	19.2381
ophthalmic epidemiology	1	19	19
journal of refractive surgery	5	92	18.4
journal of medical systems	3	53	17.6667
biomedical optics express	3	51	17
cornea	30	482	16.0667
new trends in basic and clinical research of glaucoma: a	1	16	16
yonsei medical journal	1	16	16
jama ophthalmology	8	125	15.625
journal of glaucoma	86	1301	15.1279
asia-pacific journal of ophthalmology	6	90	15
graefes archive for clinical and experimental ophthalmology	29	423	14.5862
ophthalmic surgery lasers & imaging	9	127	14.1111
ophthalmic and physiological optics	2	28	14
experimental eye research	2	27	13.5
computer methods and programs in biomedicine	3	40	13.3333
plos one	23	304	13.2174
veterinary ophthalmology	3	39	13
japanese journal of ophthalmology	13	163	12.5385
journal of biophotonics	2	25	12.5
eye and vision	5	62	12.4
biomedical signal processing and control	4	49	12.25
retina-the journal of retinal and vitreous diseases	6	73	12.1667
cochrane database of systematic reviews	2	24	12
optometry and vision science	8	95	11.875
journal of ophthalmology	23	271	11.7826
clinical and experimental optometry	4	47	11.75
current eye research	15	174	11.6
contact lens & anterior eye	2	23	11.5
ophthalmologica	2	23	11.5
canadian journal of ophthalmology-journal canadien d ophtalmologie	7	77	11
multimedia tools and applications	1	11	11
seminars in ophthalmology	13	139	10.6923
sensors	1	10	10
journal of medical imaging and health informatics	1	9	9
european journal of ophthalmology	25	224	8.96
translational vision science & technology	25	220	8.8
biology-basel	1	7	7
scientific reports	17	113	6.64706
indian journal of ophthalmology	24	150	6.25
acta biomaterialia	1	6	6
biosensors-basel	1	6	6
medical science monitor	1	6	6
ophthalmic research	6	36	6
pharmaceuticals	1	6	6
international journal of ophthalmology	10	59	5.9
ocular immunology and inflammation	3	17	5.66667
international ophthalmology	15	82	5.46667
eye & contact lens-science and clinical practice	7	38	5.42857
iranian journal of ophthalmology	1	5	5
lasers in medical science	4	20	5
medicine	6	29	4.83333
journal of clinical medicine	16	70	4.375
arquivos brasileiros de oftalmologia	3	13	4.33333
annals of translational medicine	1	4	4
computers in biology and medicine	1	4	4
cutaneous and ocular toxicology	1	4	4
journal of aapos	3	12	4
laser physics letters	1	4	4
molecular vision	1	4	4
ophthalmology and therapy	2	8	4
bmc ophthalmology	33	126	3.81818
frontiers in bioengineering and biotechnology	2	7	3.5
journal of international medical research	2	7	3.5
computational and mathematical methods in medicine	1	3	3
chinese medical journal	3	8	2.66667
journal of healthcare engineering	2	5	2.5
journal of ocular pharmacology and therapeutics	3	7	2.33333
diagnostics	5	10	2
experimental biology and medicine	1	2	2
jcpsp-journal of the college of physicians and surgeons pakistan	1	2	2
ophthalmic plastic and reconstructive surgery	1	2	2
world journal of clinical cases	1	2	2
journal francais d ophtalmologie	7	10	1.42857
american journal of translational research	1	1	1
bioengineering-basel	1	1	1
cancer radiotherapie	1	1	1
frontiers in medicine	4	4	1
photodiagnosis and photodynamic therapy	6	4	0.666667
klinische monatsblatter fur augenheilkunde	3	1	0.333333
biomedical research-india	1	0	0
bmj open	1	0	0
experimental and therapeutic medicine	1	0	0
expert review of medical devices	1	0	0
heliyon	1	0	0
iet image processing	1	0	0
international journal of clinical and experimental medicine	2	0	0
journal of pharmacological sciences	1	0	0
medicina-lithuania	1	0	0
ocular surface	1	0	0
ophthalmic genetics	1	0	0
orvosi hetilap	1	0	0
postepy higieny i medycyny doswiadczalnej	1	0	0
rsc advances	1	0	0
